# Supplementary material for: Nineteenth- and twentieth-century semi-quantitative surface ozone along subtropical European to tropical Africa Atlantic coasts
Source: Copernicus journal article supplement (doi:10.5194/essd-17-2437-2025), 2025-06-06

# CLIMATOL 4.0.0

Homogenization  
graphic output of  
O<sub>3</sub>  
1863–1905

# O3 data

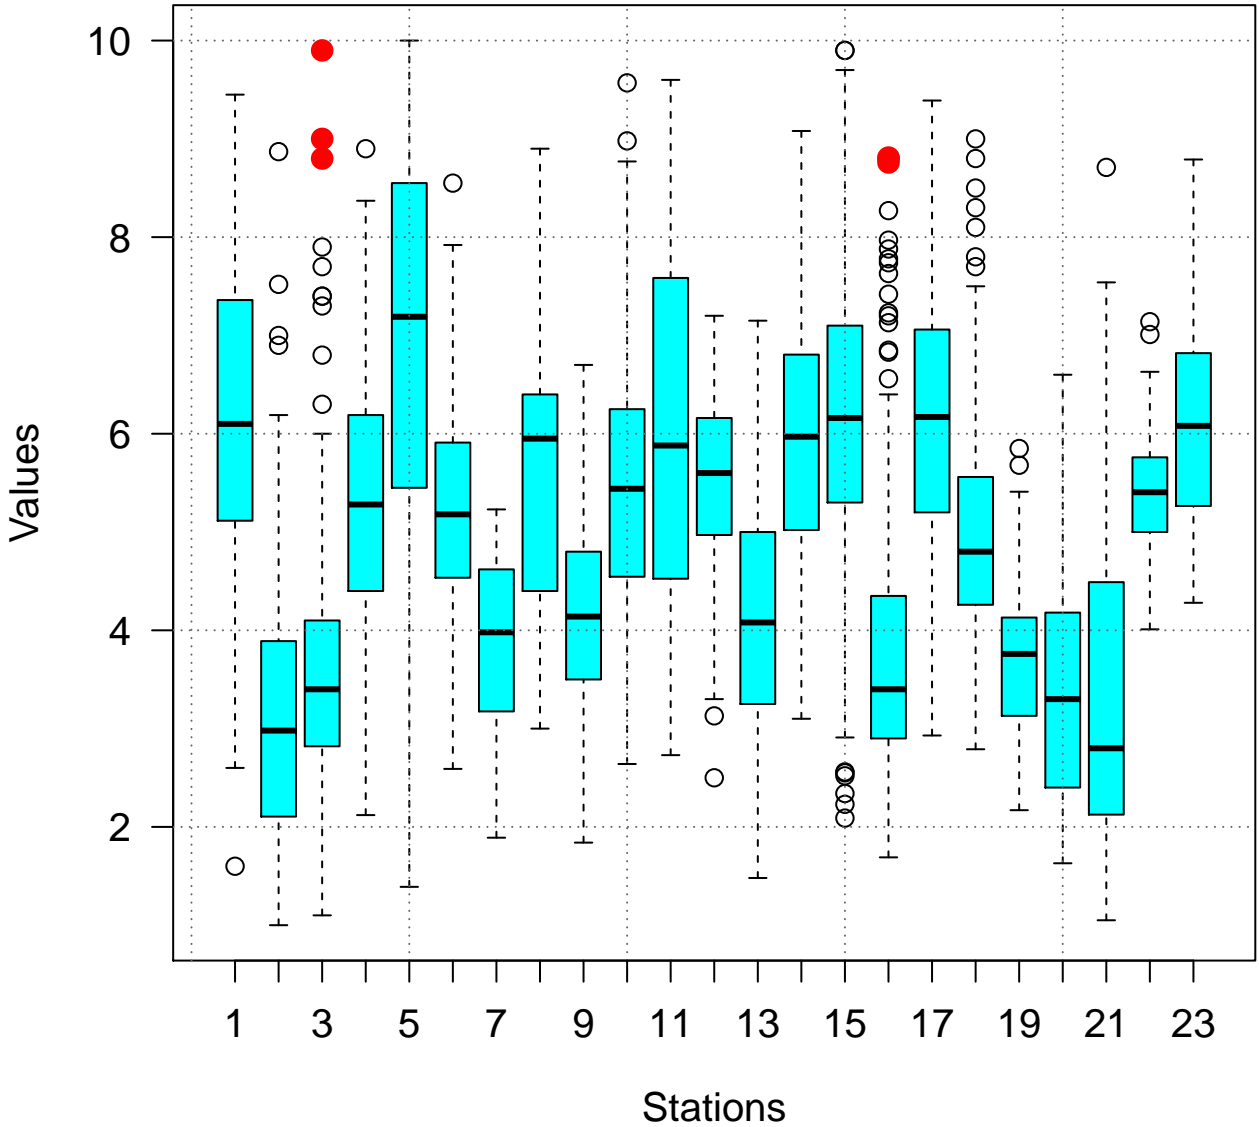

### O3 data increments

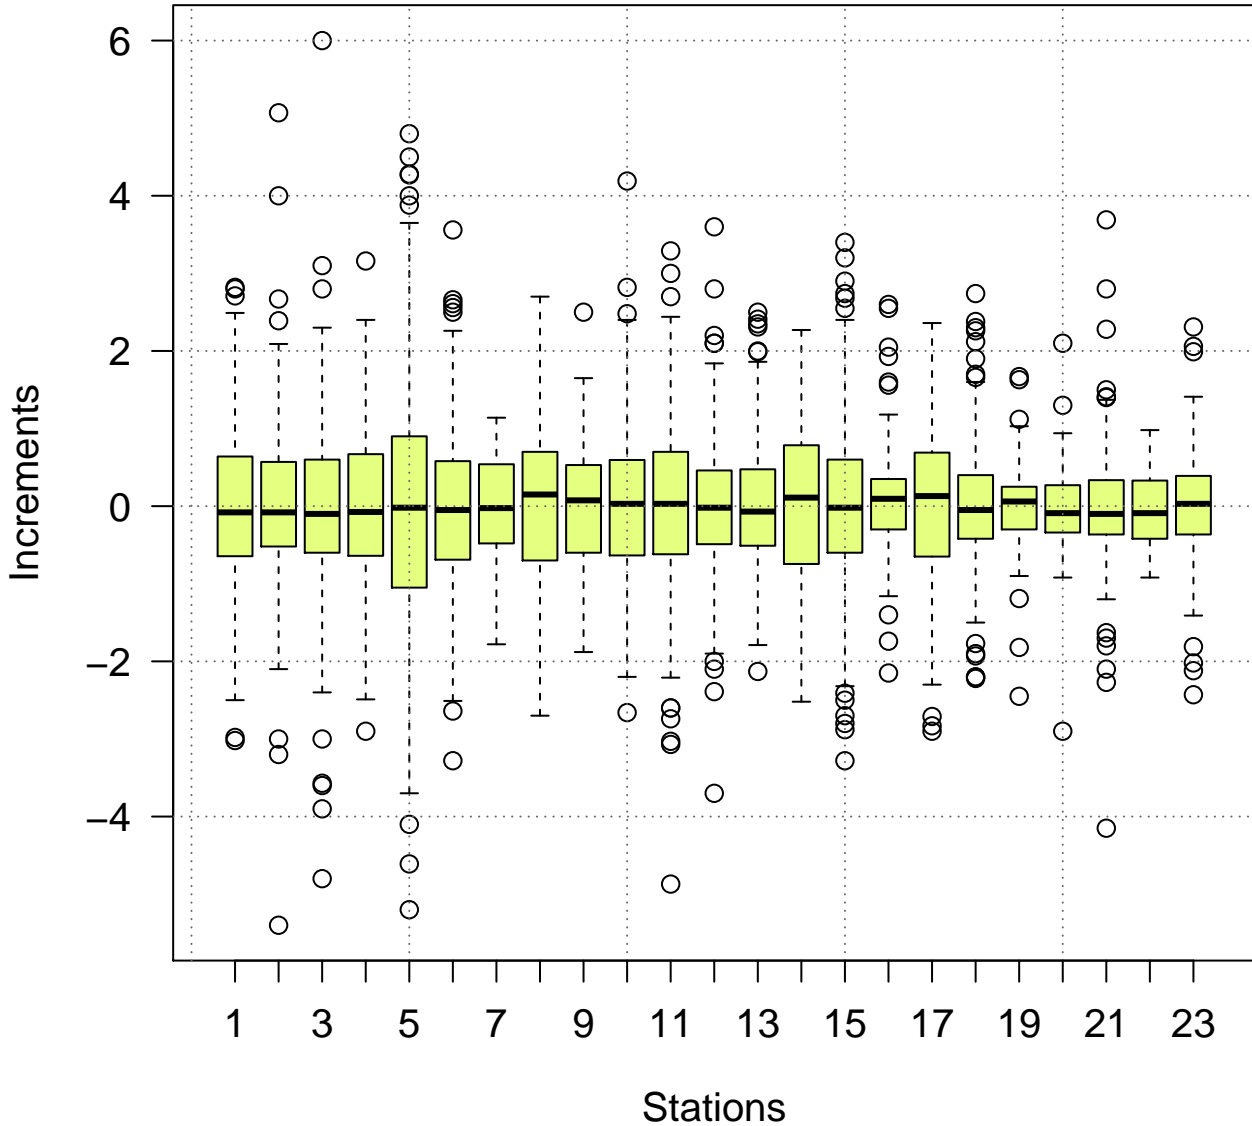

# O3 run lengths

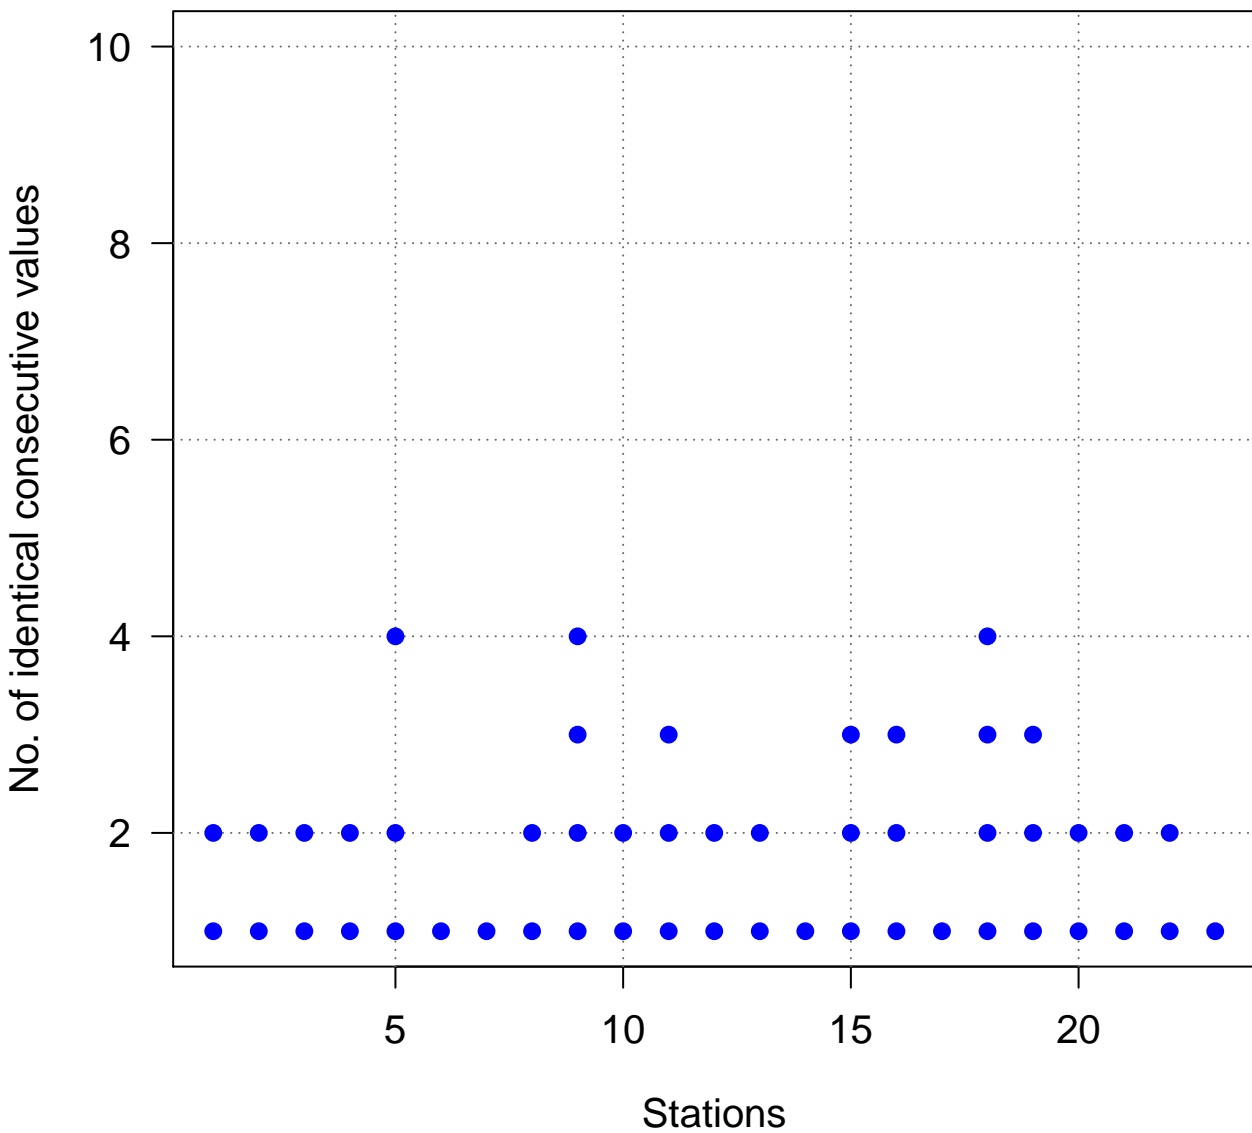

# O3 data availability

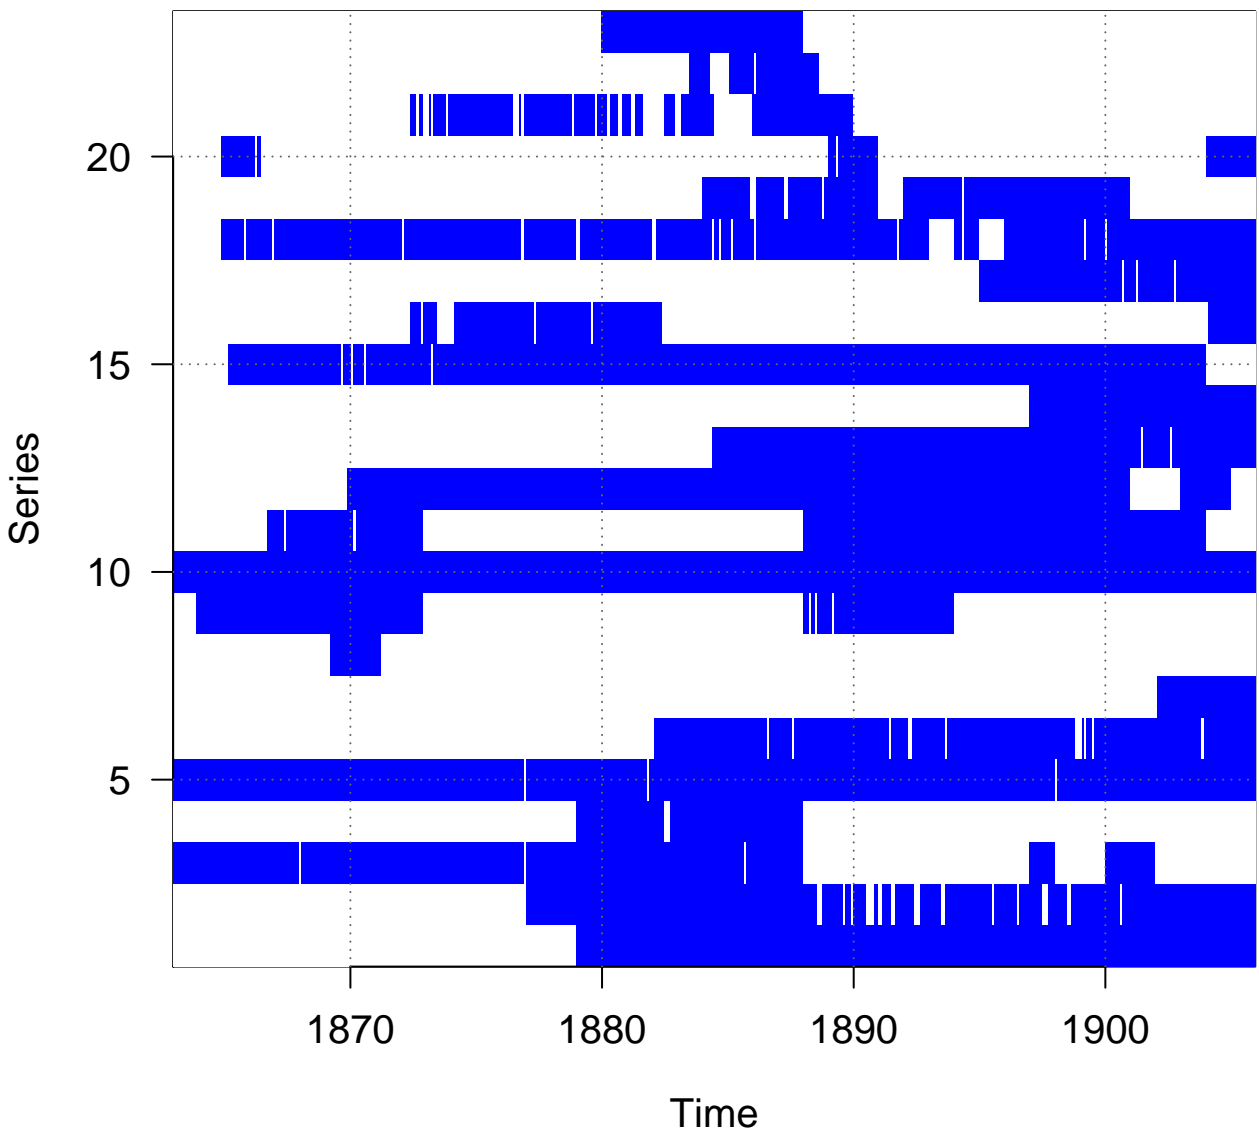

**Number of O3 data in all stations**

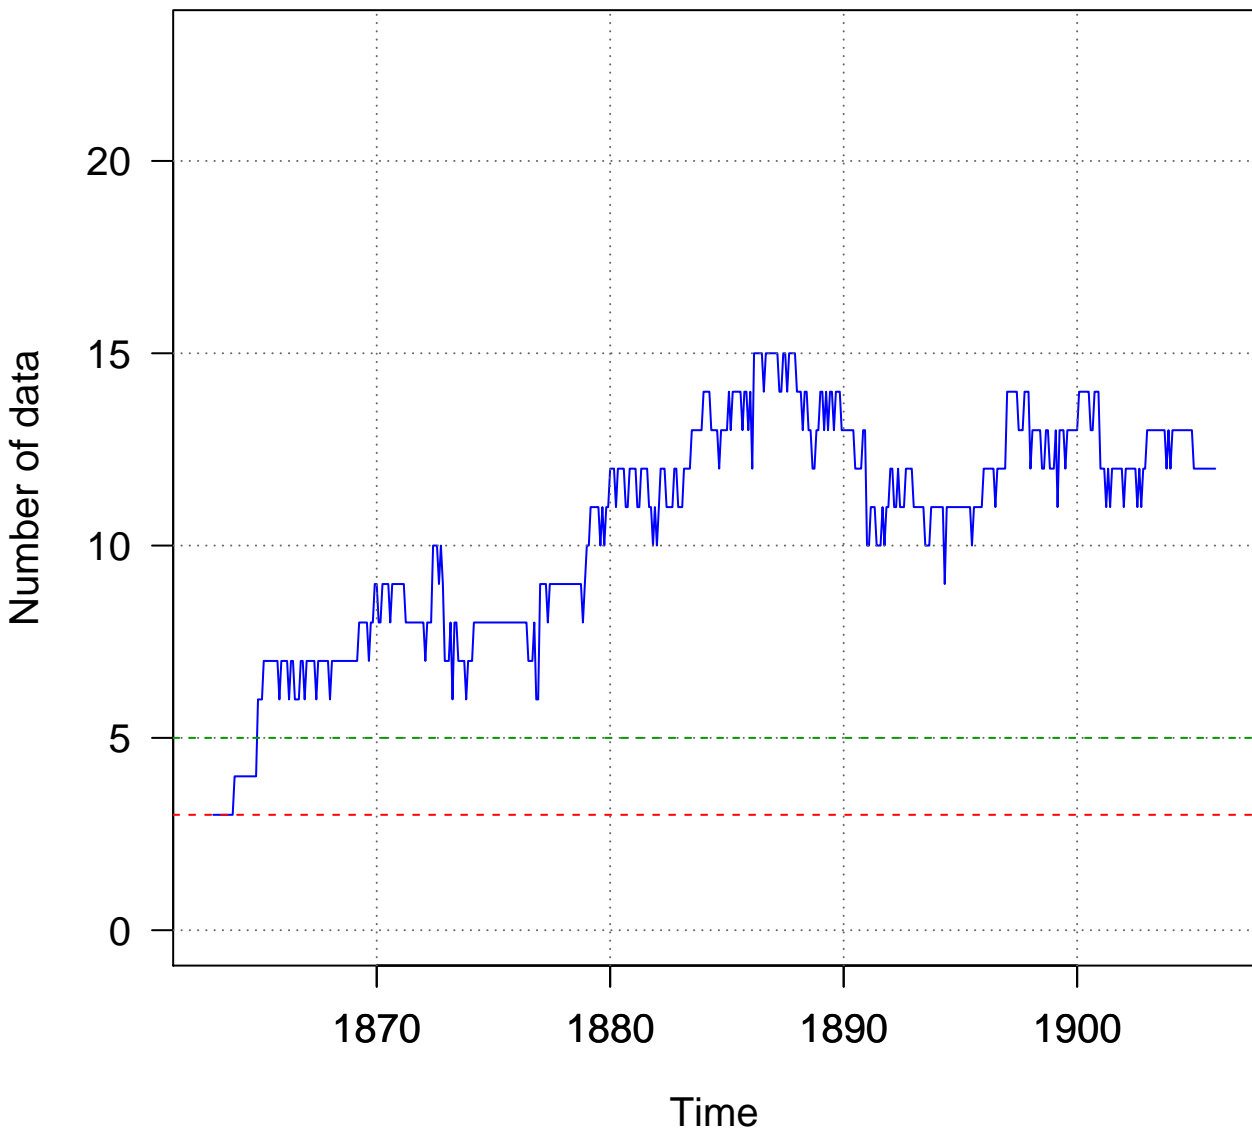

**Histogram of all data**

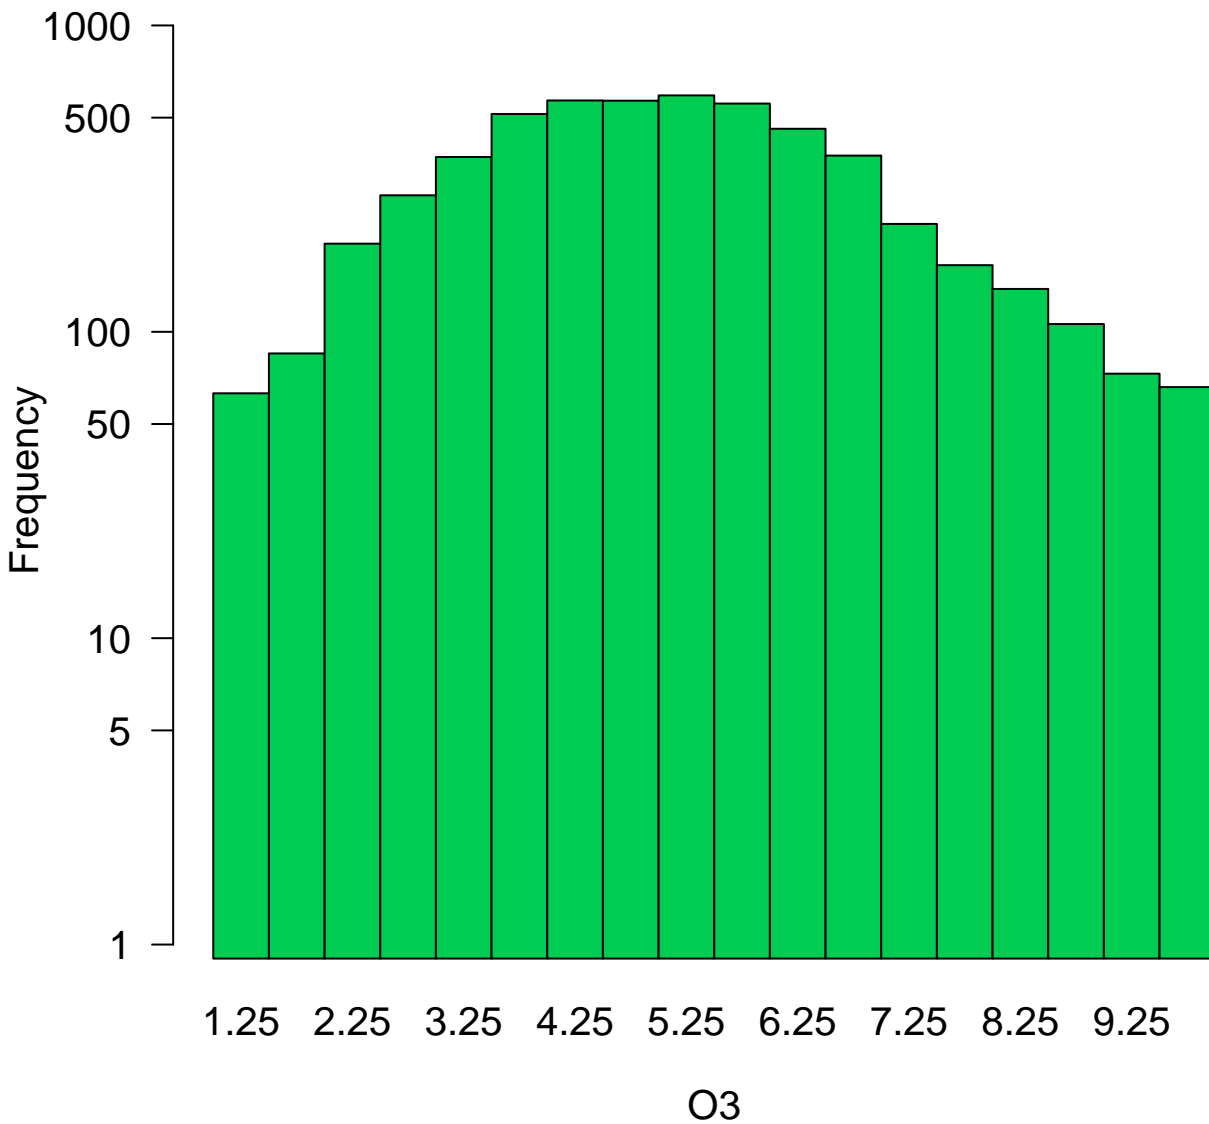

**Correlogram of first difference O3 series**

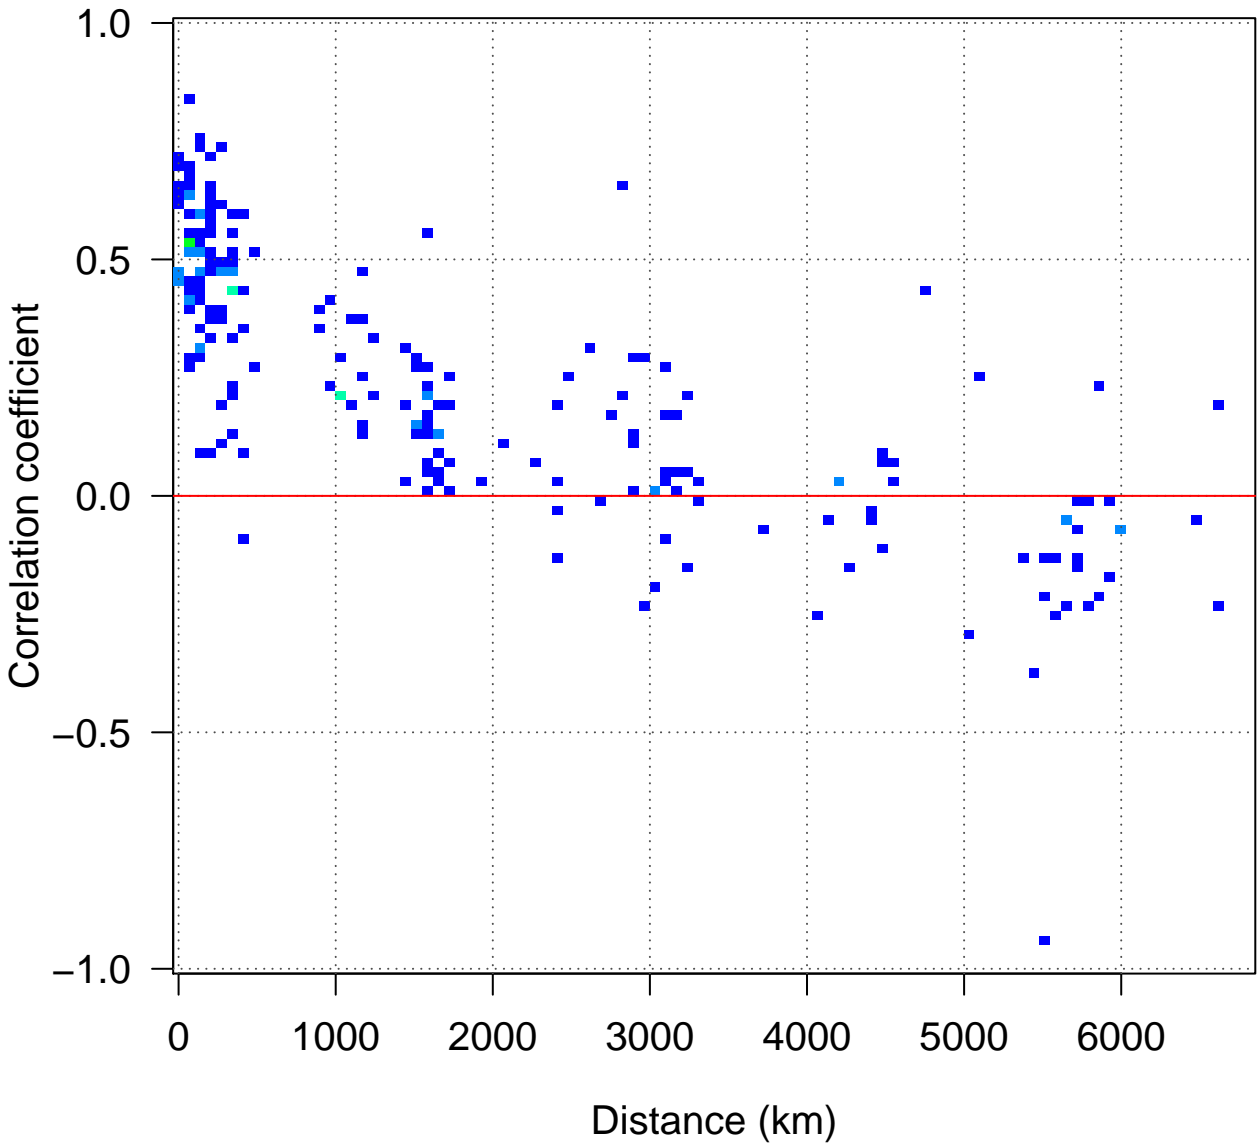



**Dendrogram of station clusters**

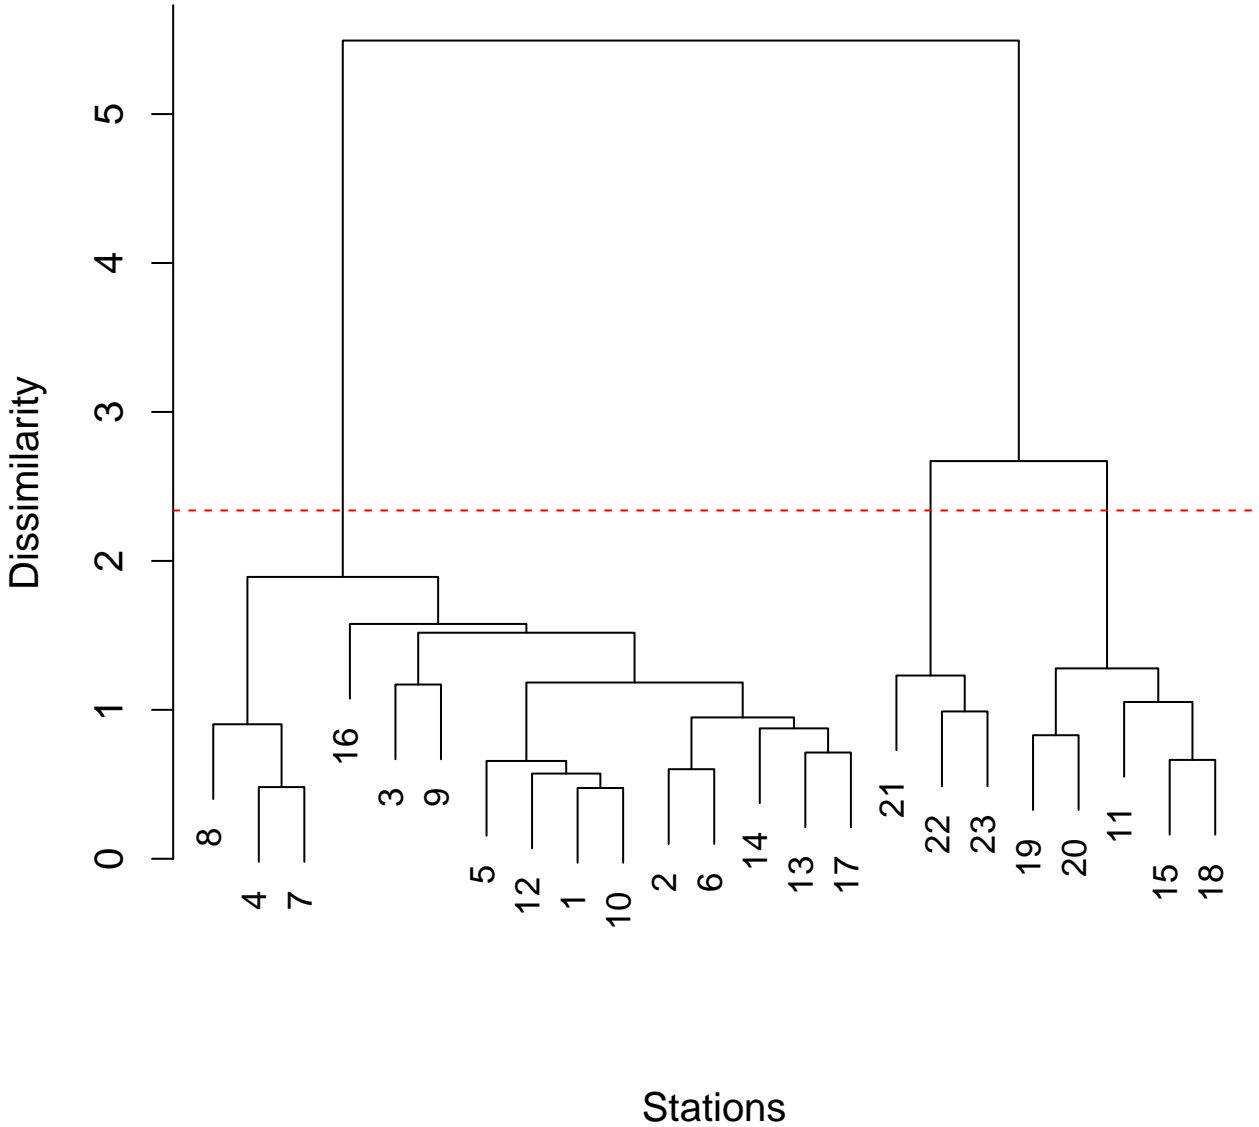

# O3 station locations (3 clusters)

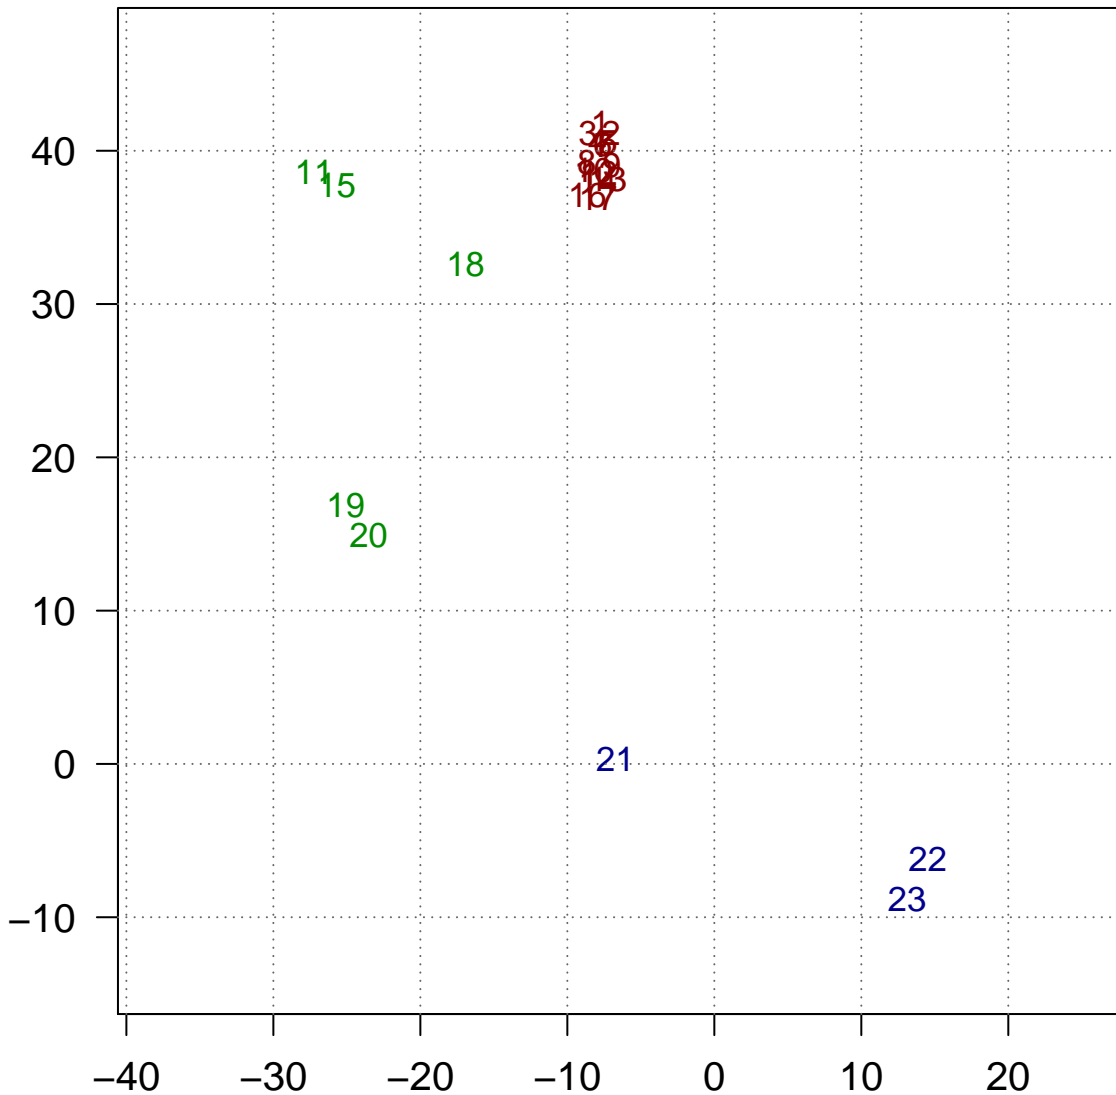

# Stage 1

Binary splits on 60 term  
stepped windows with  
std=3, SNHT>25  
and wd=1000 km

# O3 3 (Porto) Porto

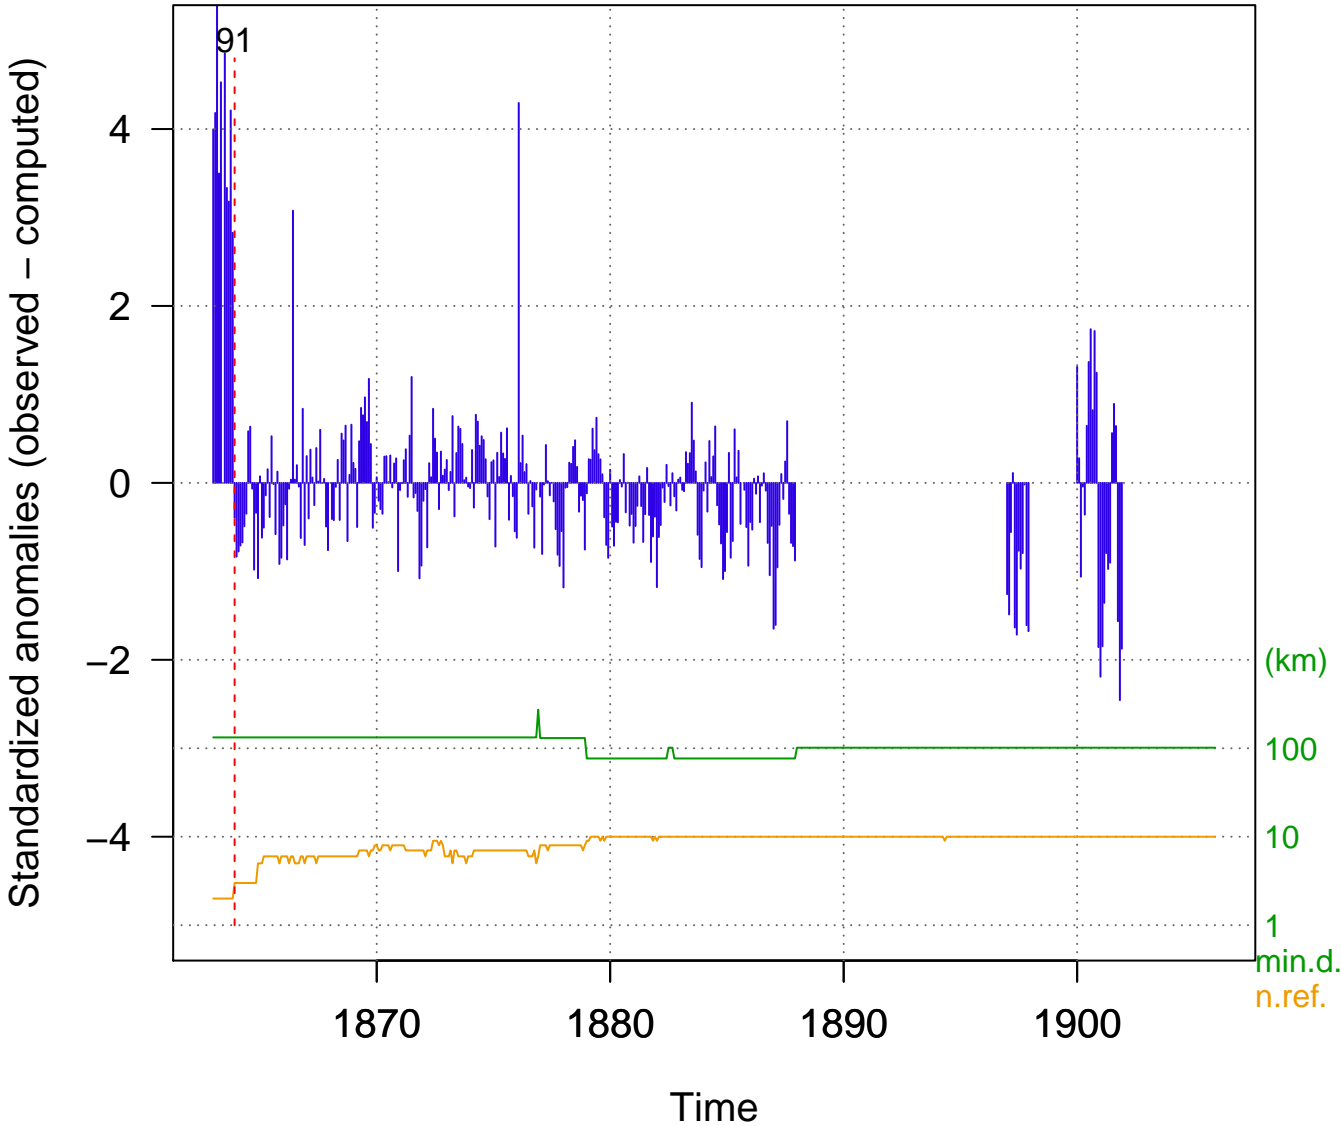

# O3 2 (Moncorvo) Moncorvo

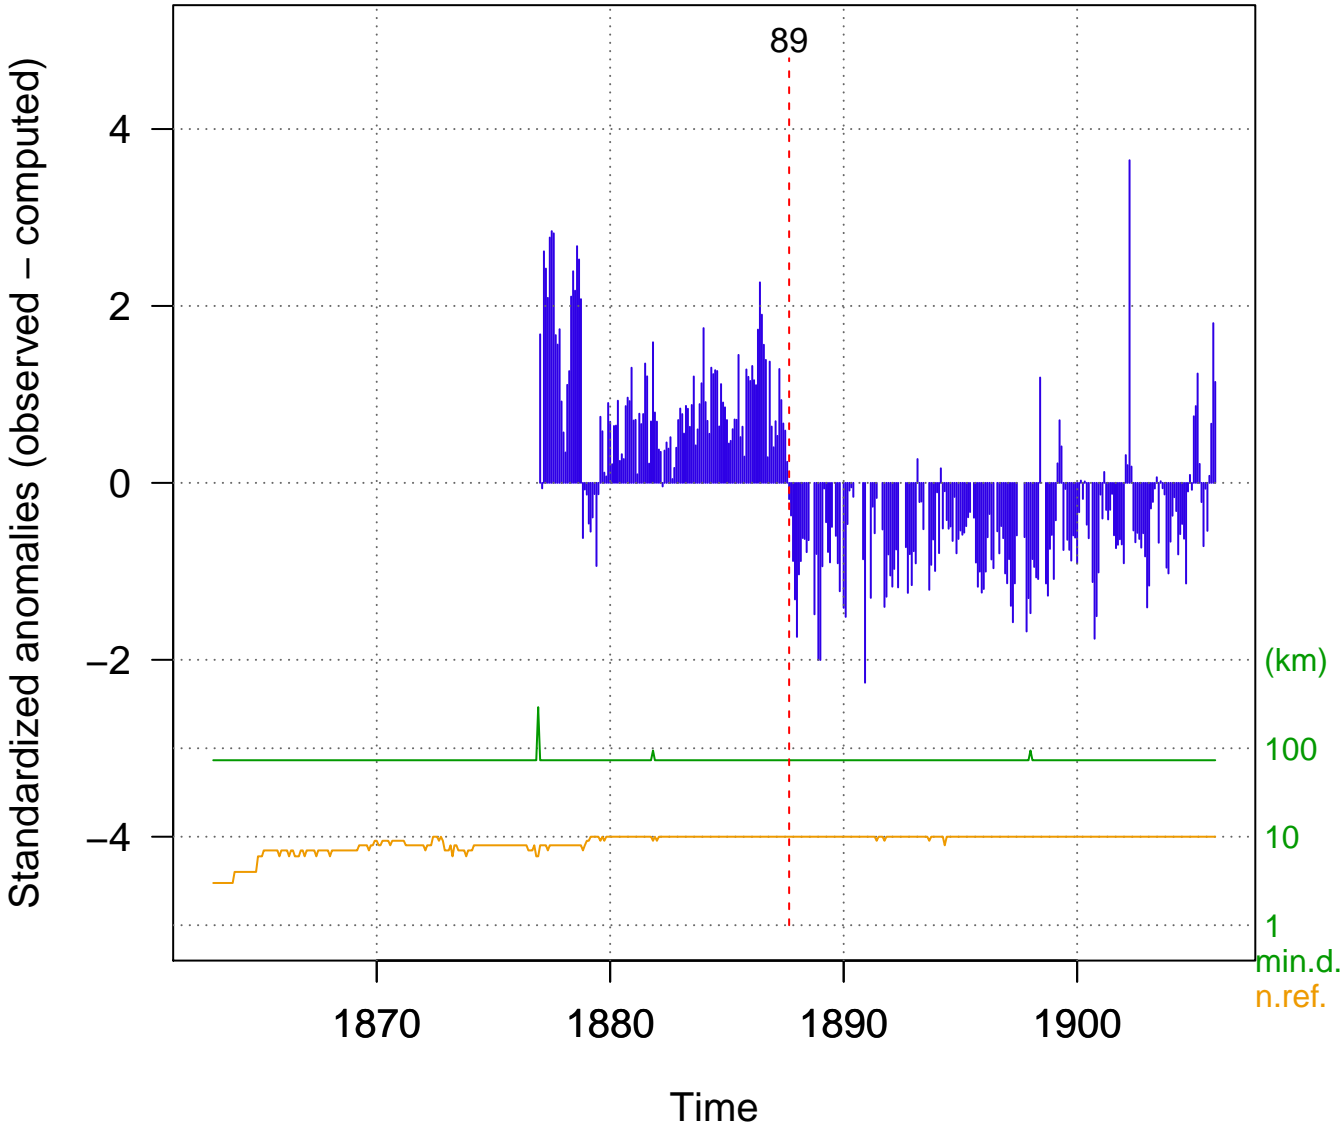

# O3 15 (Ponta\_Delgada) Ponta Delgada

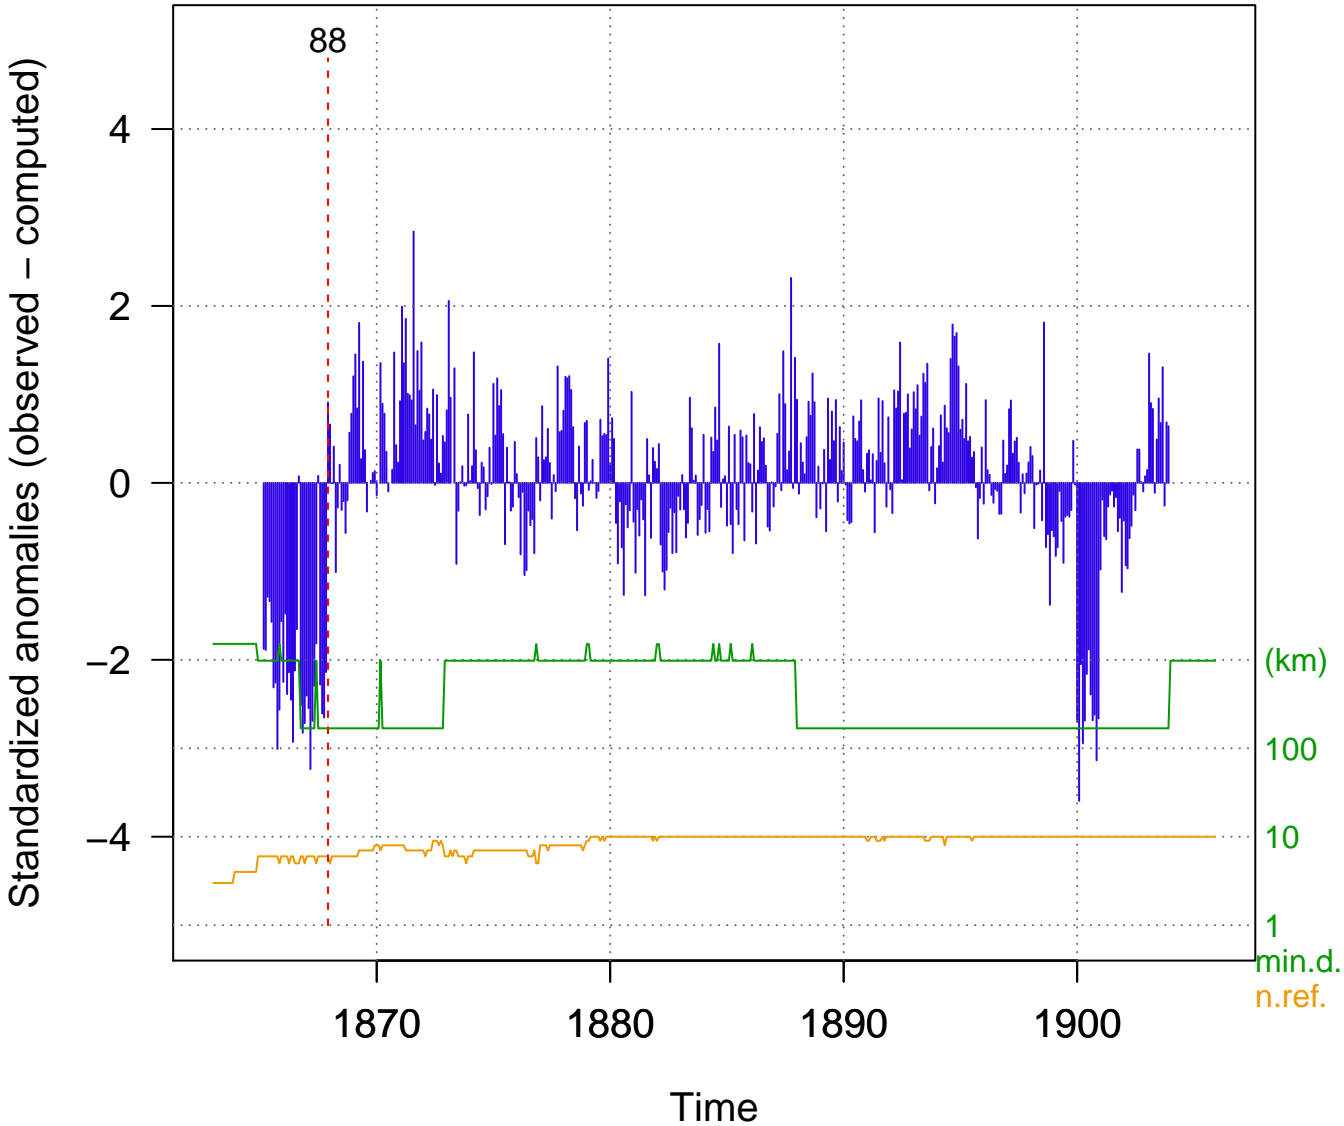

# O3 5 (Guarda) Guarda

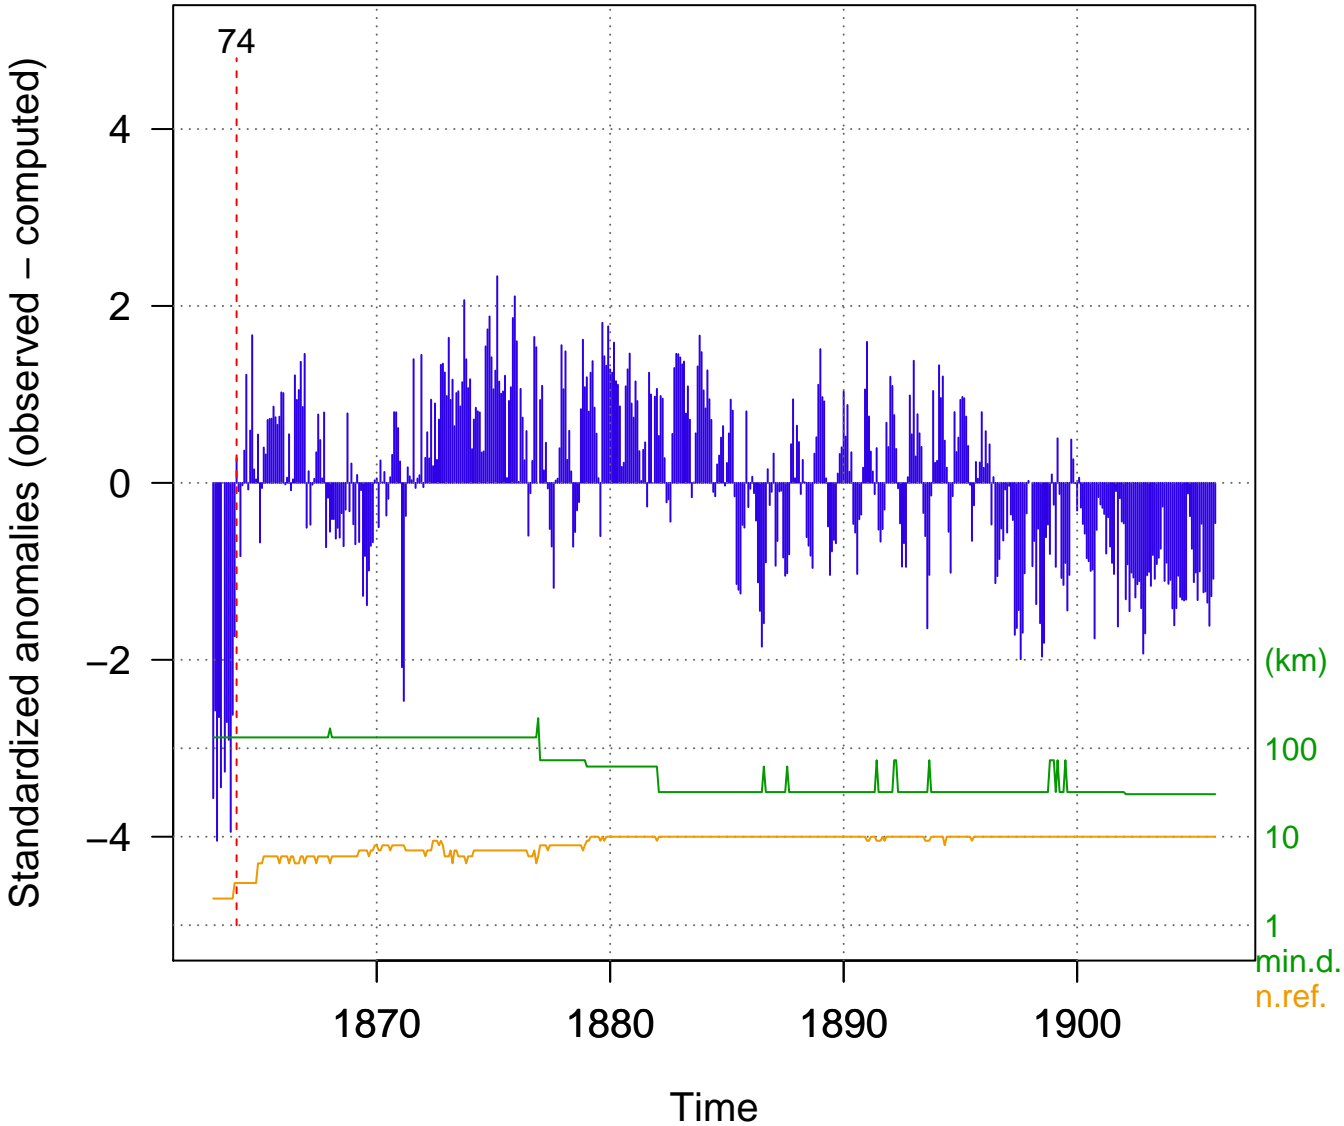

**O3 10 (Infante\_D\_Luiz)**  
**Lisbon Infante D. Luiz**

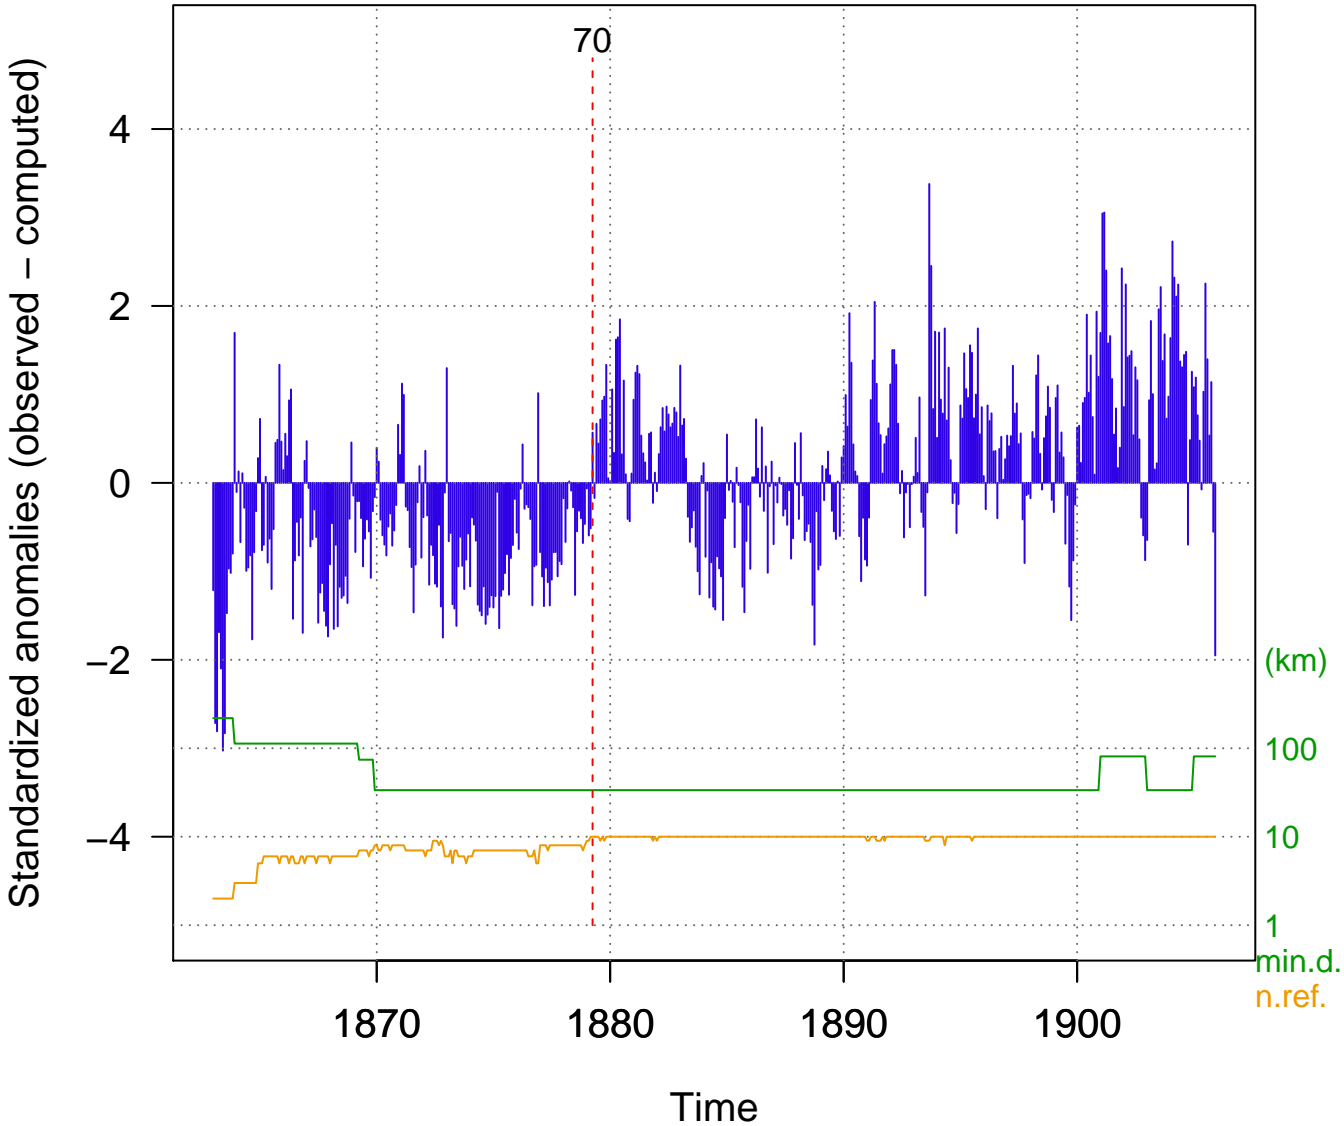



# O3 1 (Montalegre) Montalegre

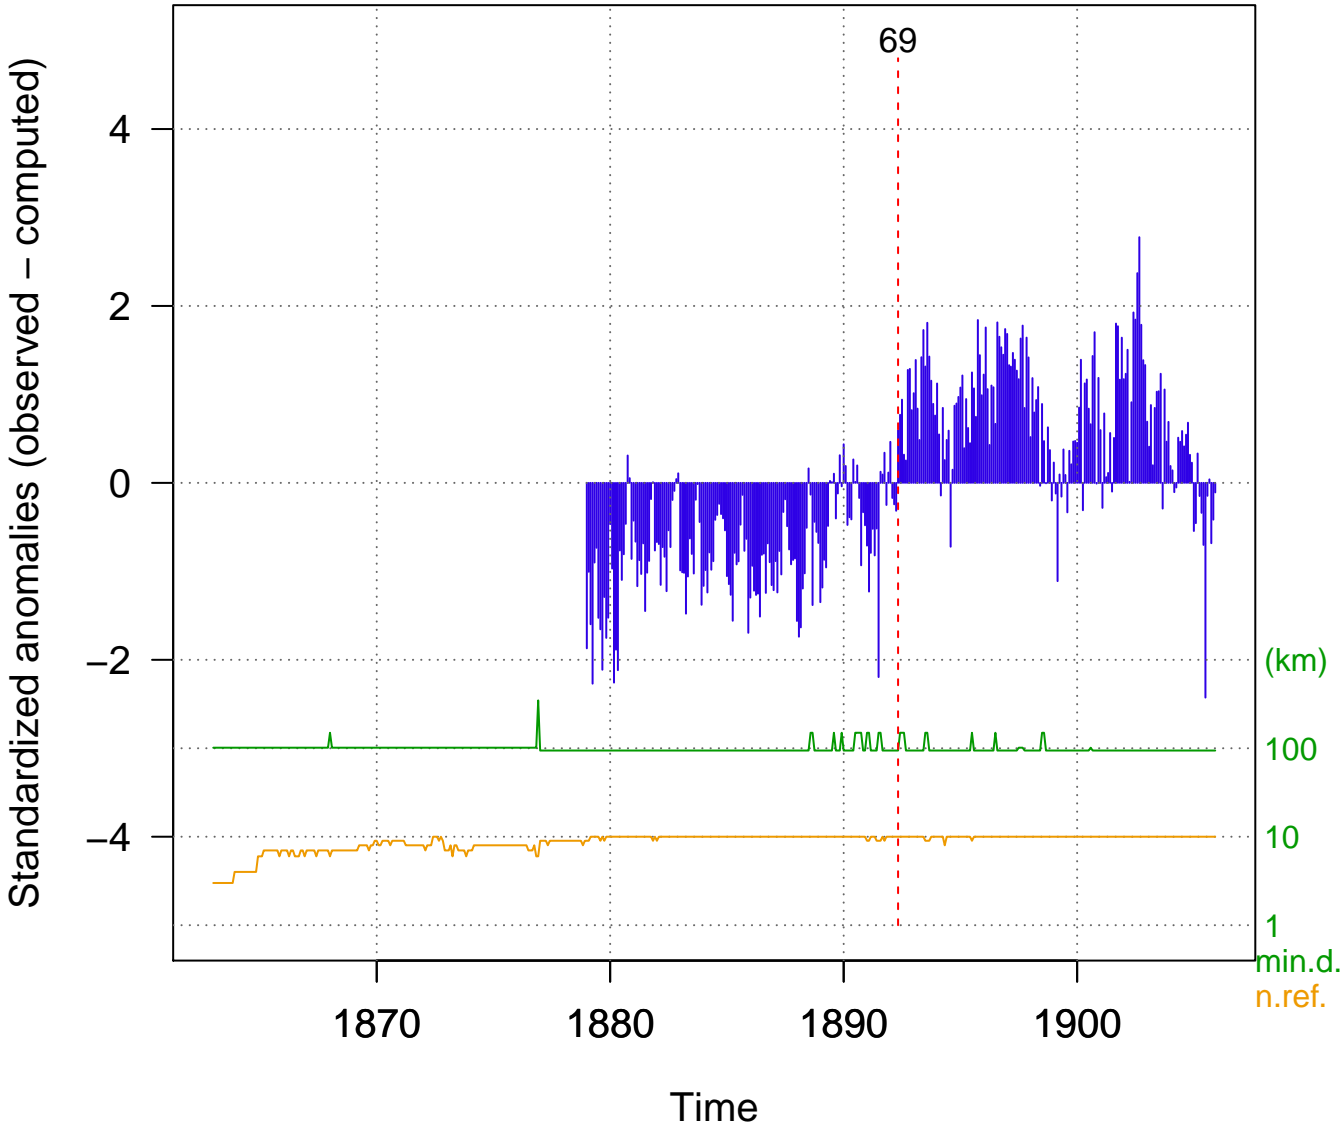

# O3 12 (Evora) Evora

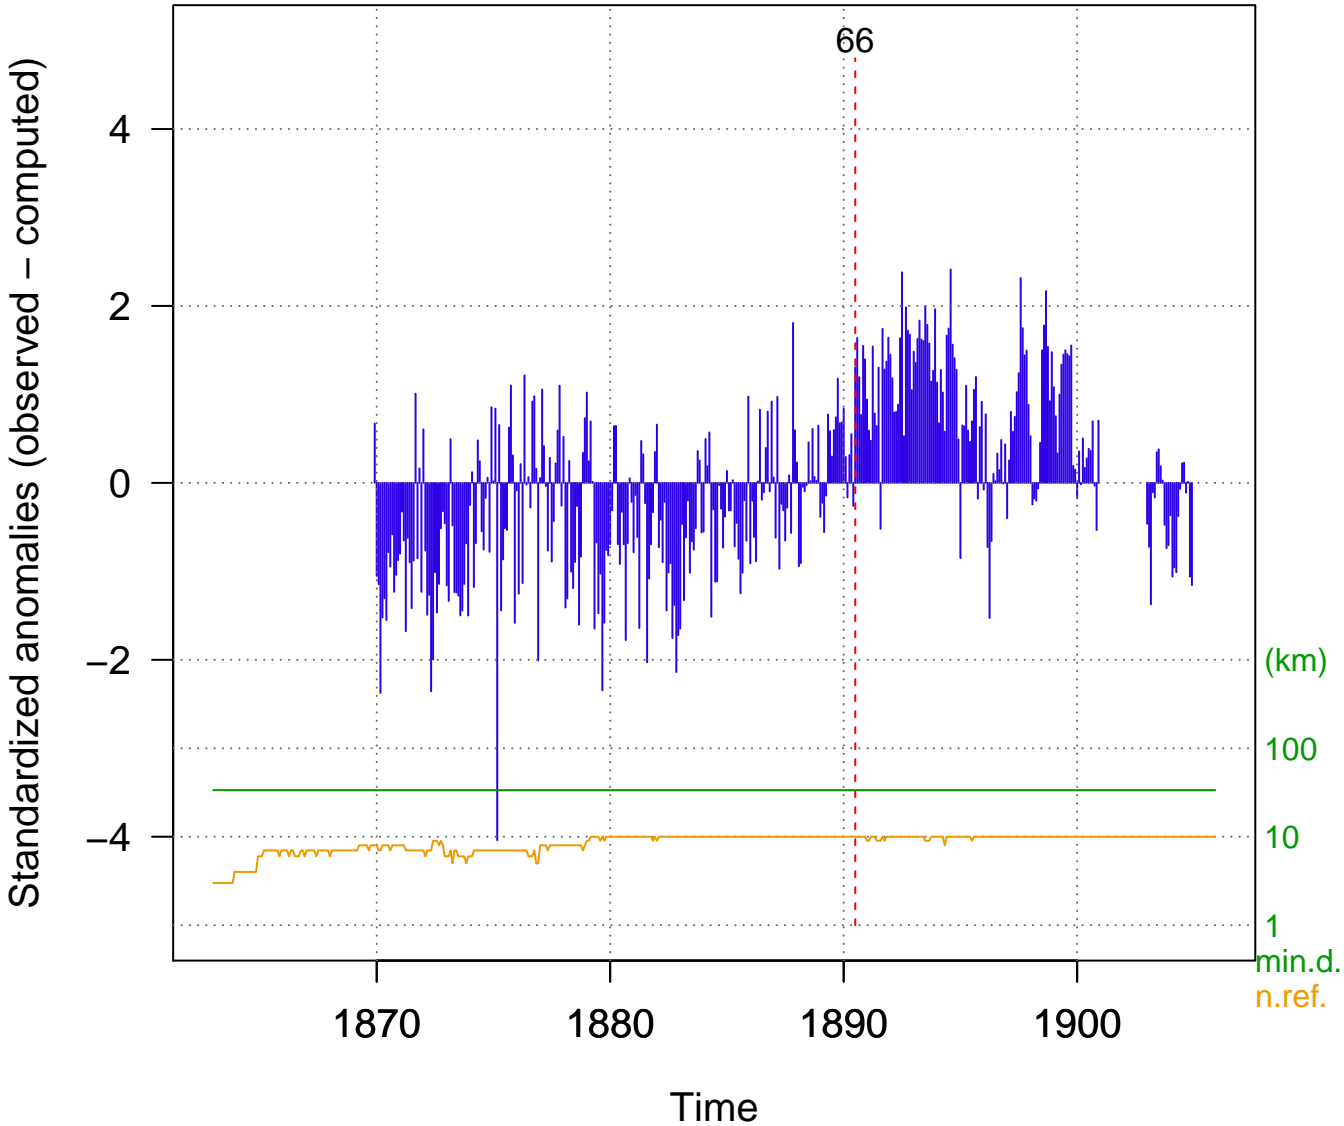

# O3 16 (Lagos) Lagos

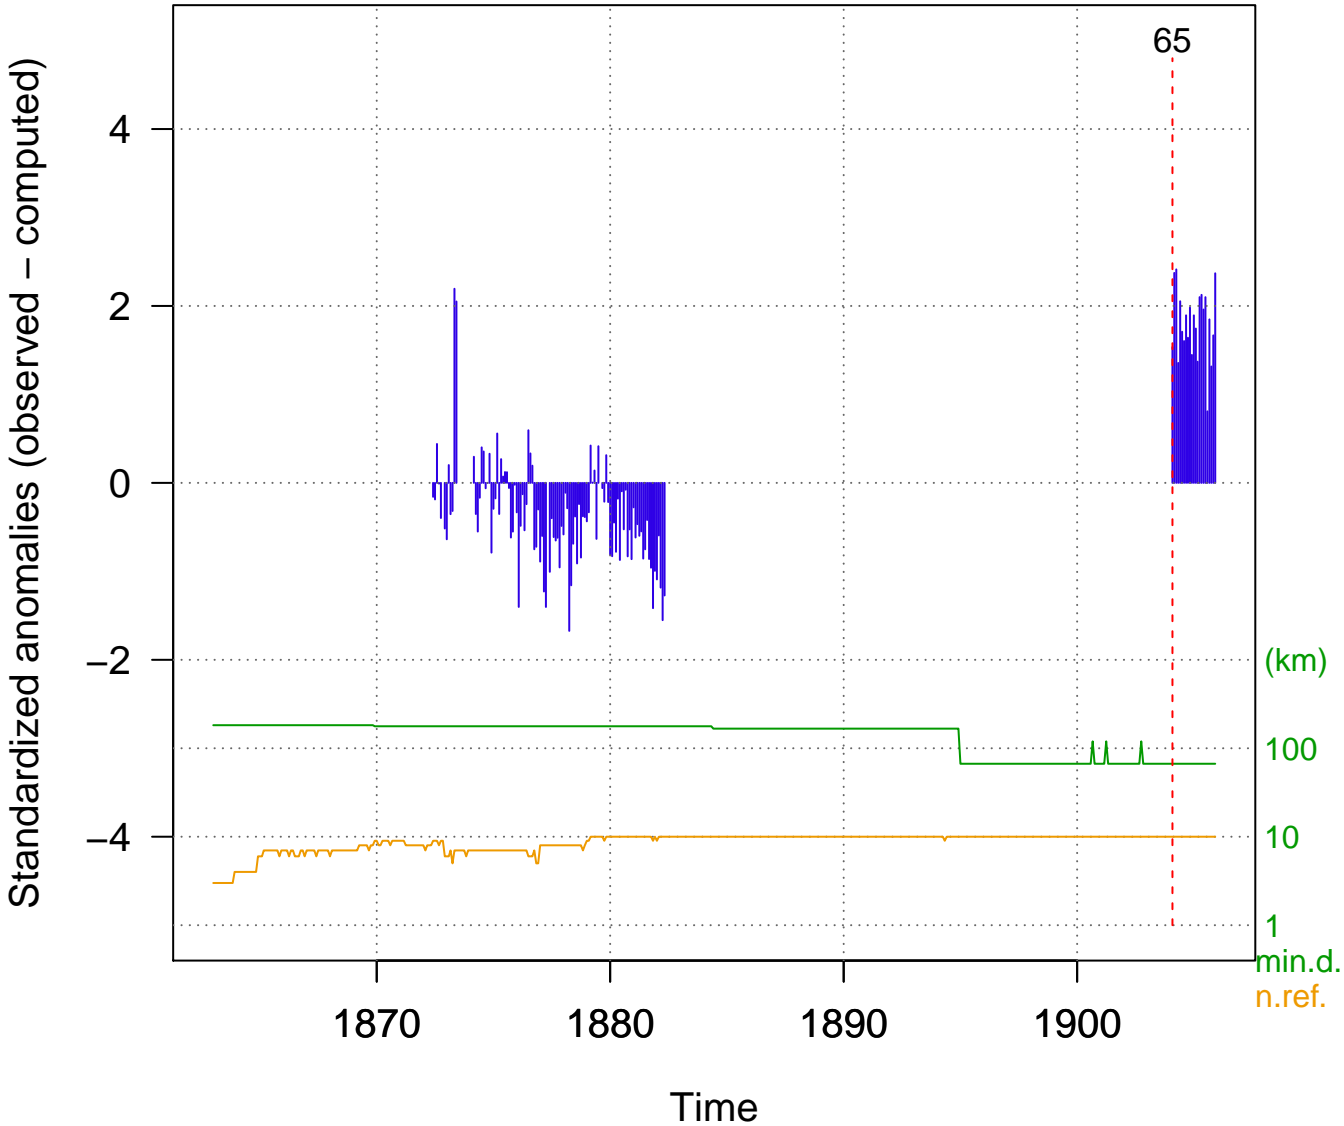

**O3 21 (S.\_Thome)**  
**S. Thome**

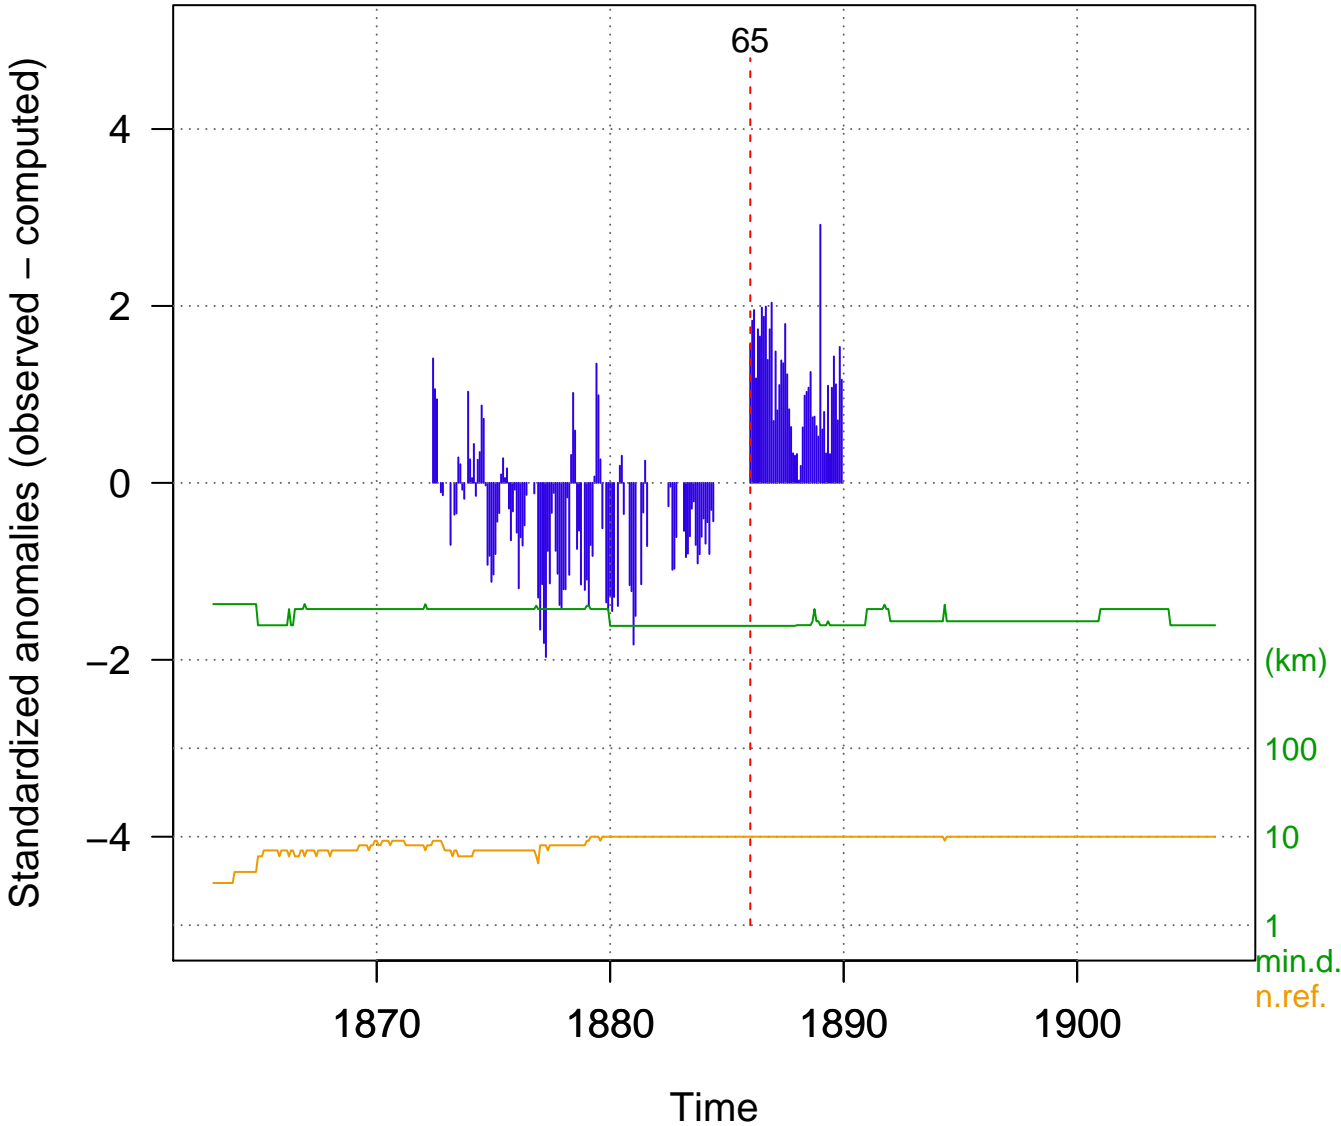

# O3 13 (Villa\_Fernando) Villa Fernando

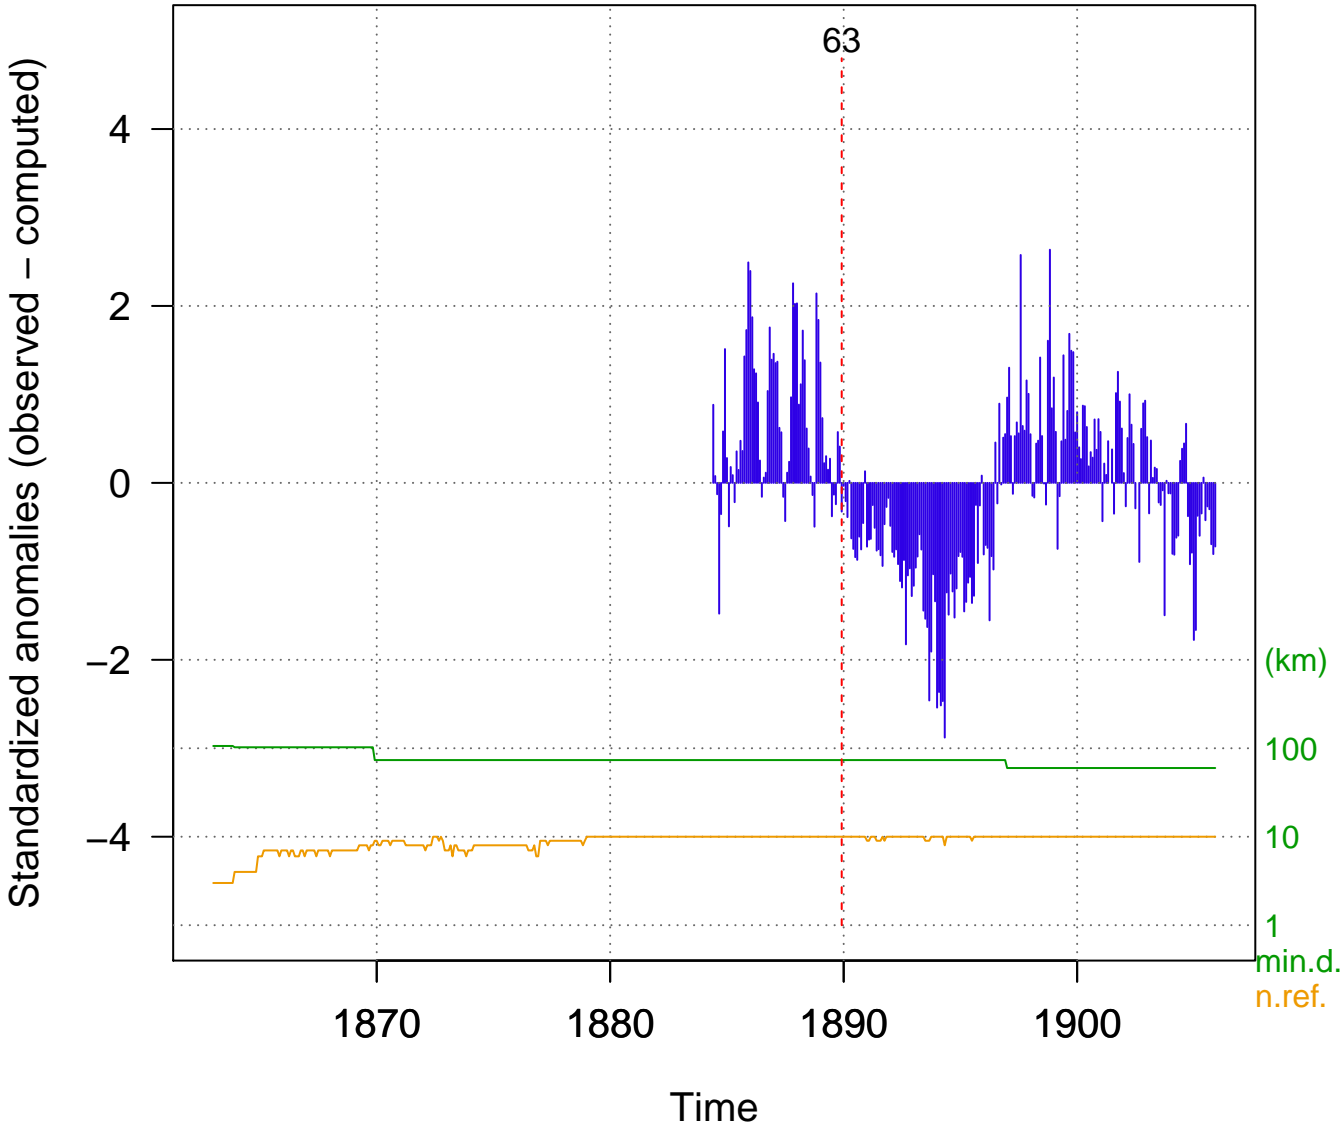

# O3 13 (Villa\_Fernando) Villa Fernando

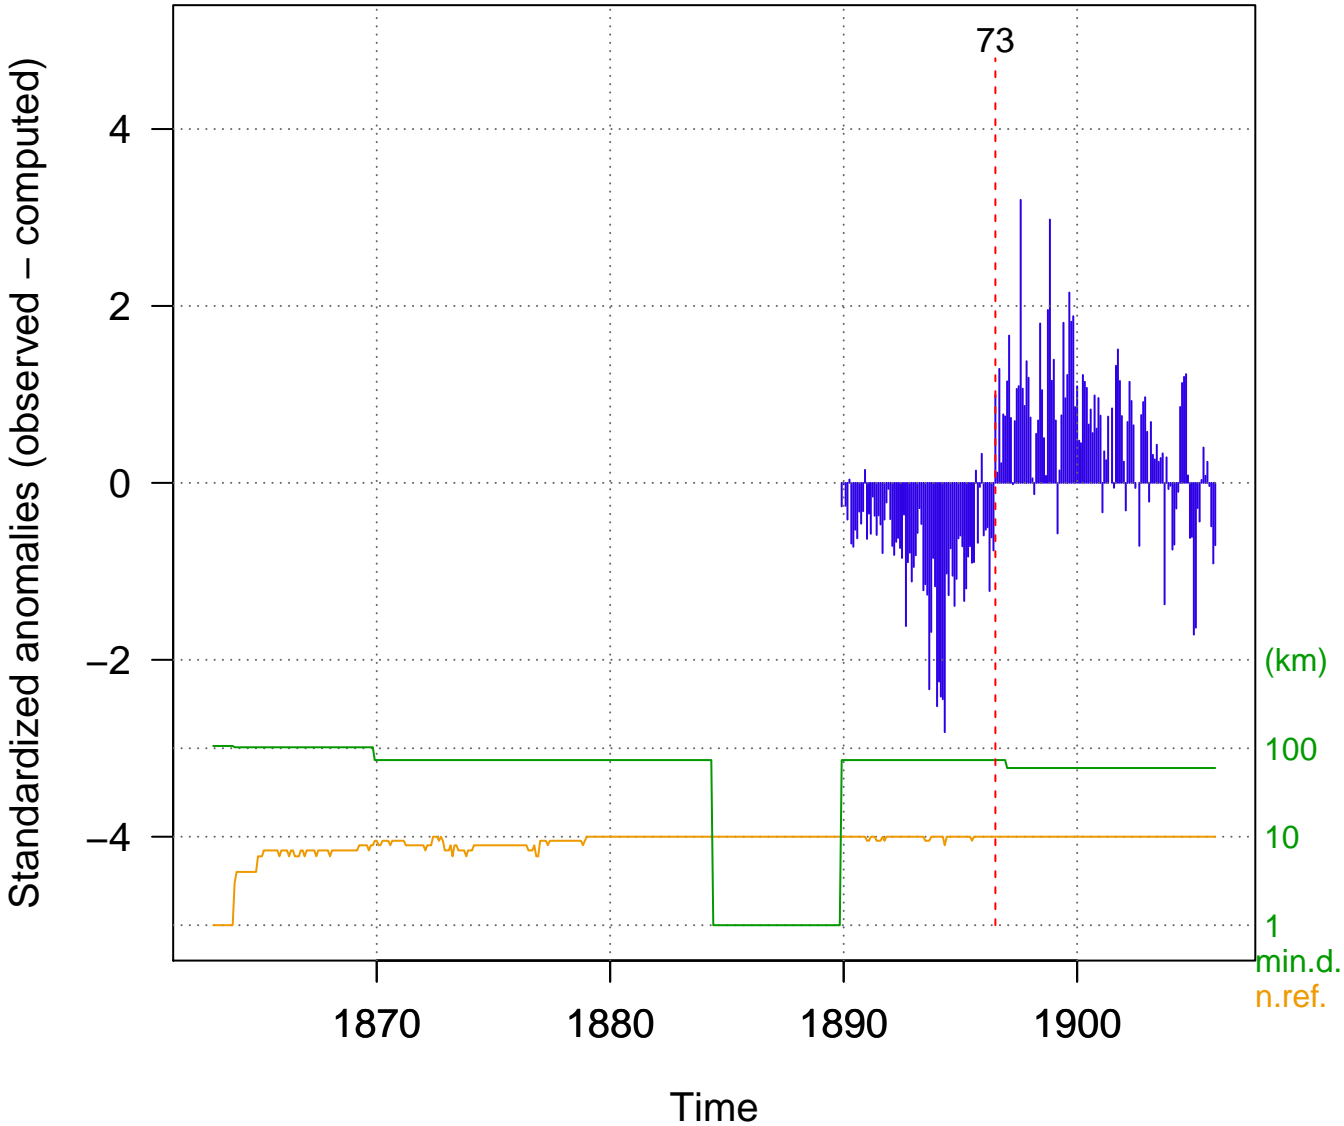

# O3 5 (Guarda) Guarda

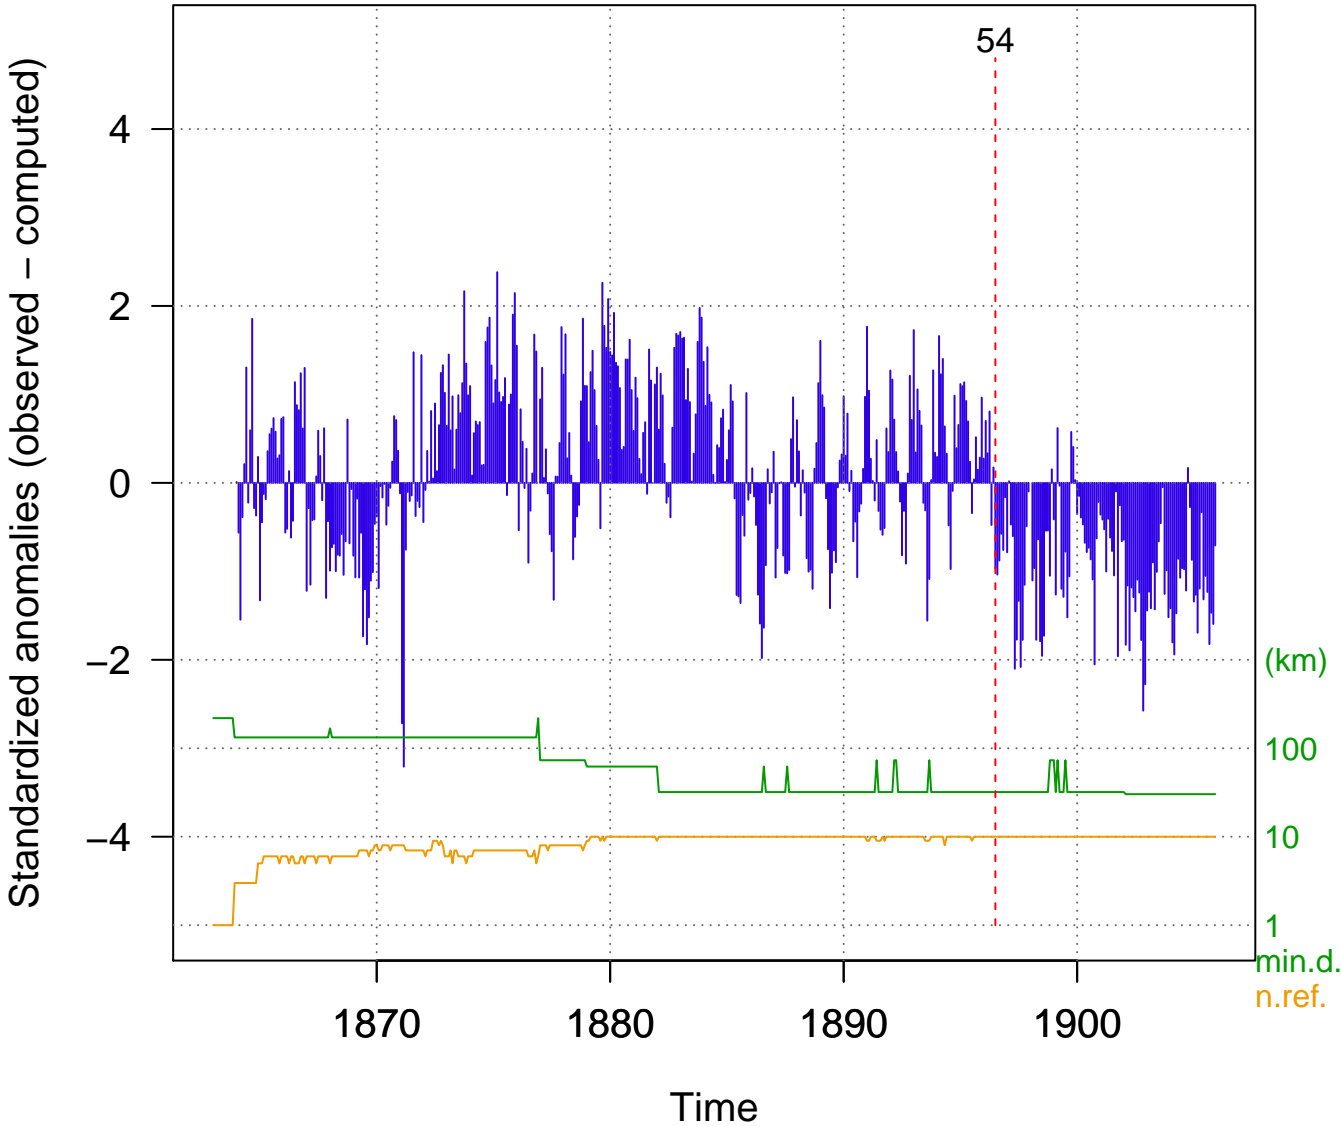

**O3 10 (Infante\_D\_Luiz)**  
**Lisbon Infante D. Luiz**

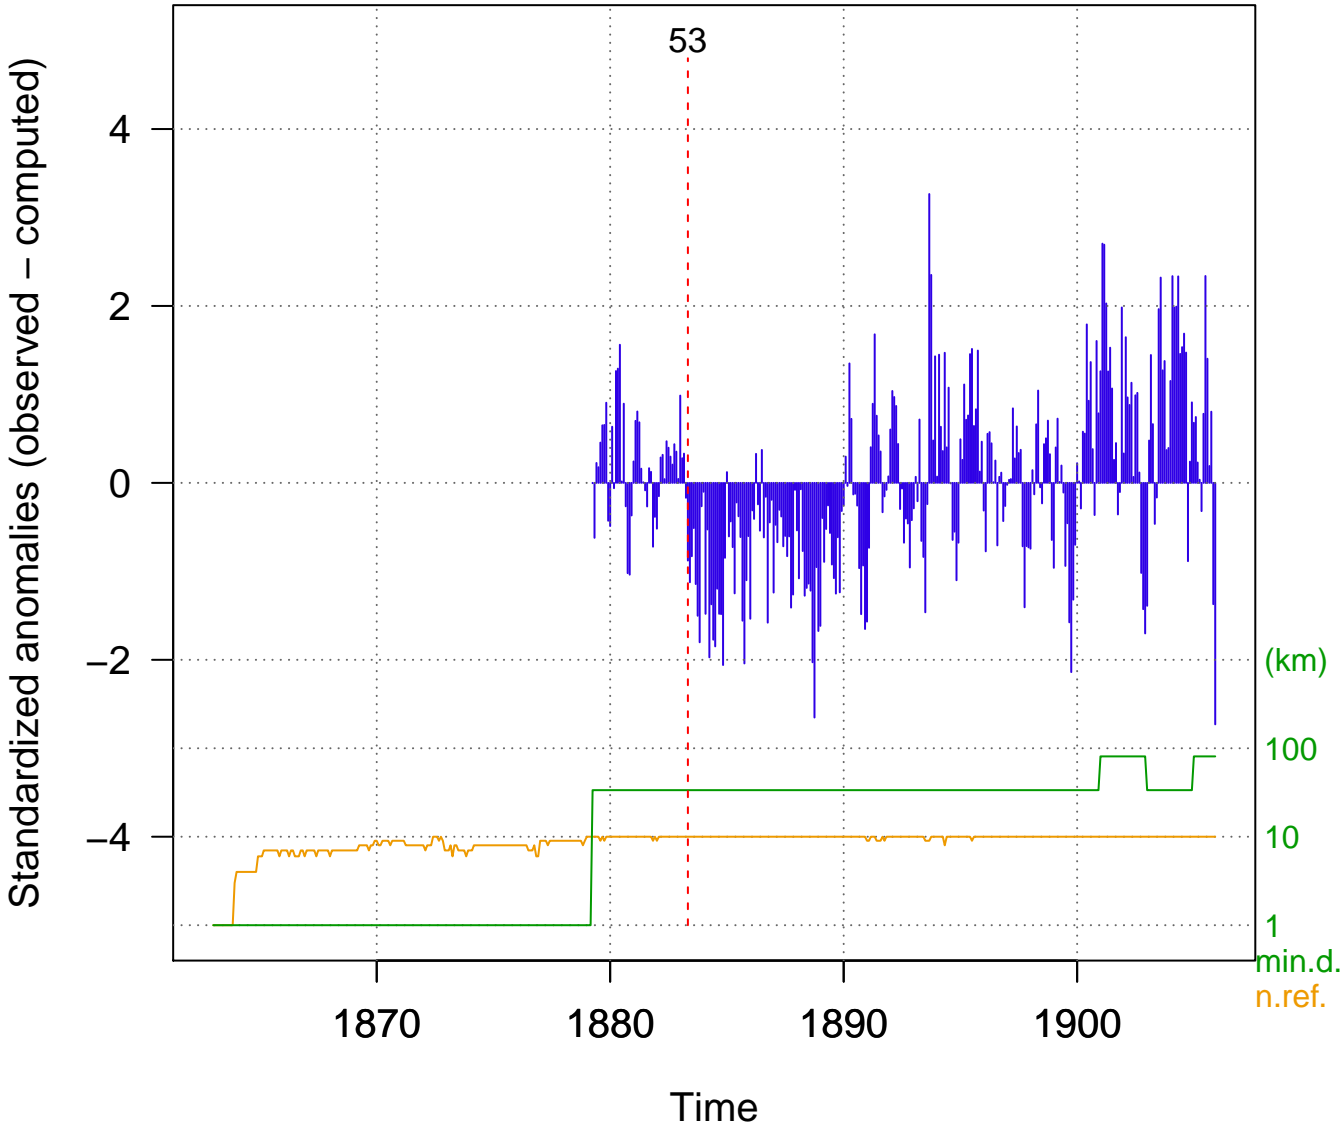



# O3 18 (Funchal) Funchal

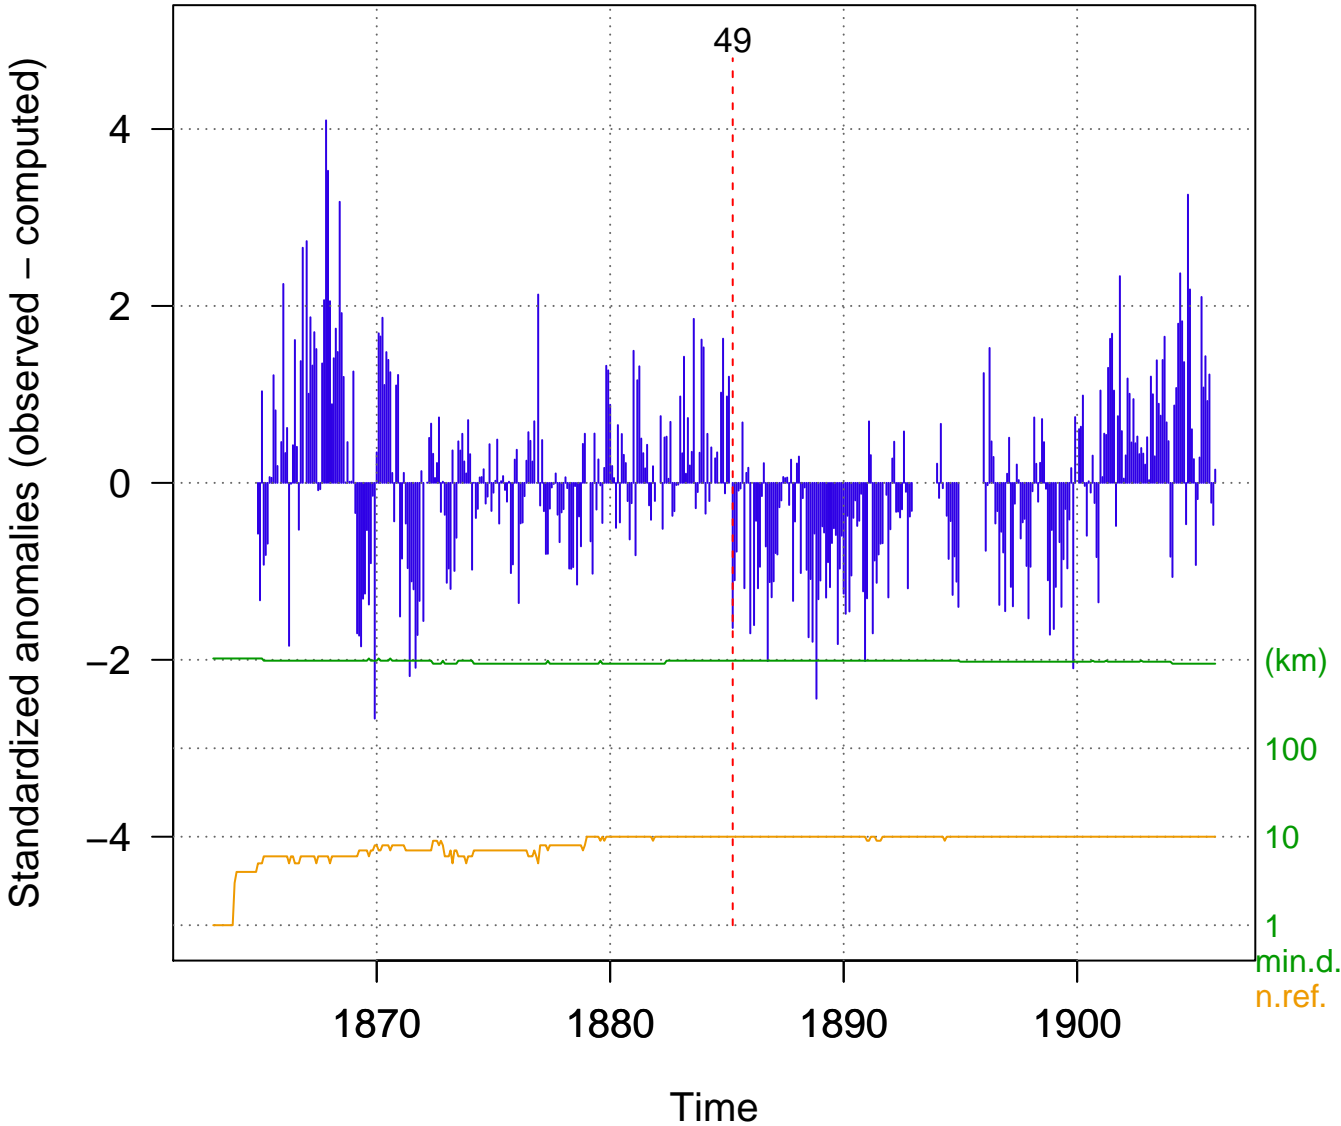

# O3 33 (Guarda-2) Guarda-2

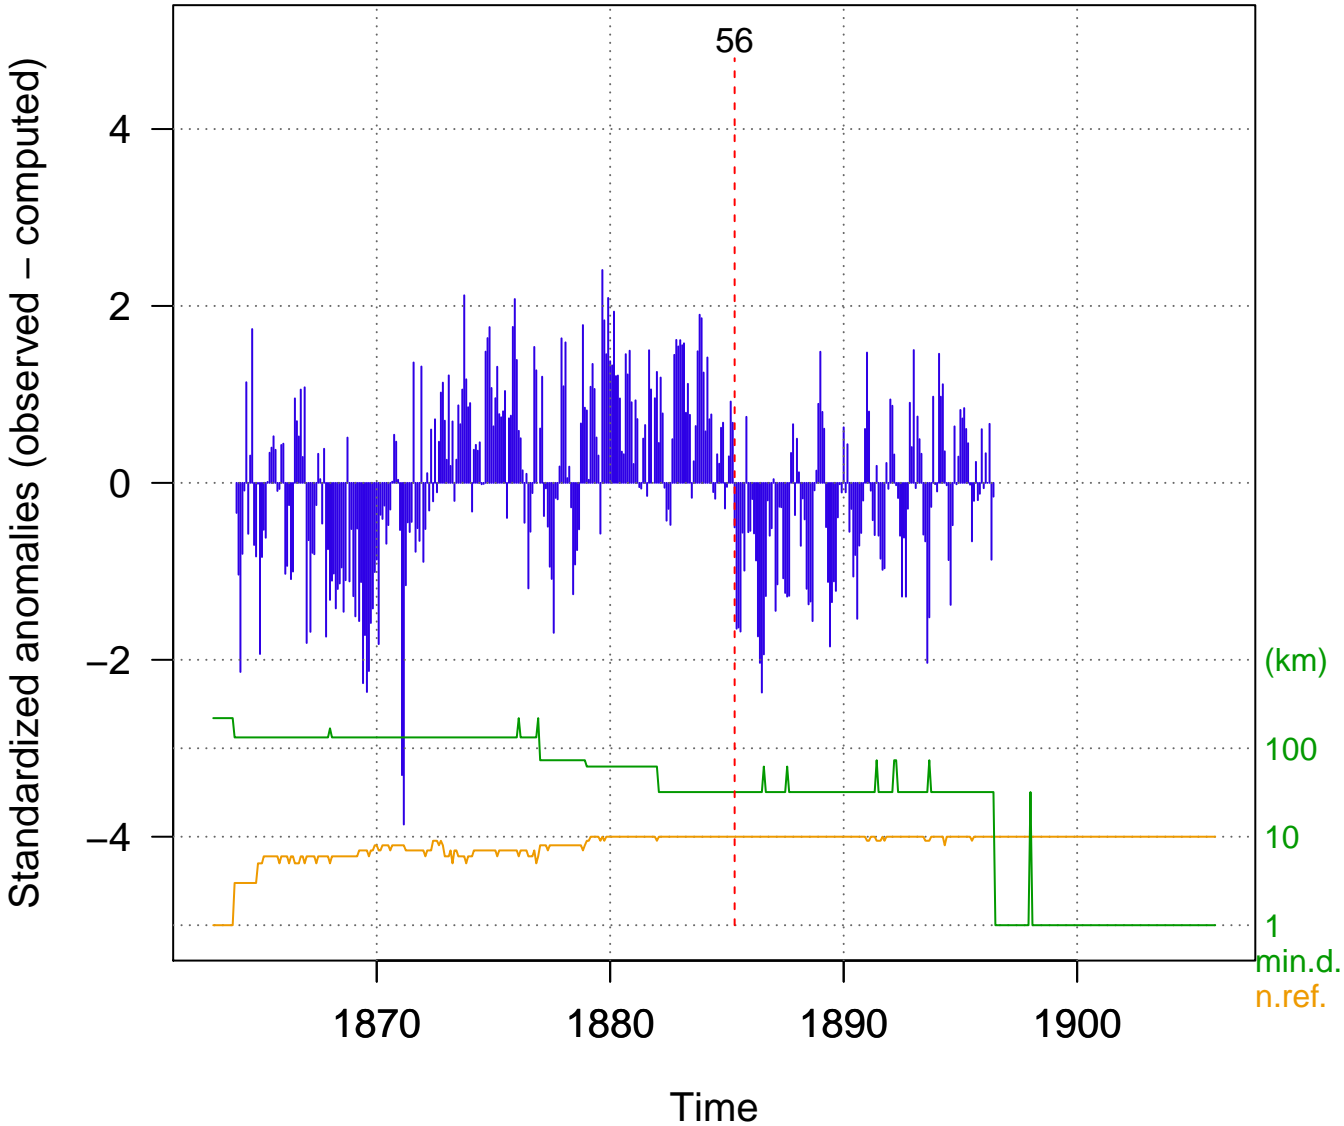

# O3 15 (Ponta\_Delgada) Ponta Delgada

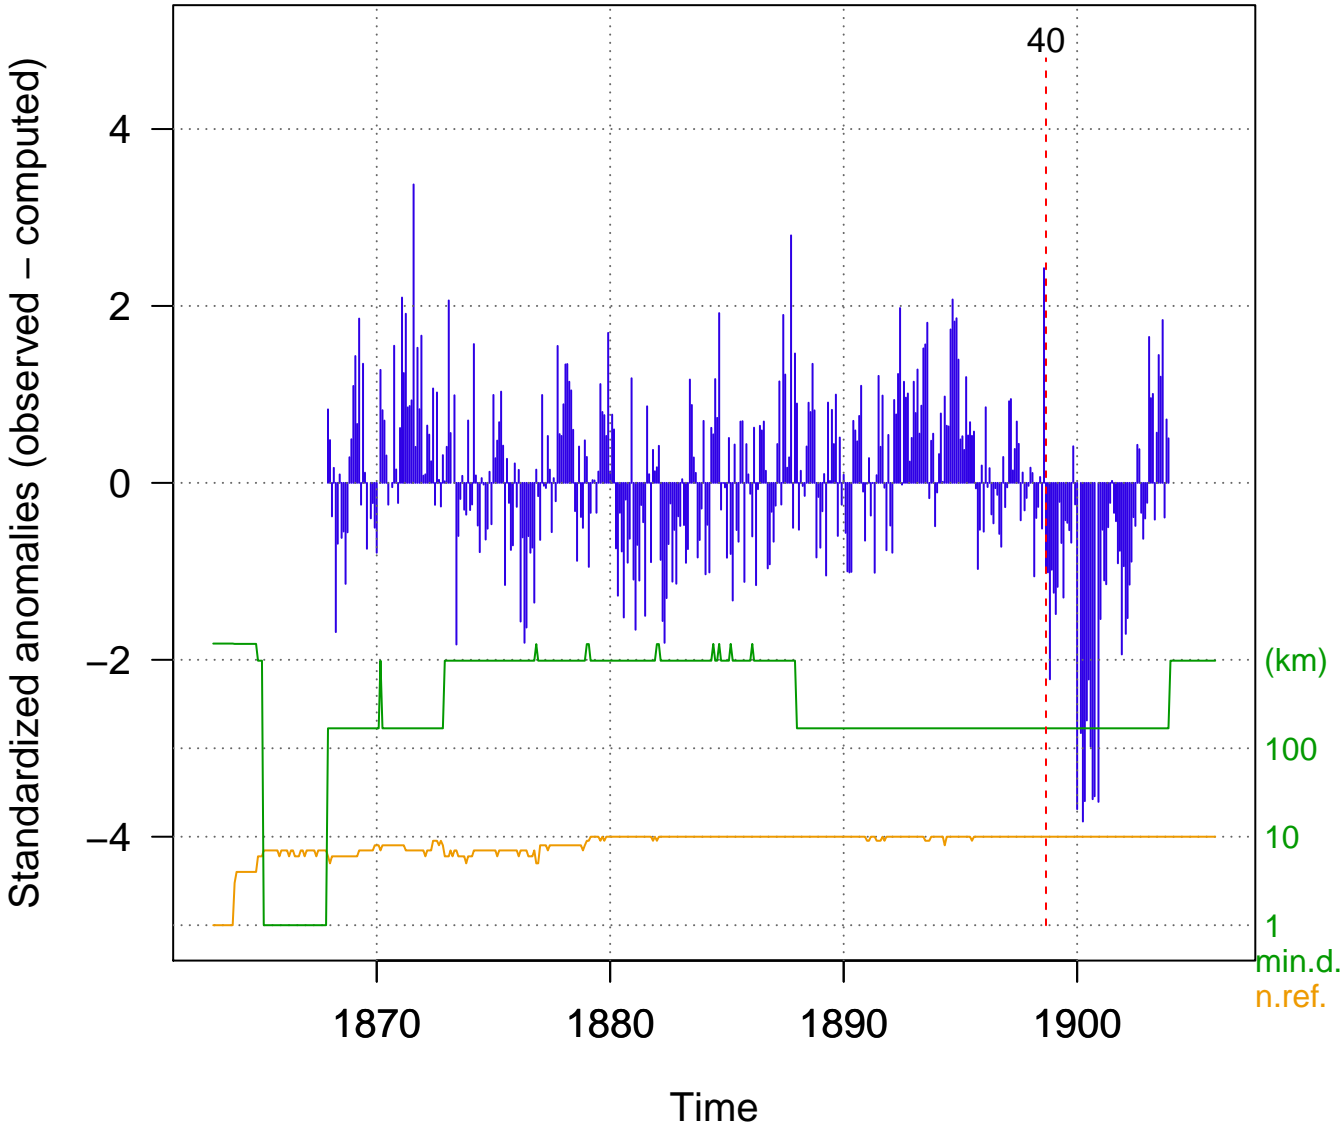

# O3 9 (Campo\_Maior) Campo Maior

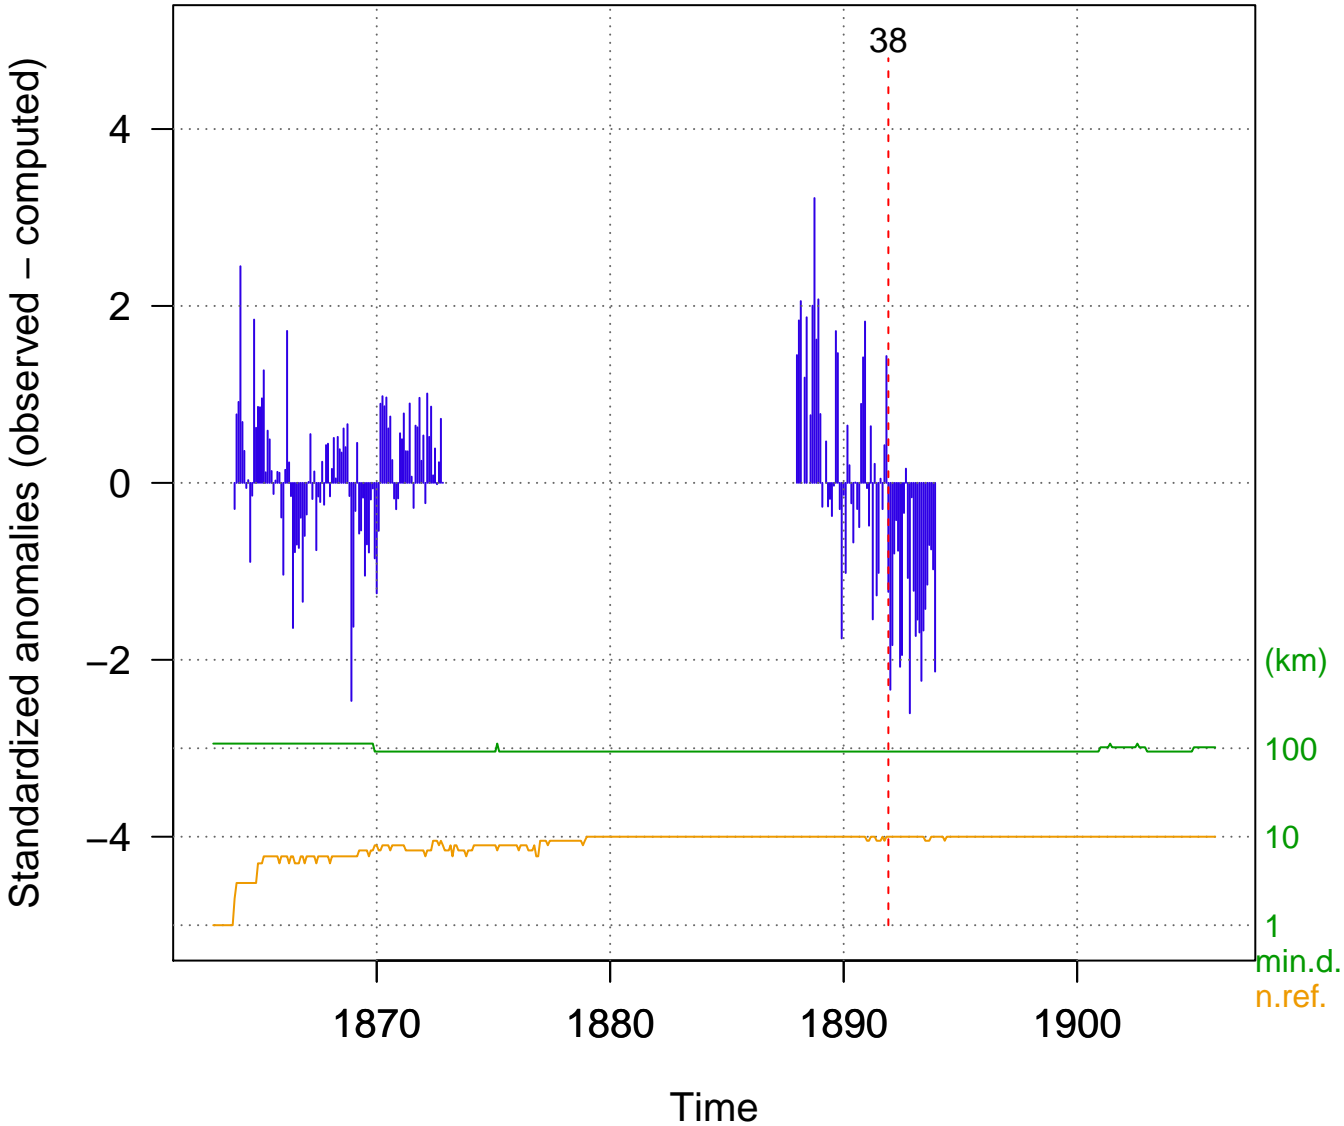

# O3 24 (Moncorvo-2) Moncorvo-2

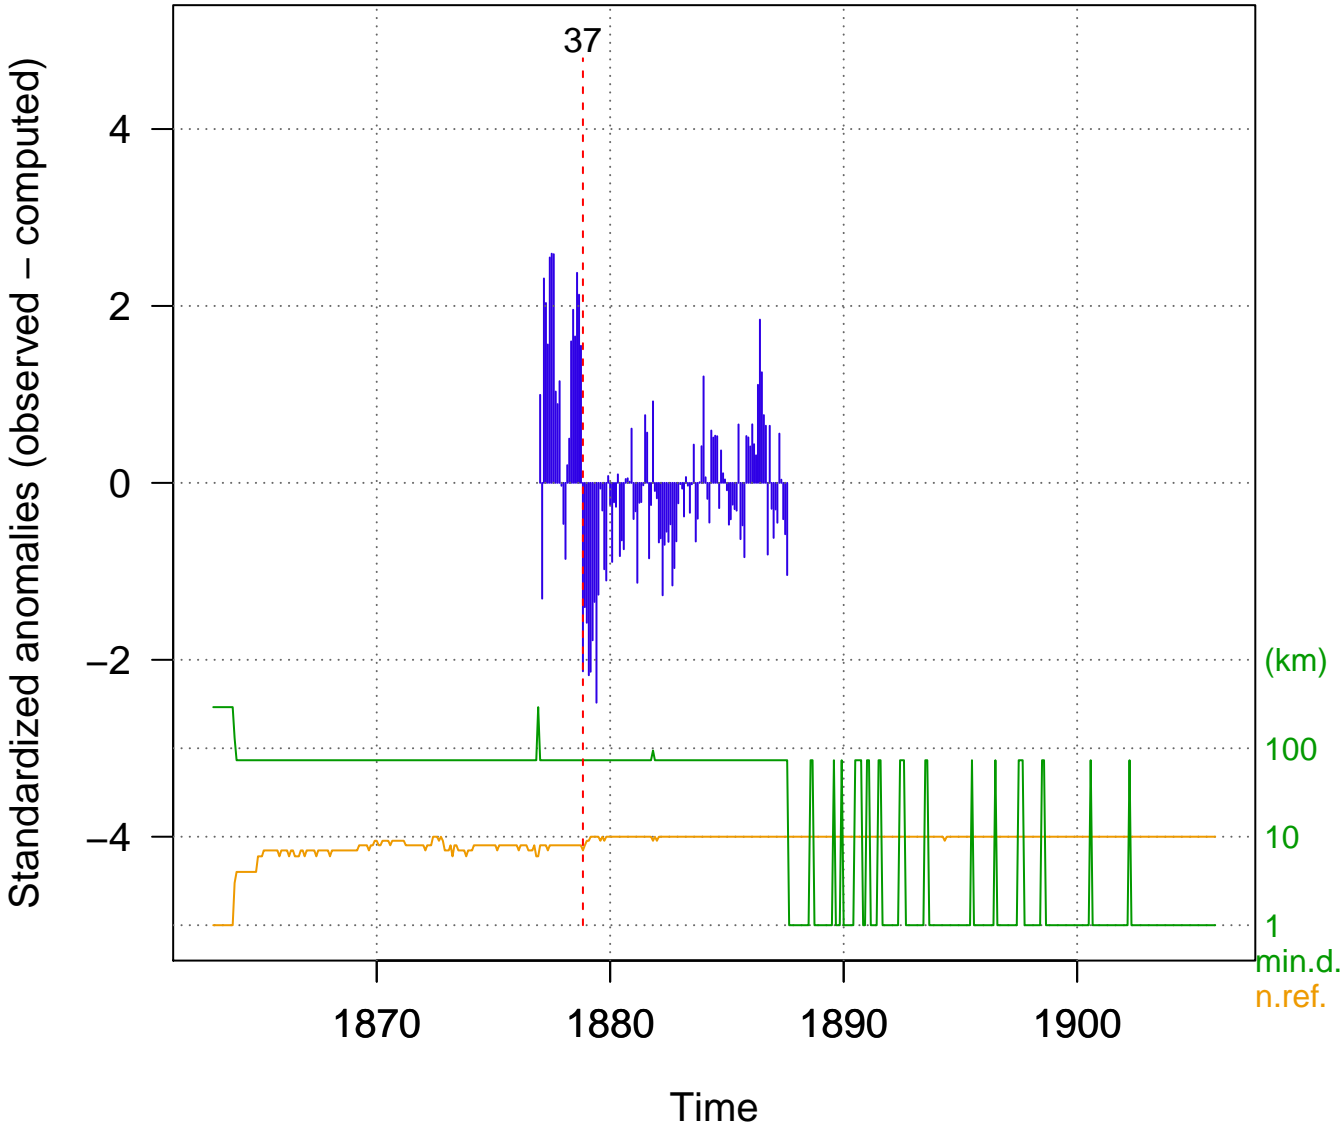

# O3 36 (Guarda-3) Guarda-3

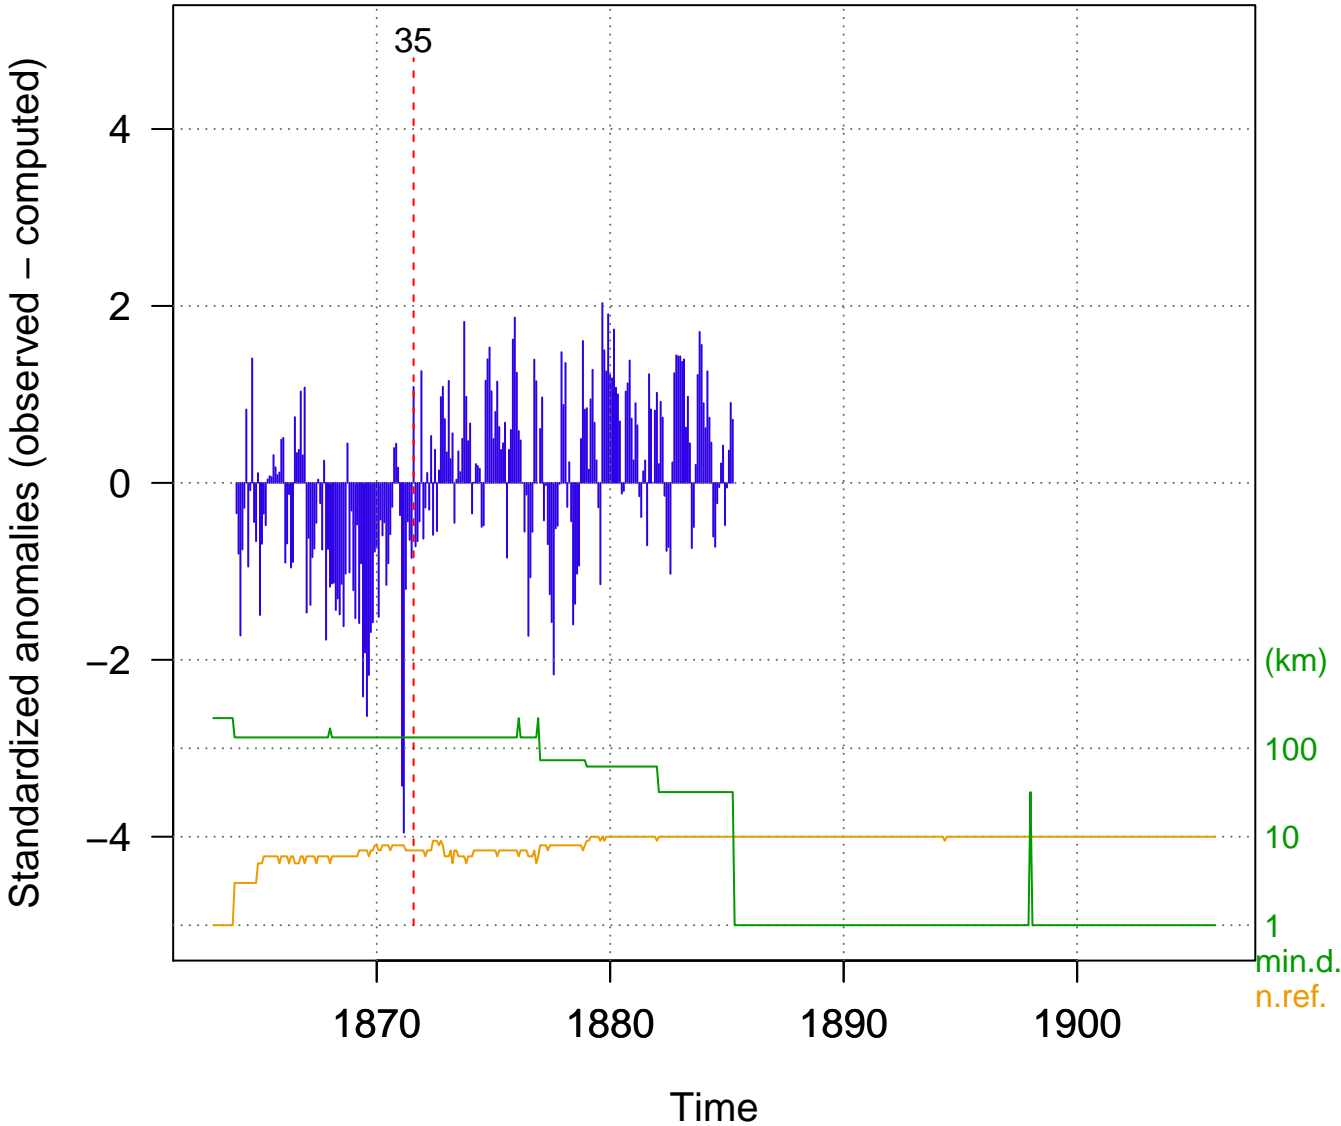

# O3 18 (Funchal) Funchal

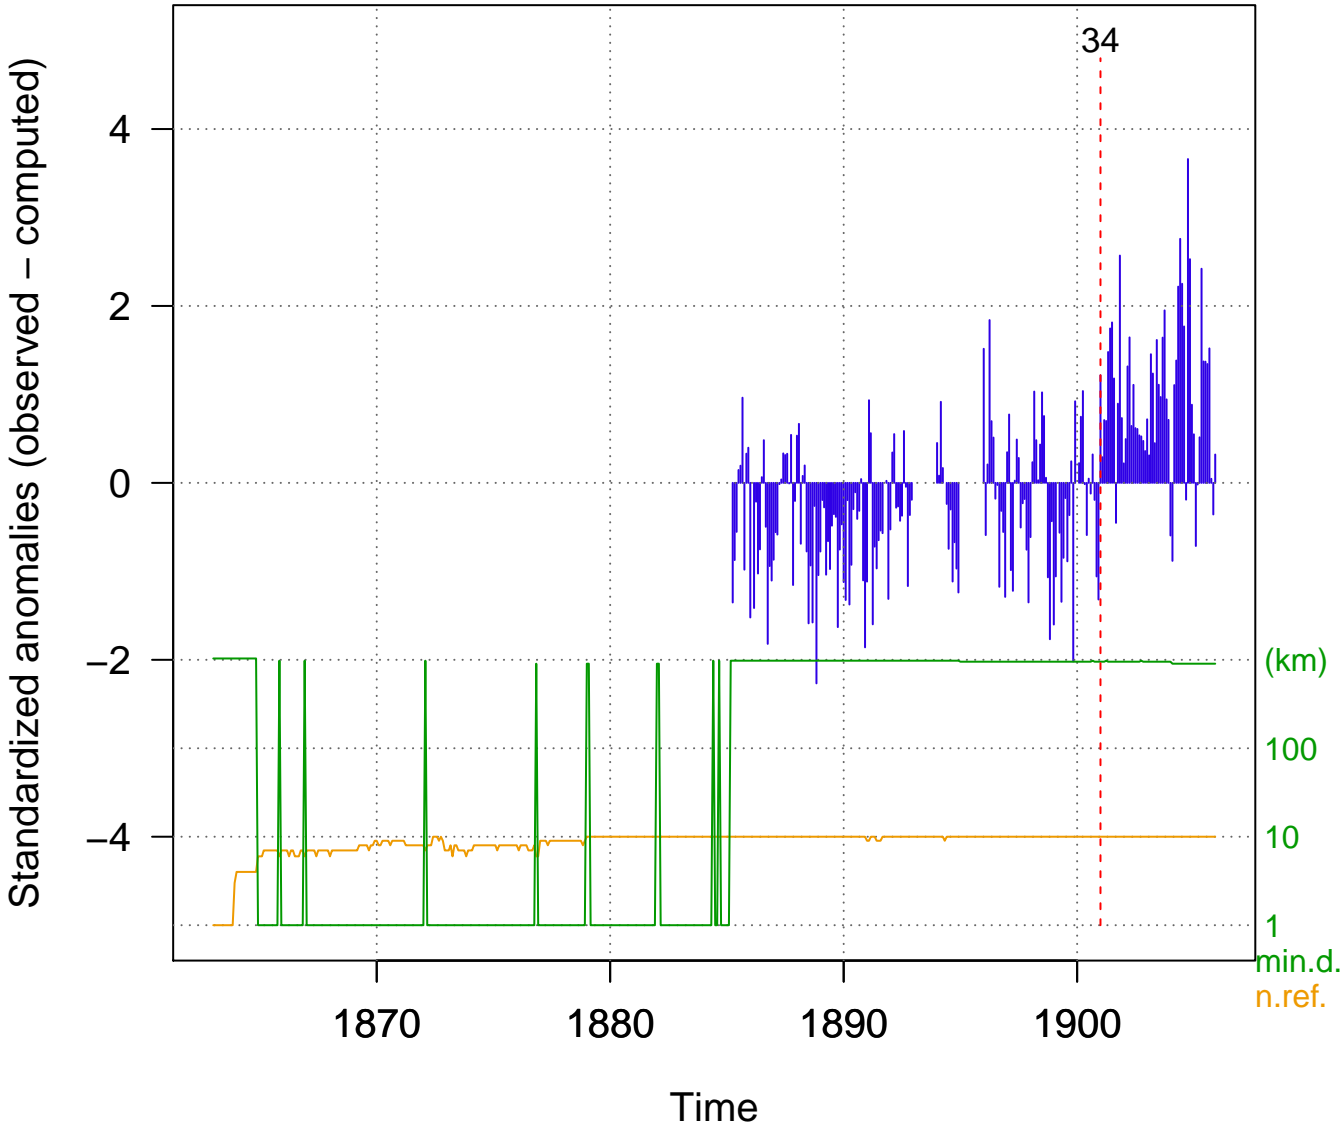

# O3 19 (S.\_Vicente) S. Vicente

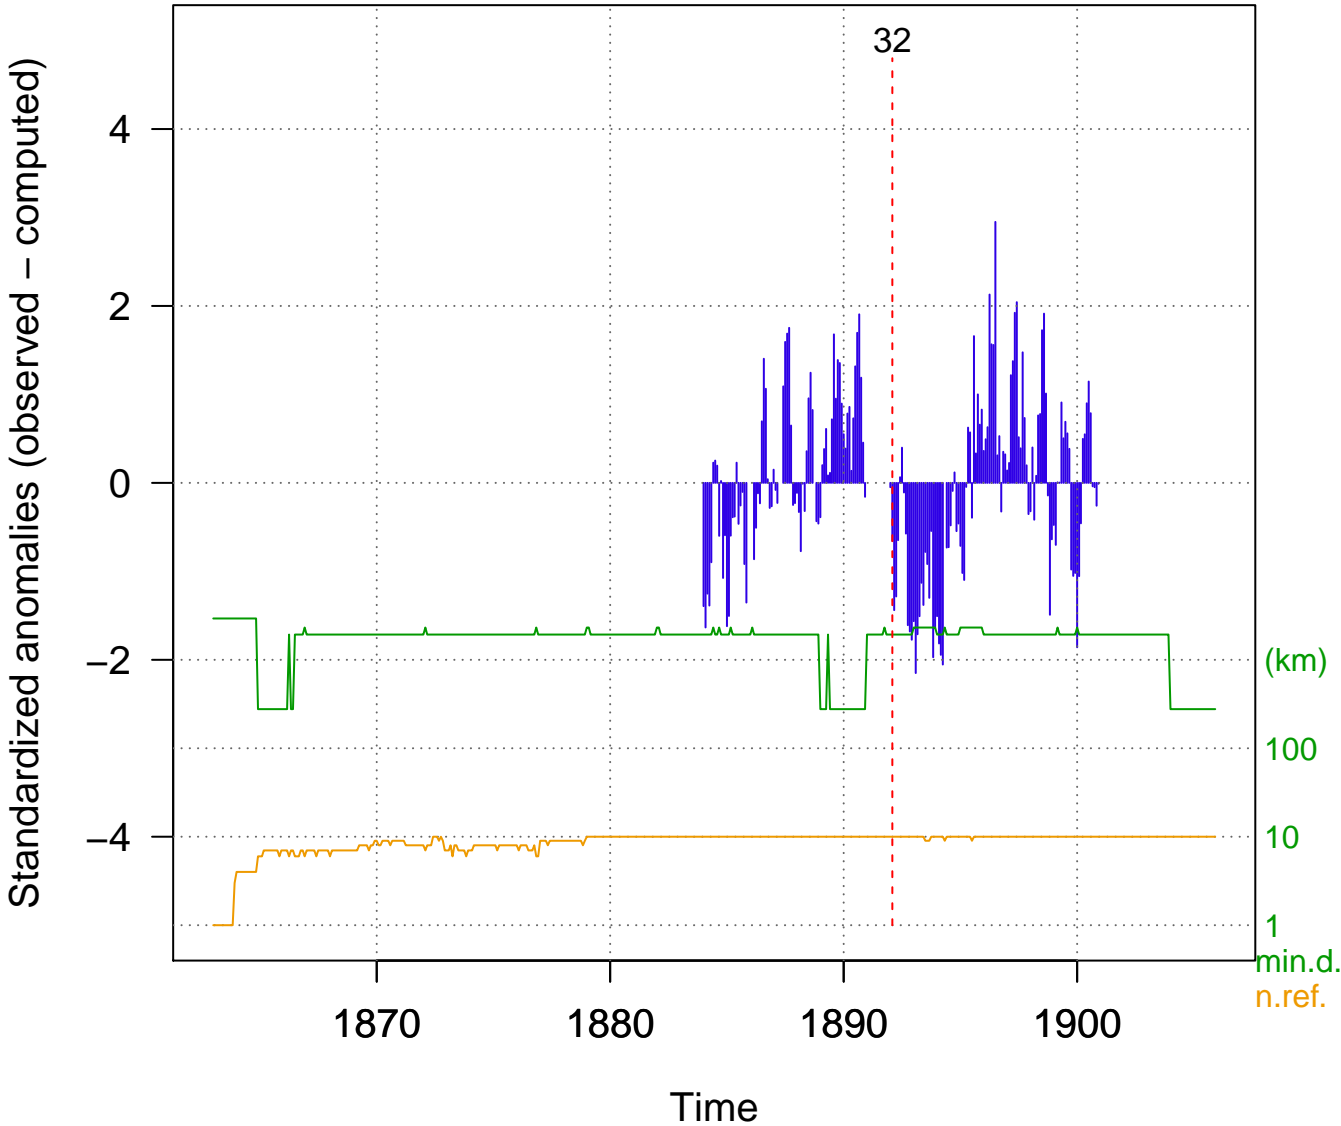



# O3 35 (Funchal-2) Funchal-2

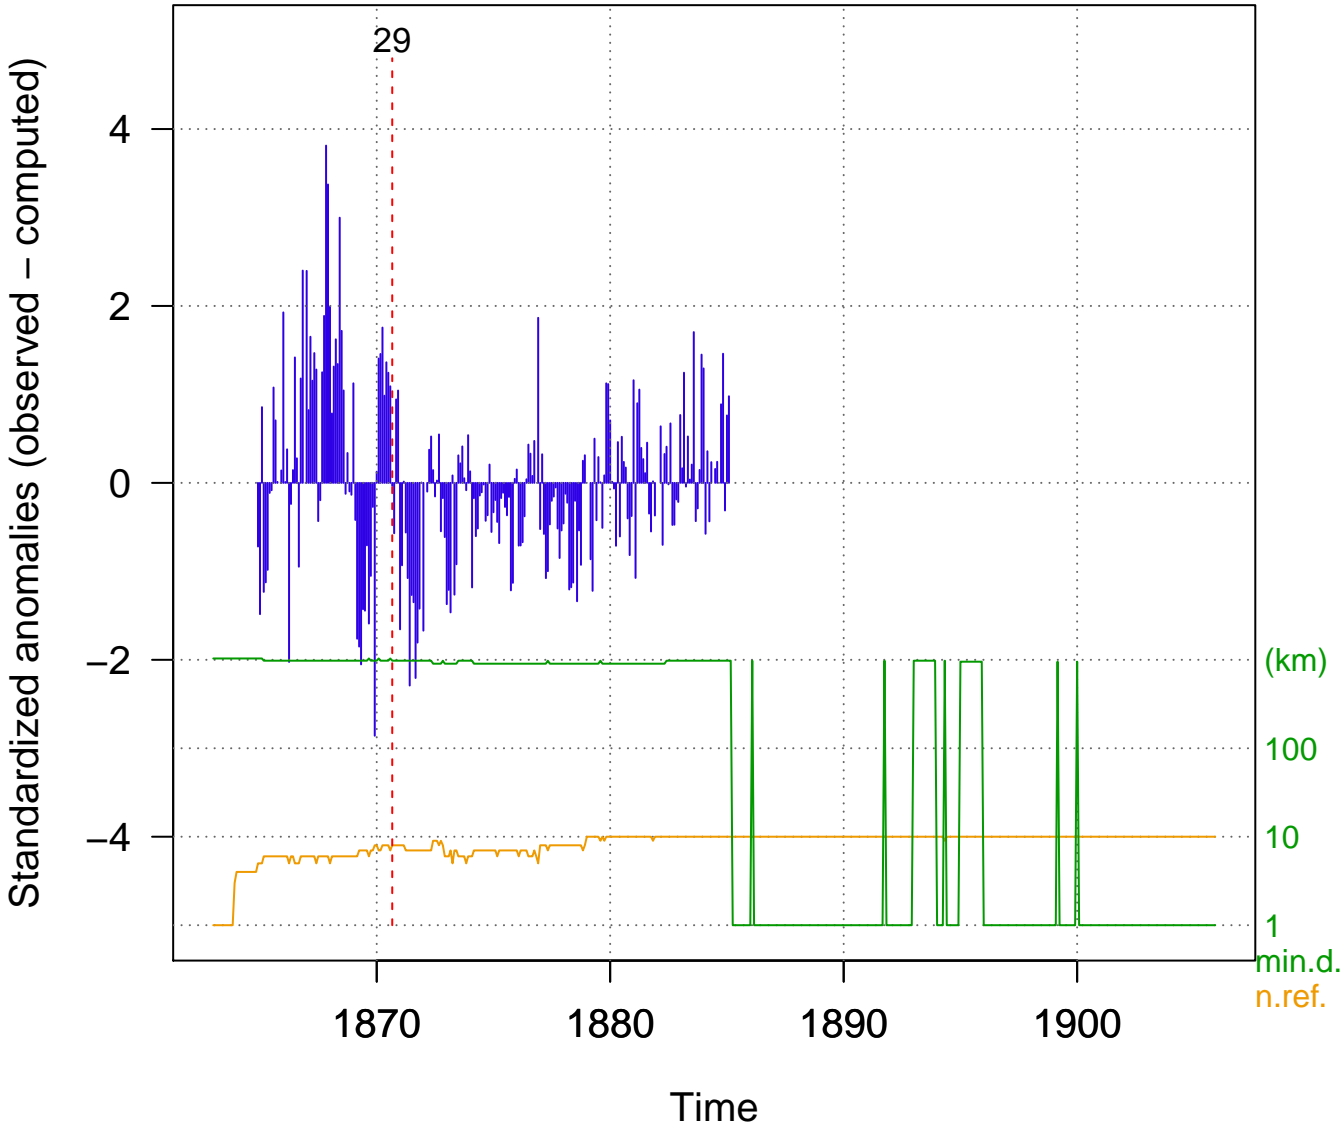

# O3 6 (Serra\_da\_Estrella) Serra da Estrella

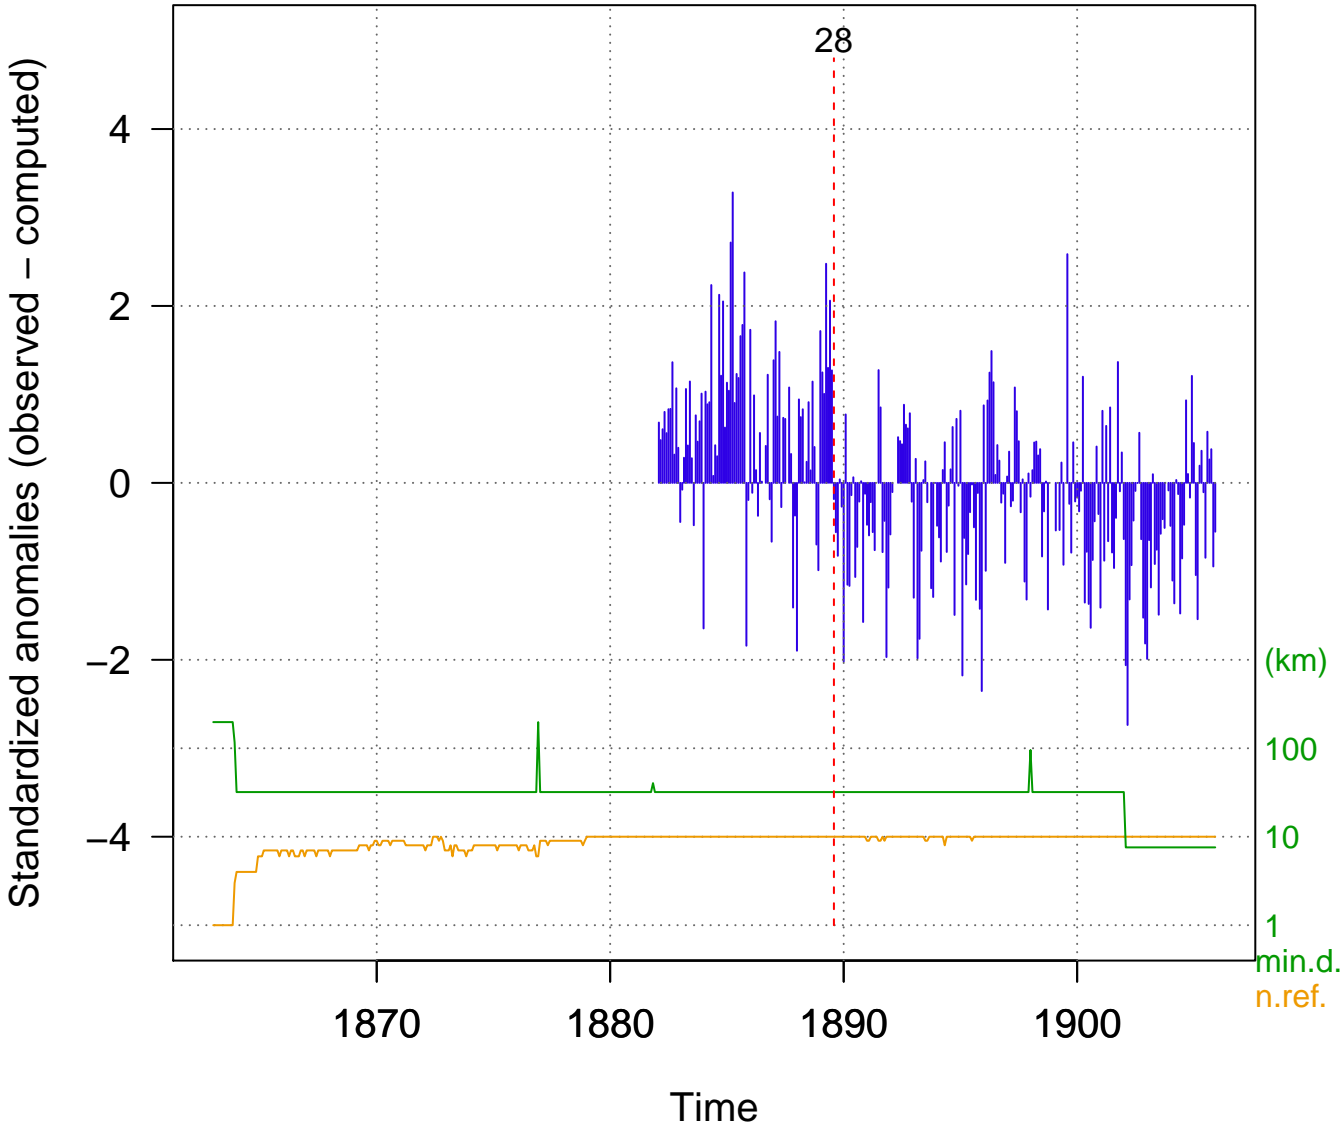

# O3 28 (Evora-2) Evora-2

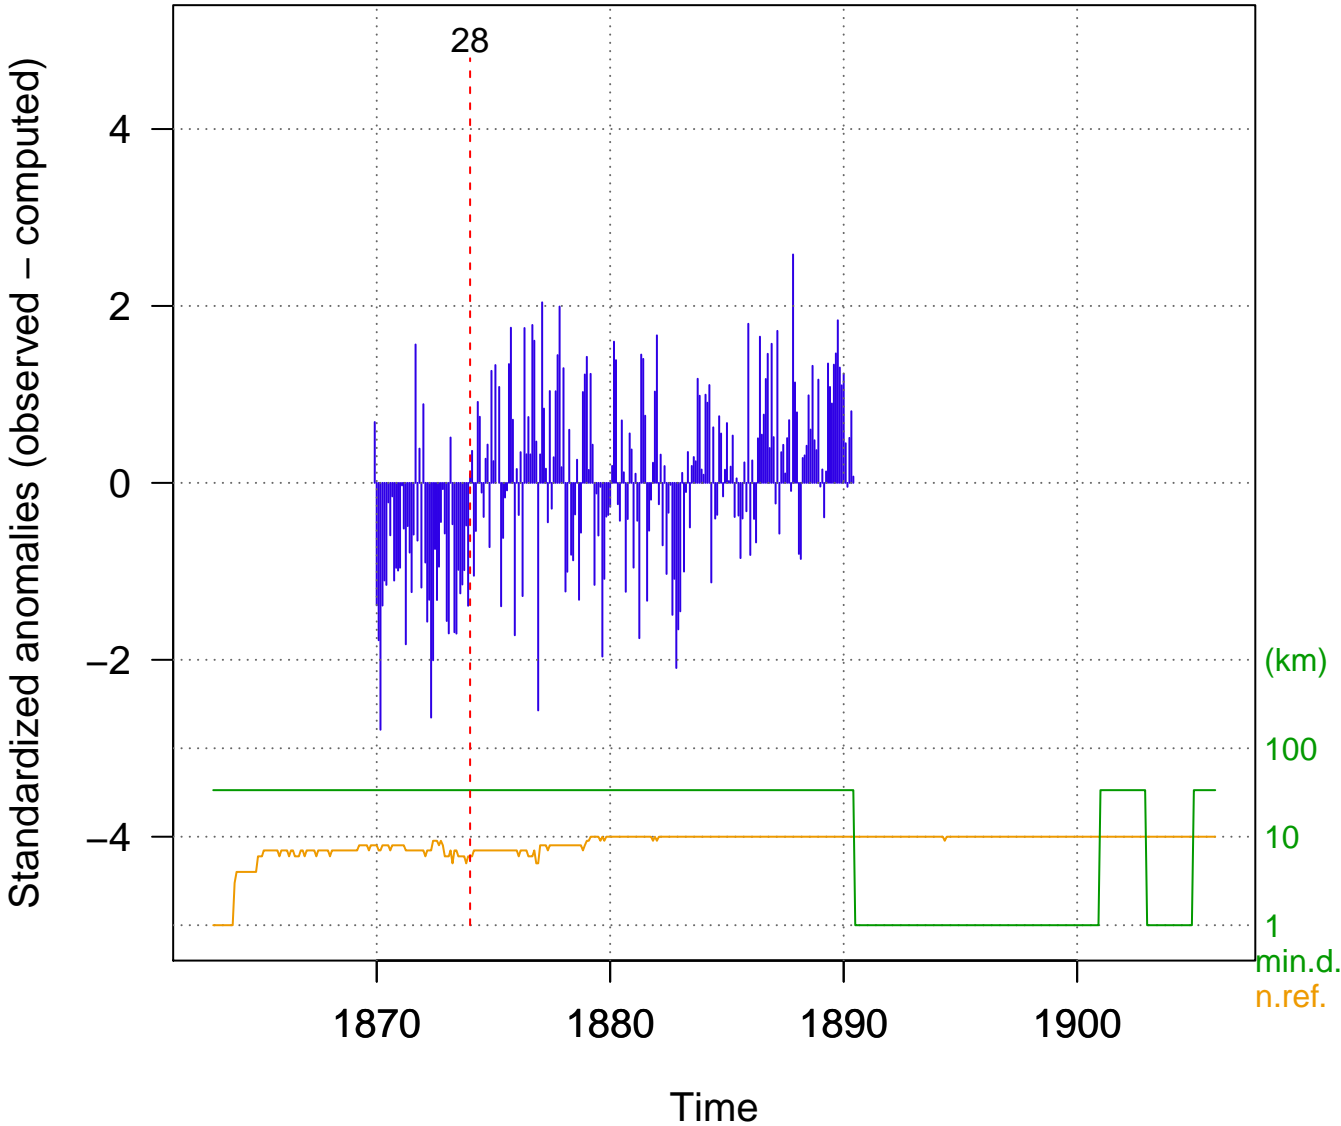

**O3 27 (Montalegre-2)**  
**Montalegre-2**

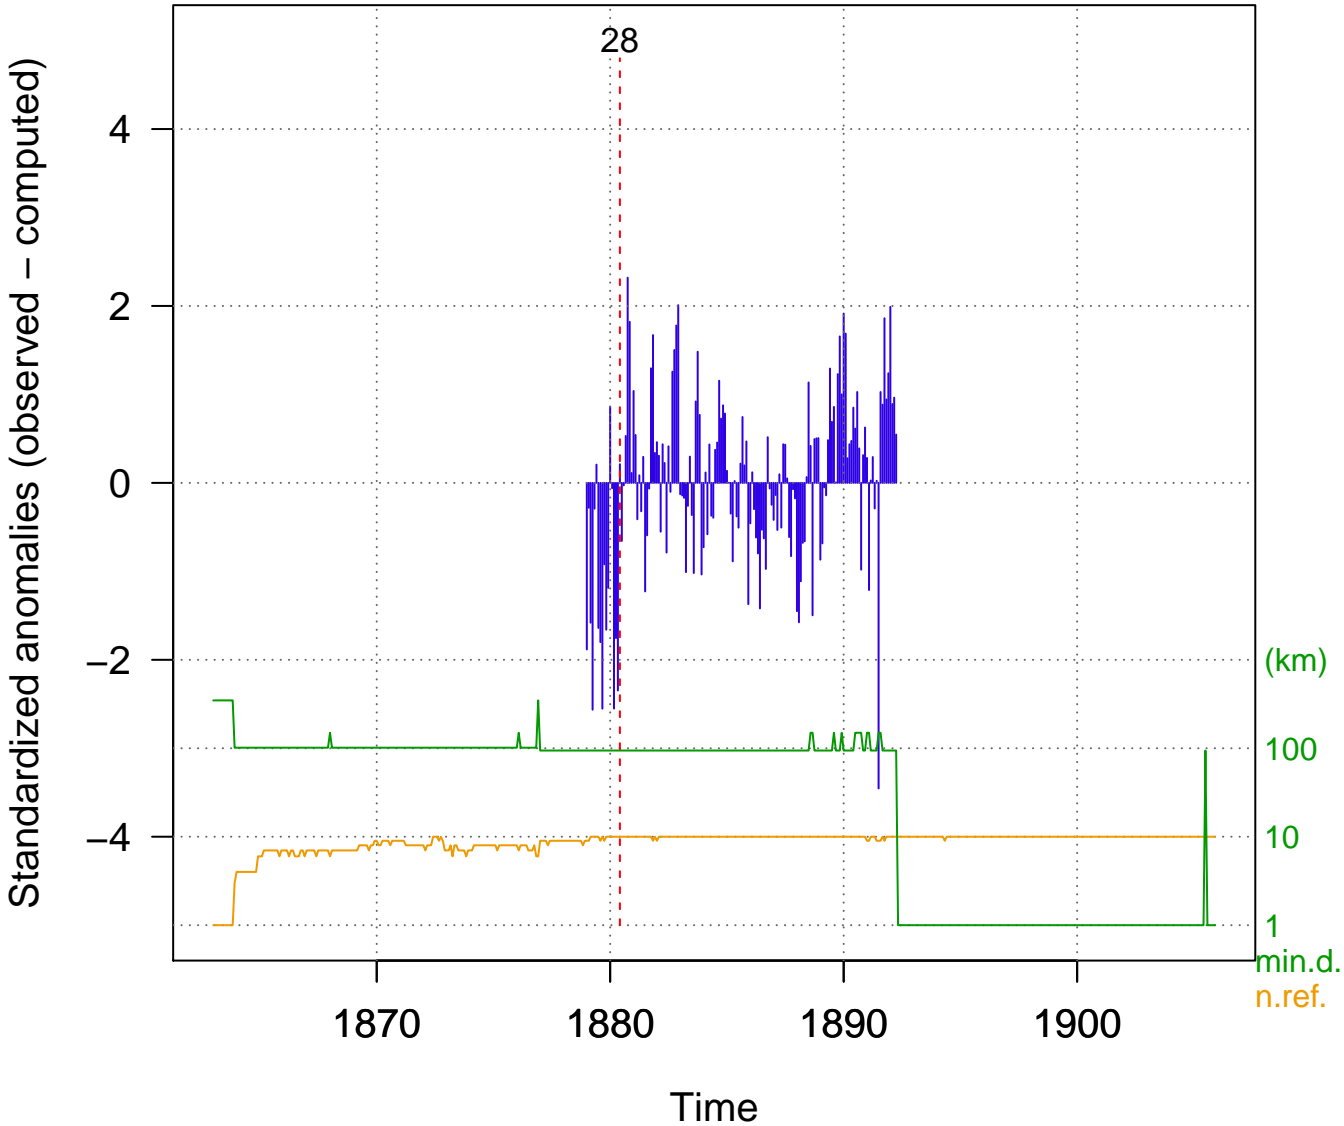

# O3 38 (Campo\_Maior-2) Campo Maior-2

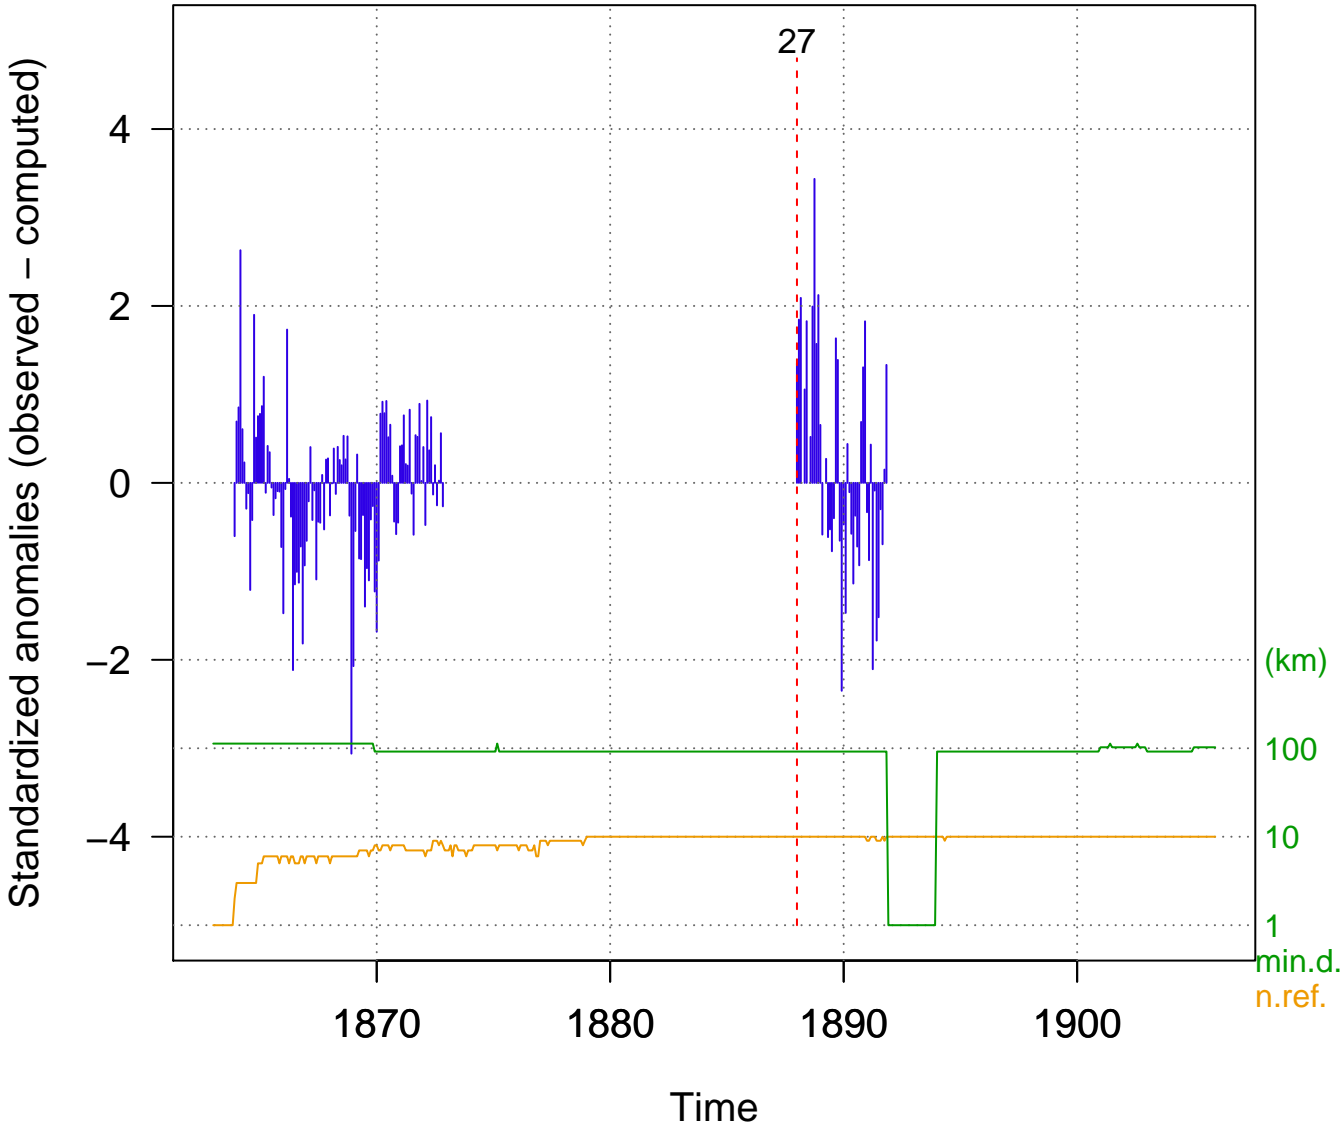

# O3 2 (Moncorvo) Moncorvo

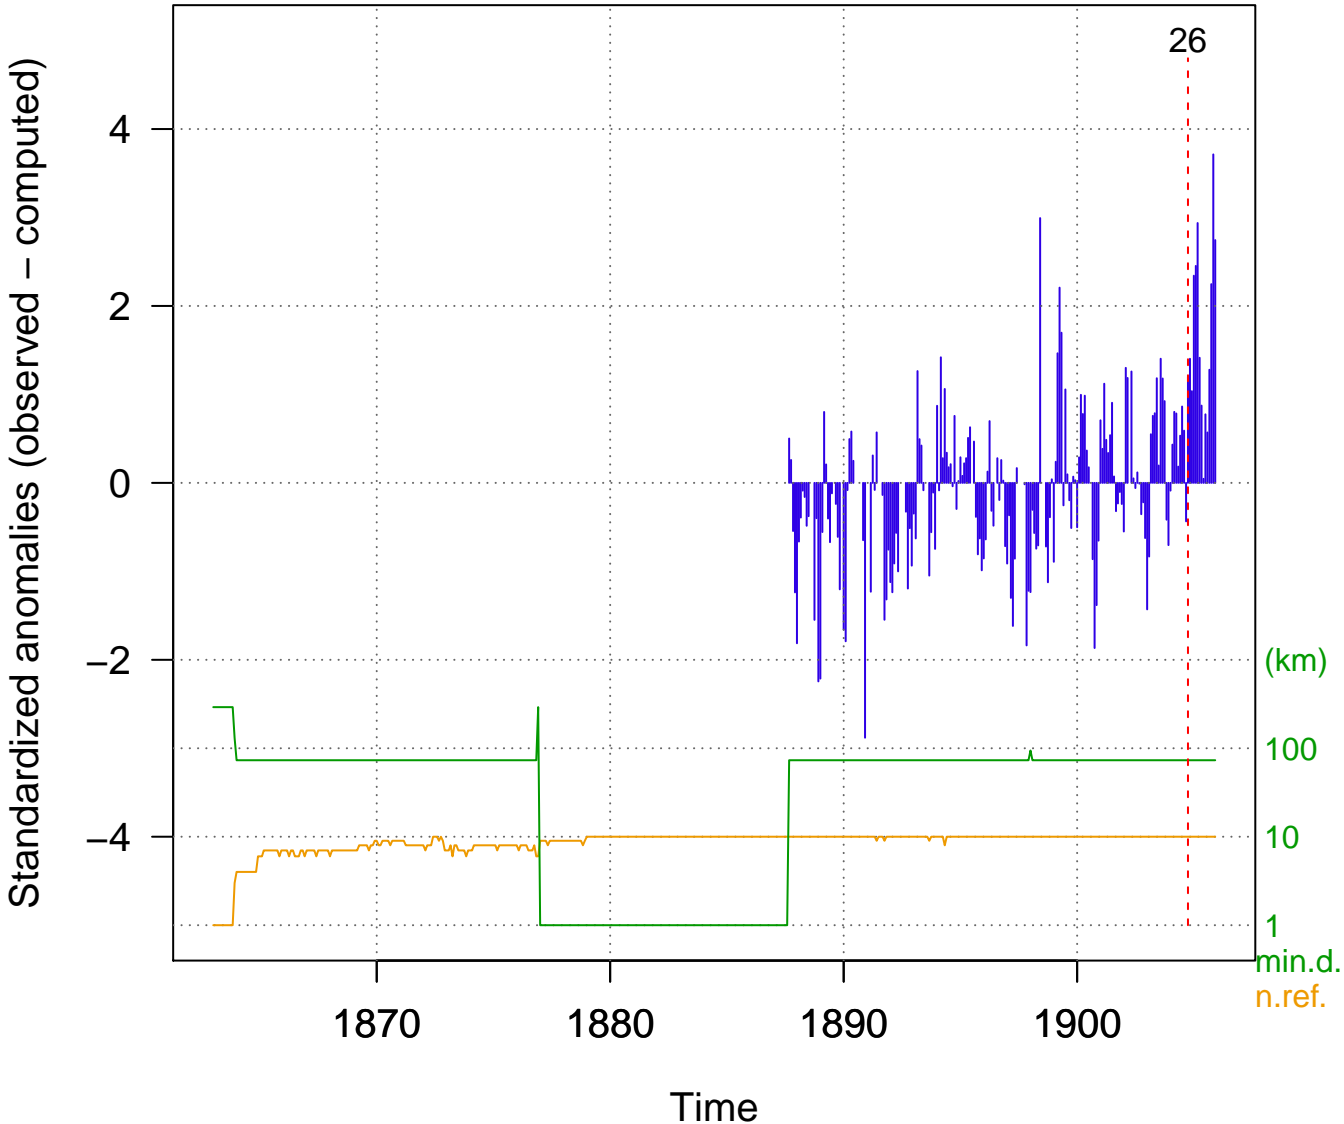

# O3 10 (Infante\_D\_Luiz)

## Lisbon Infante D. Luiz

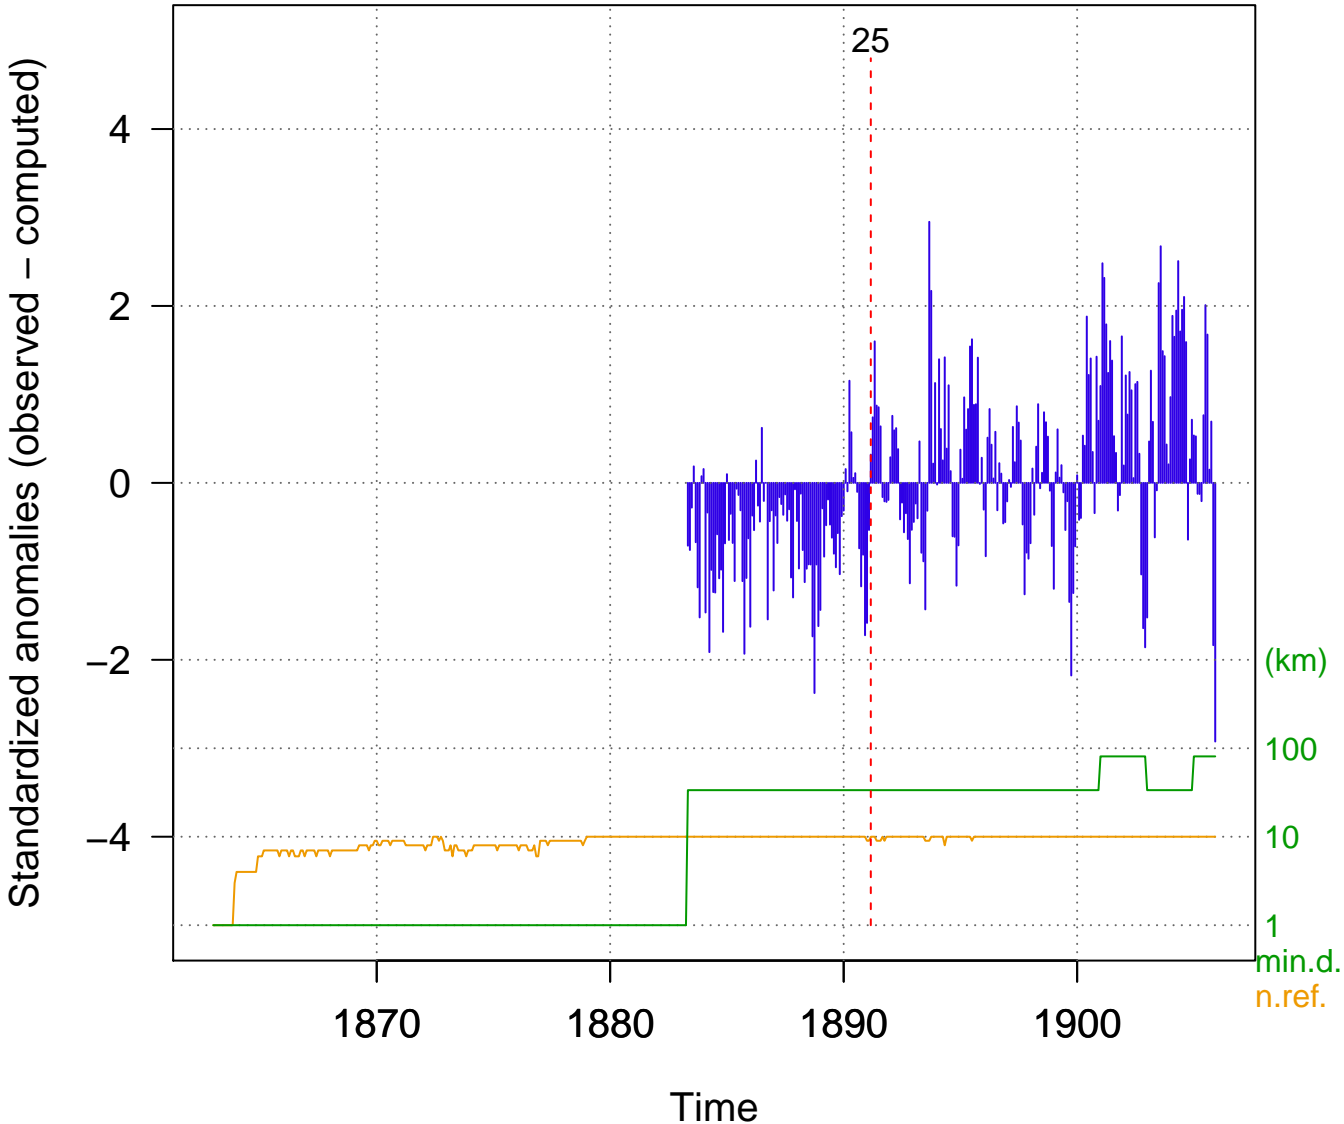

# O3 26 (Infante\_D\_Luiz-2)

Lisbon Infante D. Luiz-2

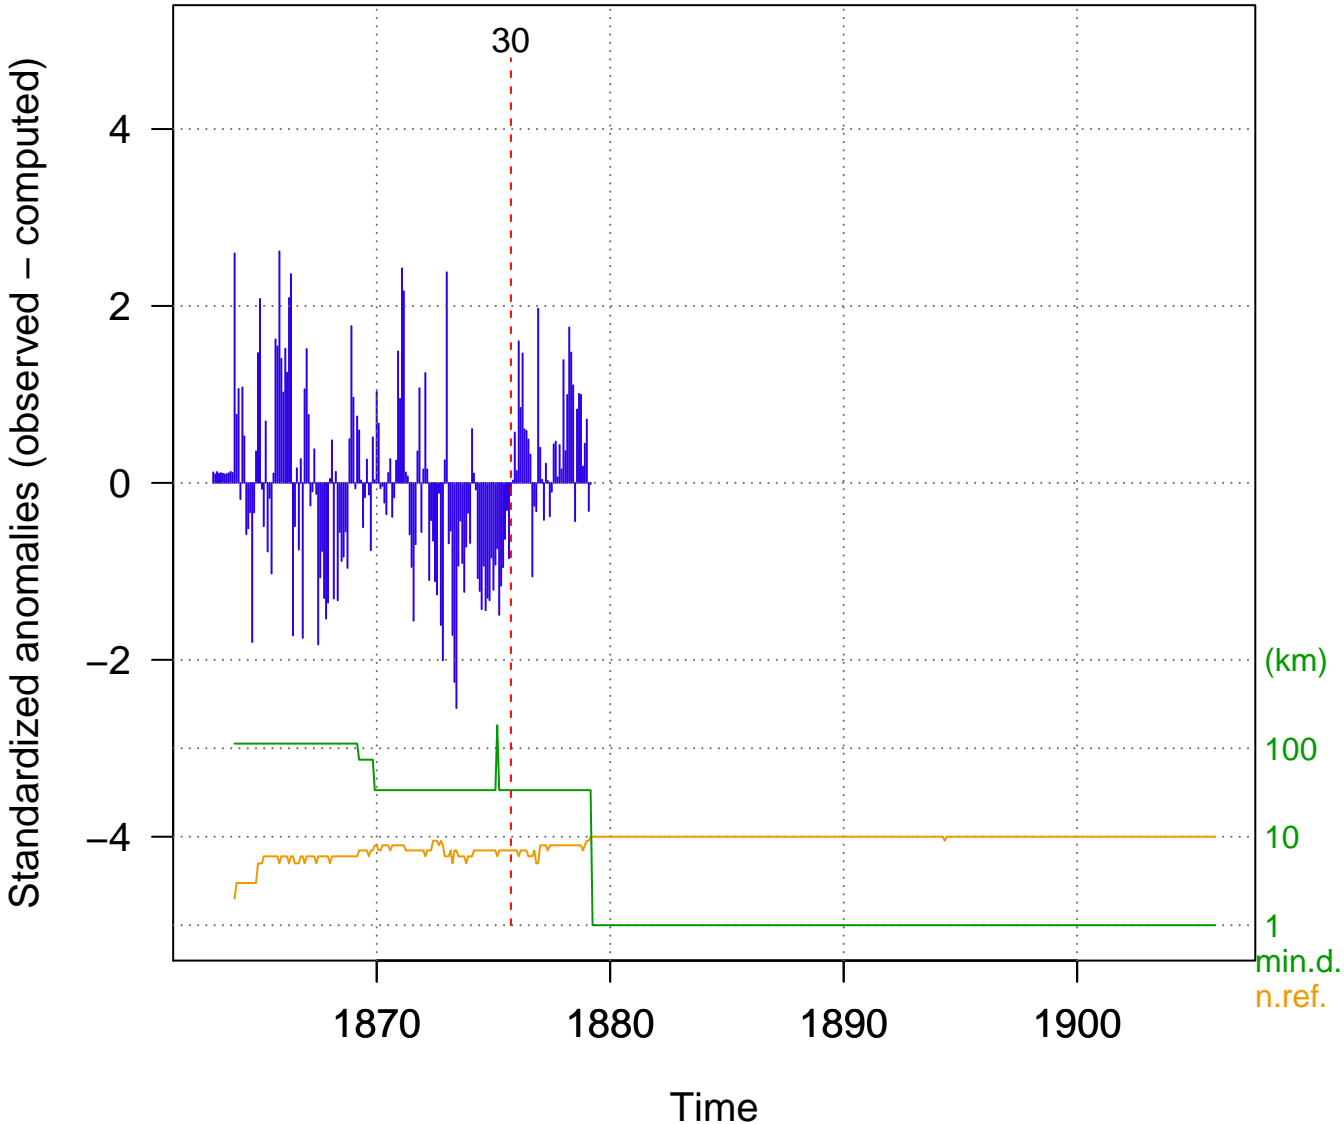



**Histogram of maximum SNHT (Stage 1)**

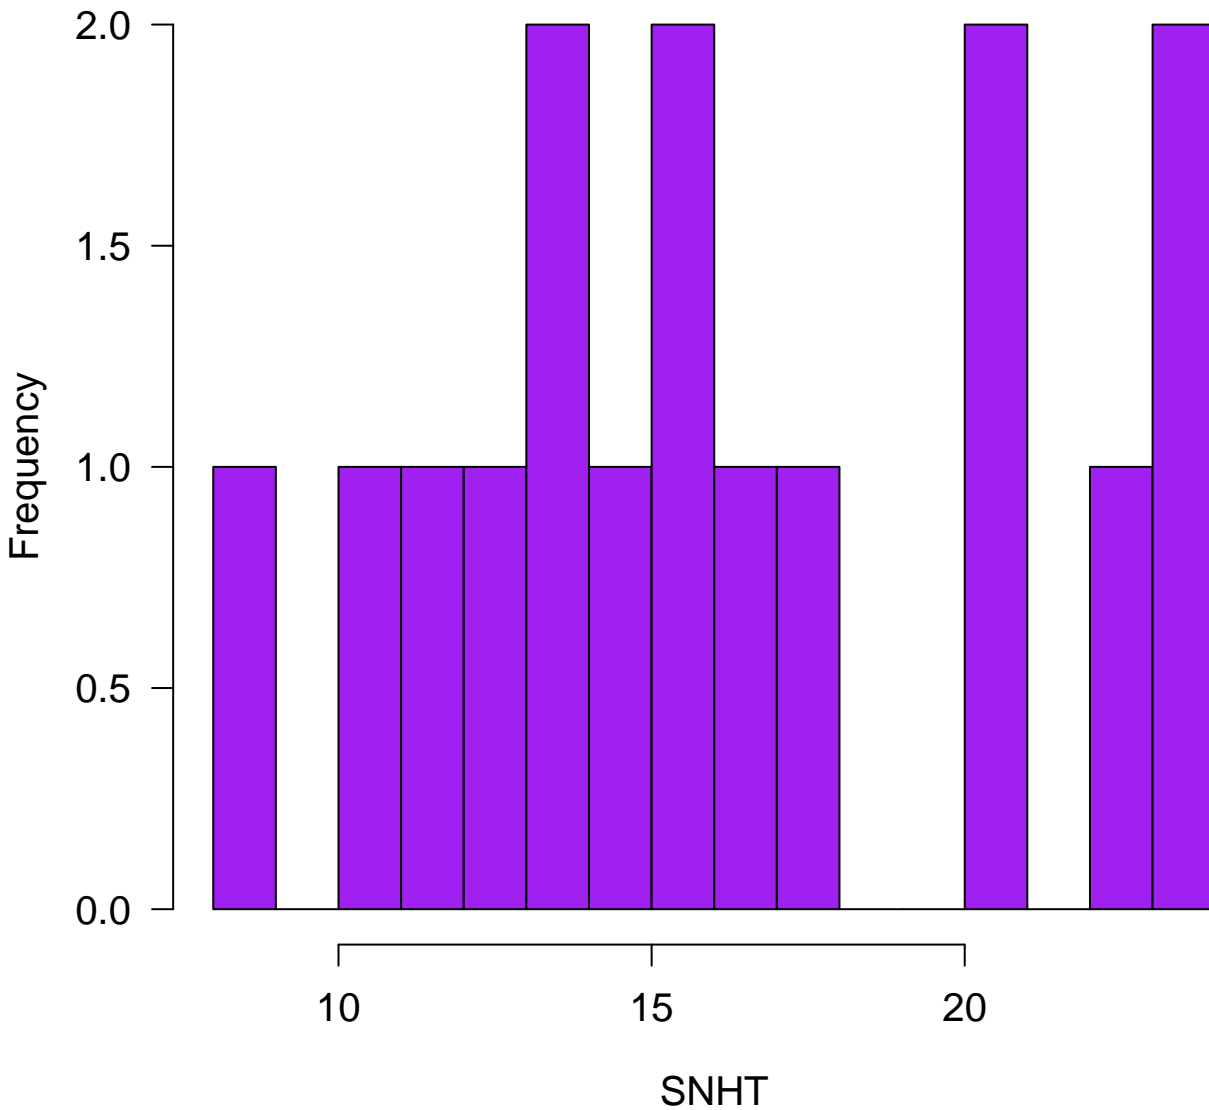

# Stage 2

Binary splits on  
whole series with  
 $\text{std}=3$ ,  $\text{SNHT}>25$   
and  $\text{wd}=1000$  km

# O3 11 (Angra\_do\_Heroismo)

## Angra do Heroismo

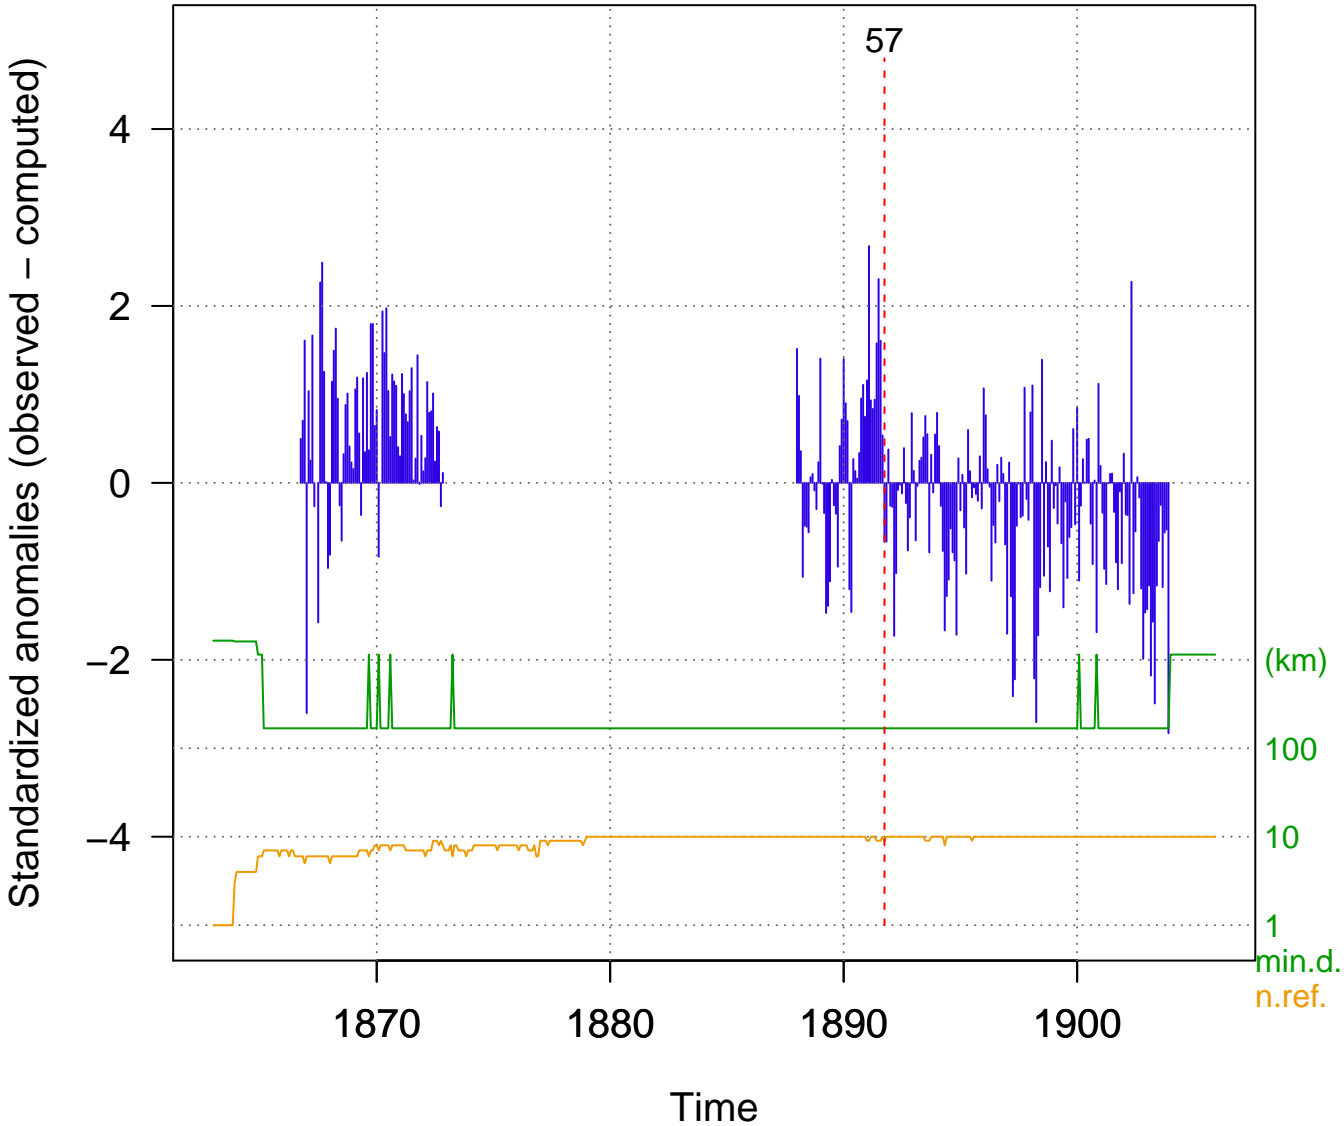

# O3 12 (Evora) Evora

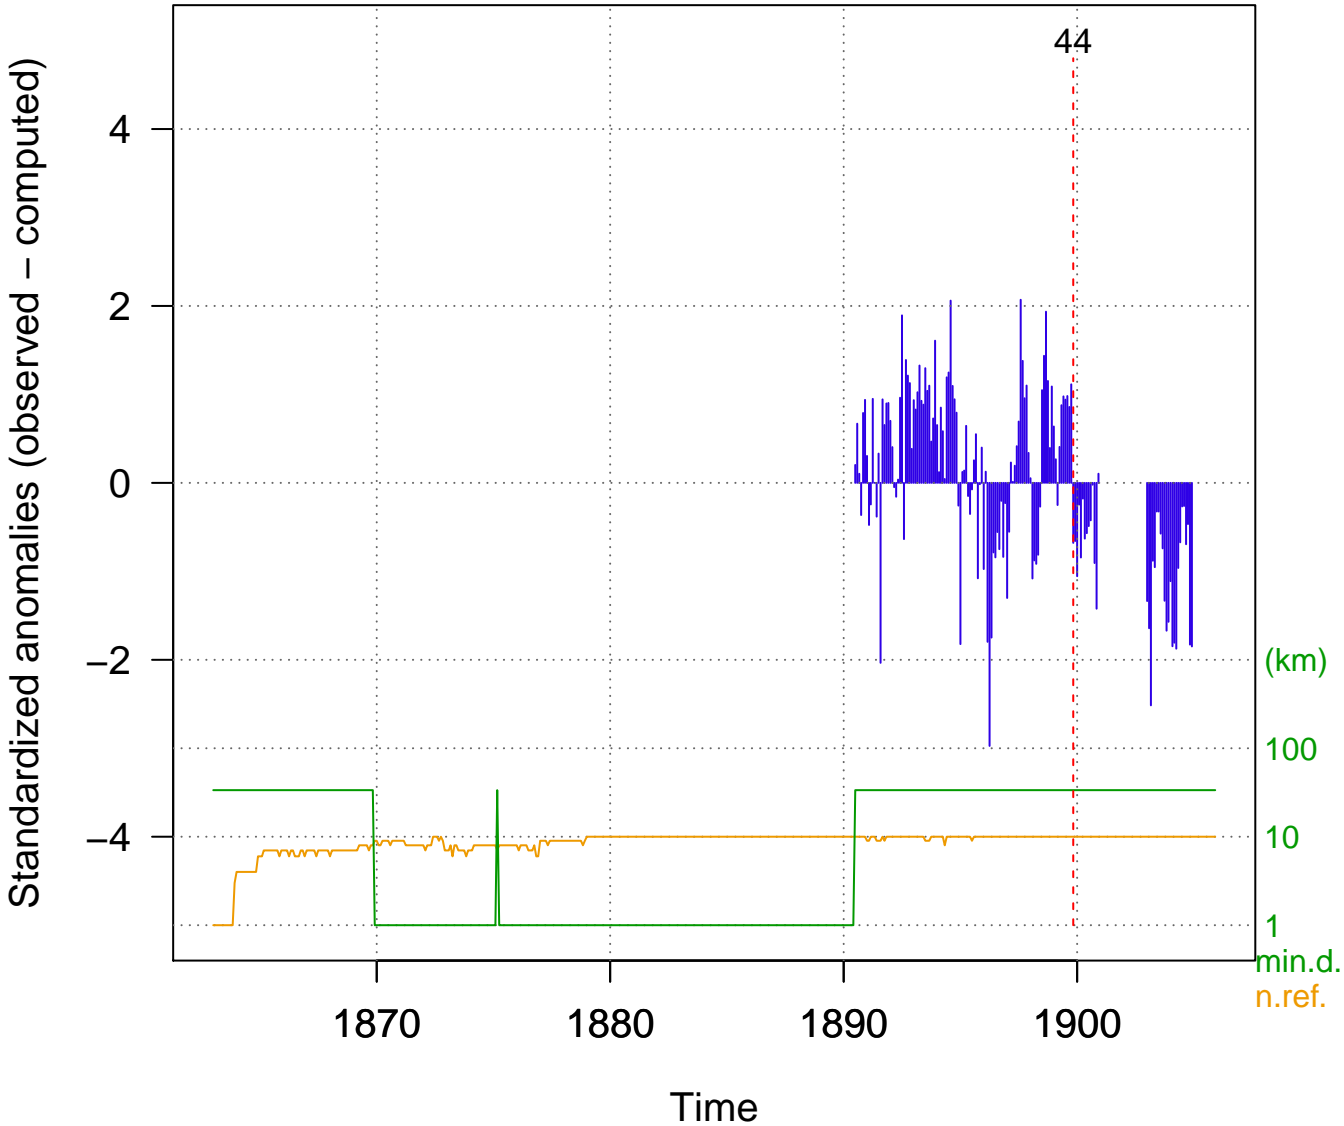

# O3 24 (Moncorvo-2) Moncorvo-2

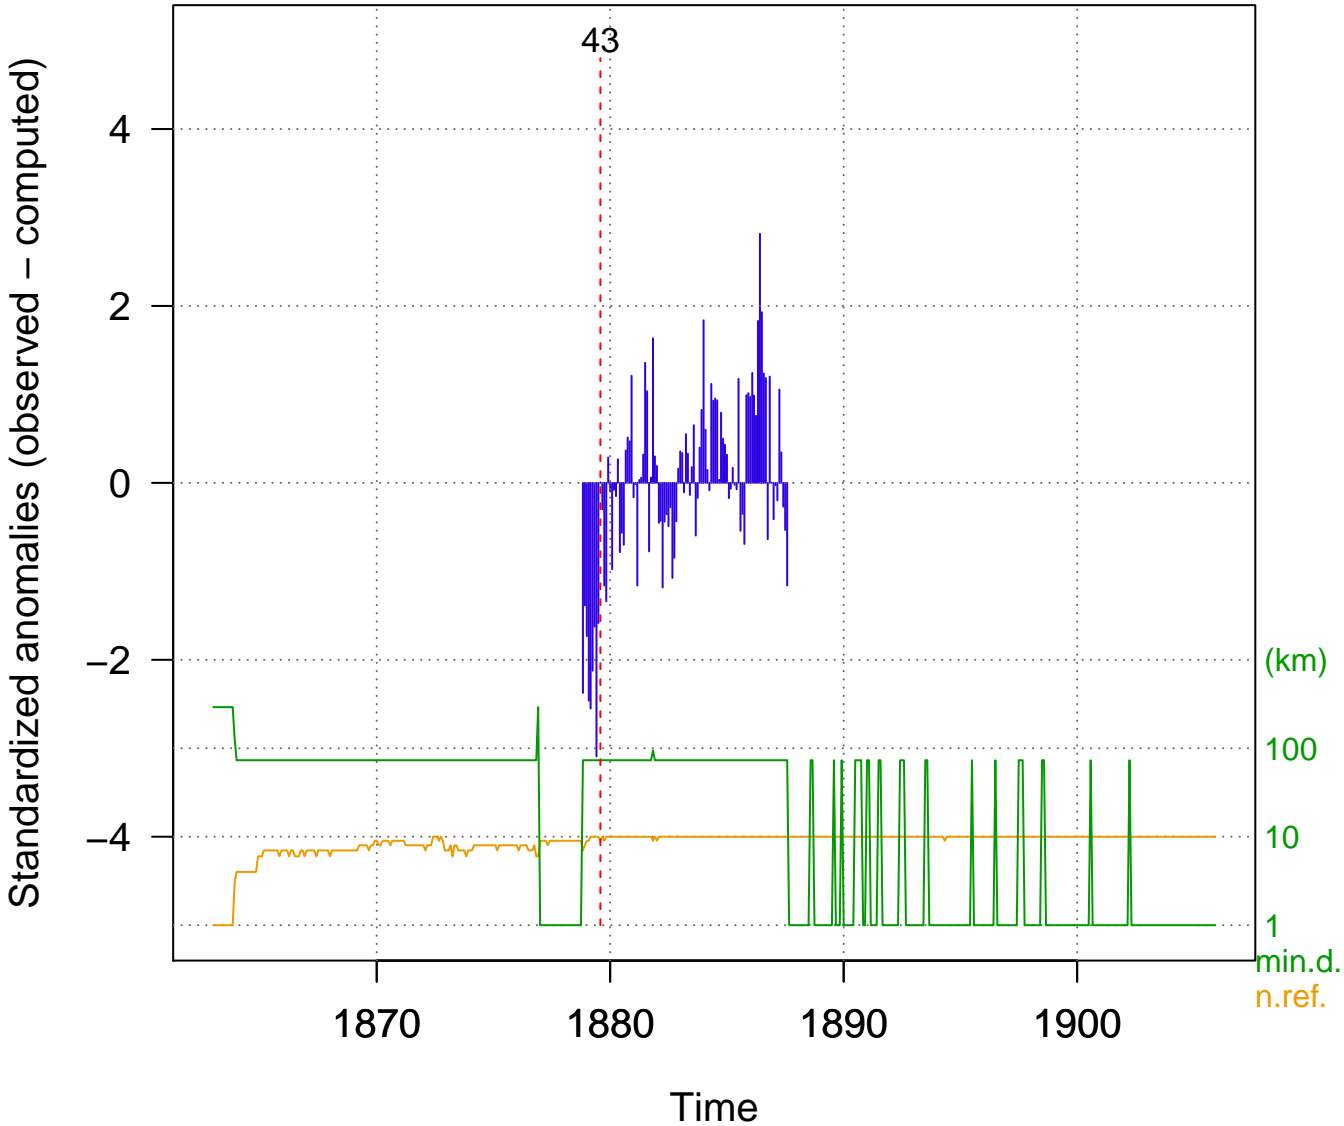

# O3 19 (S.\_Vicente) S. Vicente

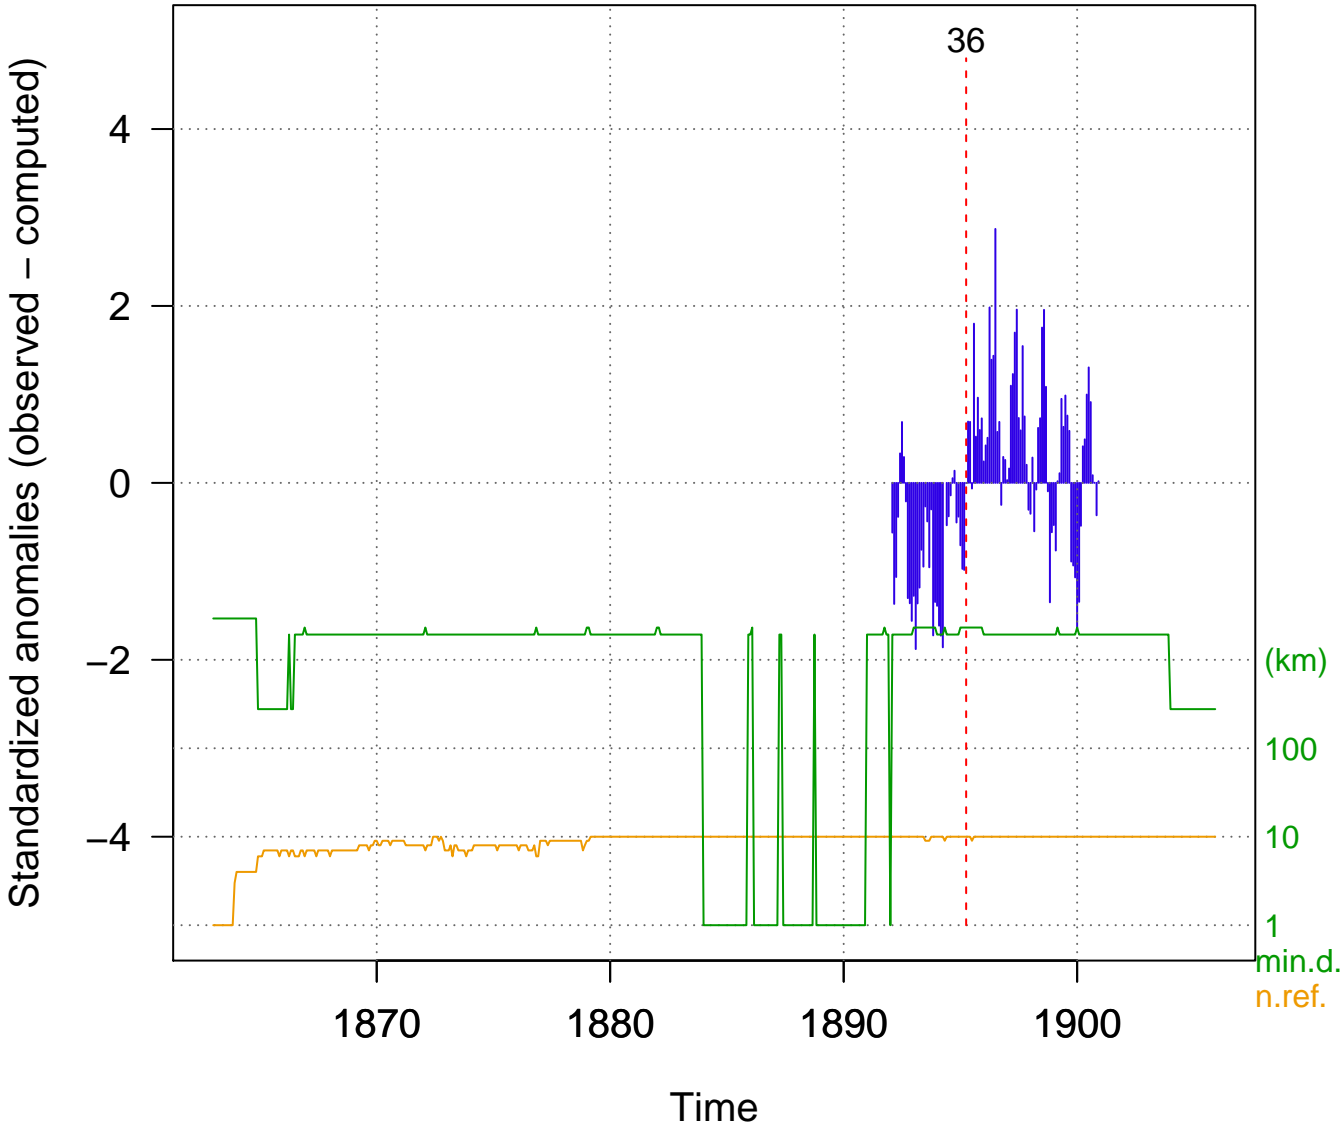

**O3 42 (S.\_Vicente-2)**  
**S. Vicente-2**

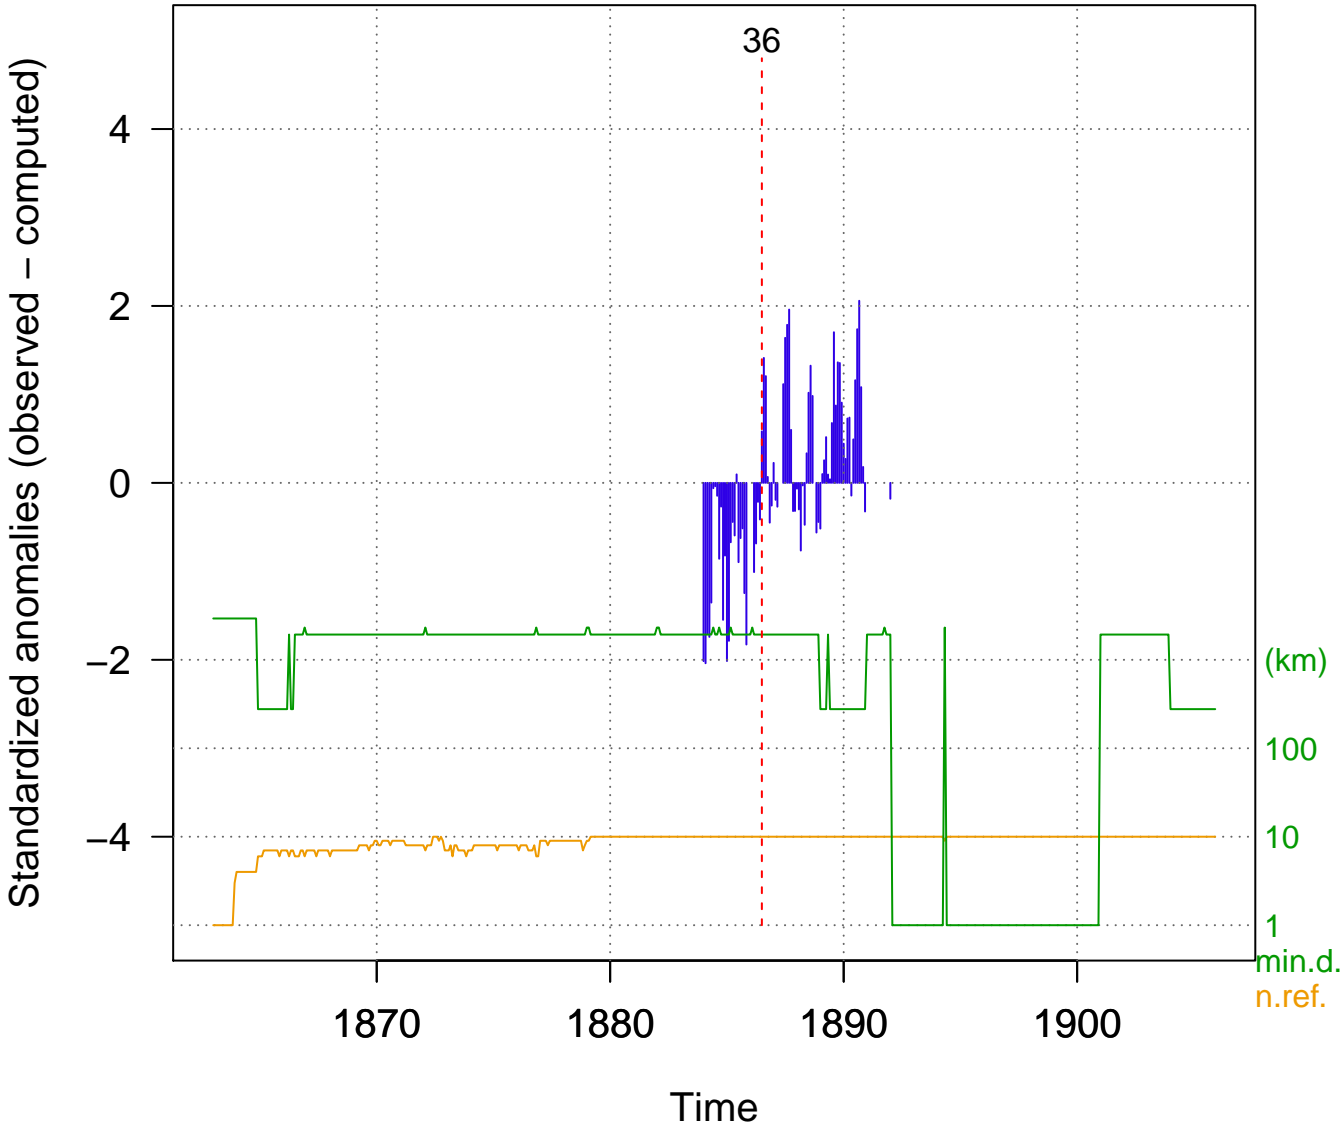

# O3 14 (Beja) Beja

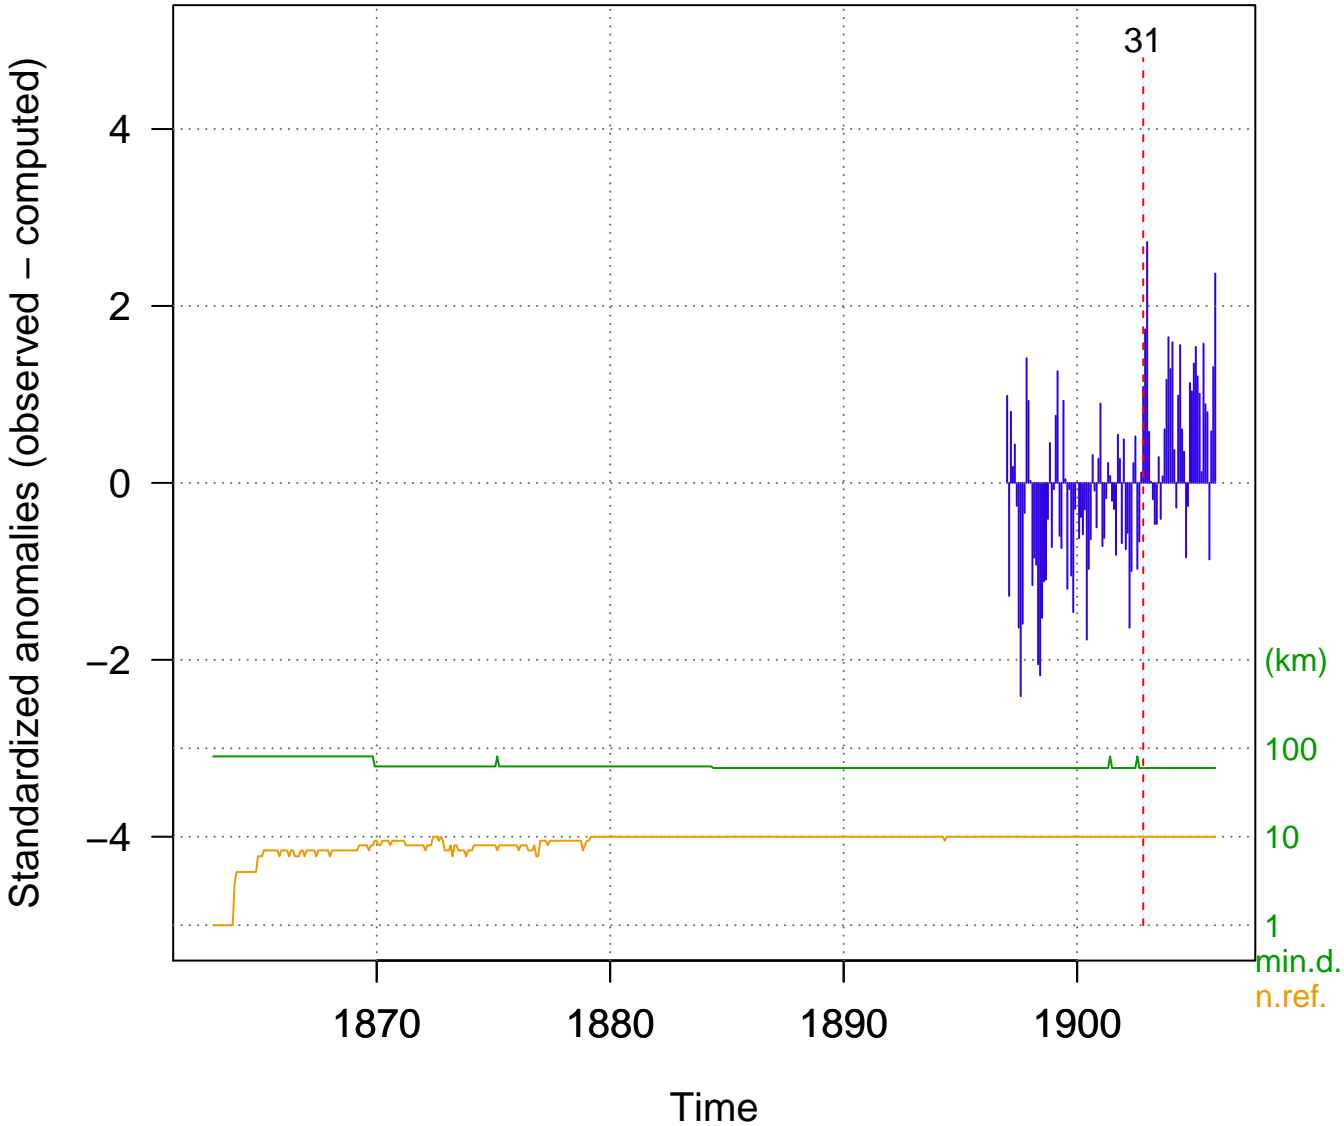



O3 4 (Vizeu)

Vizeu

Standardized anomalies (observed - computed)

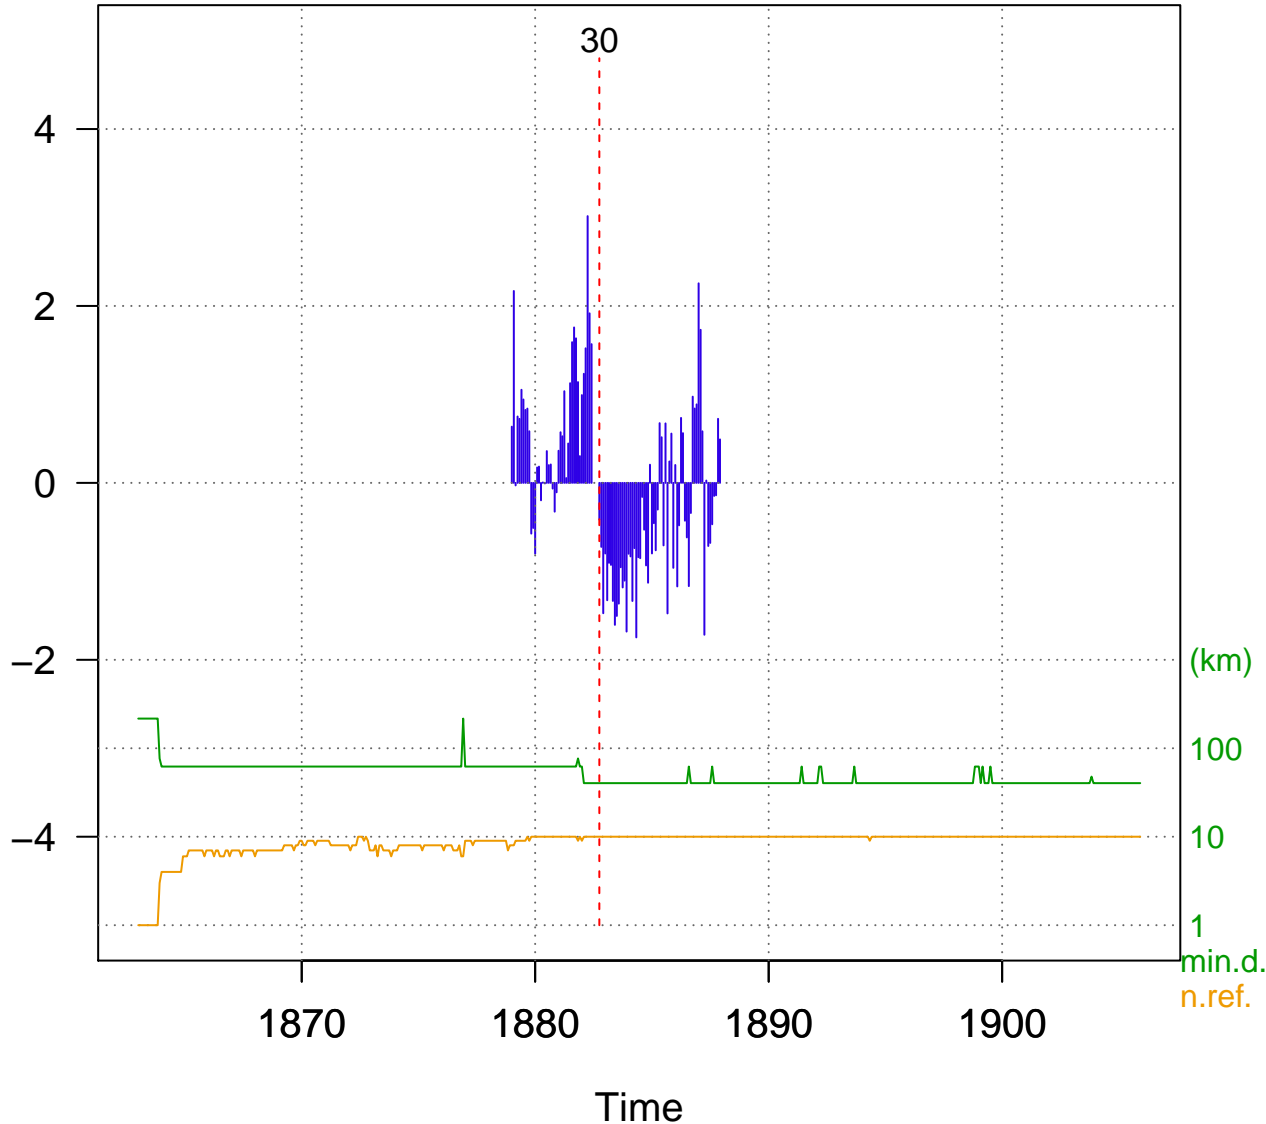

# O3 13 (Villa\_Fernando)

## Villa Fernando

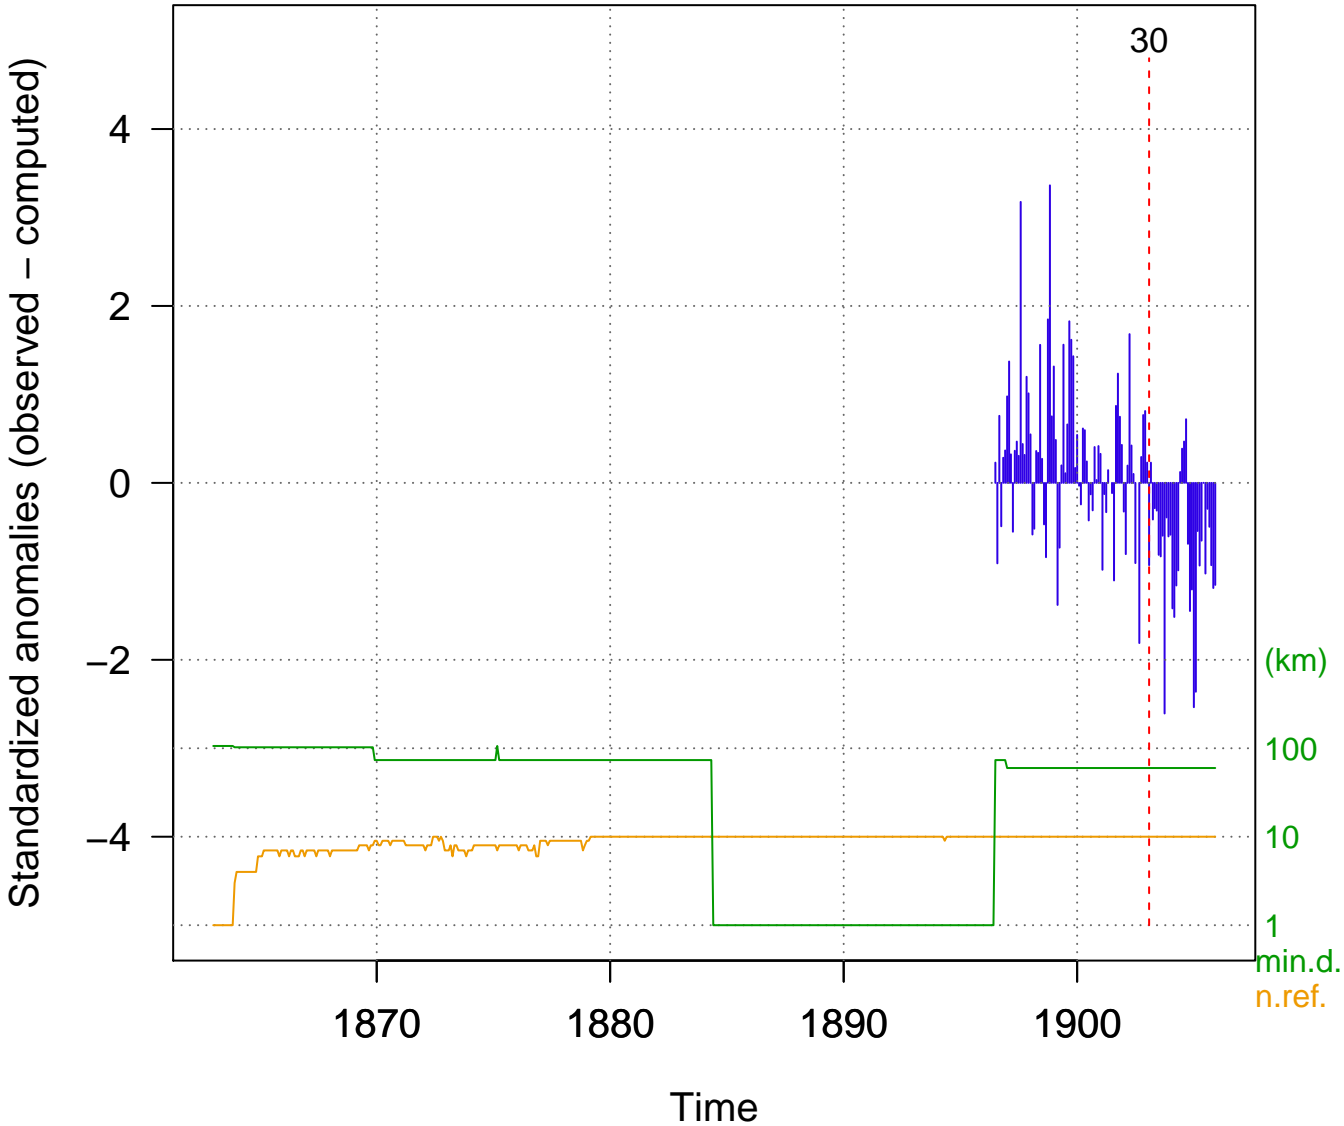

# O3 3 (Porto) Porto

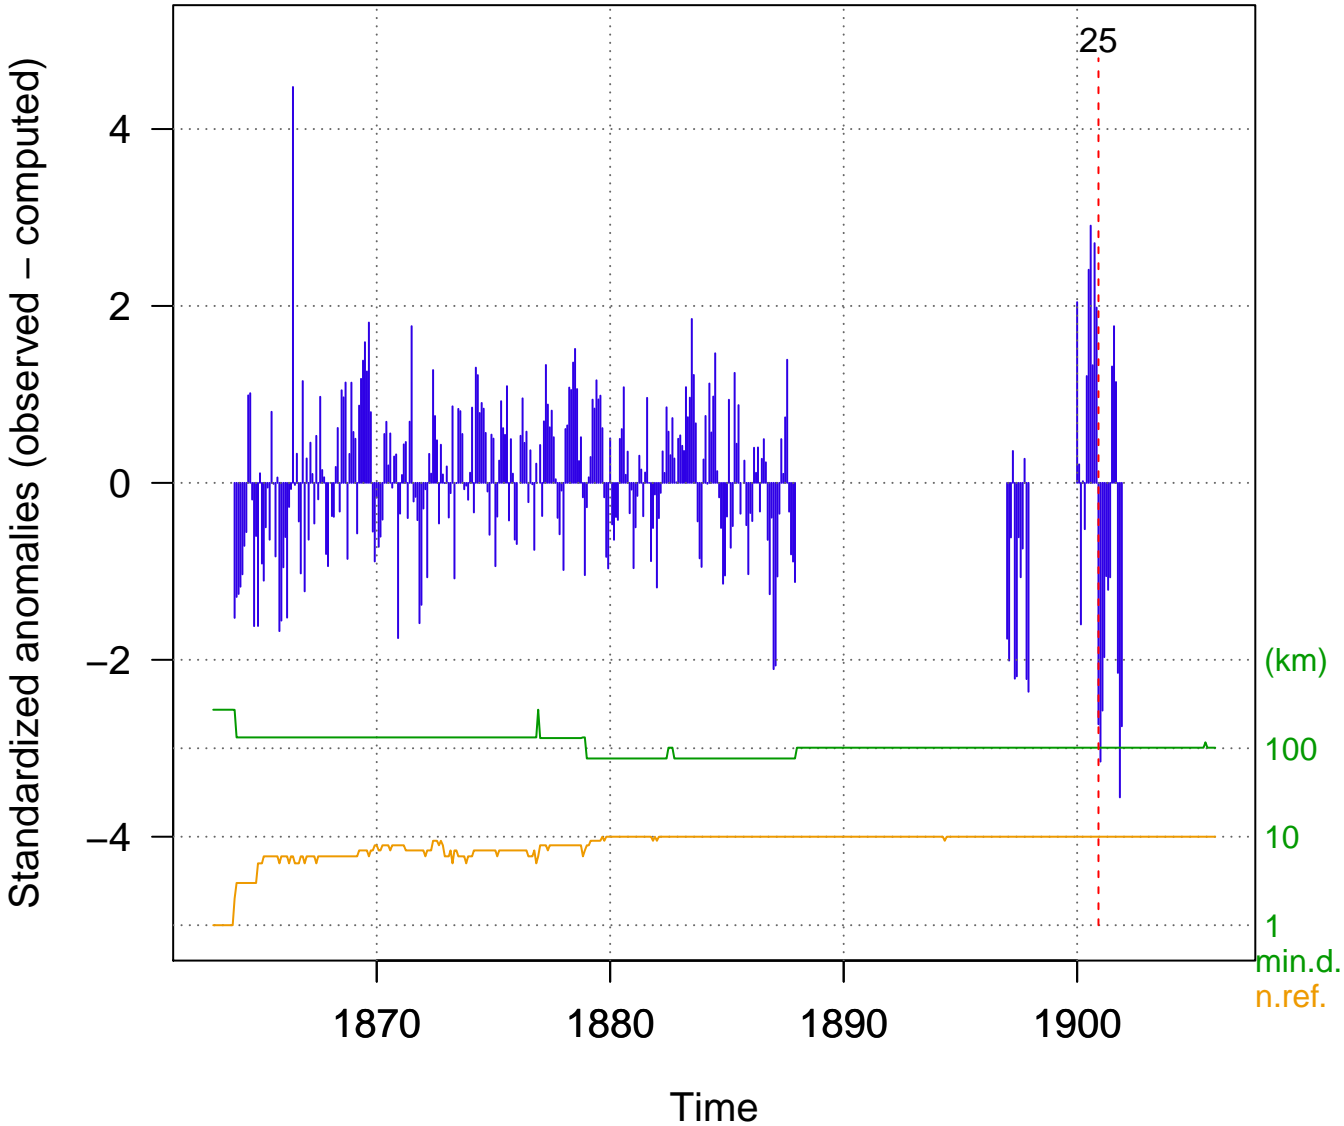

# O3 40 (Guarda-4) Guarda-4

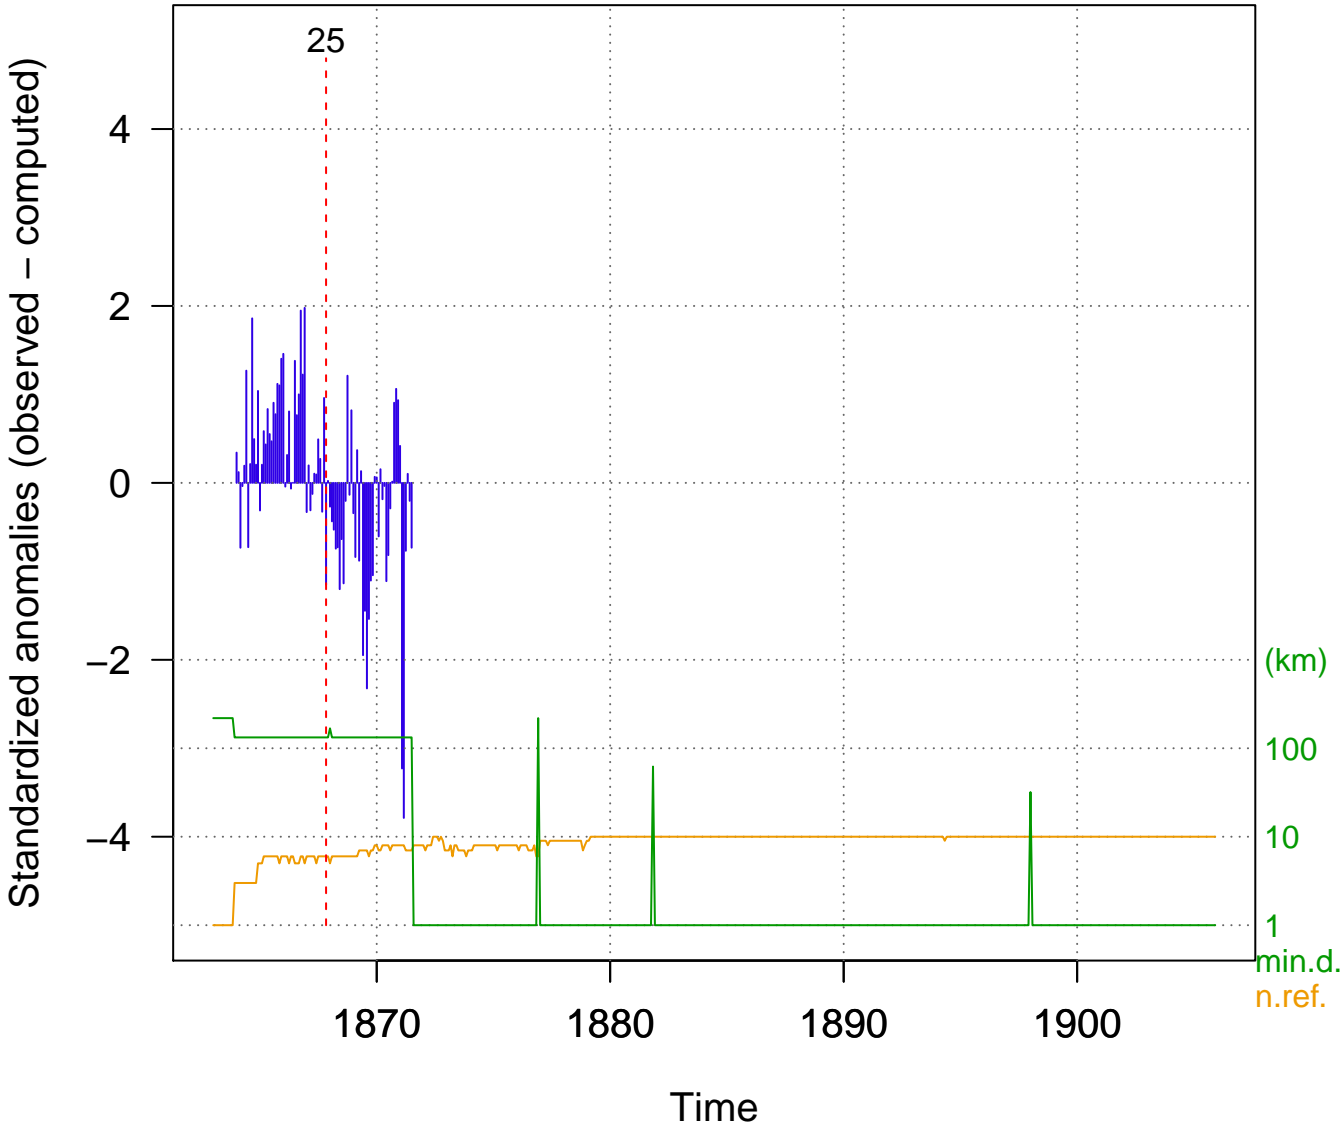

# O3 50 (Infante\_D\_Luiz-5)

Lisbon Infante D. Luiz-5

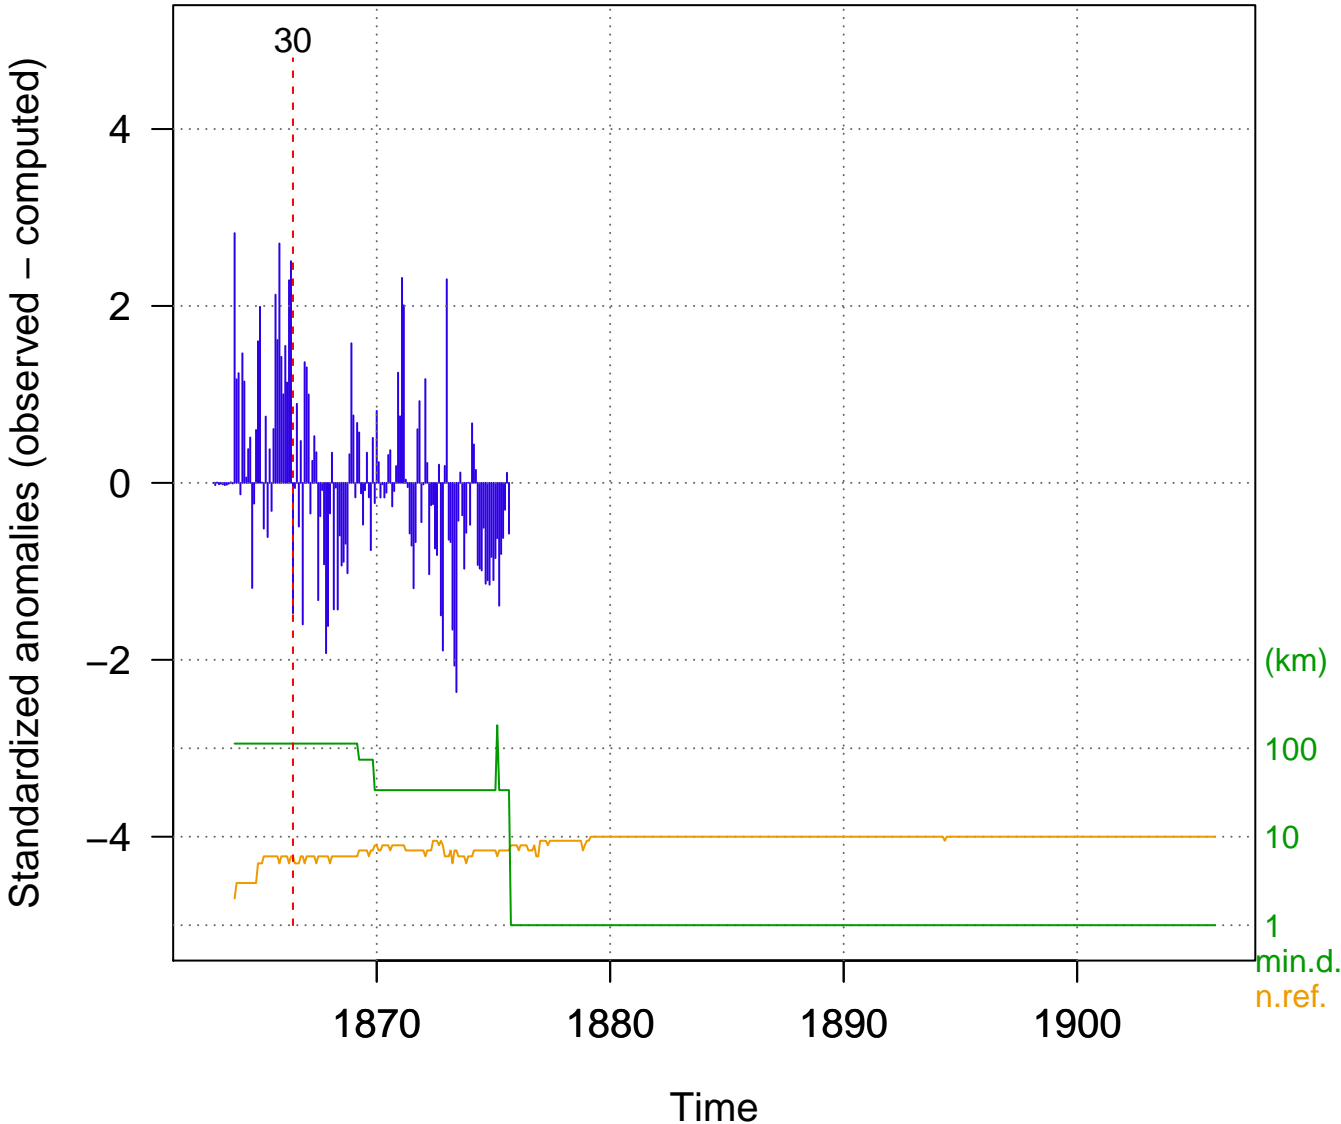

# O3 58 (Porto-2) Porto-2

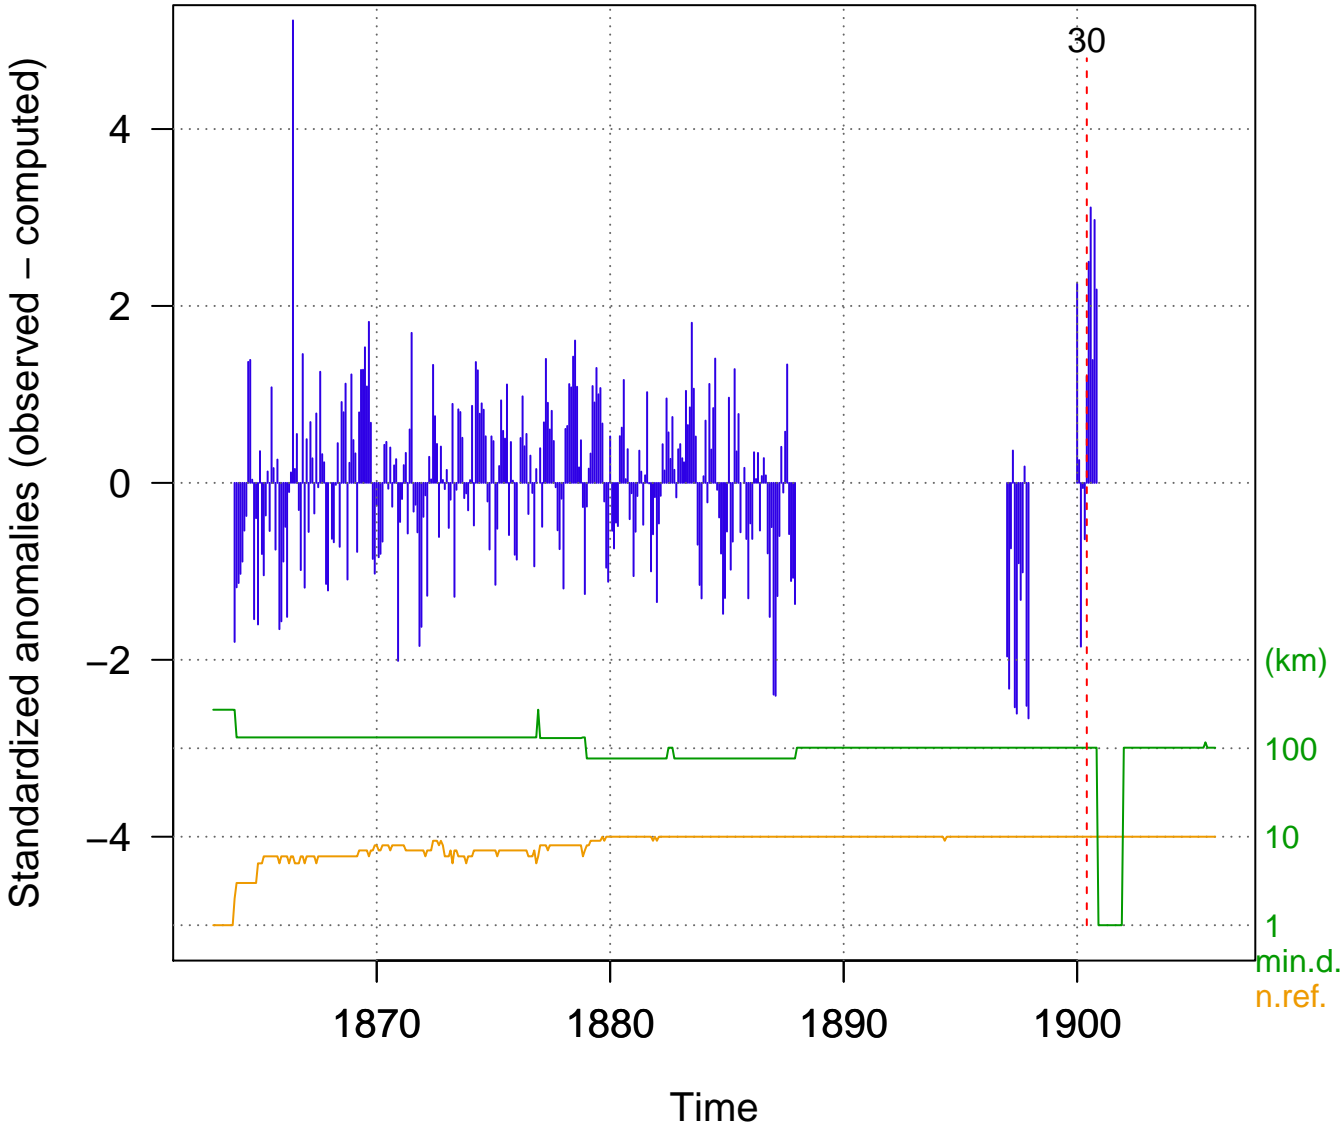

**O3 33 (Guarda-2)**  
**Guarda-2**

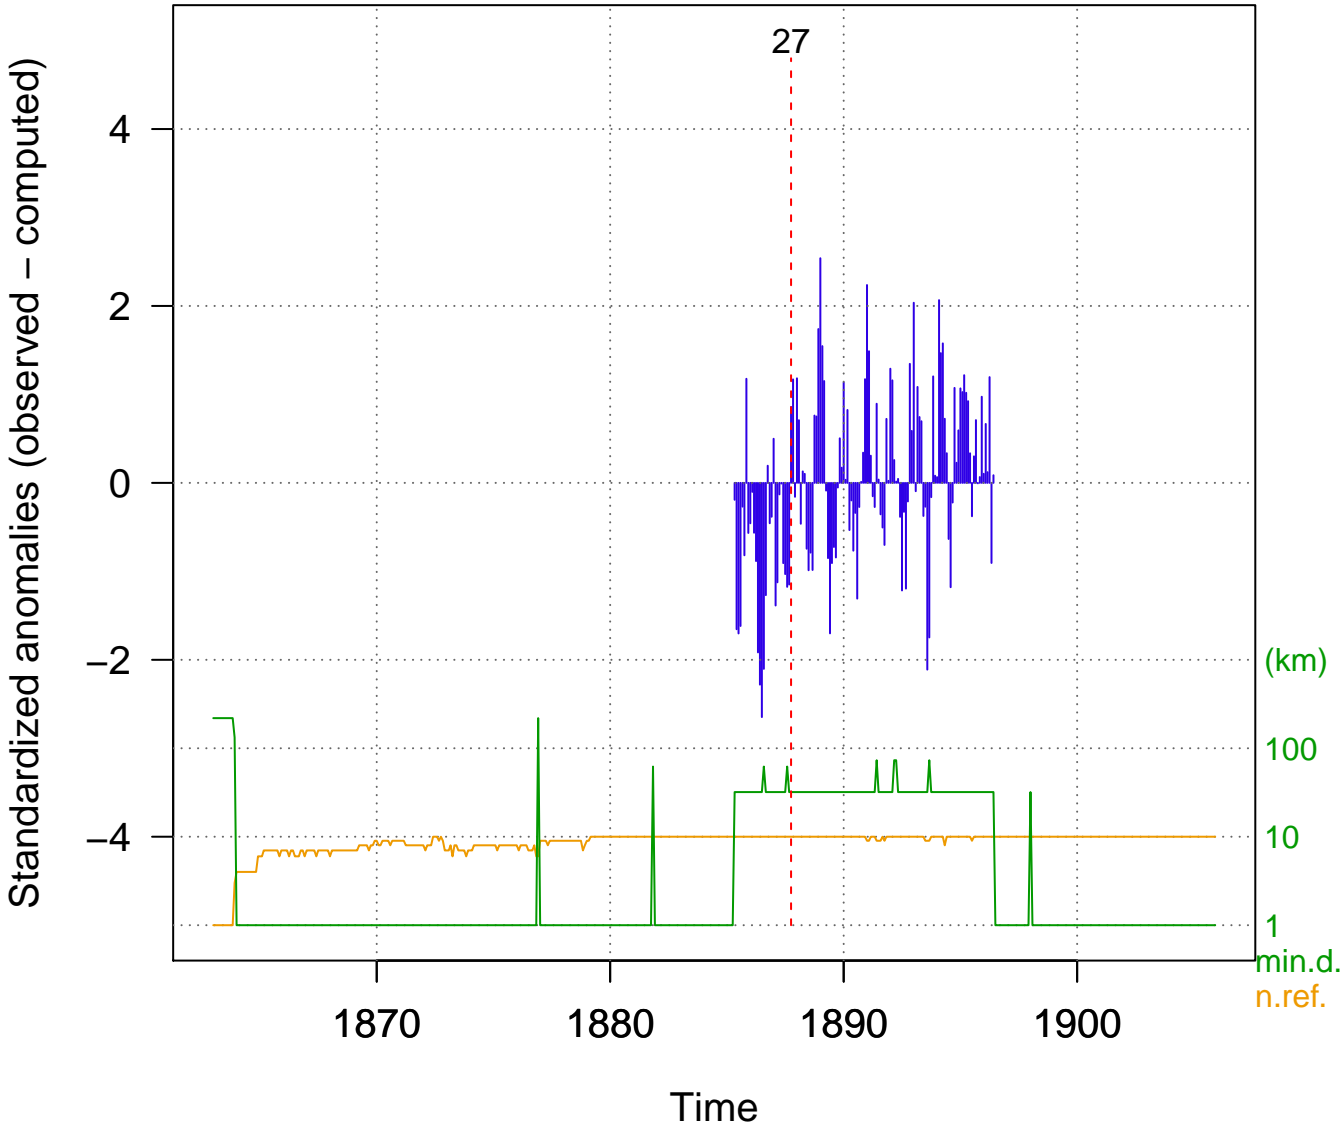

# O3 15 (Ponta\_Delgada) Ponta Delgada

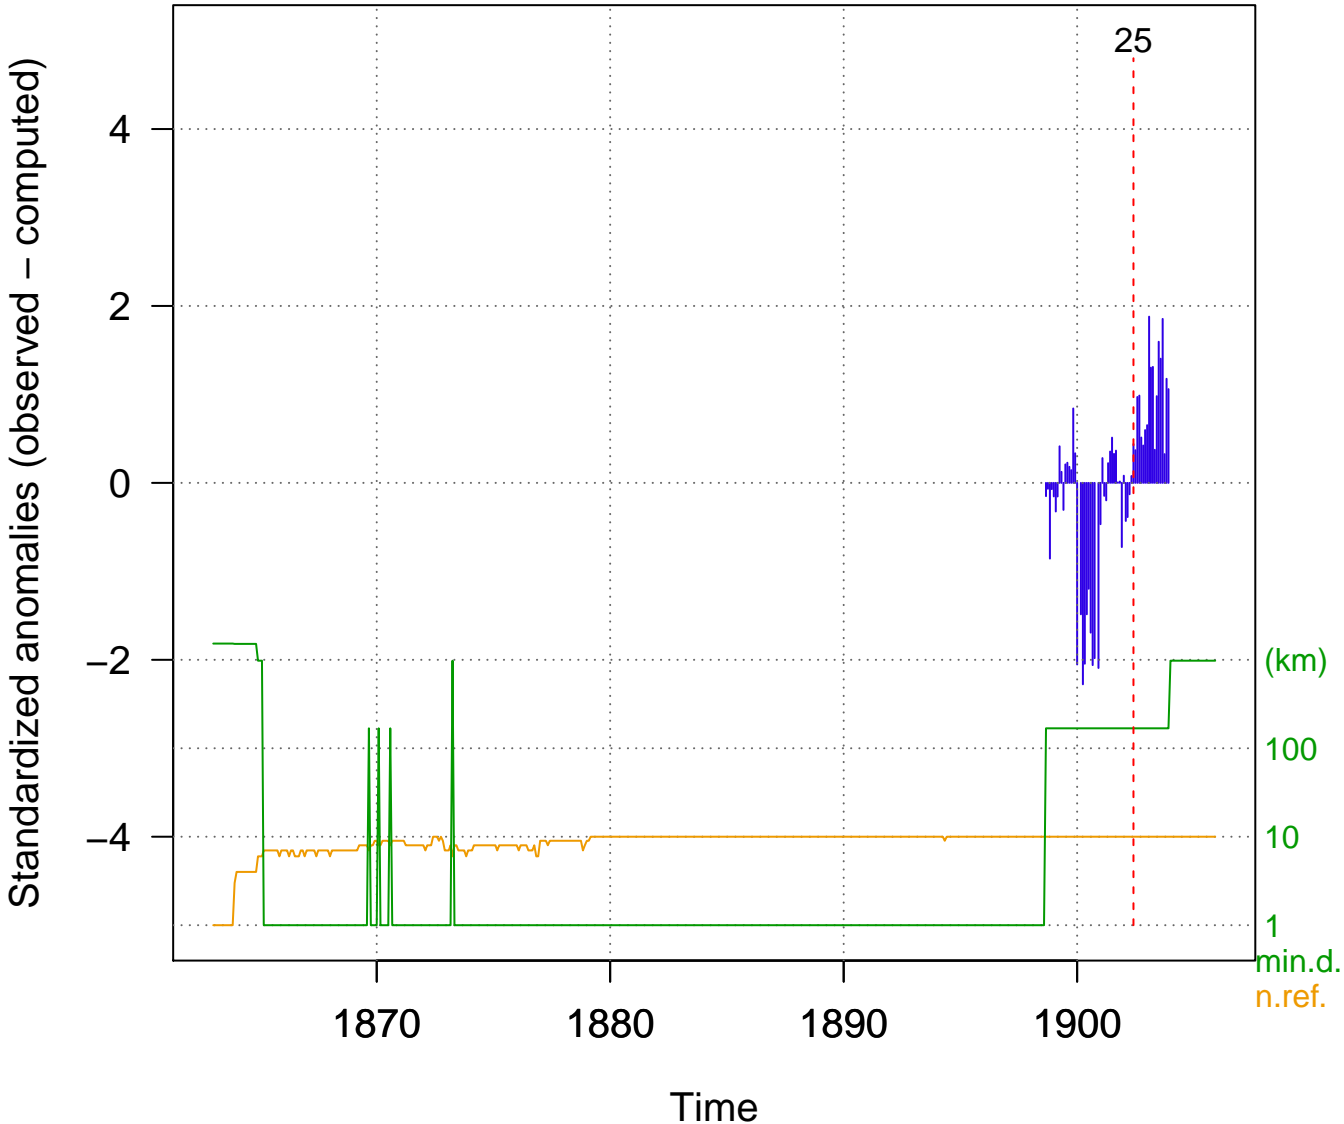



# O3 58 (Porto-2) Porto-2

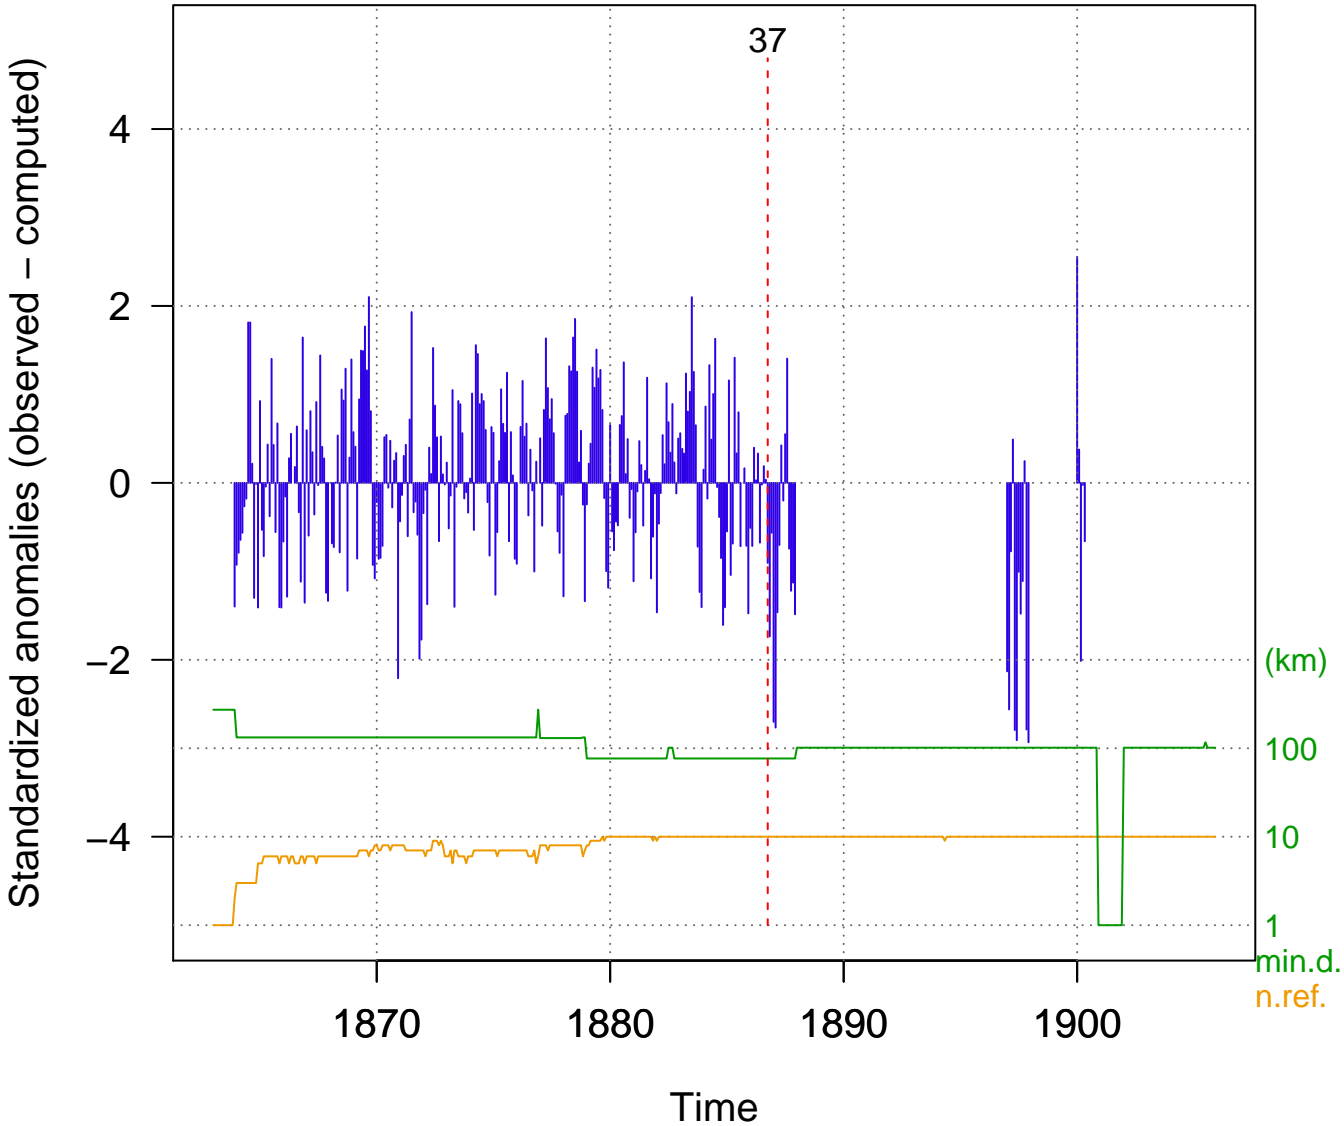

**O3 47 (Campo\_Maior-3)**  
**Campo Maior-3**

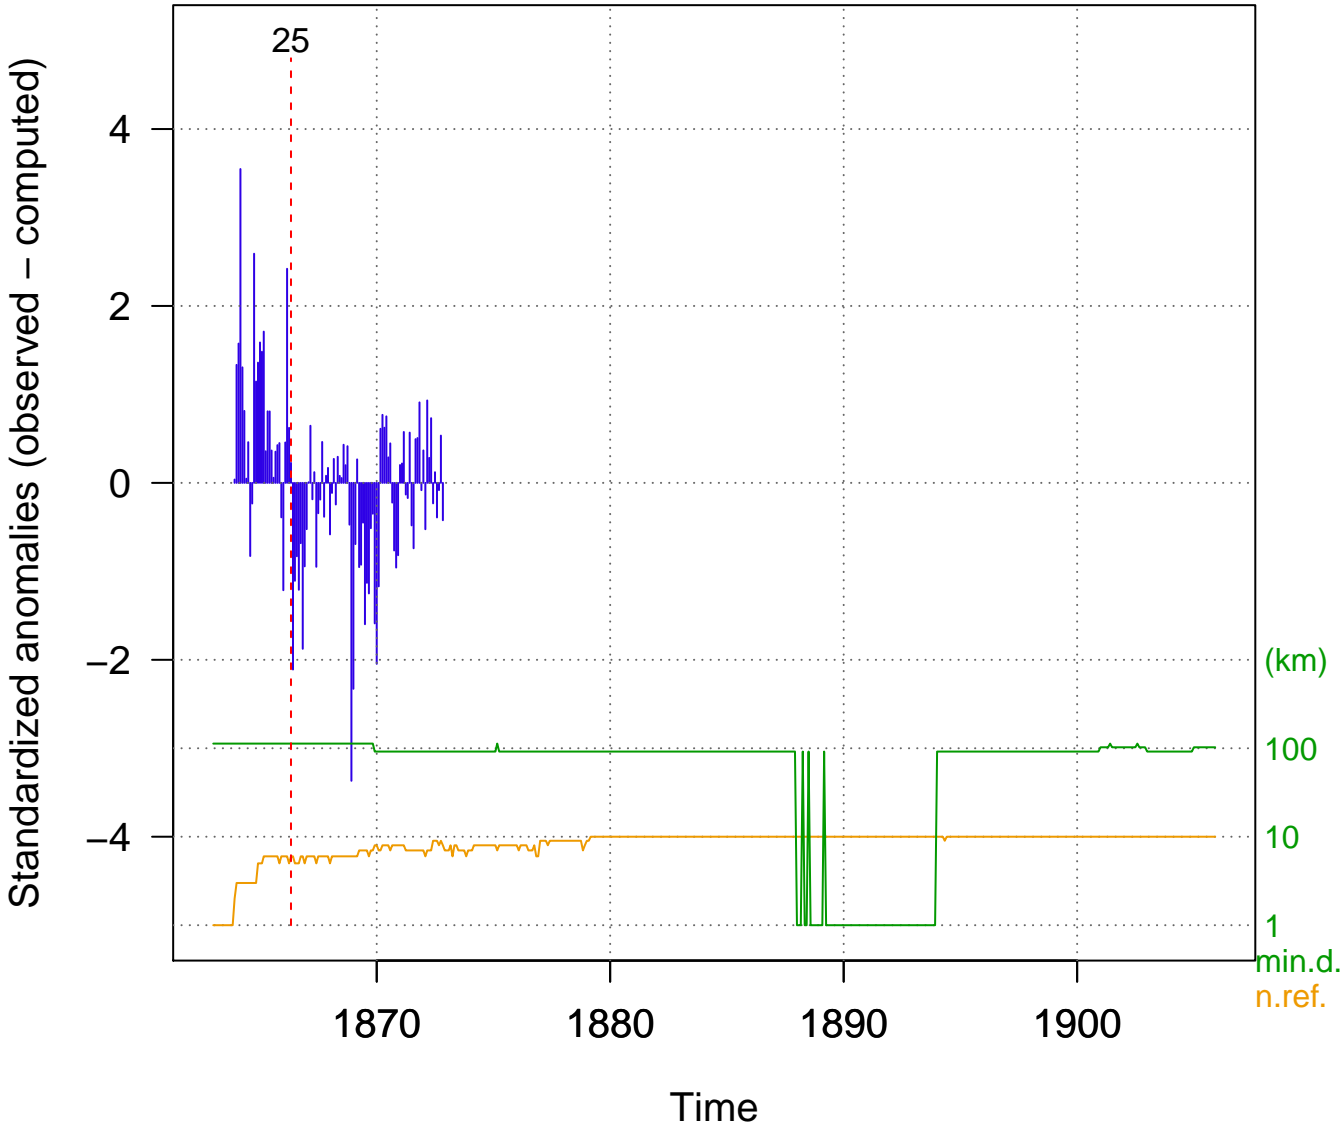

# O3 35 (Funchal-2) Funchal-2

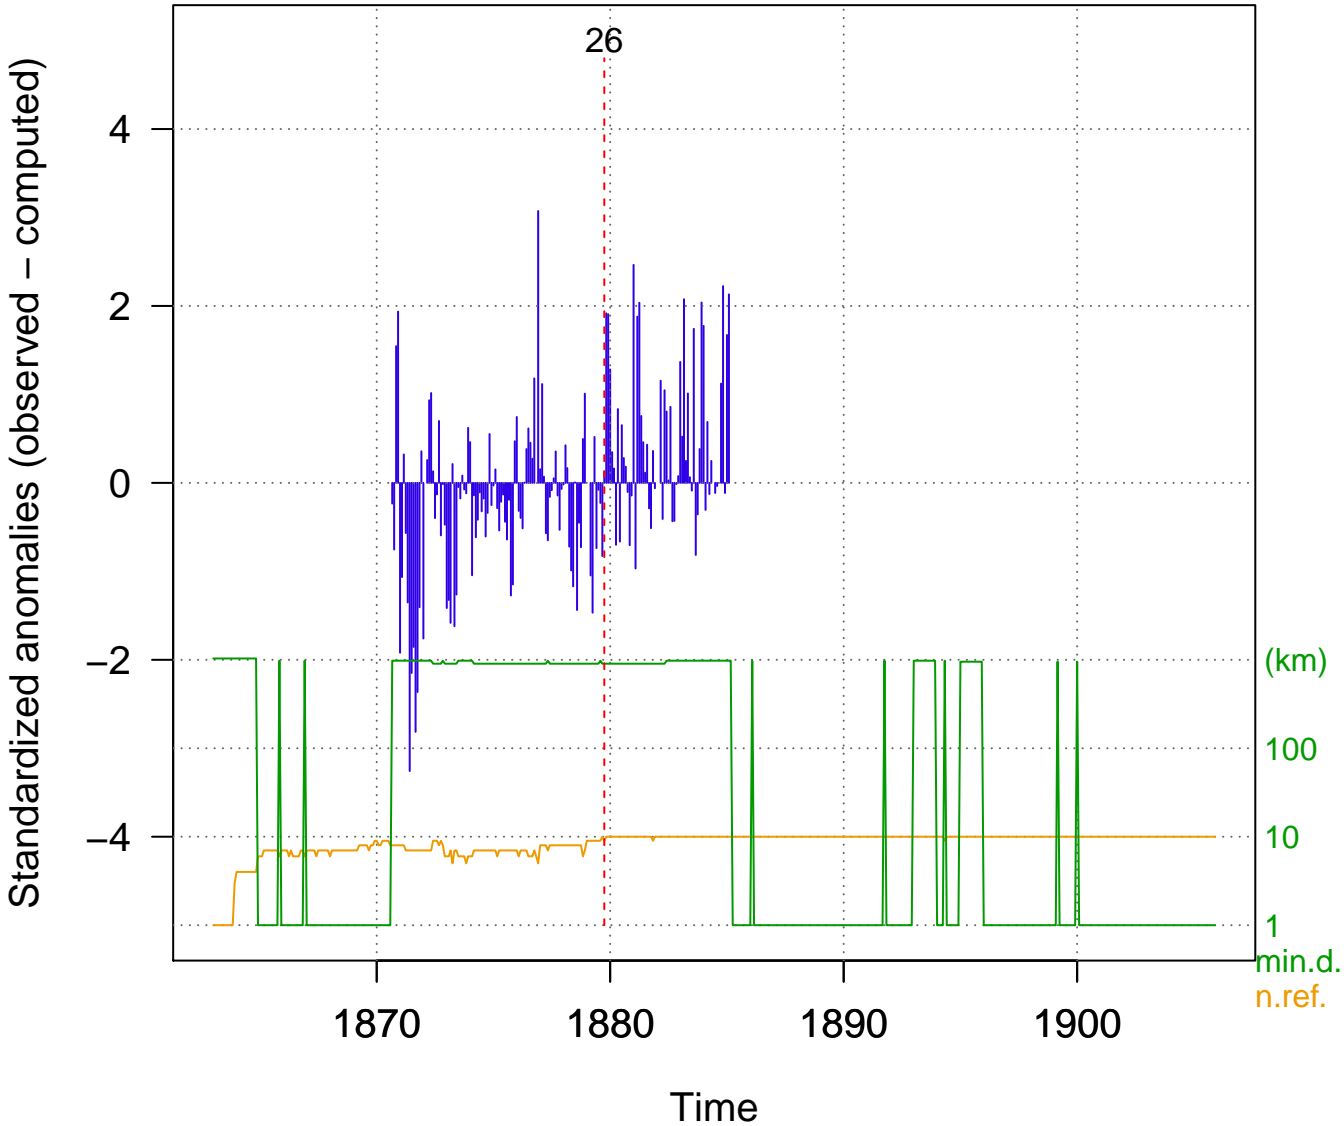

**Histogram of maximum SNHT (Stage 2)**

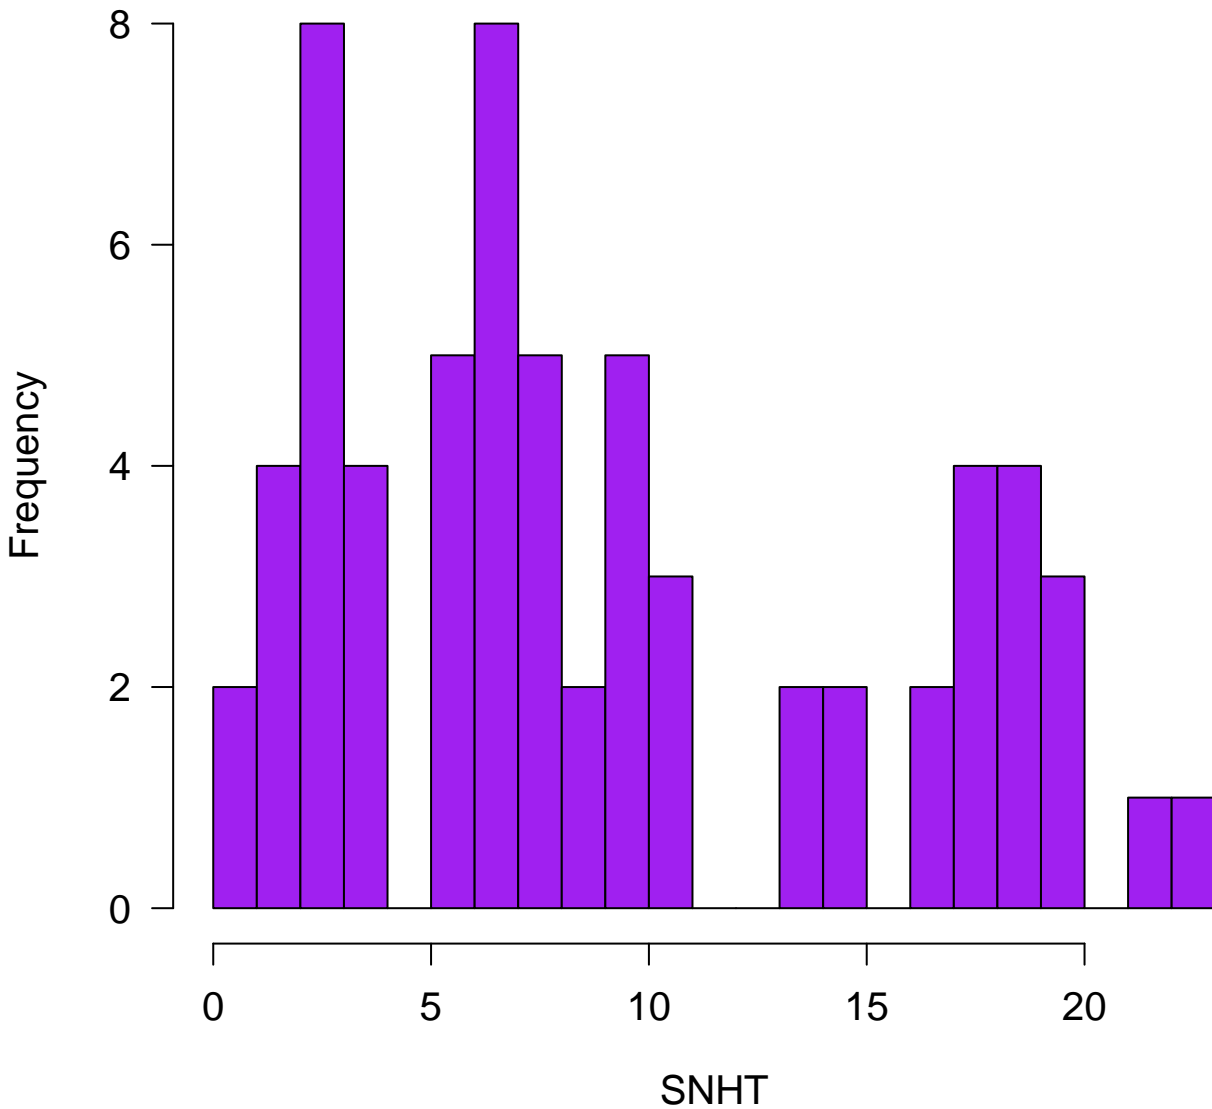

**Number of splits per station**

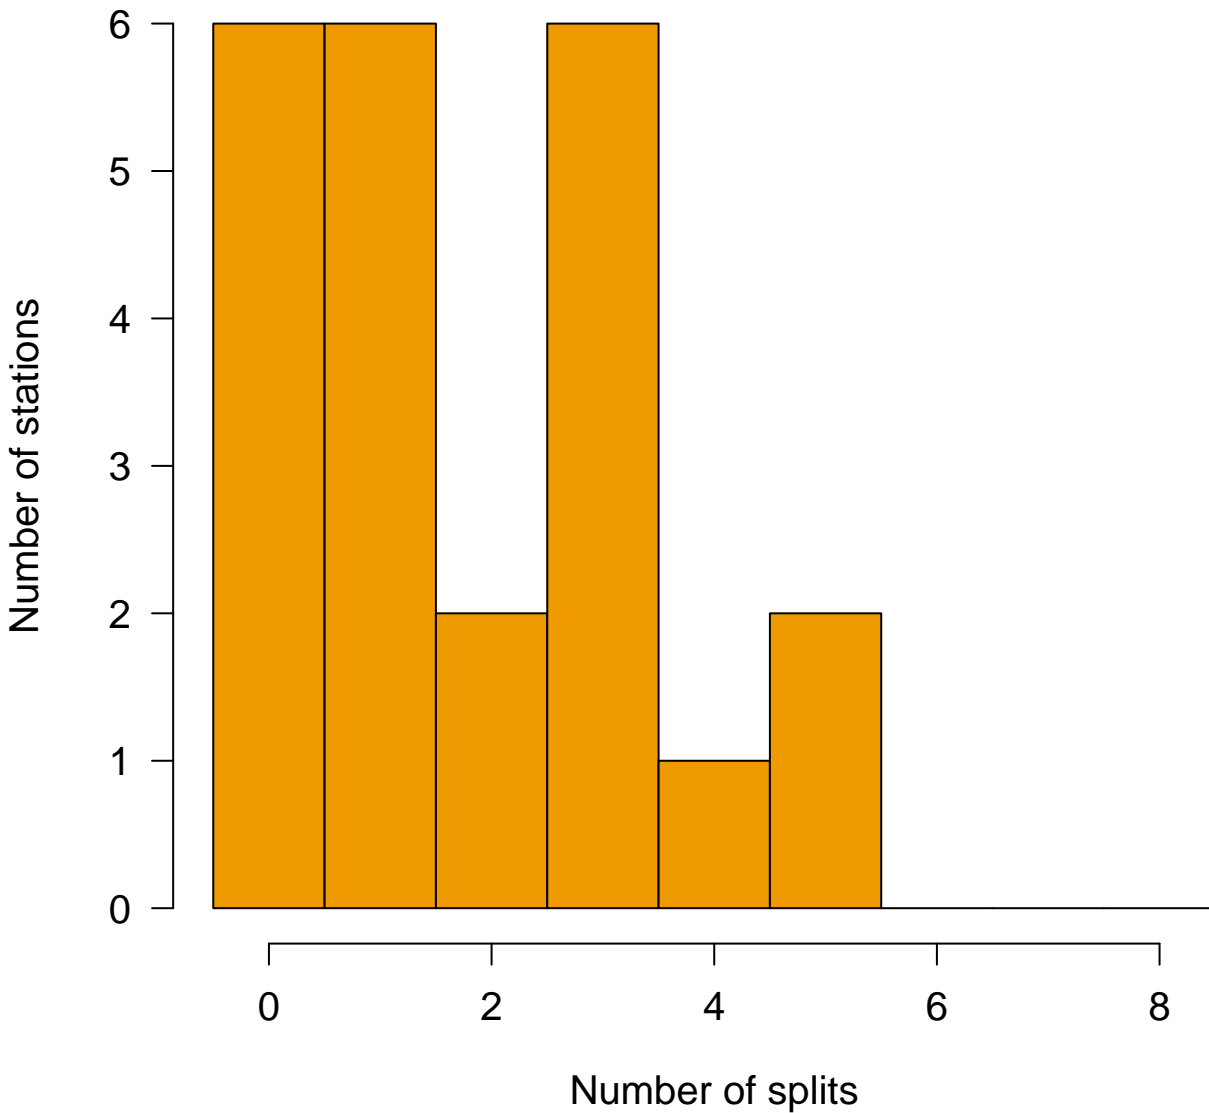

# Number of splits per year

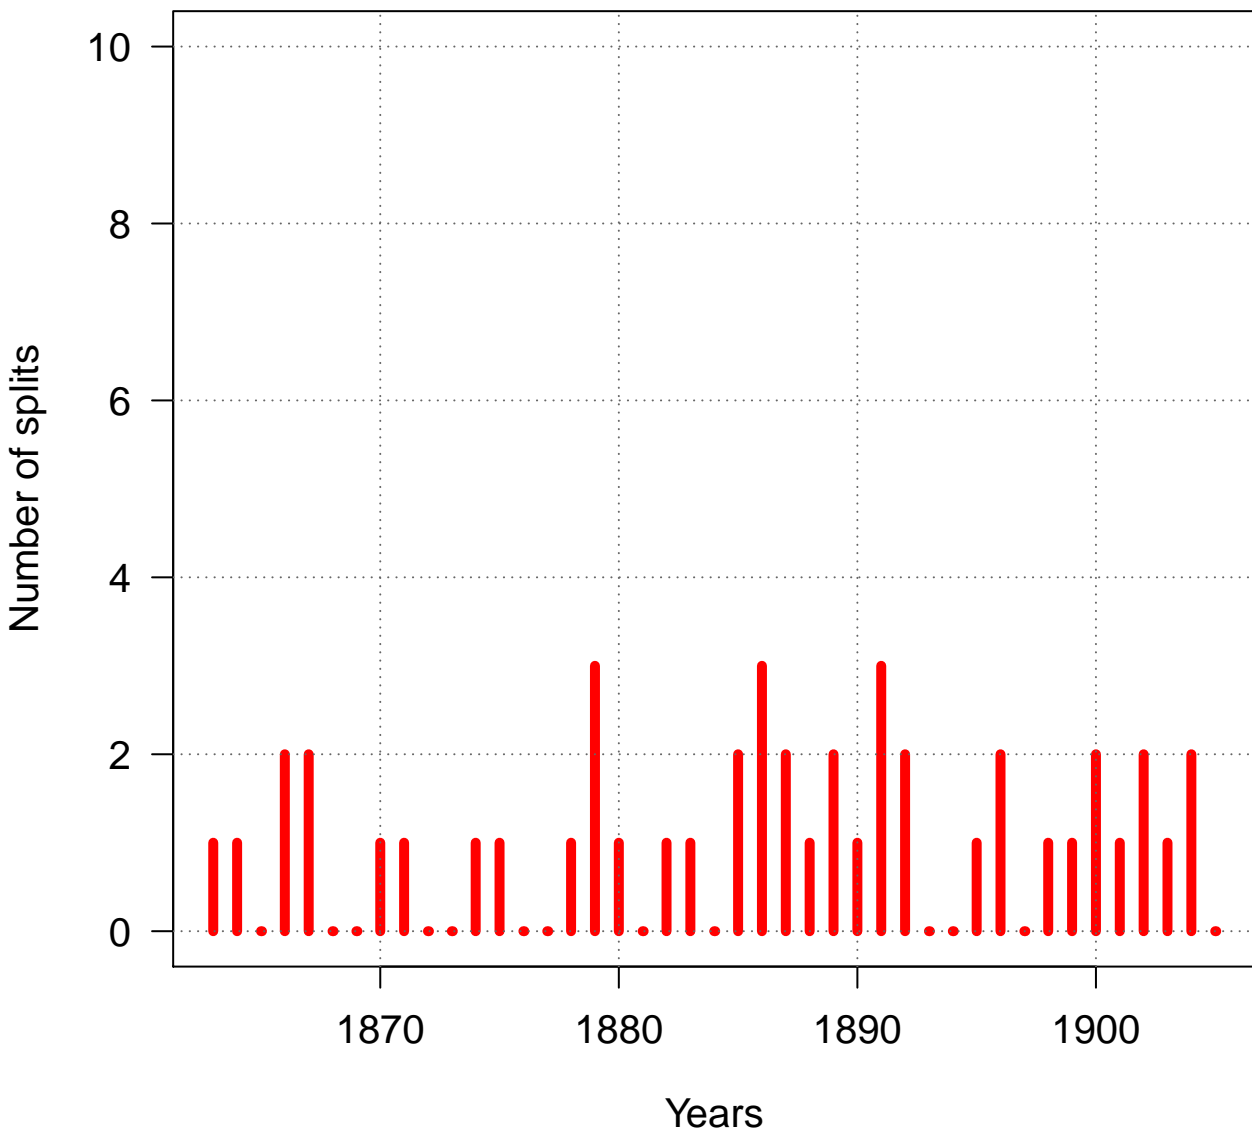

# Stage 3

Final anomalies of the  
homogenized series with  
 $wd = 100$  km and  $nref = 4$

# O3 1 (Montalegre) Montalegre

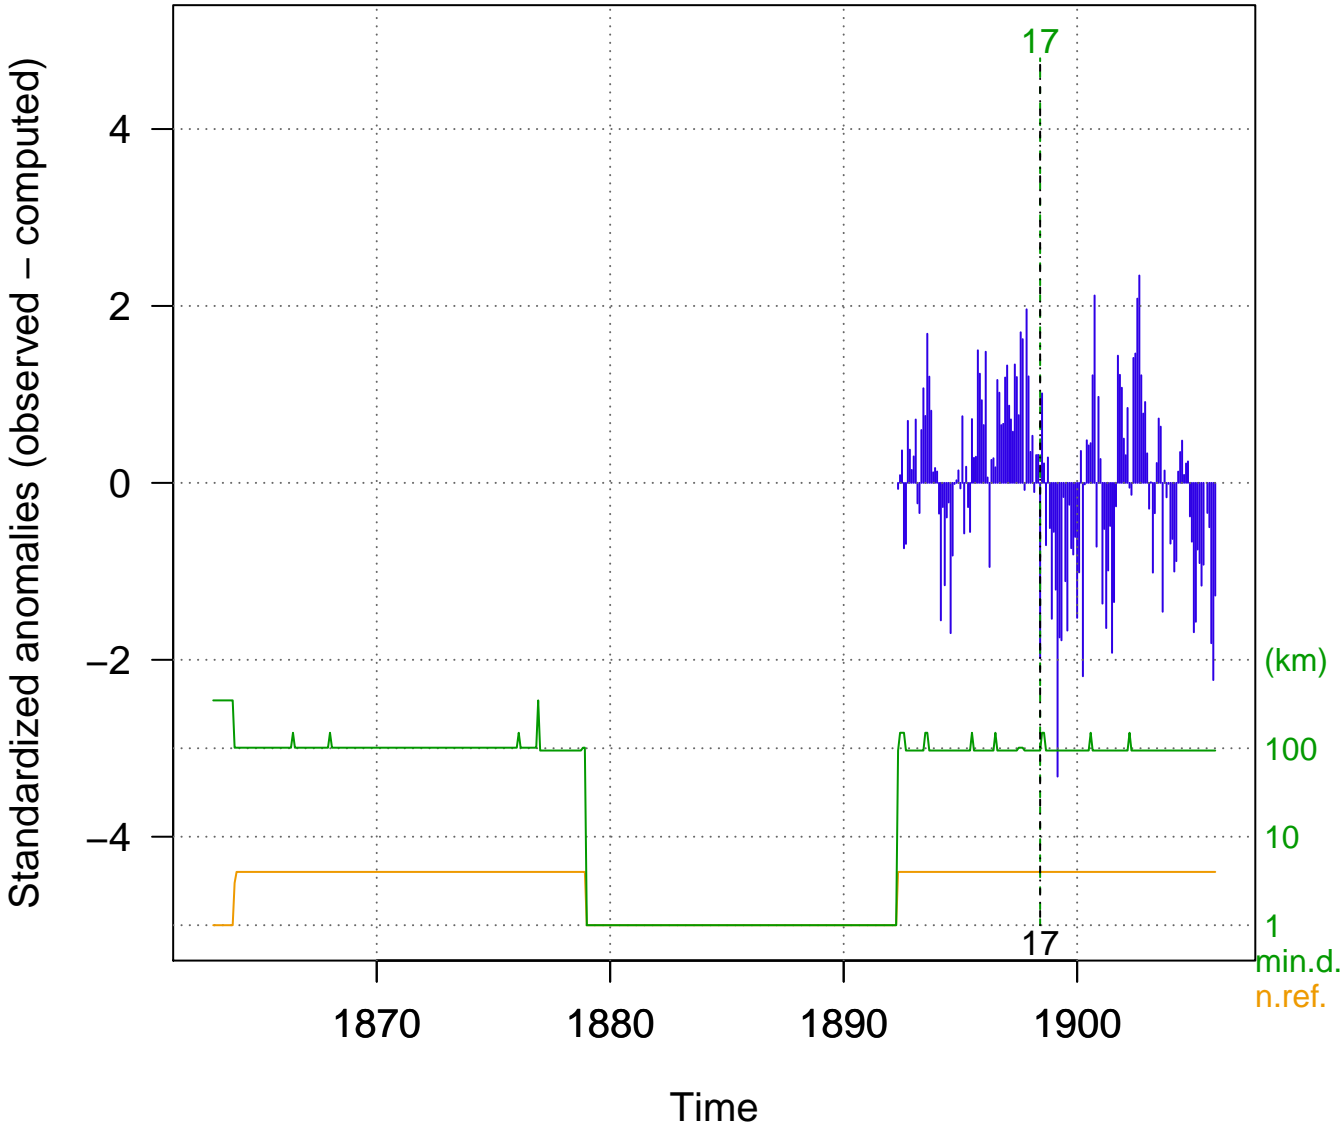



# O3 27 (Montalegre-2) Montalegre-2

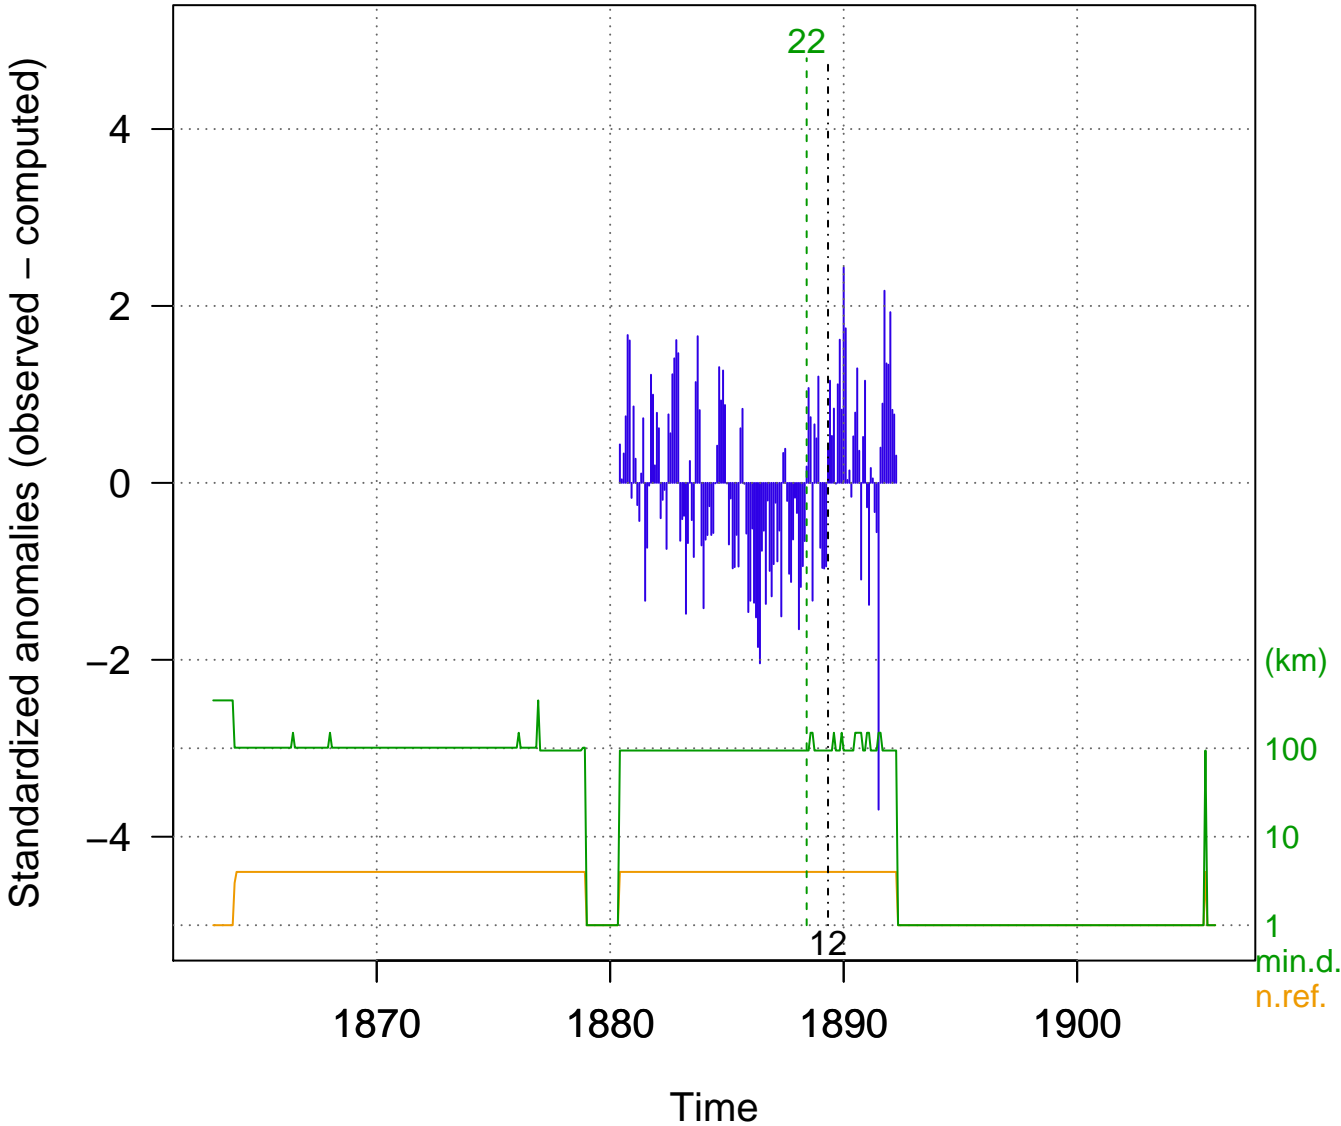

# O3 46 (Montalegre-3) Montalegre-3

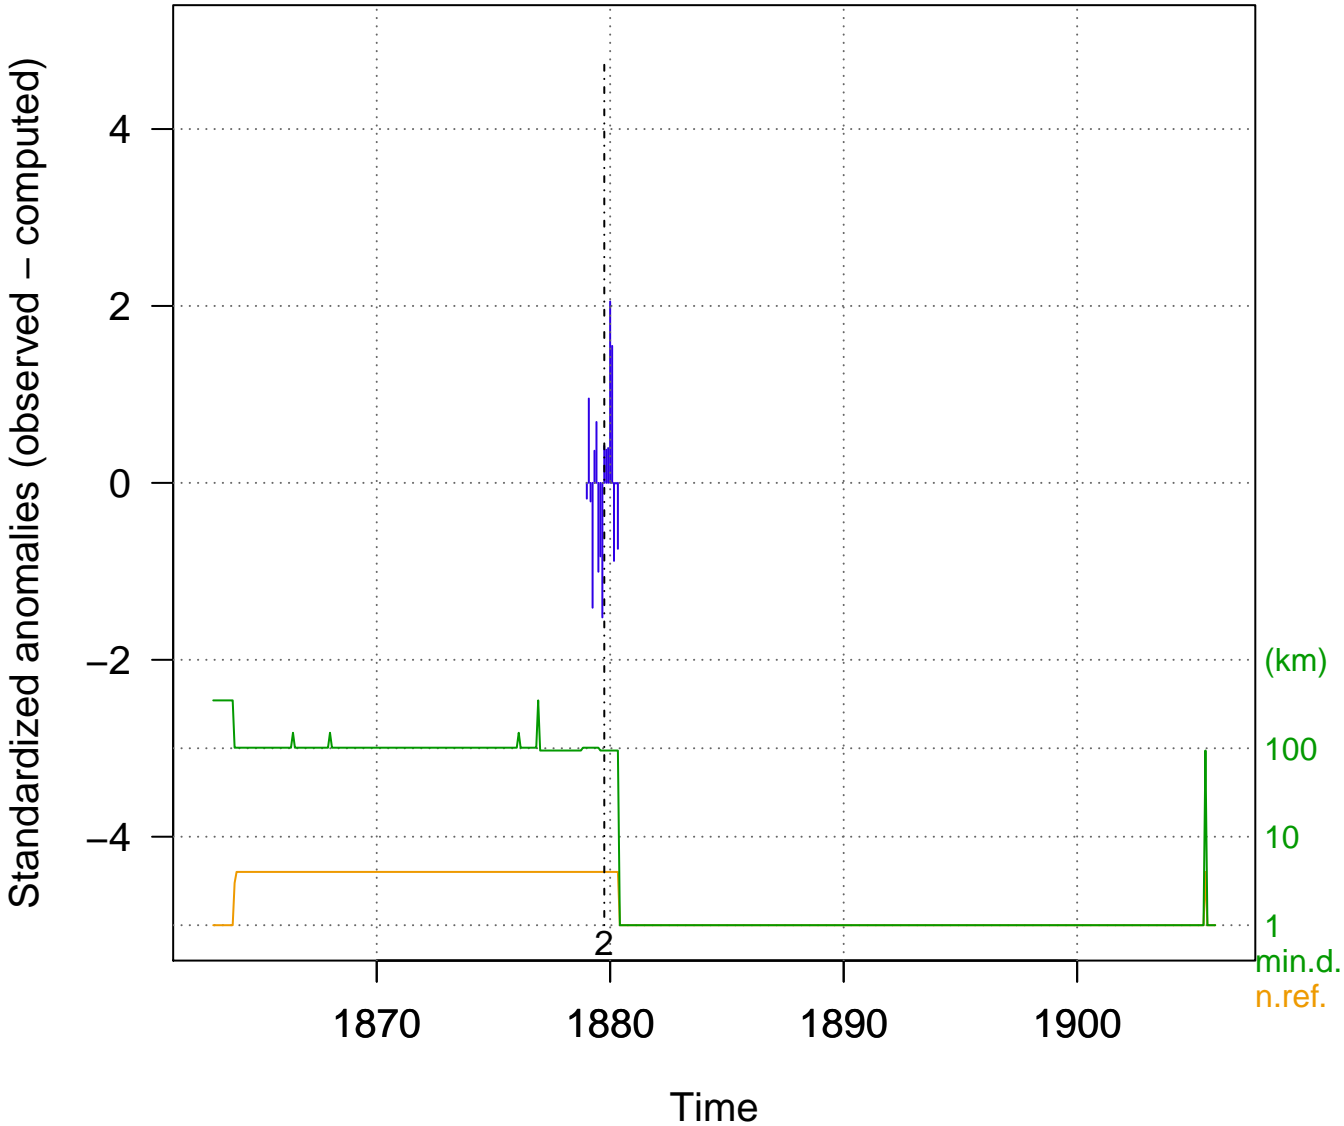

# Moncorvo

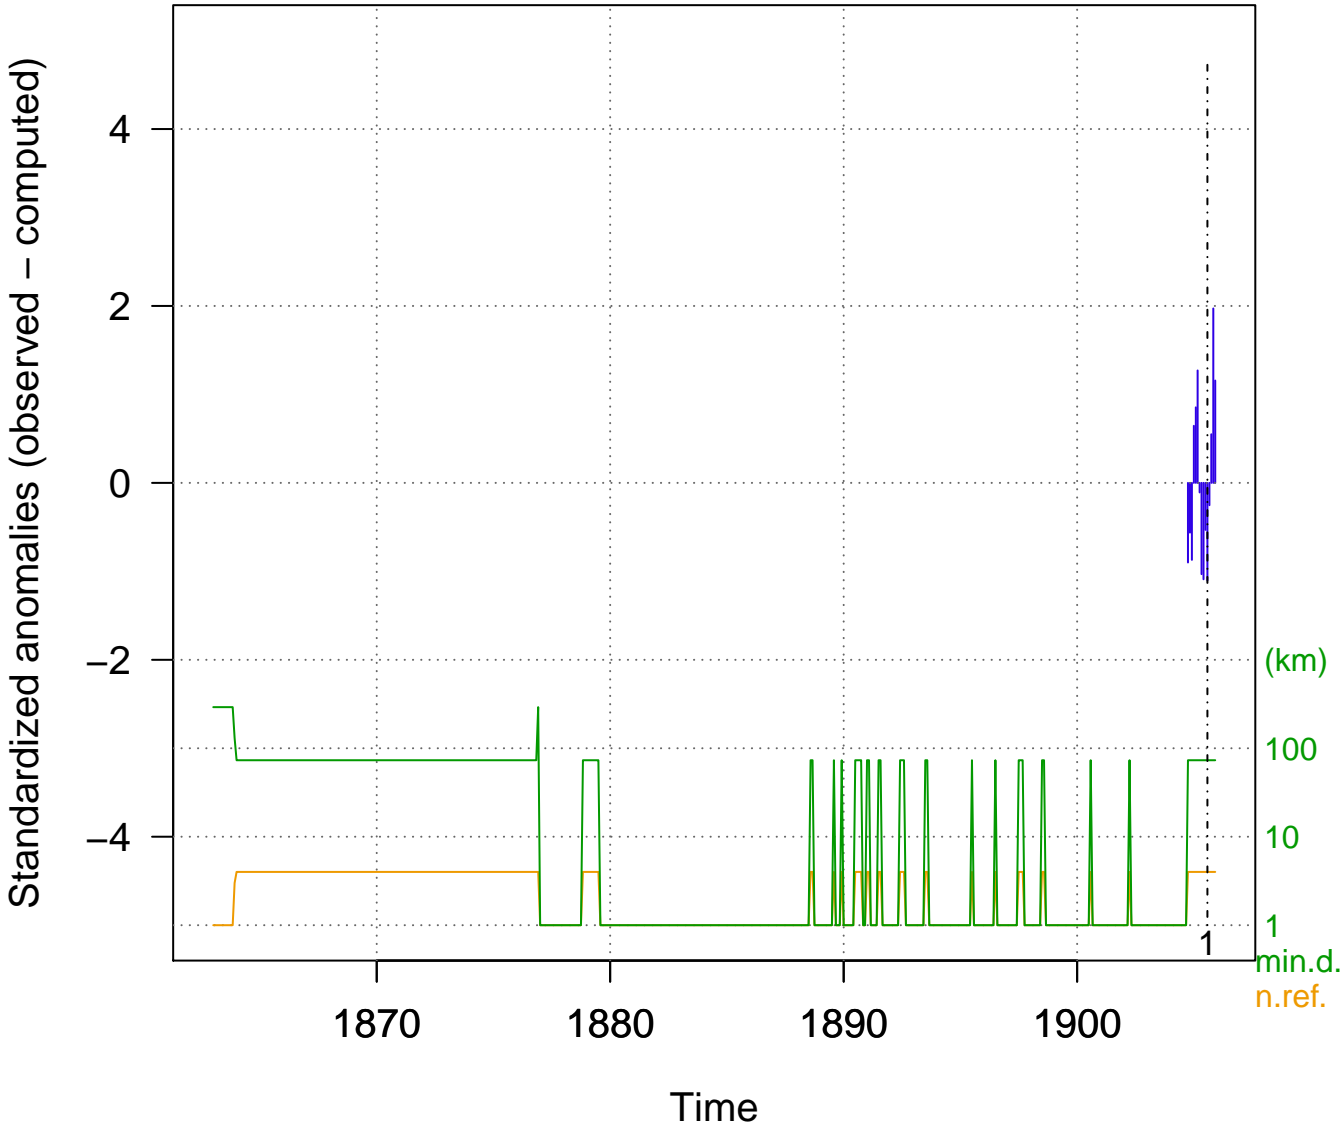

# O3 24 (Moncorvo-2) Moncorvo-2

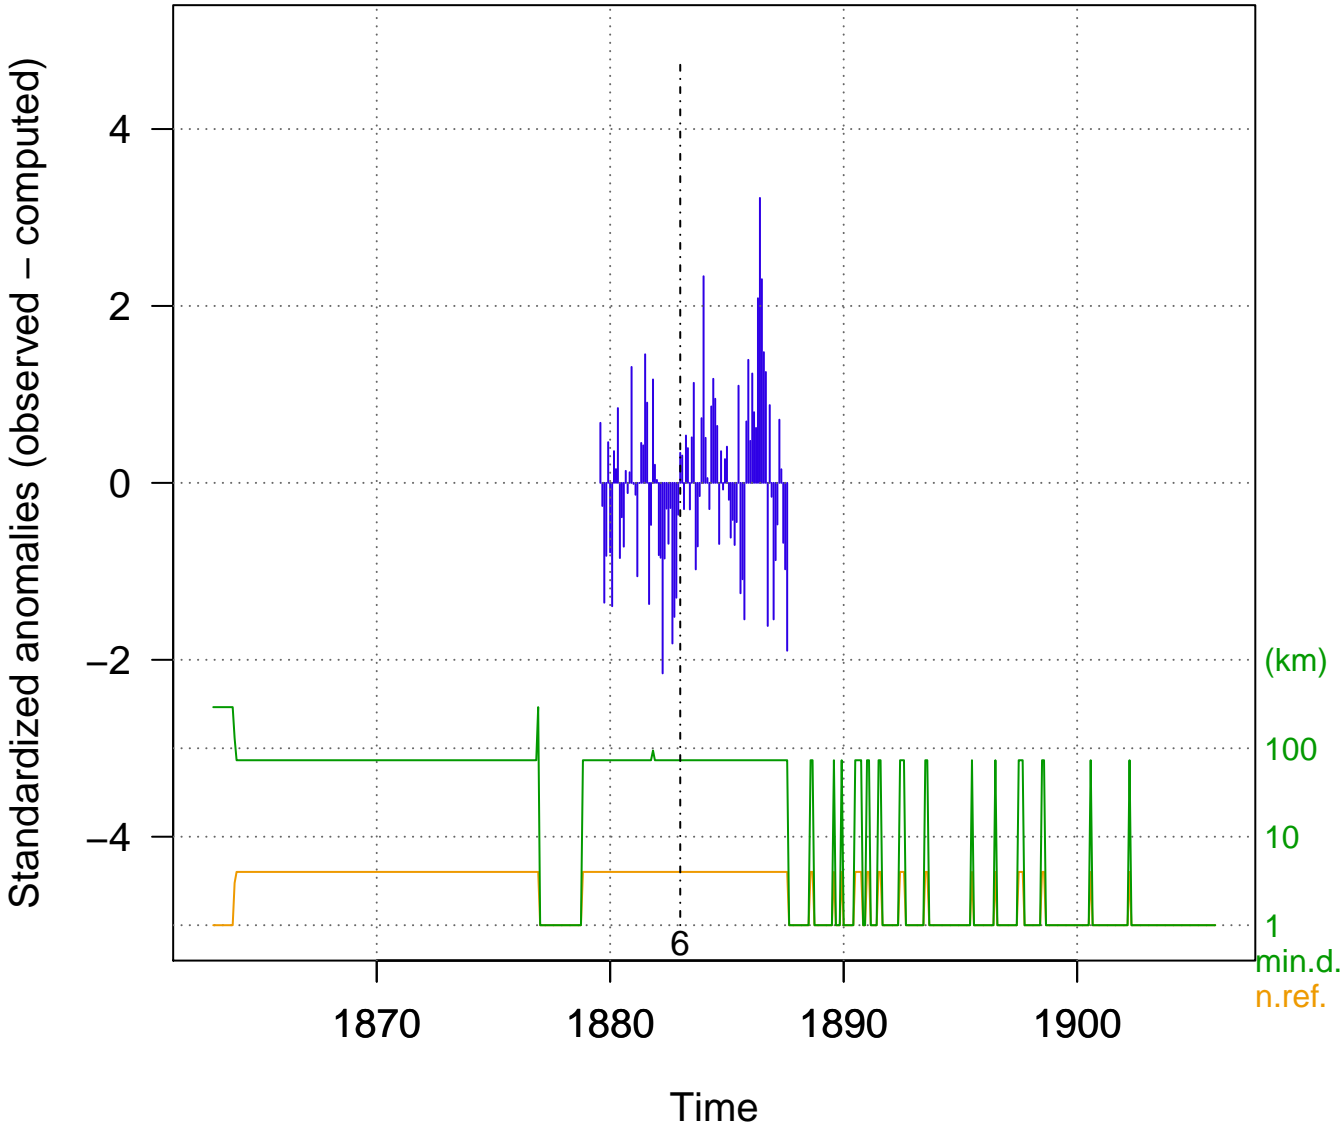

# O3 39 (Moncorvo-3) Moncorvo-3

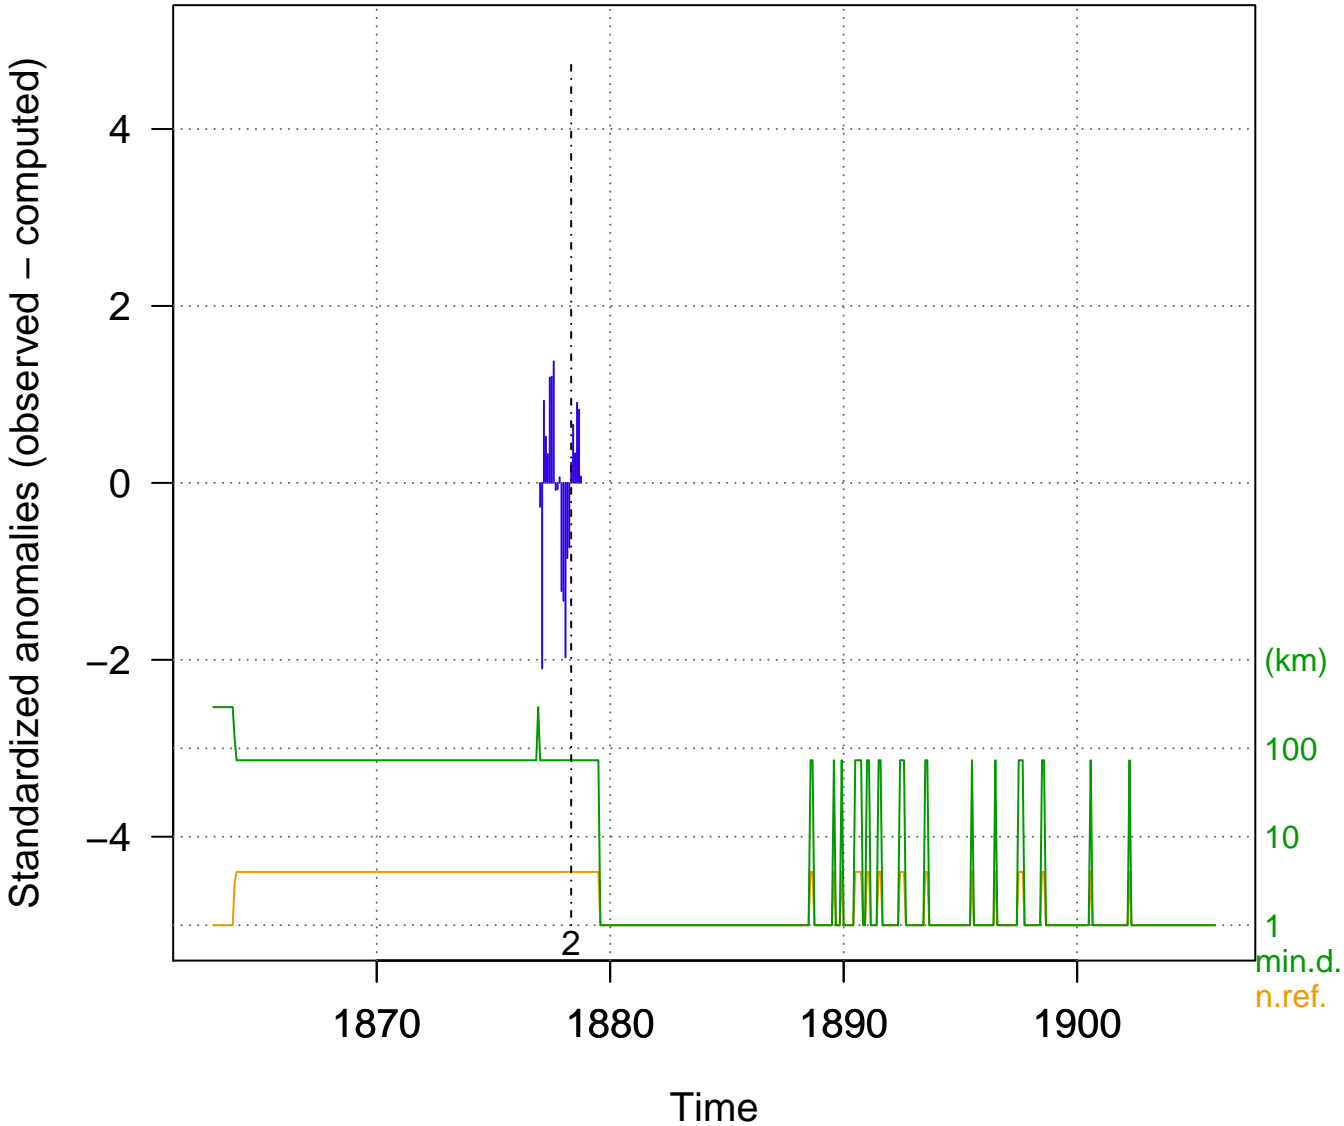

# O3 48 (Moncorvo-4) Moncorvo-4

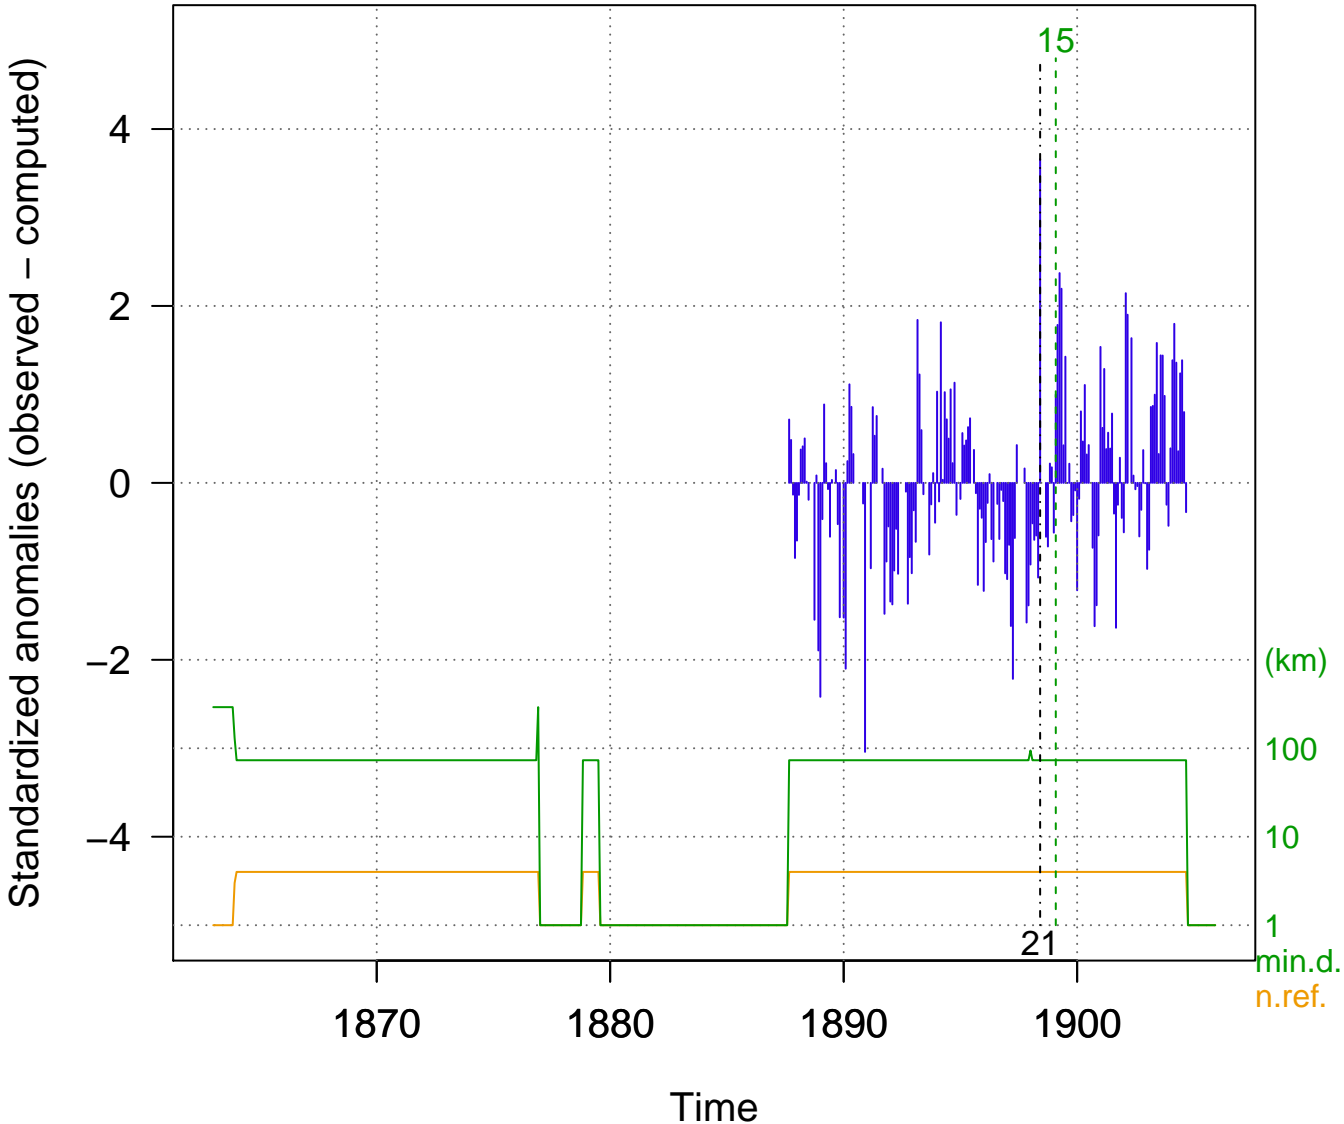

# O3 3 (Porto) Porto

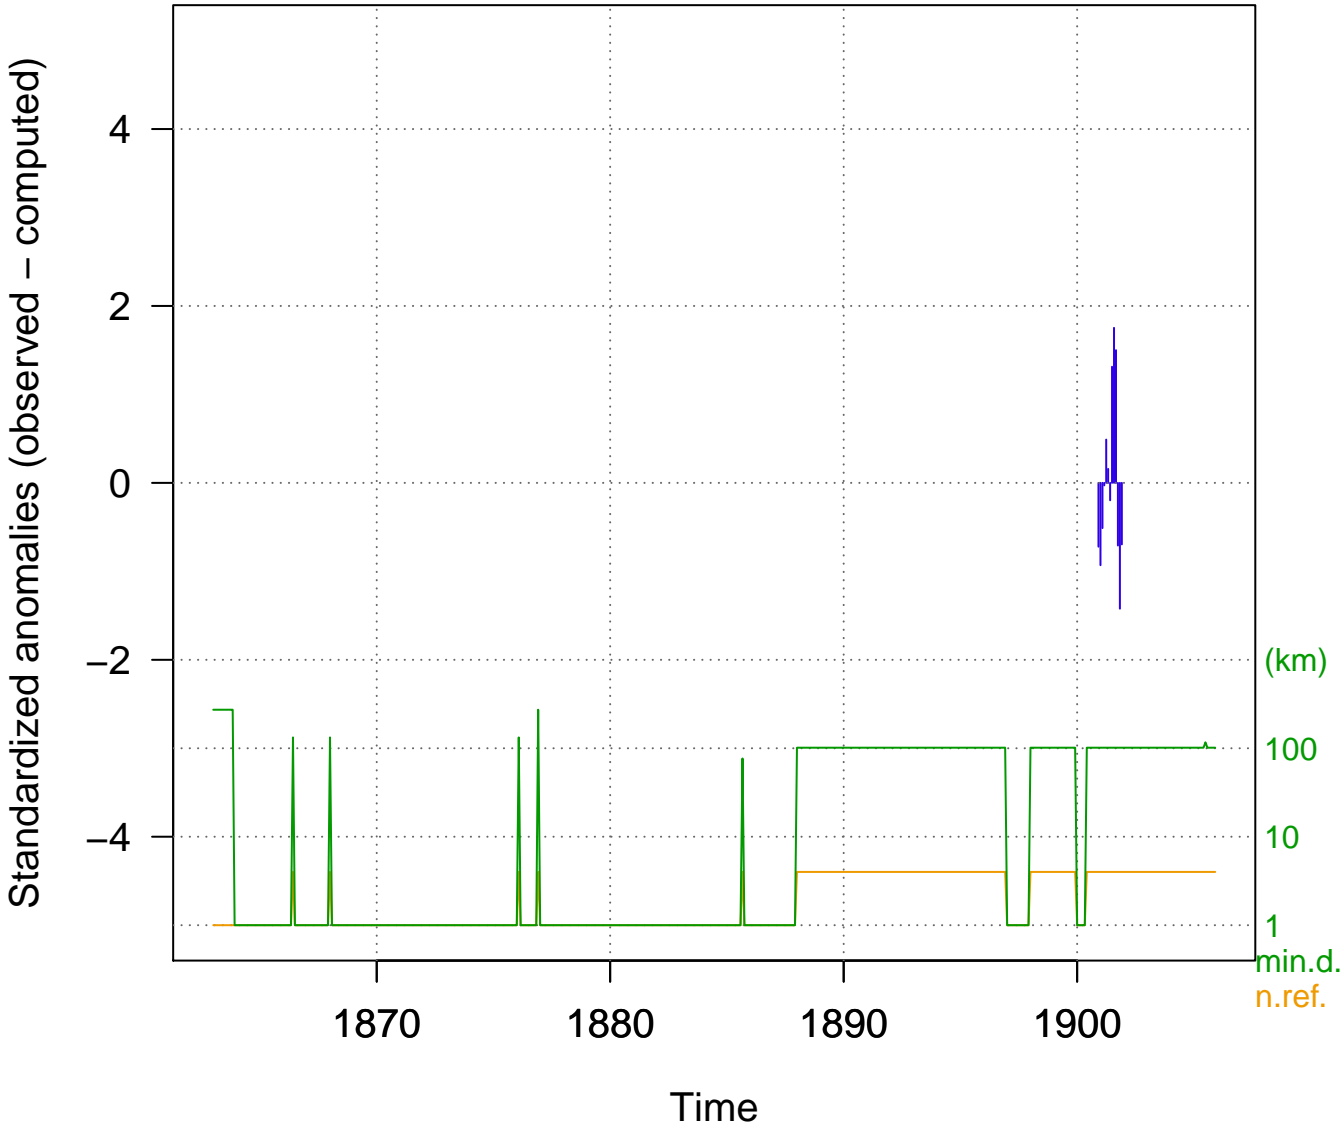

# O3 58 (Porto-2) Porto-2

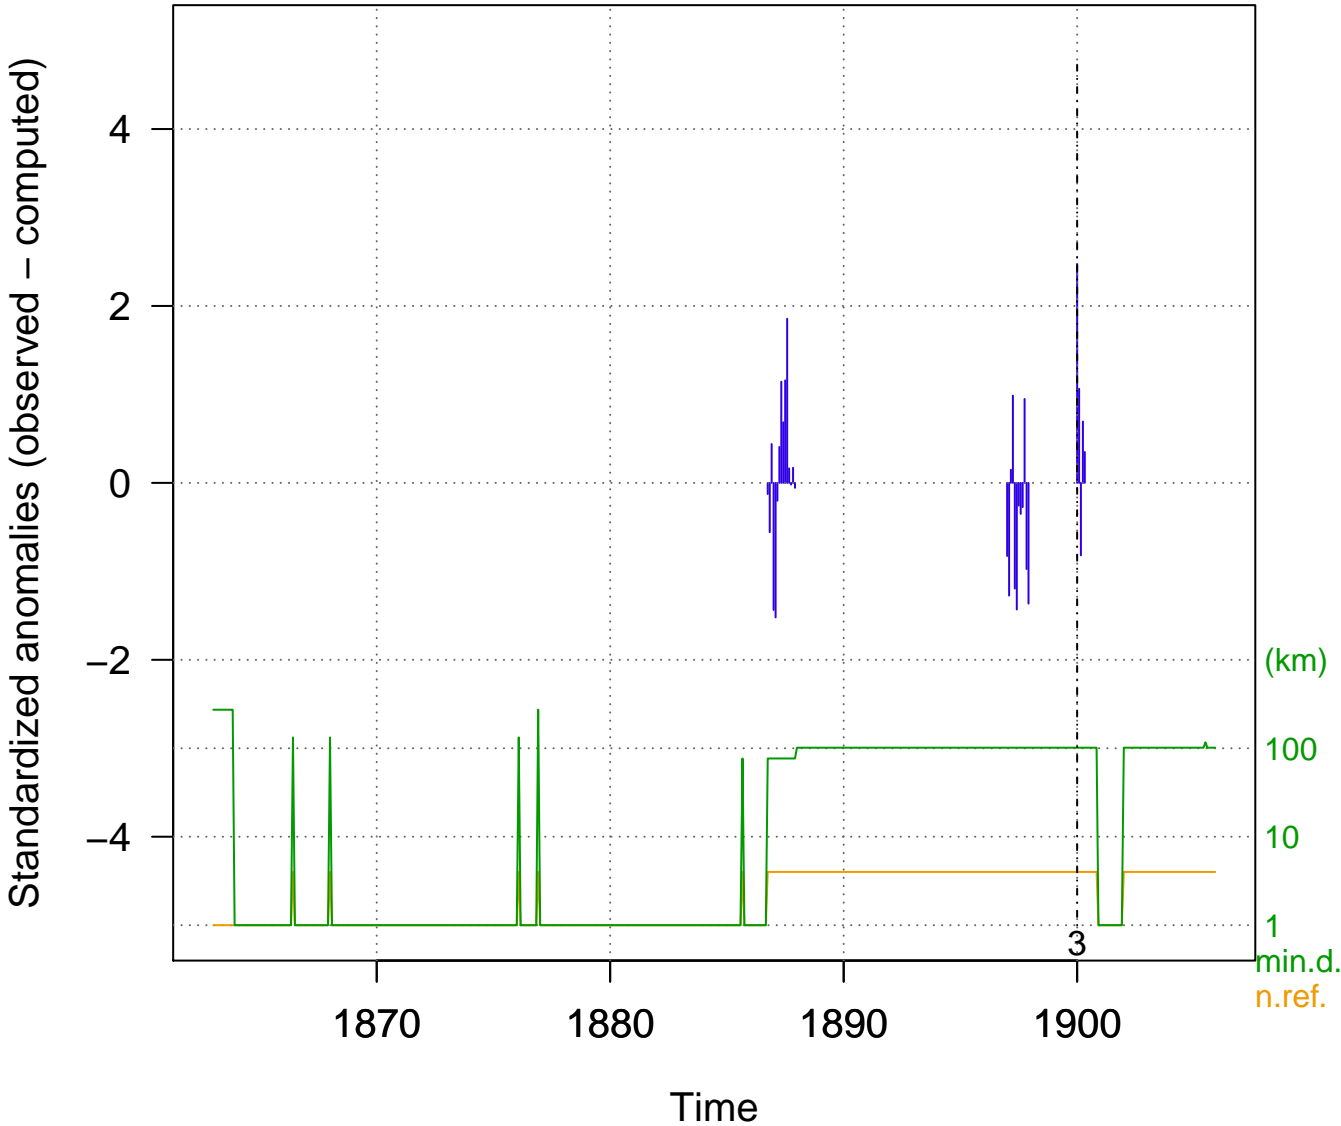



# O3 63 (Porto-3) Porto-3

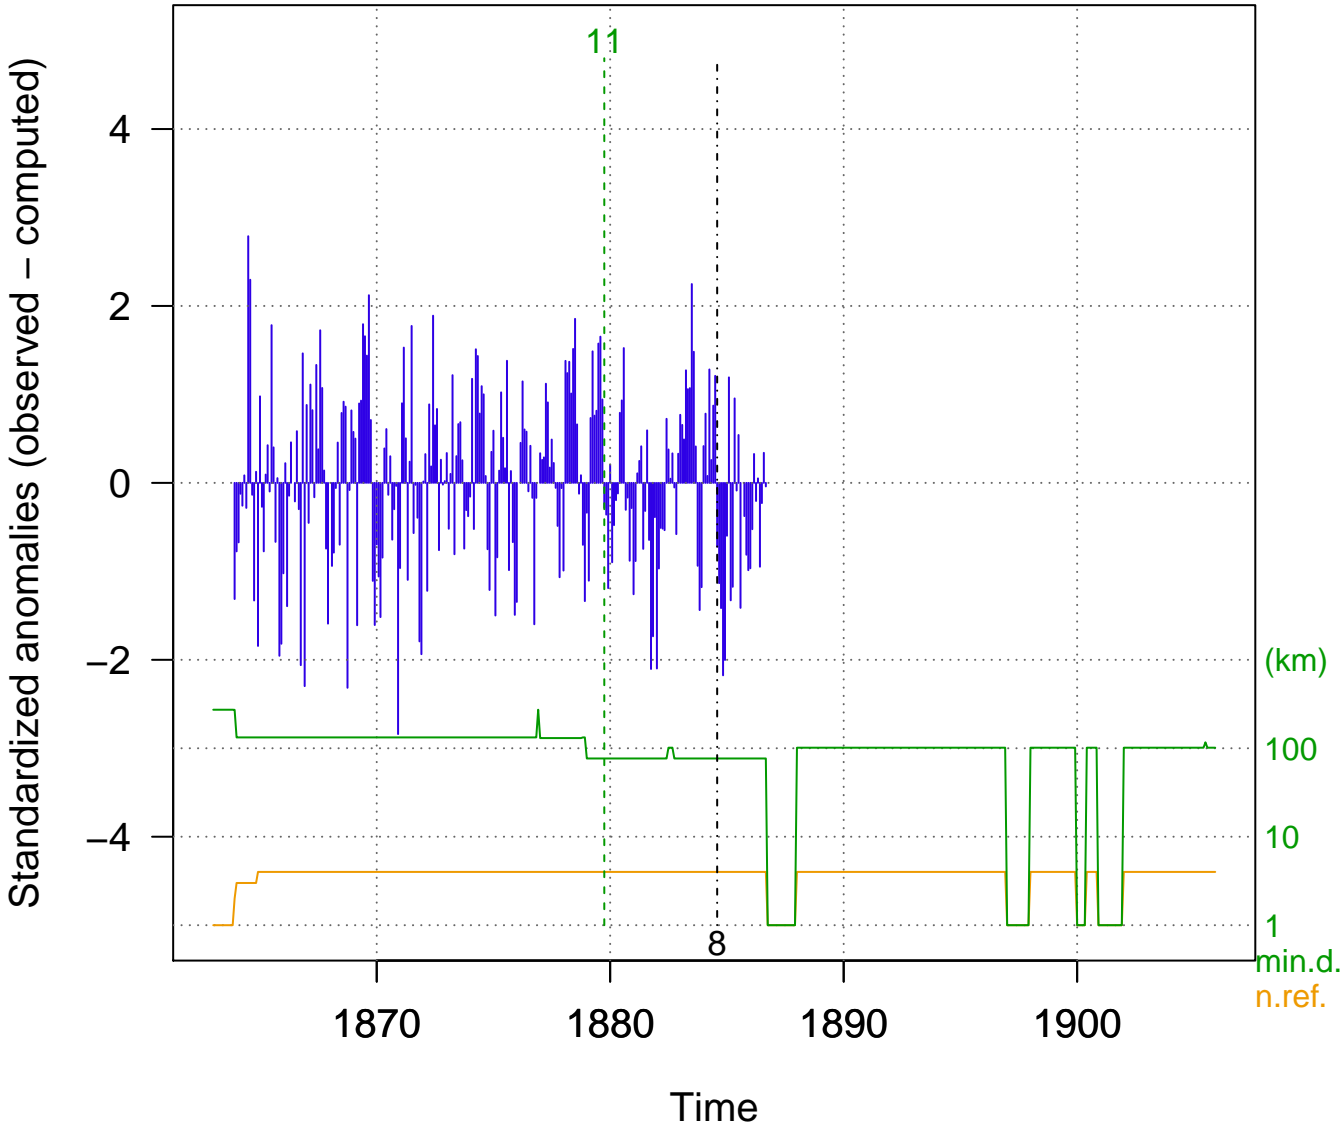

O3 4 (Vizeu)

Vizeu

Standardized anomalies (observed - computed)

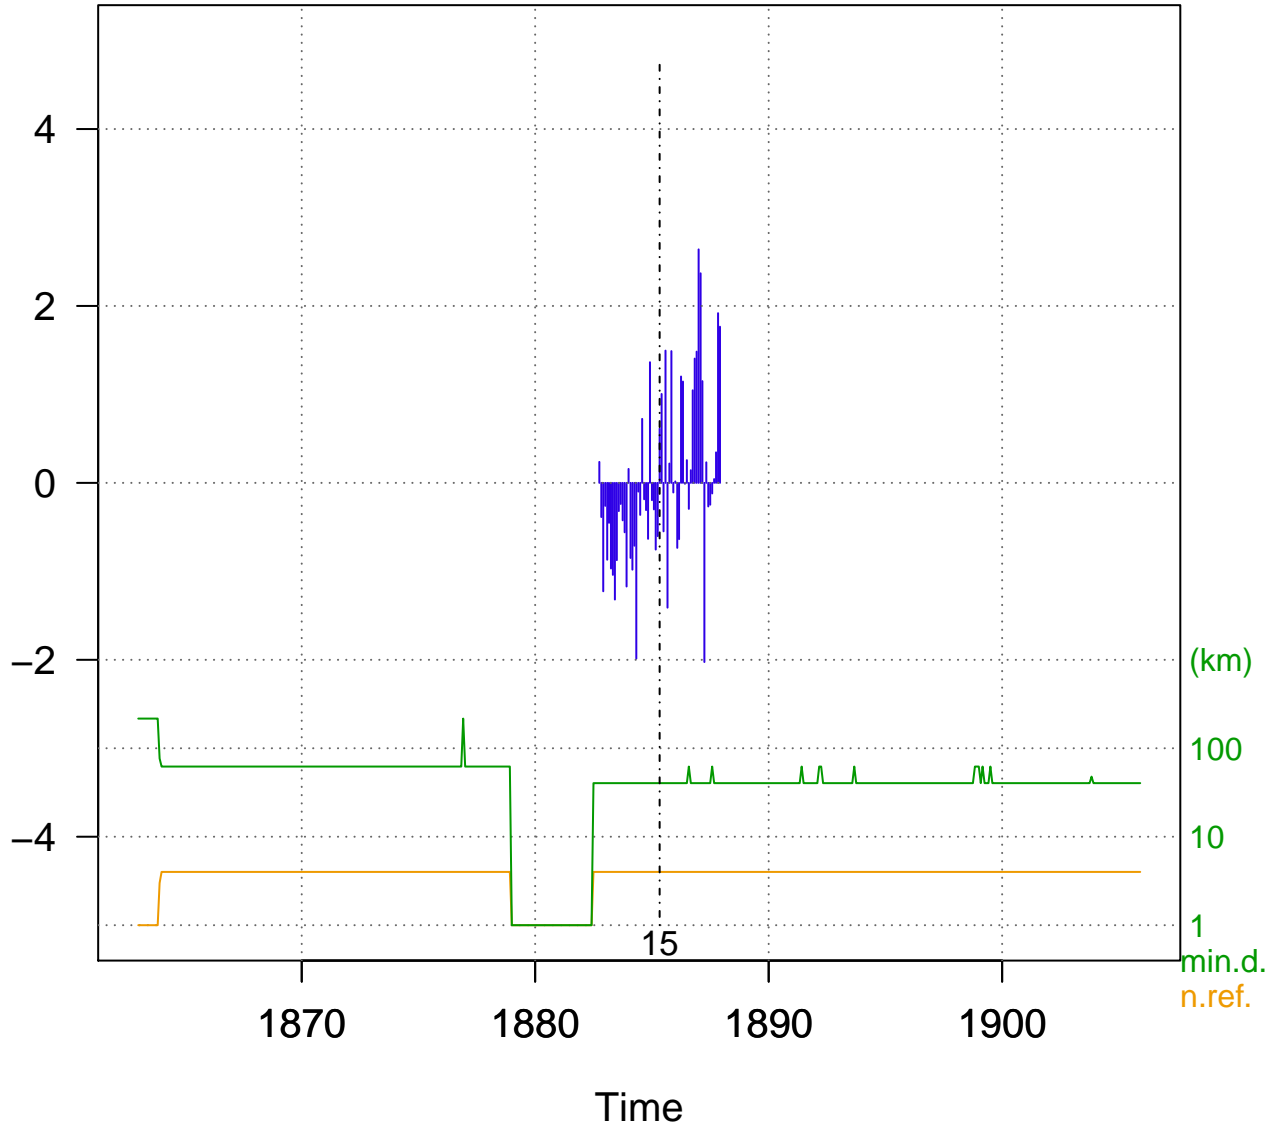

# O3 56 (Vizeu-2) Vizeu-2

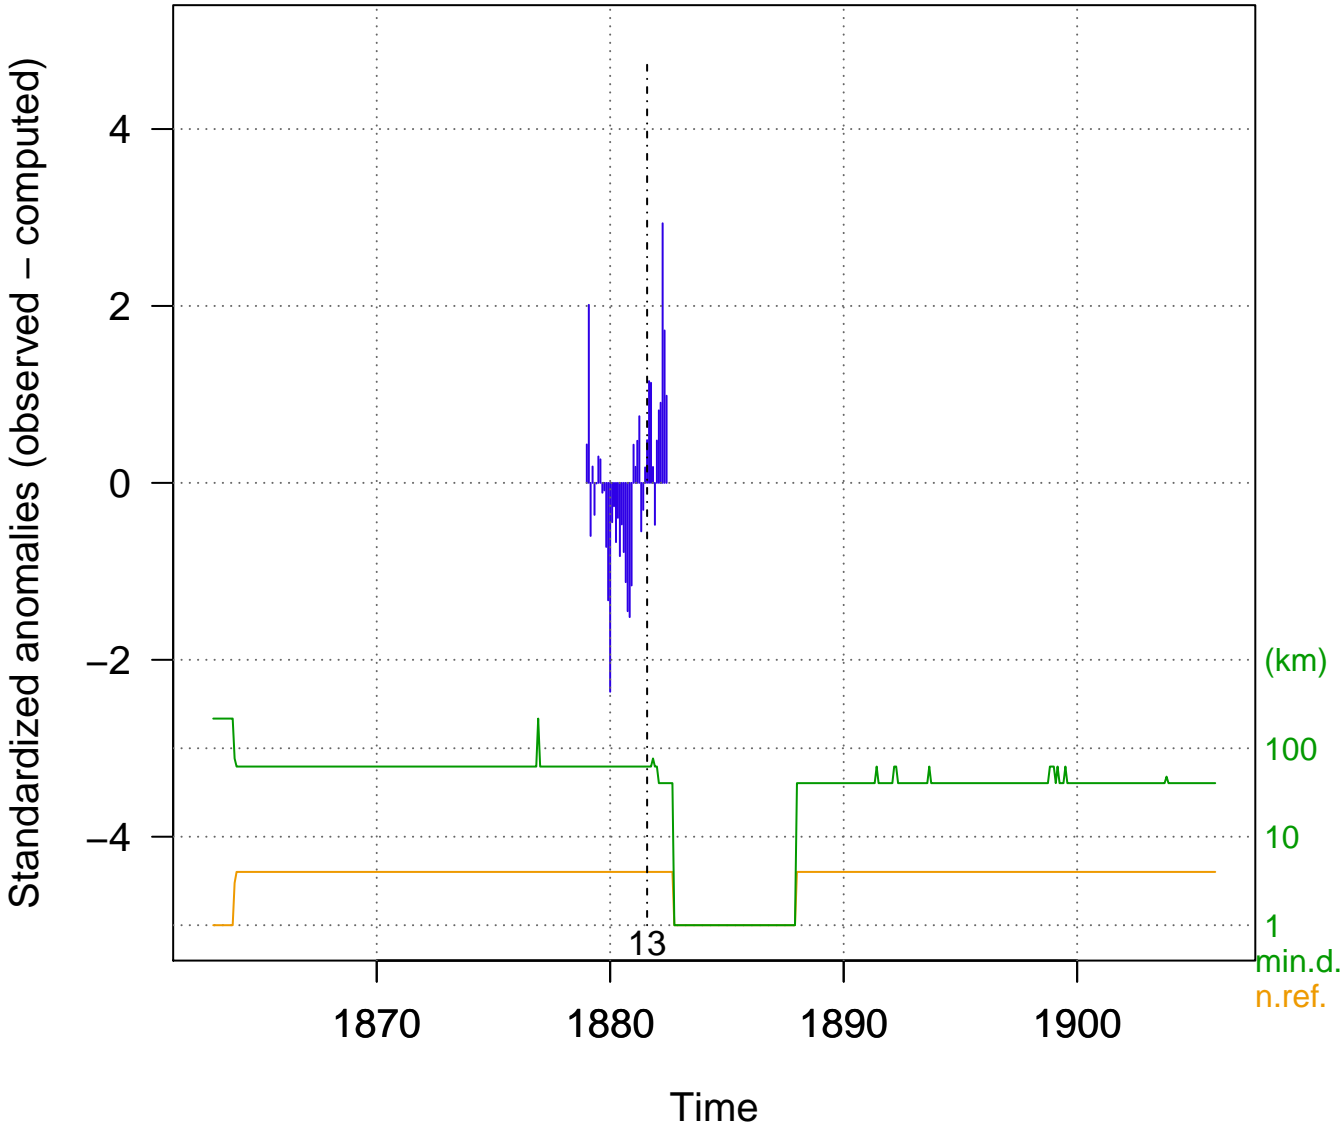

# O3 5 (Guarda) Guarda

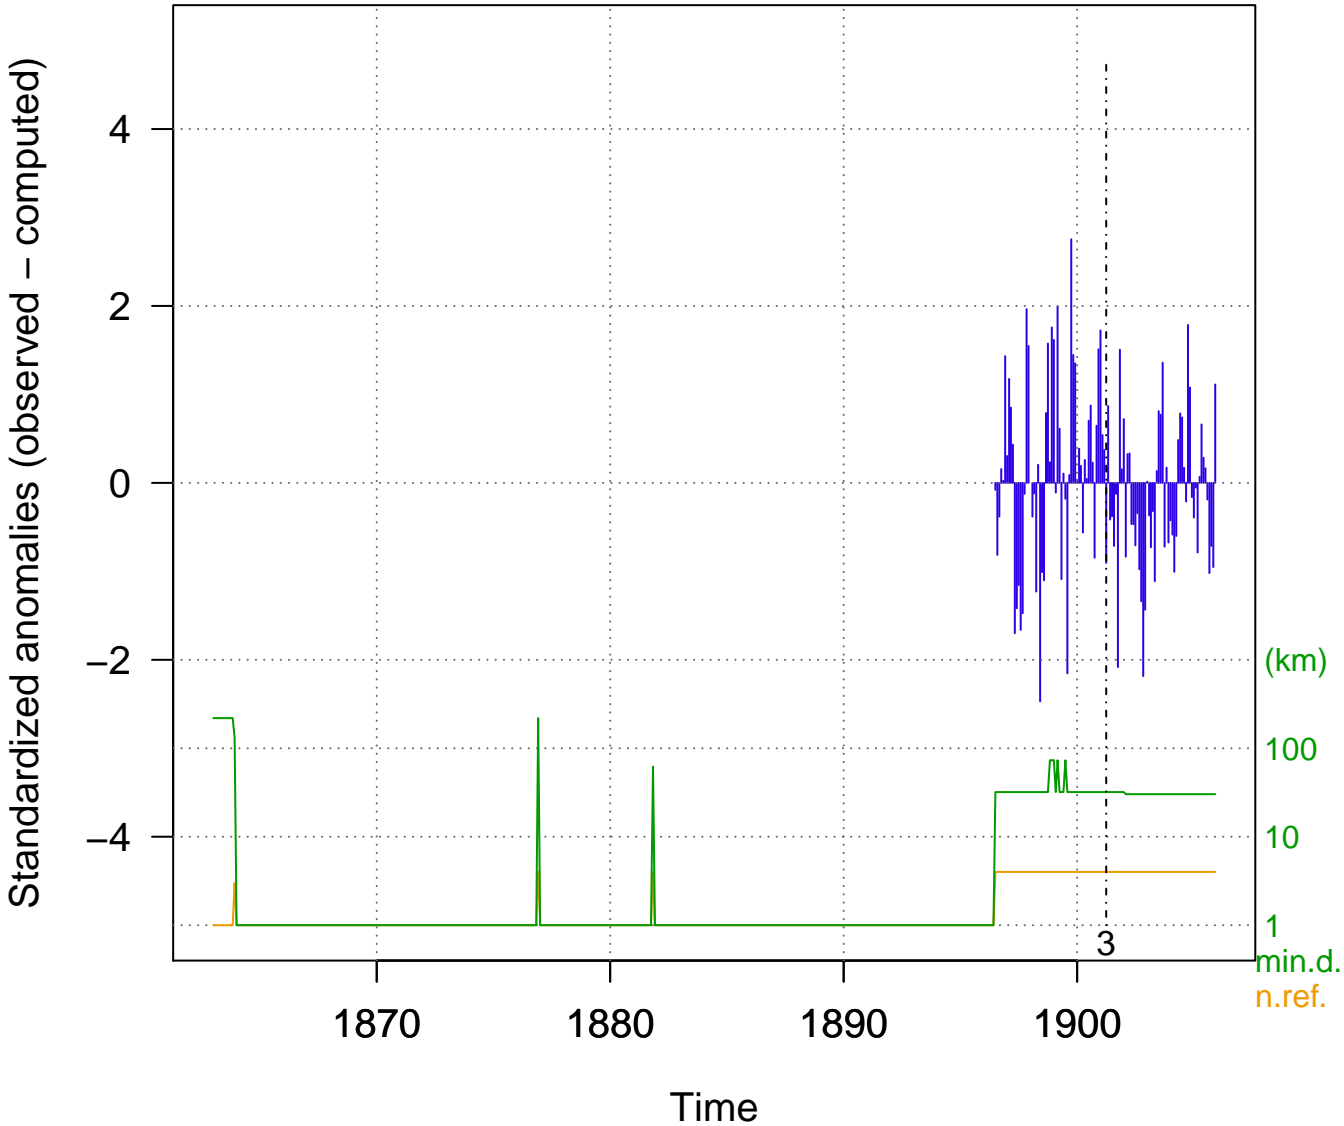

# O3 33 (Guarda-2) Guarda-2

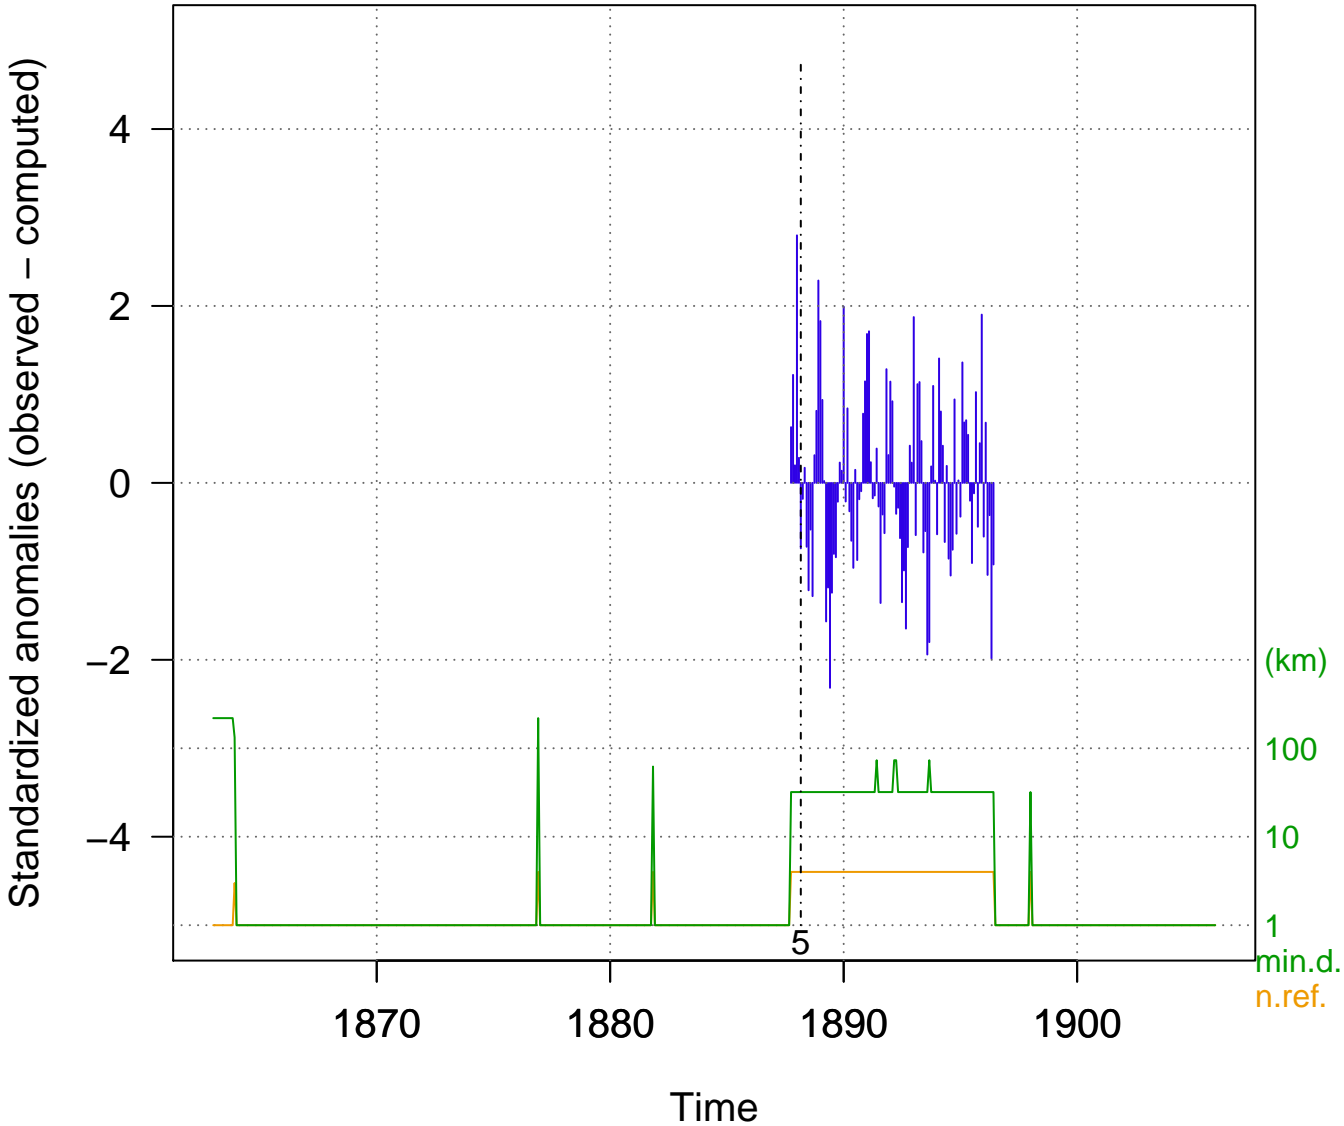

# O3 36 (Guarda-3) Guarda-3

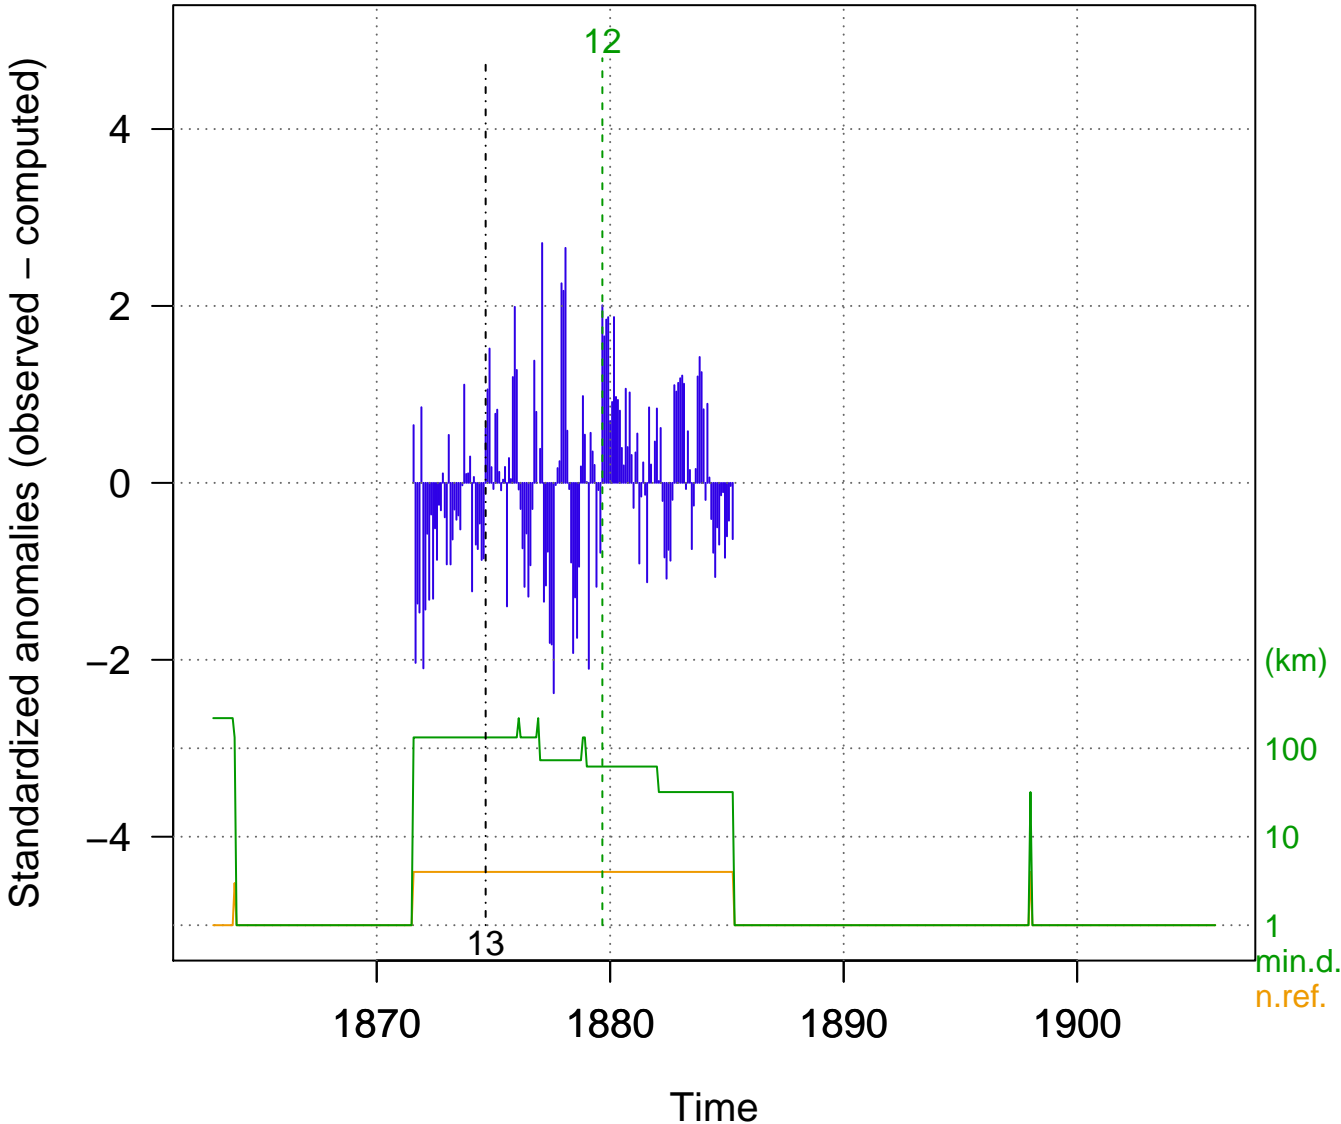

# O3 40 (Guarda-4) Guarda-4

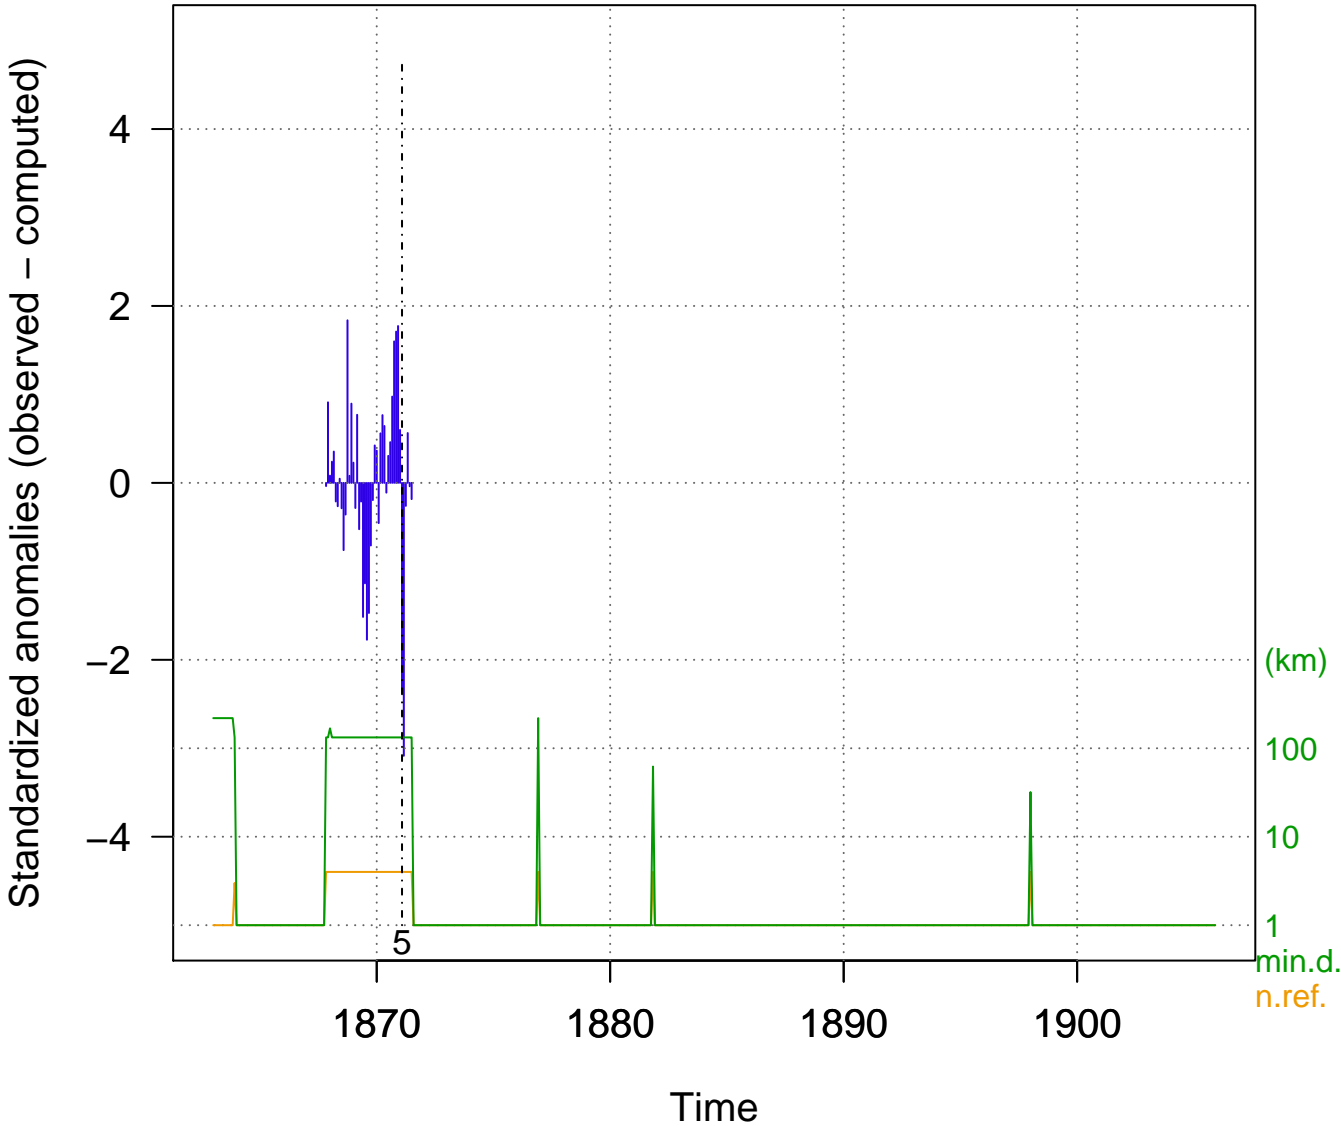

# O3 59 (Guarda-5) Guarda-5

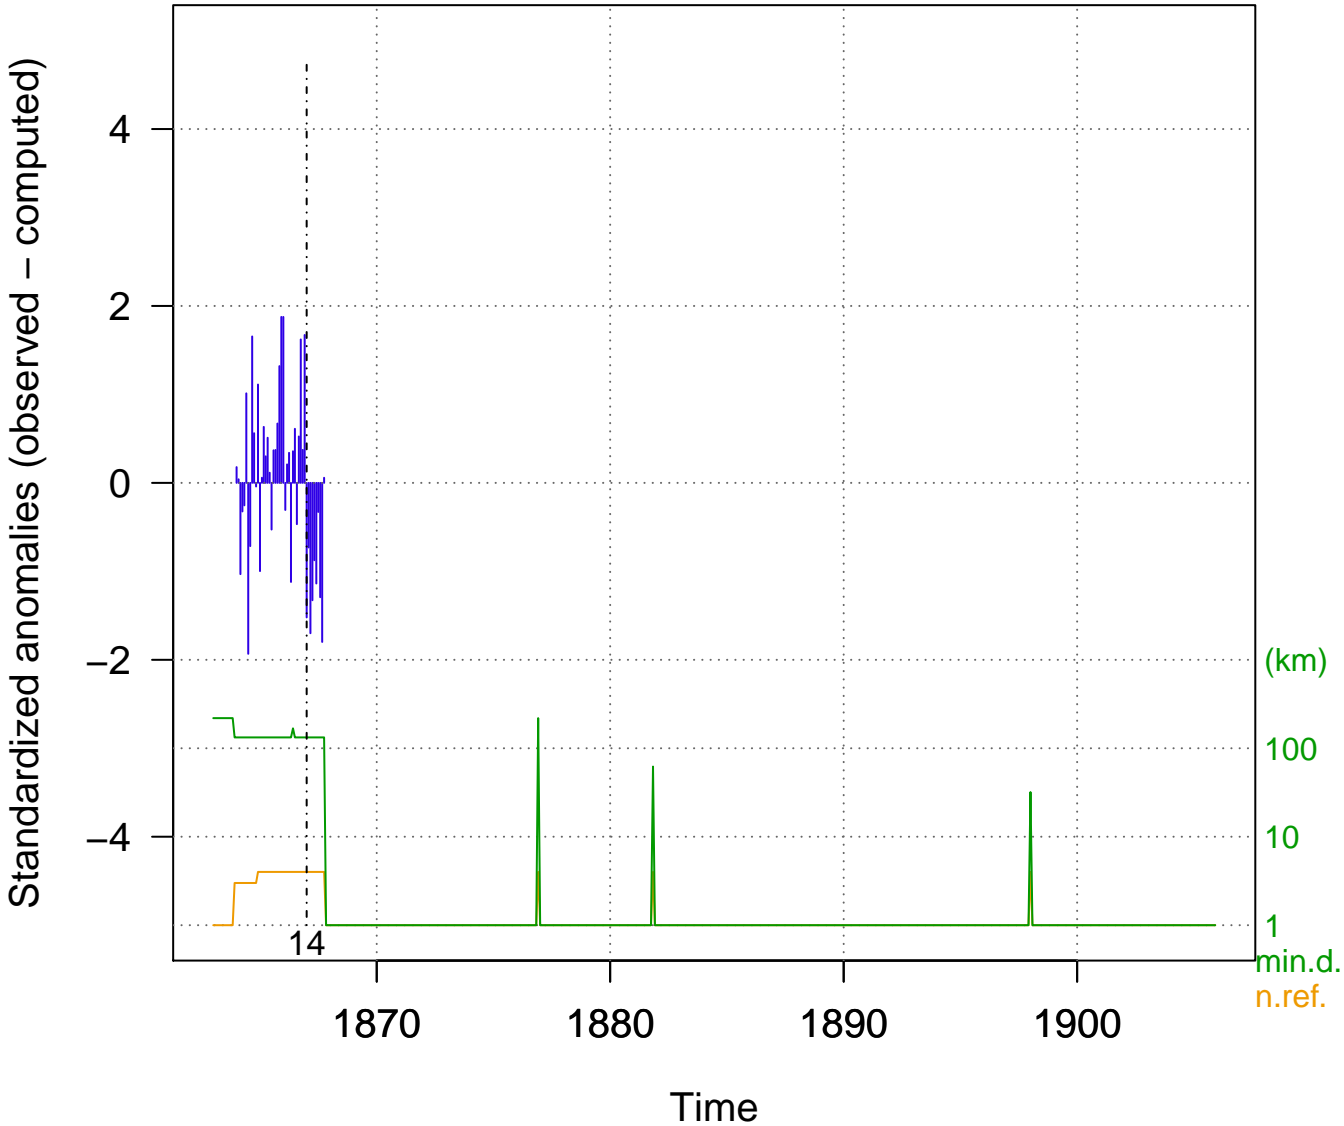



# O3 61 (Guarda-6) Guarda-6

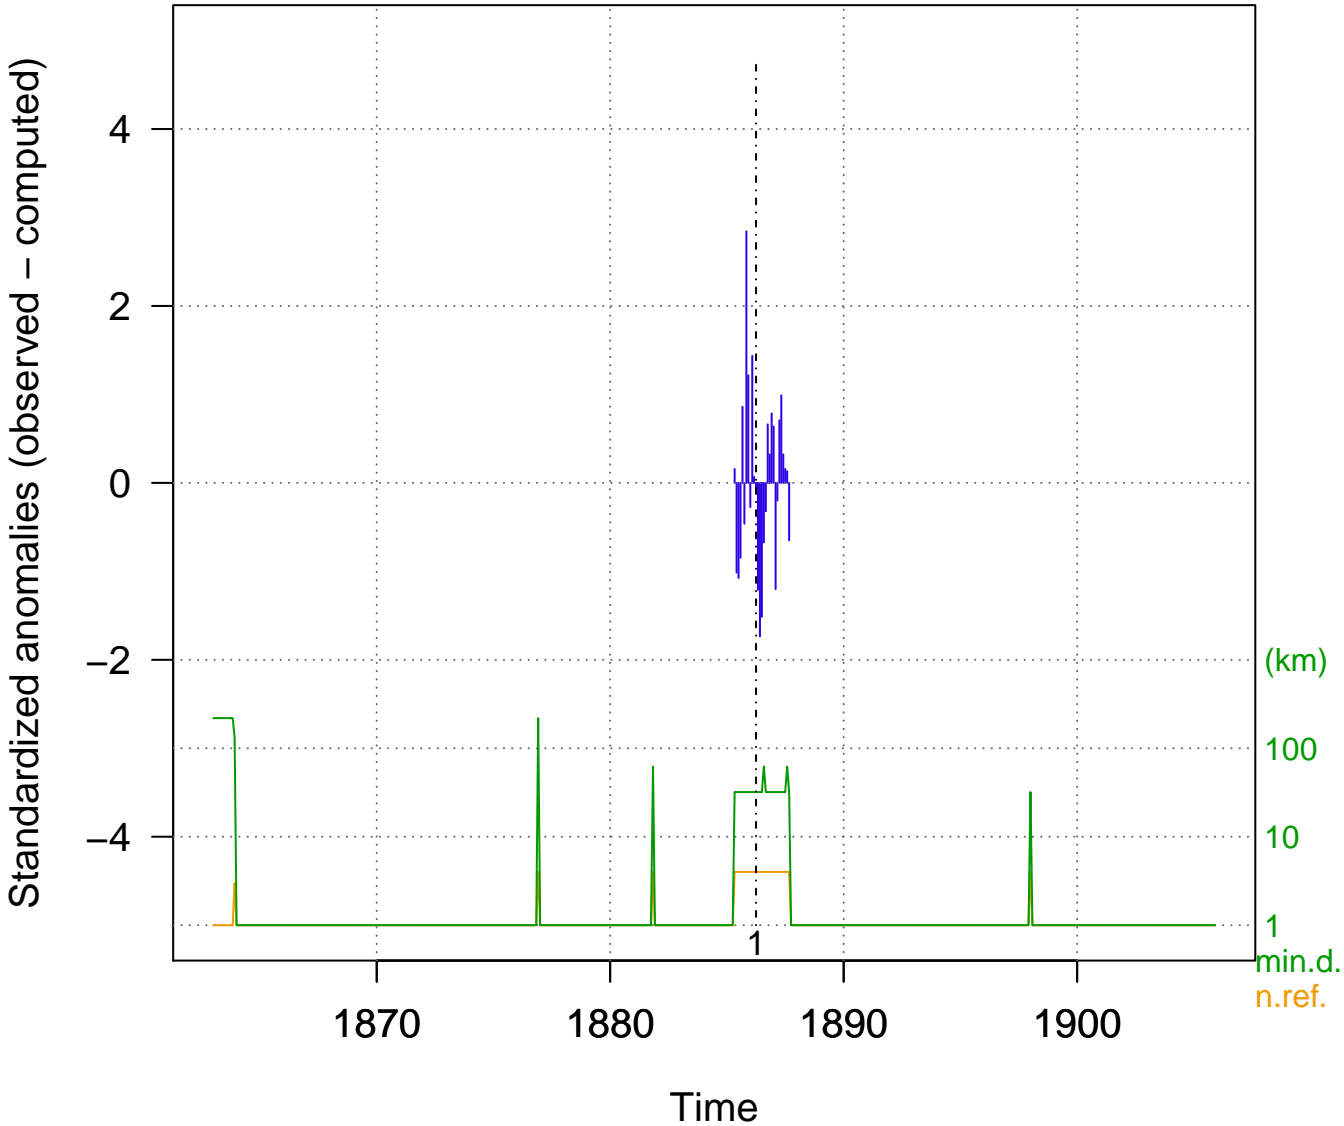

# O3 6 (Serra\_da\_Estrella) Serra da Estrella

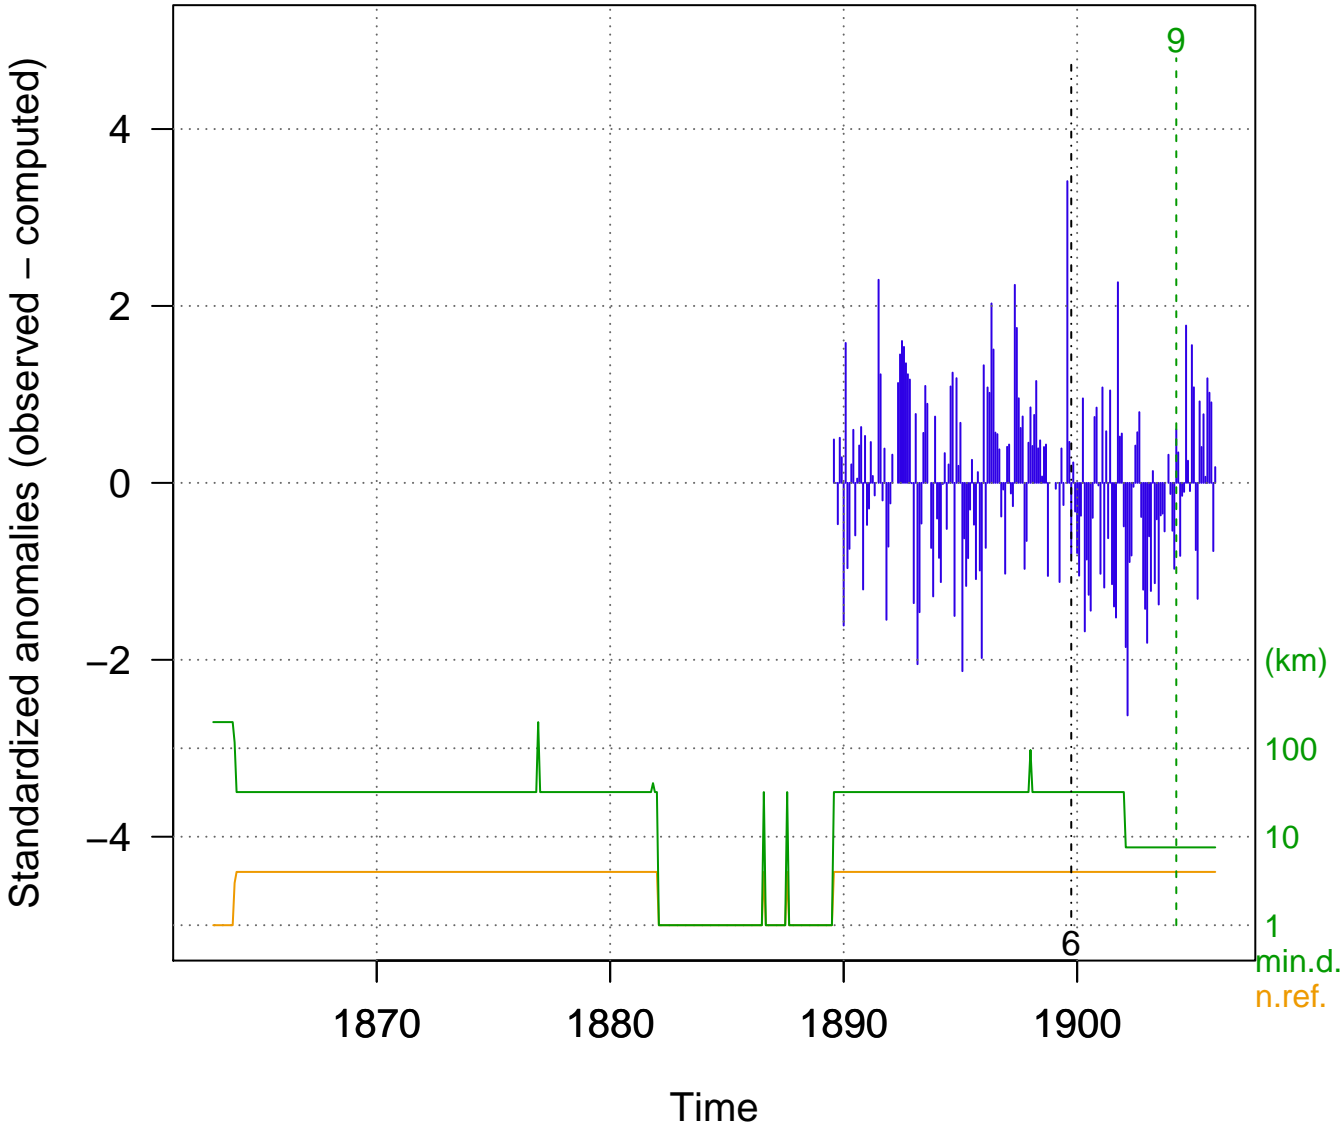

O3 44 (Serra\_da\_Estrella-2)

Serra da Estrella-2

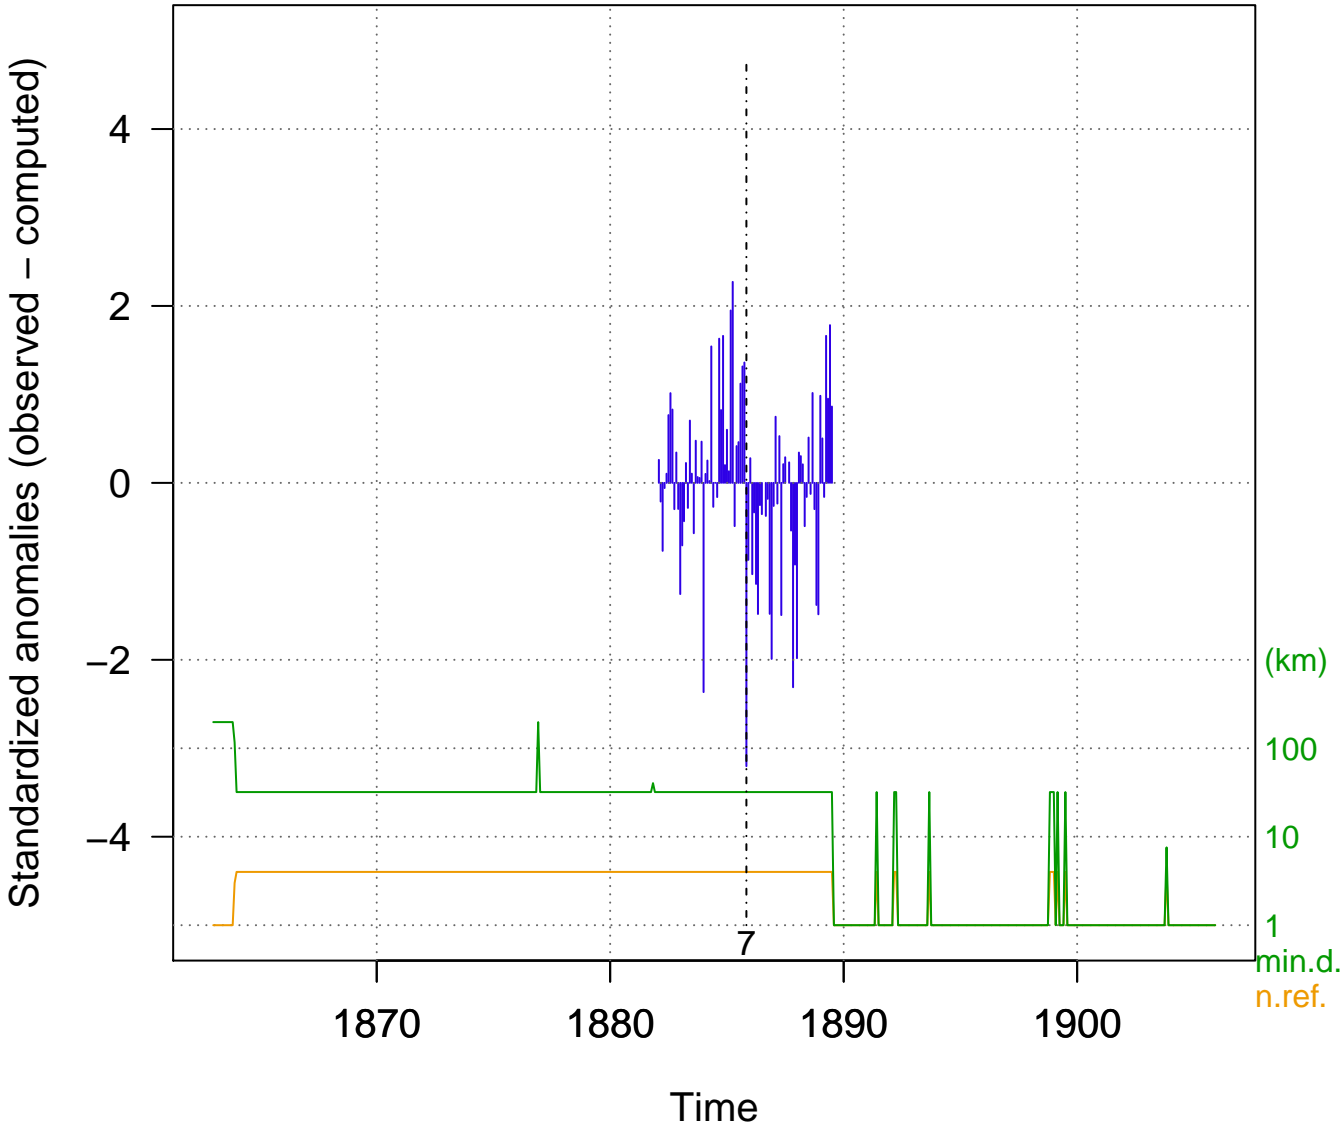

O3 7 (S.\_Fiel)  
S. Fiel

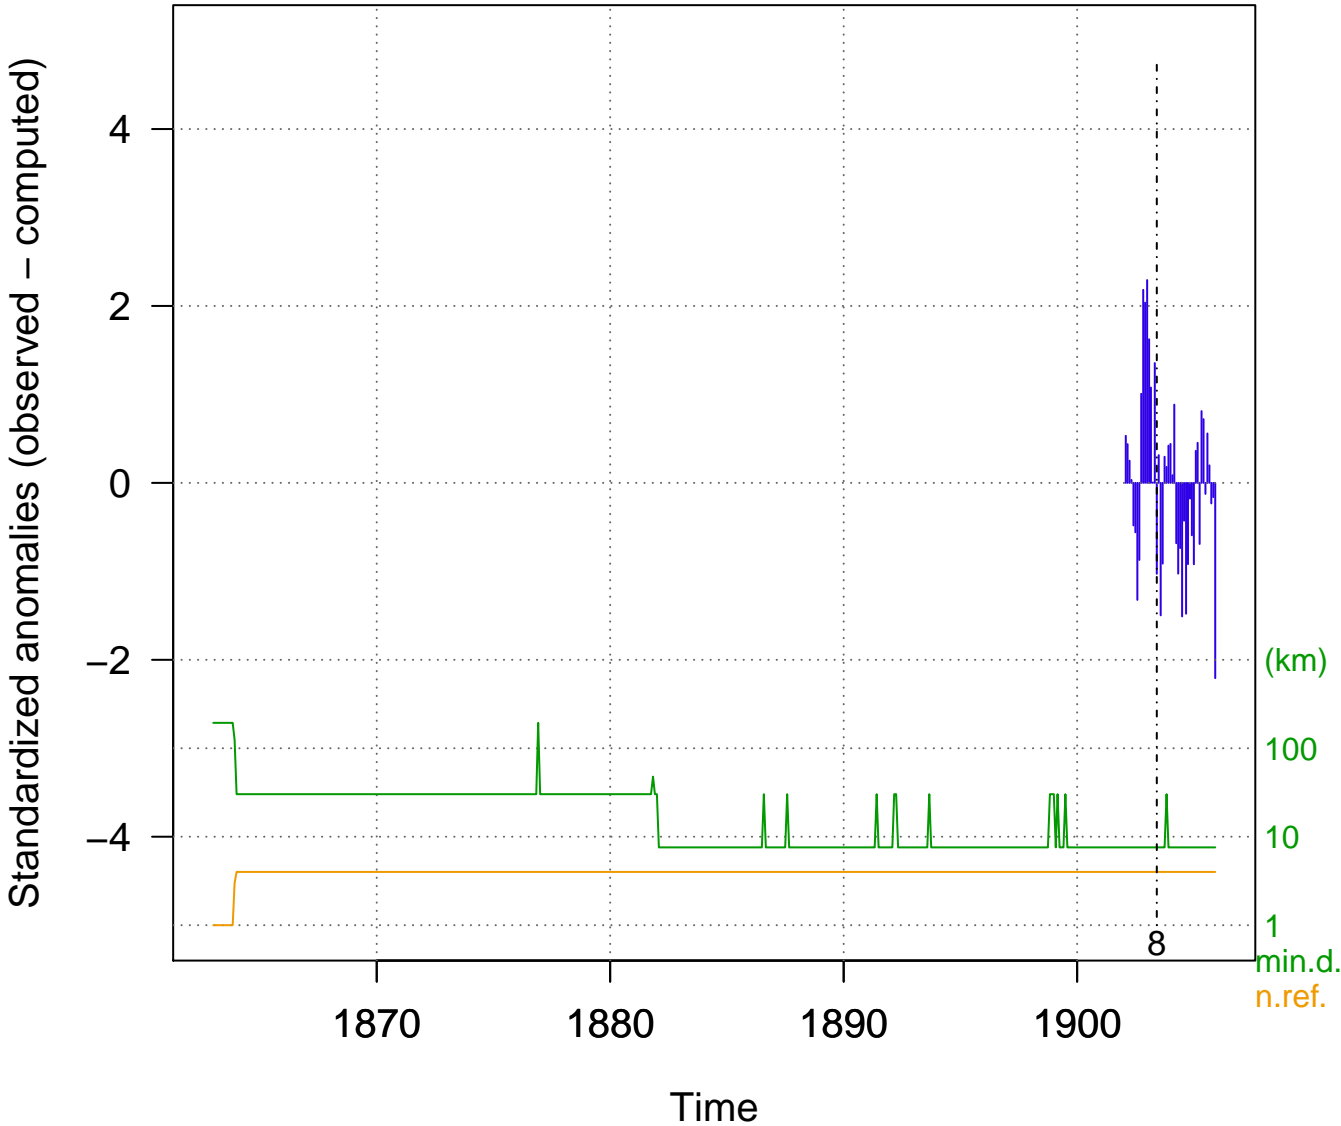

# O3 8 (Alcanhoes) Alcanhoes

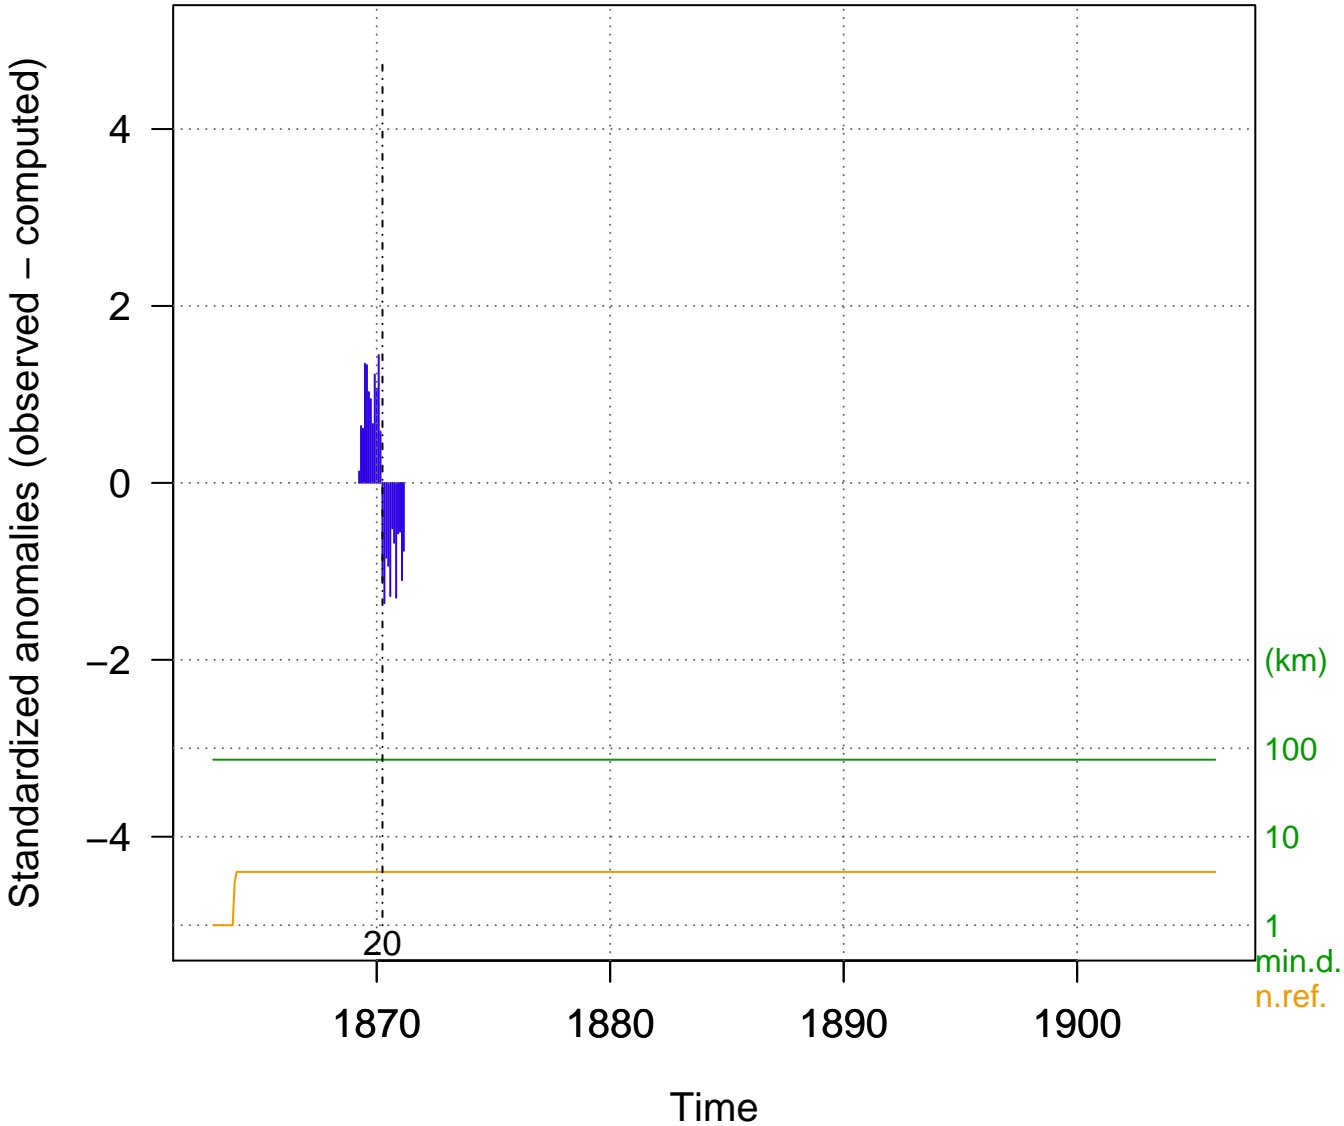

# O3 9 (Campo\_Maior) Campo Maior

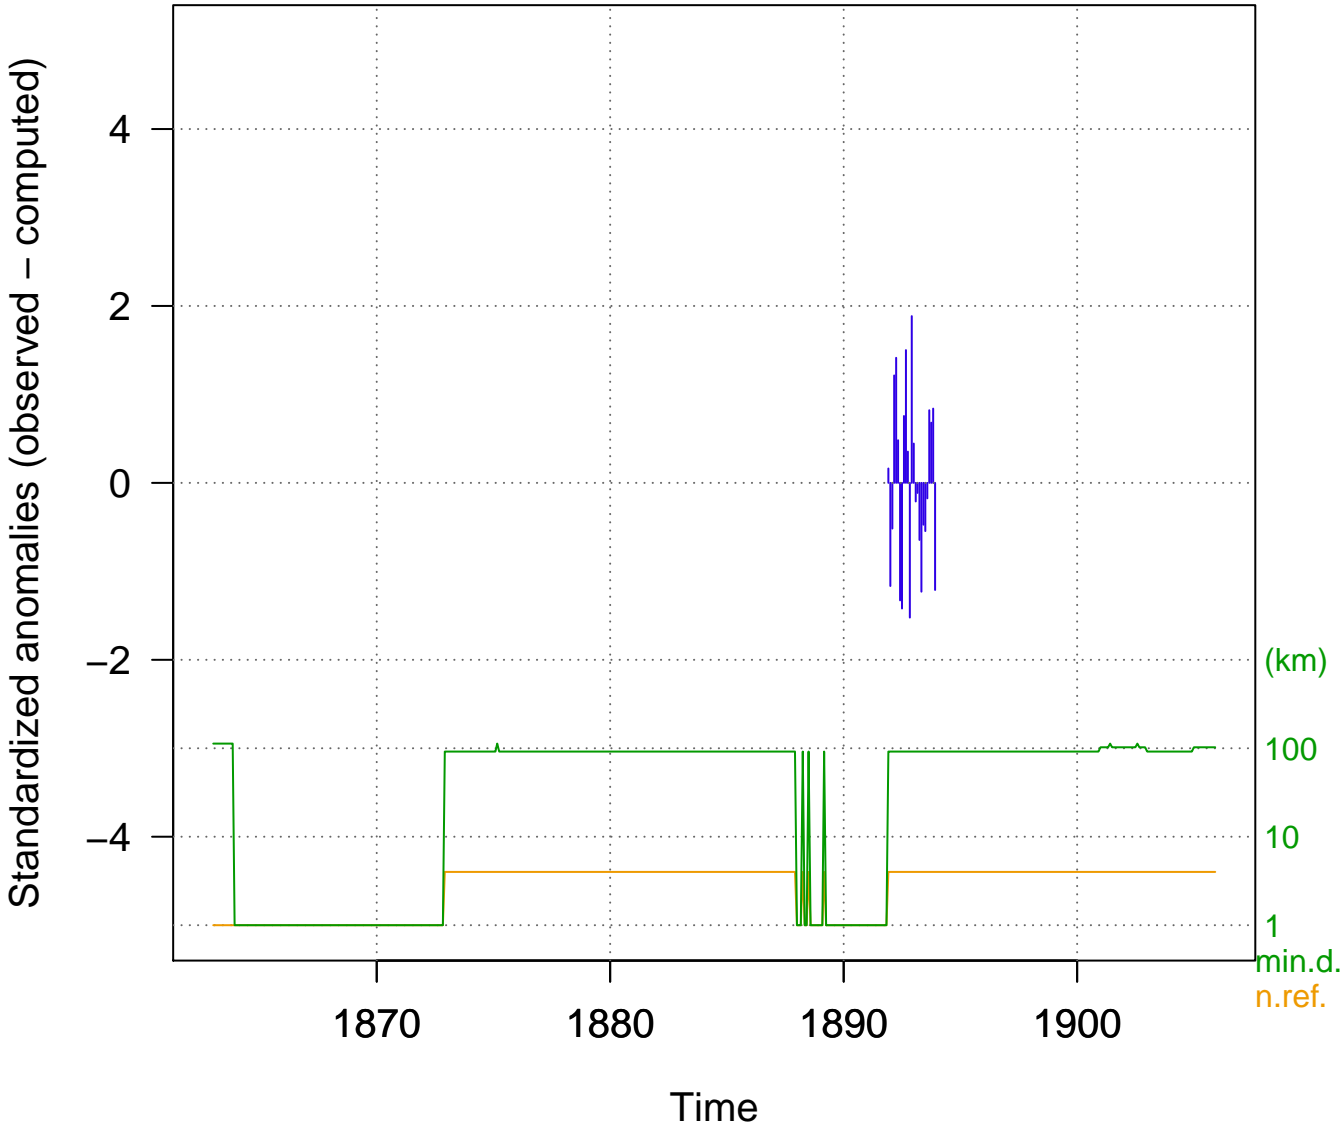

# O3 38 (Campo\_Maior-2) Campo Maior-2

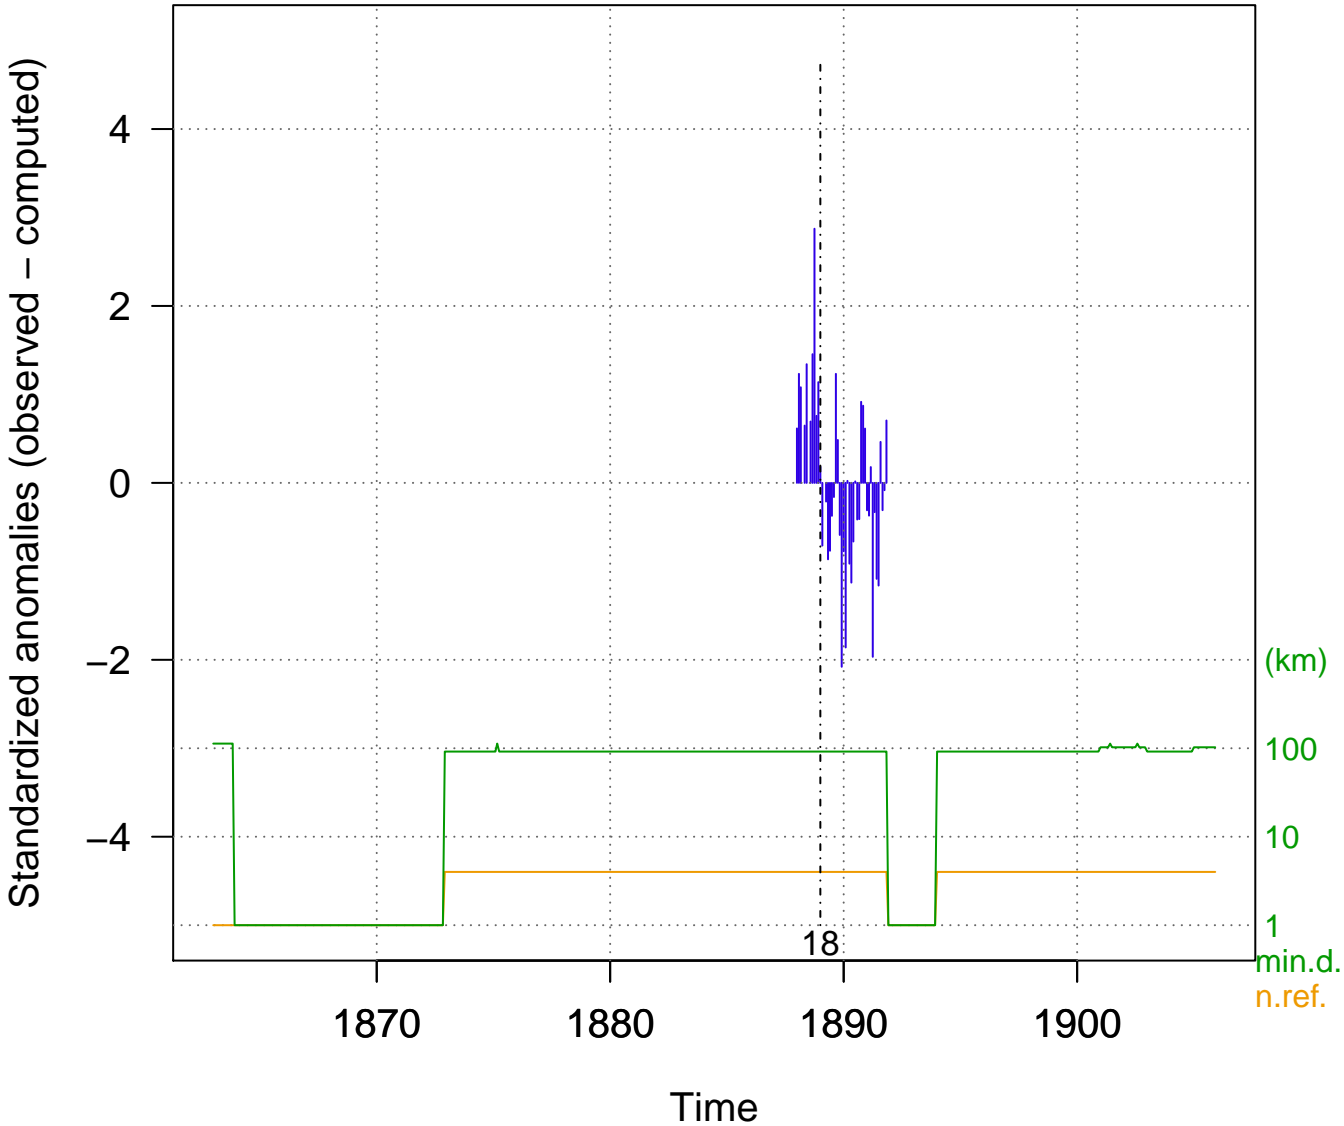

# O3 47 (Campo\_Maior-3) Campo Maior-3

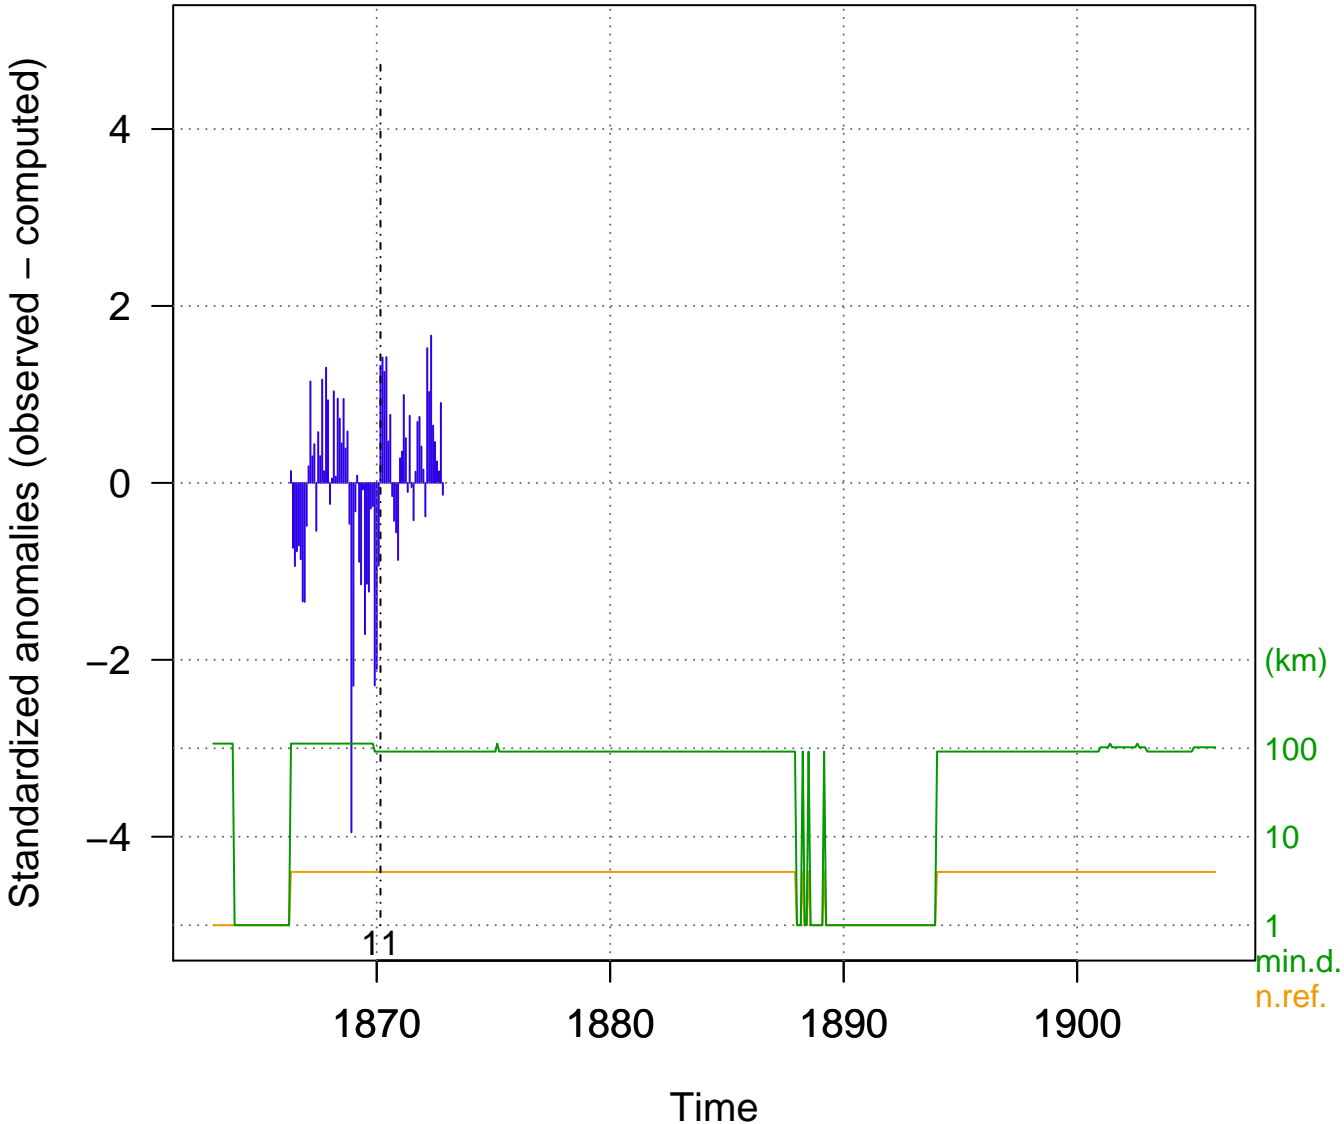



# O3 64 (Campo\_Maior-4) Campo Maior-4

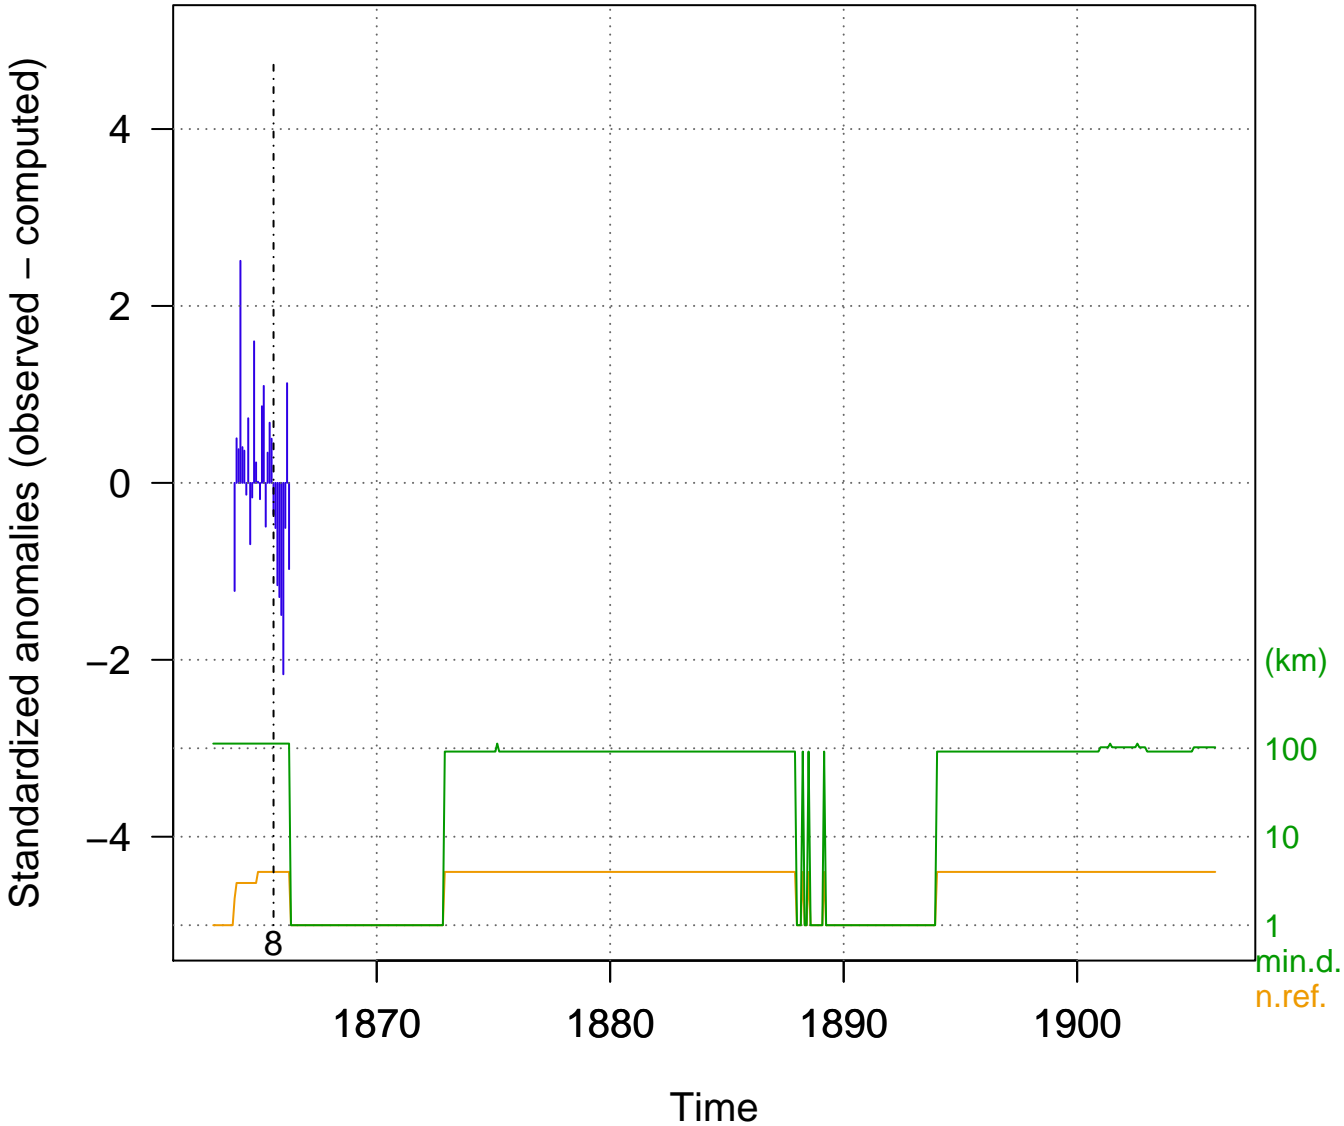

**O3 10 (Infante\_D\_Luiz)**  
**Lisbon Infante D. Luiz**

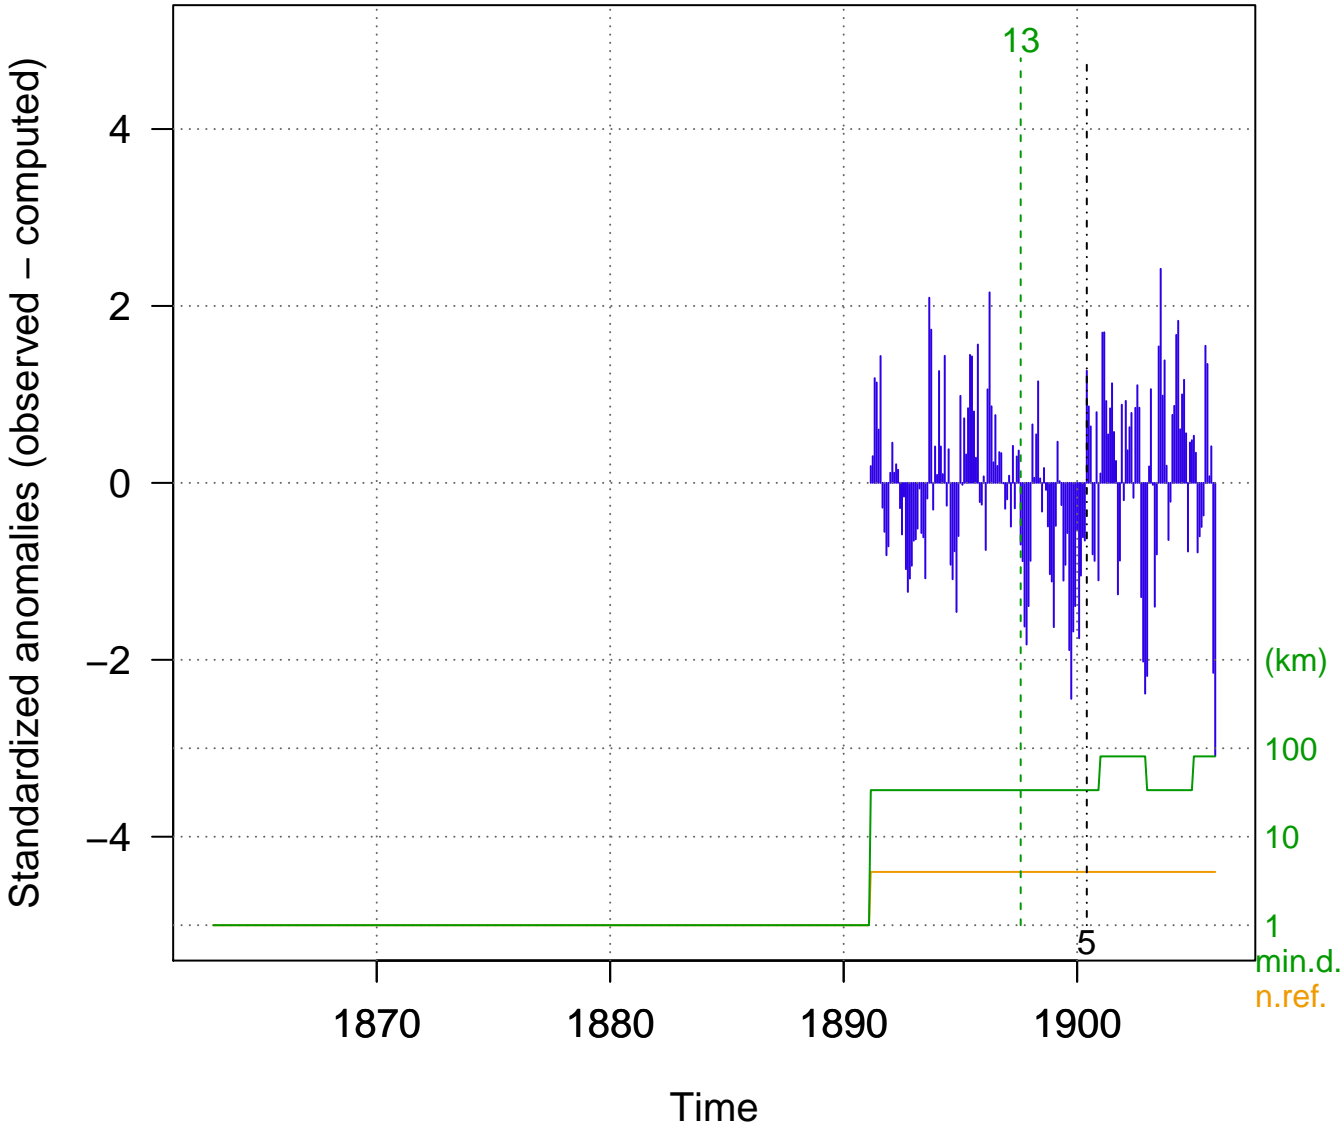

O3 26 (Infante\_D\_Luiz-2)

Lisbon Infante D. Luiz-2

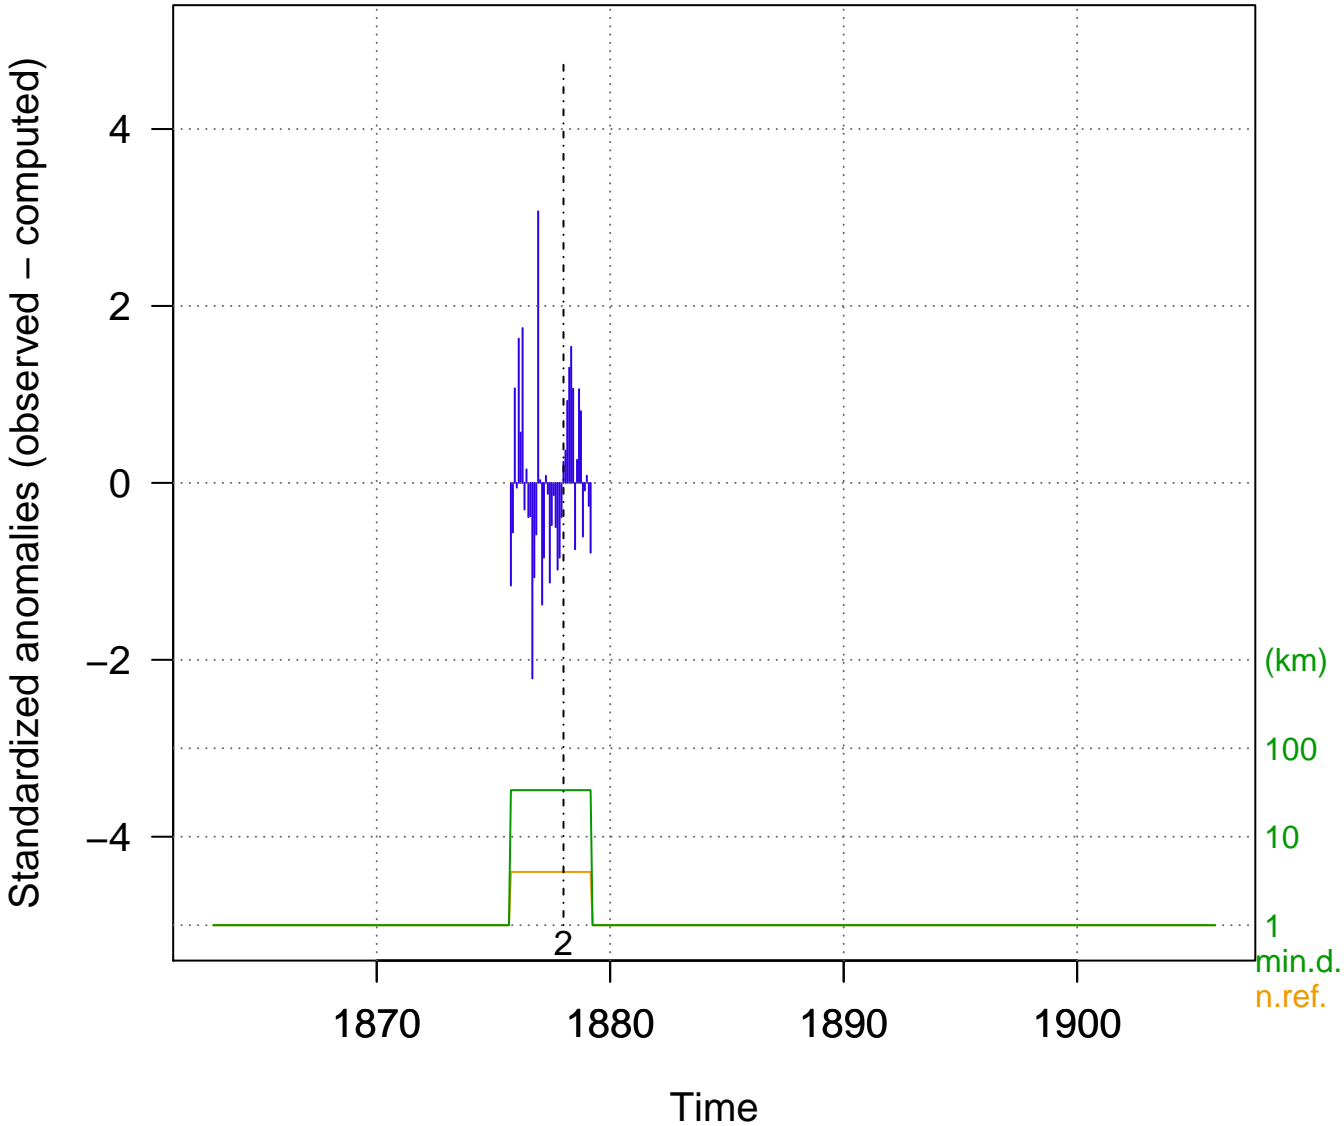

O3 34 (Infante\_D\_Luiz-3)

Lisbon Infante D. Luiz-3

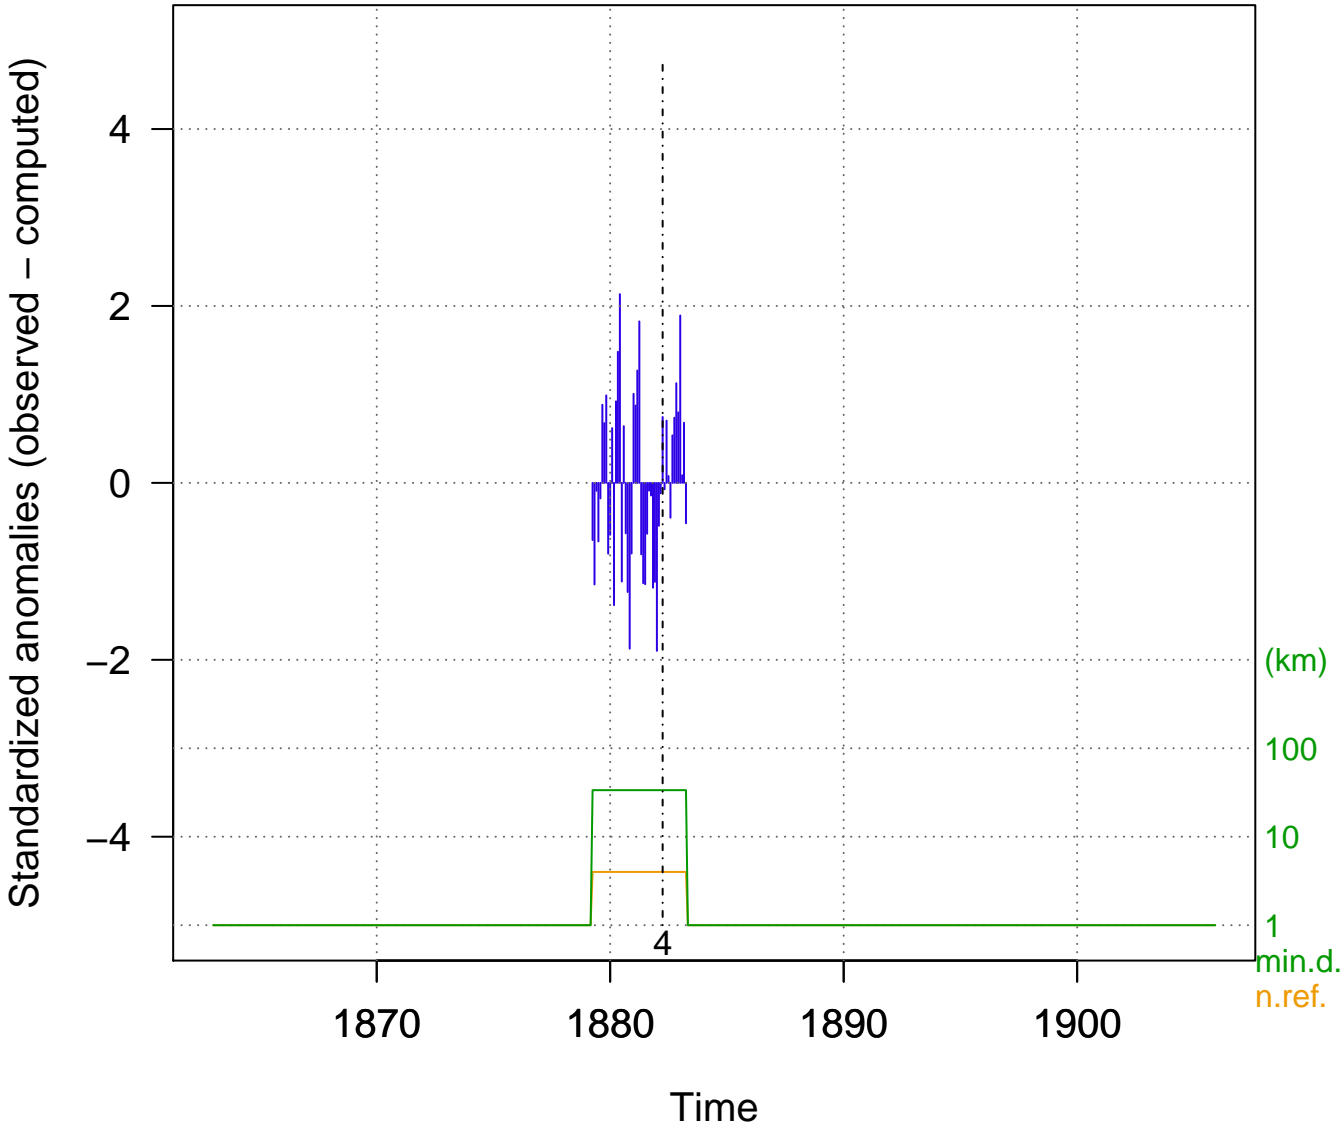

O3 49 (Infante\_D\_Luiz-4)

Lisbon Infante D. Luiz-4

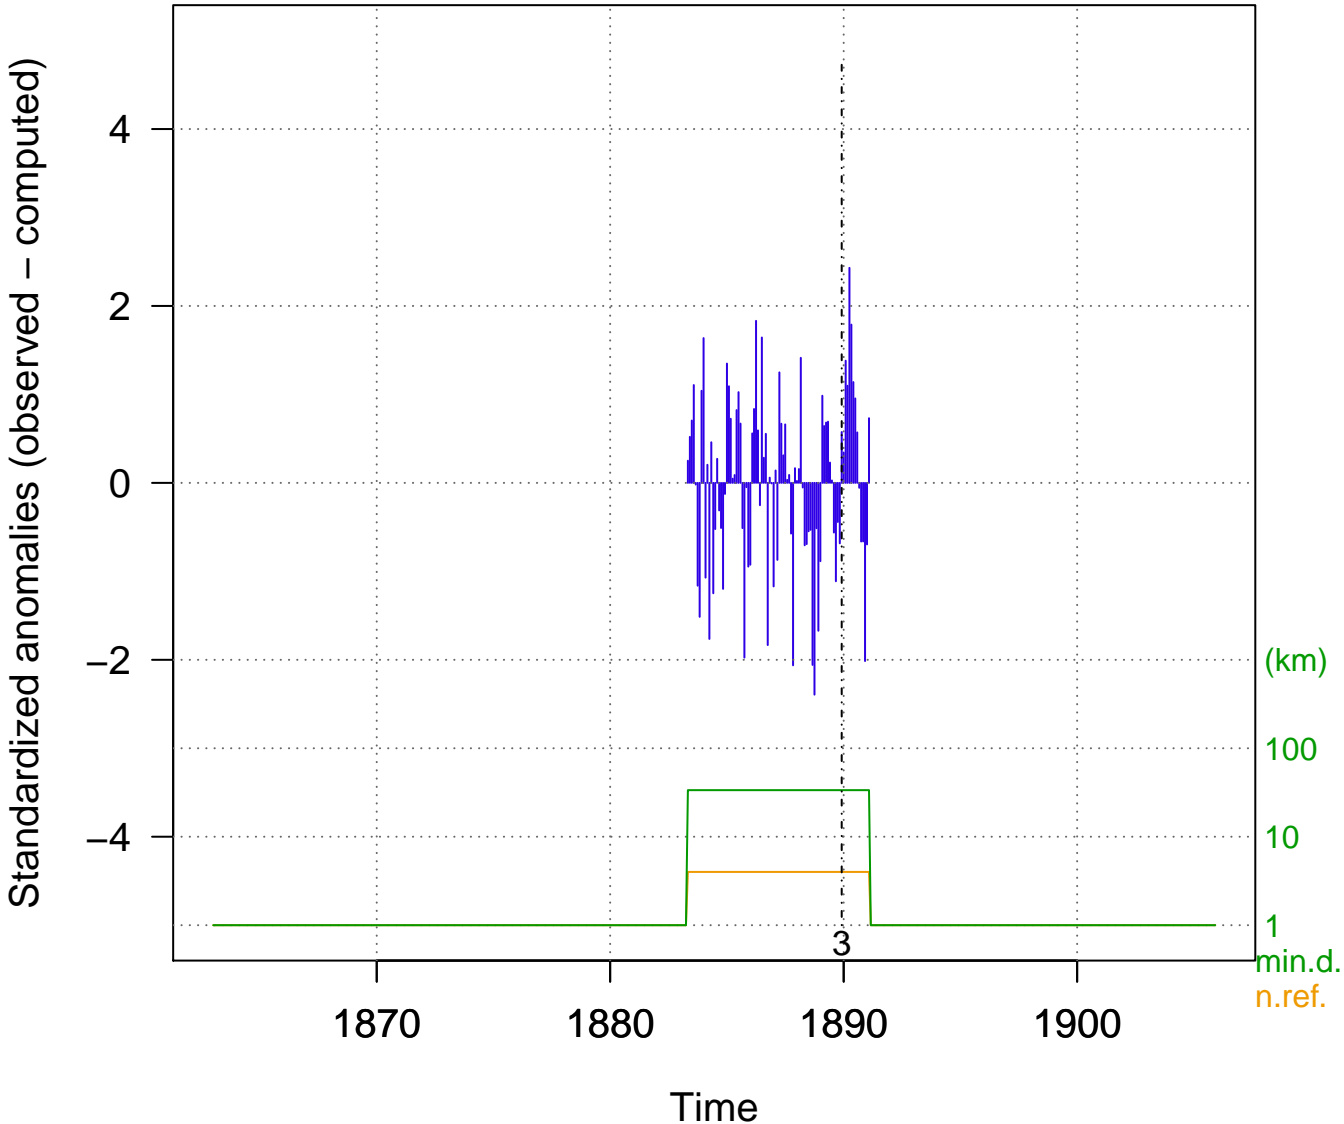

# O3 50 (Infante\_D\_Luiz-5)

Lisbon Infante D. Luiz-5

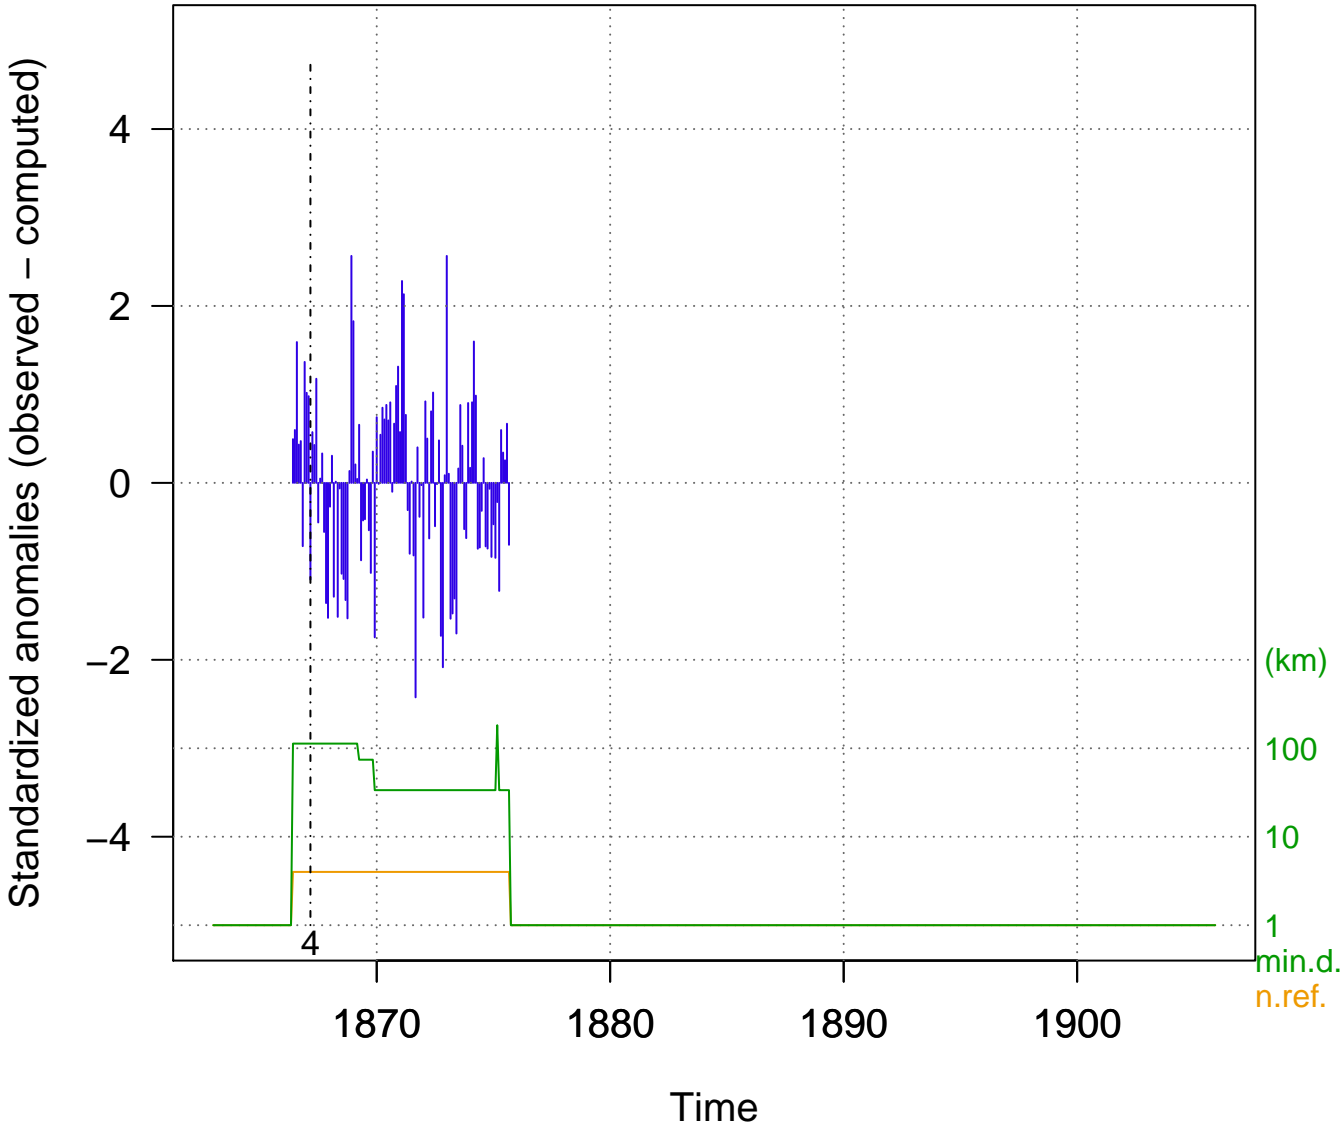

# O3 60 (Infante\_D\_Luiz-6)

Lisbon Infante D. Luiz-6

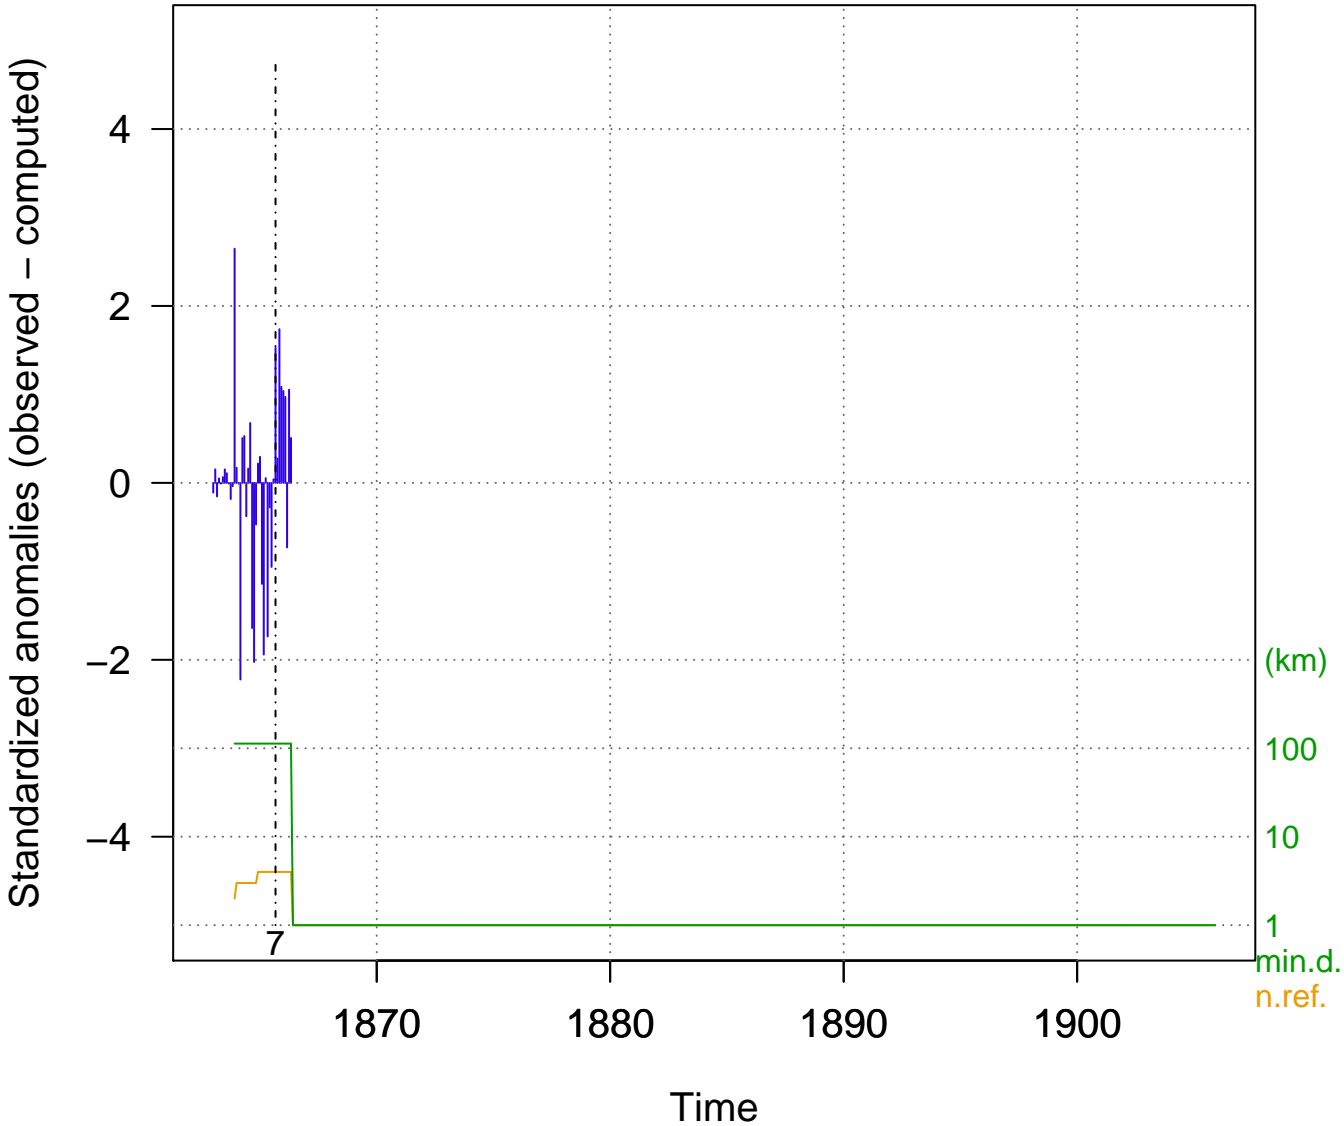

# O3 11 (Angra\_do\_Heroismo)

## Angra do Heroismo

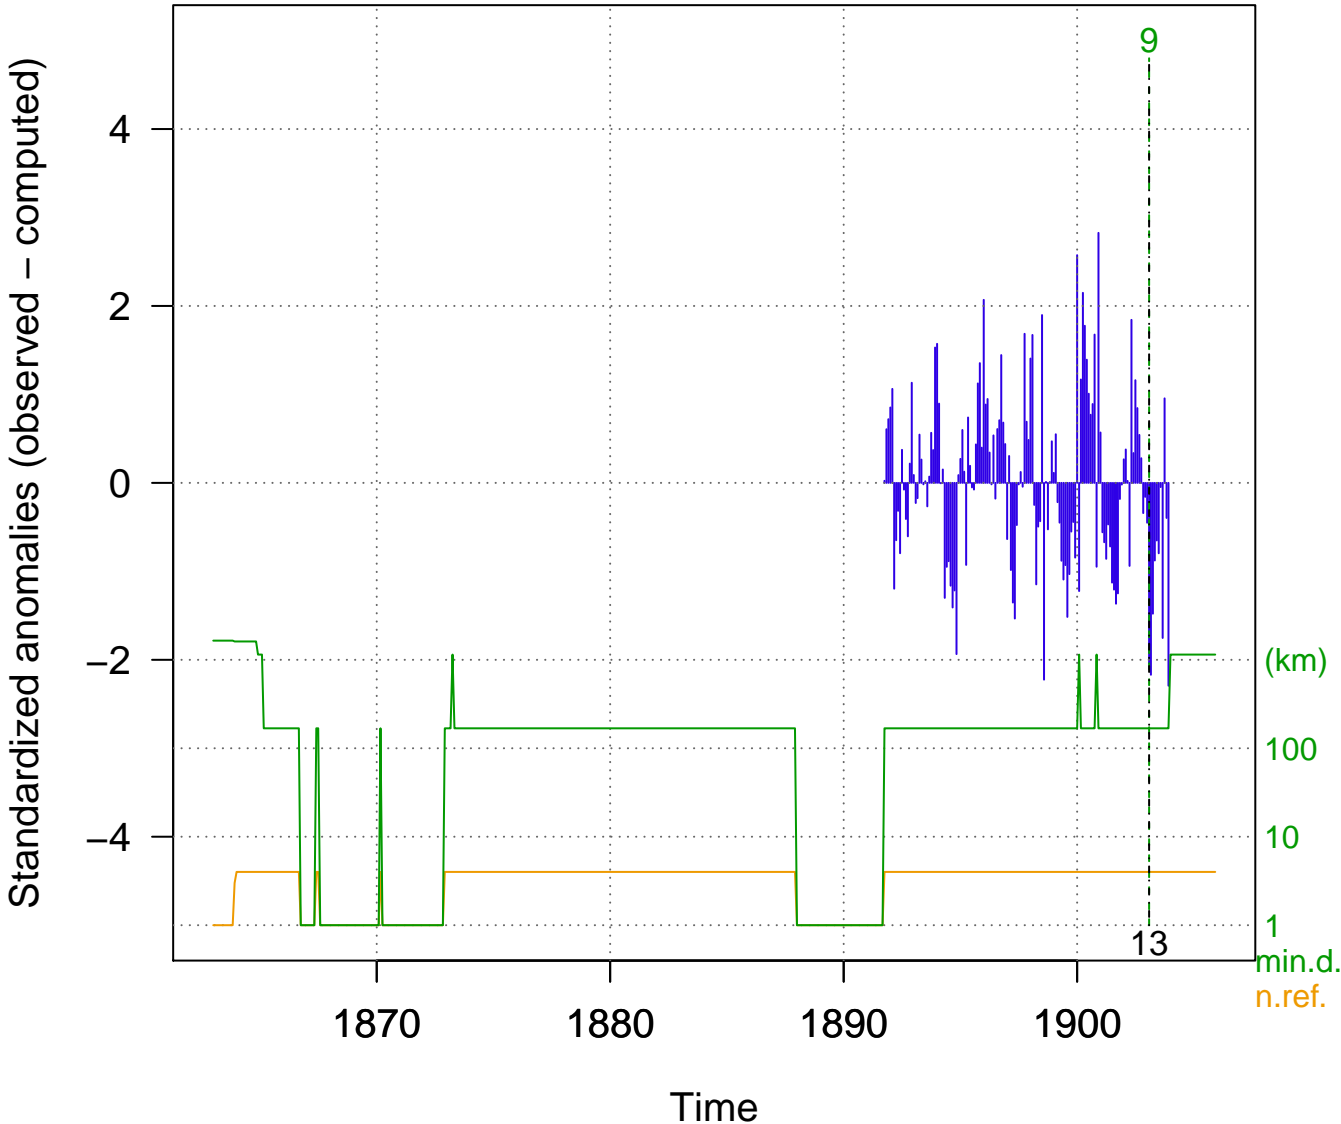



# O3 51 (Angra\_do\_Heroismo-2)

## Angra do Heroismo-2

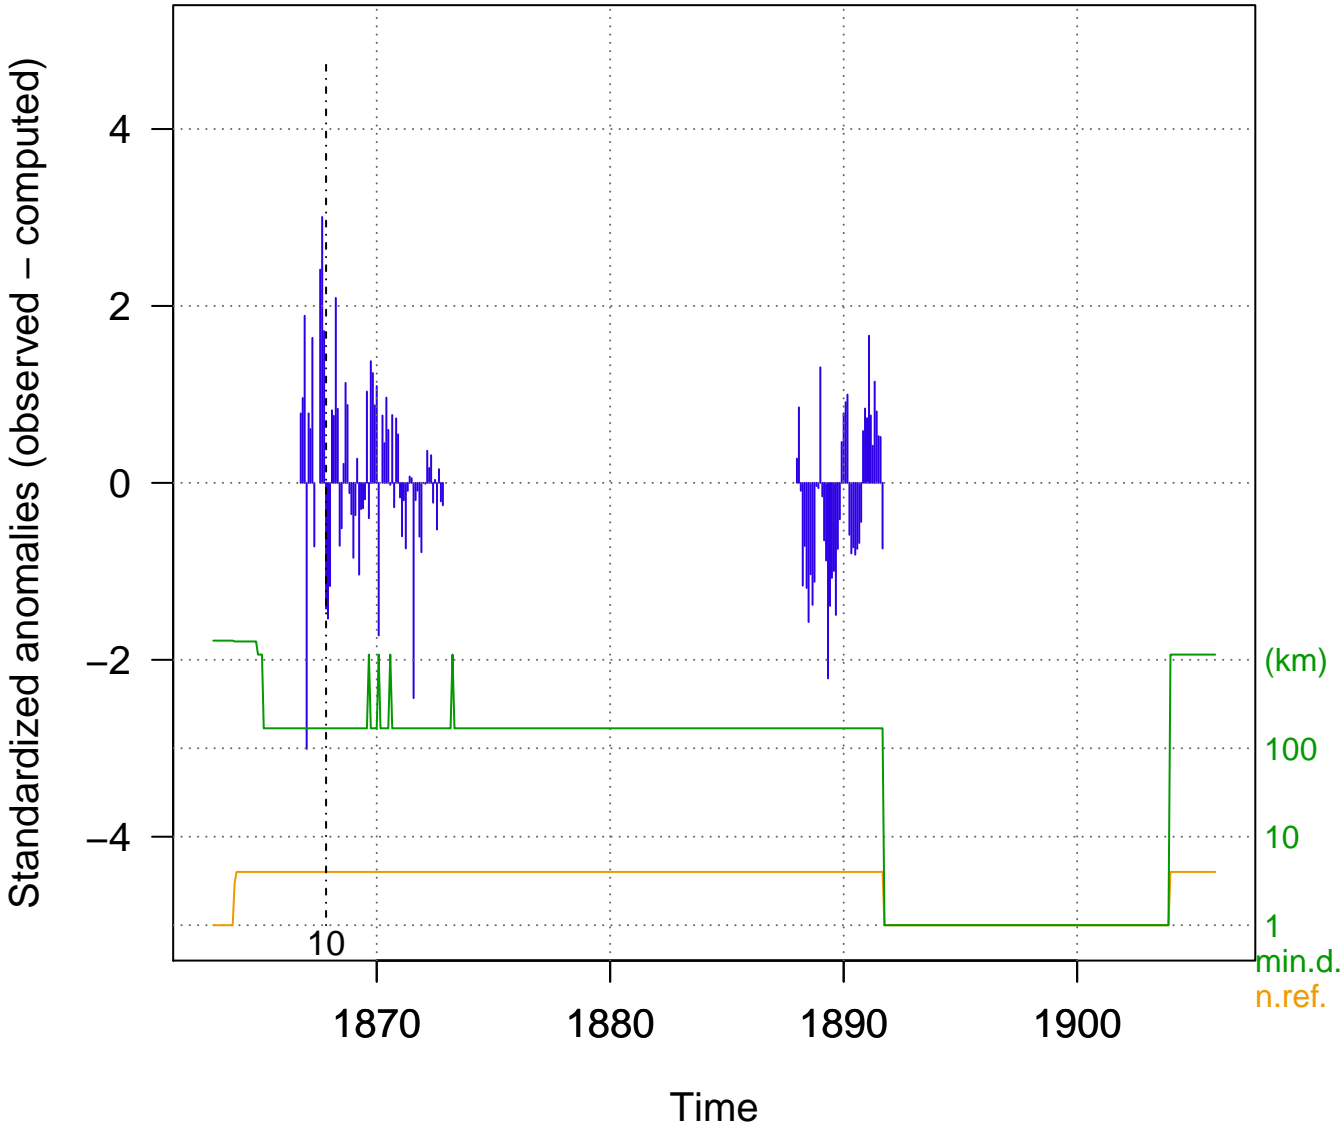

# O3 12 (Evora) Evora

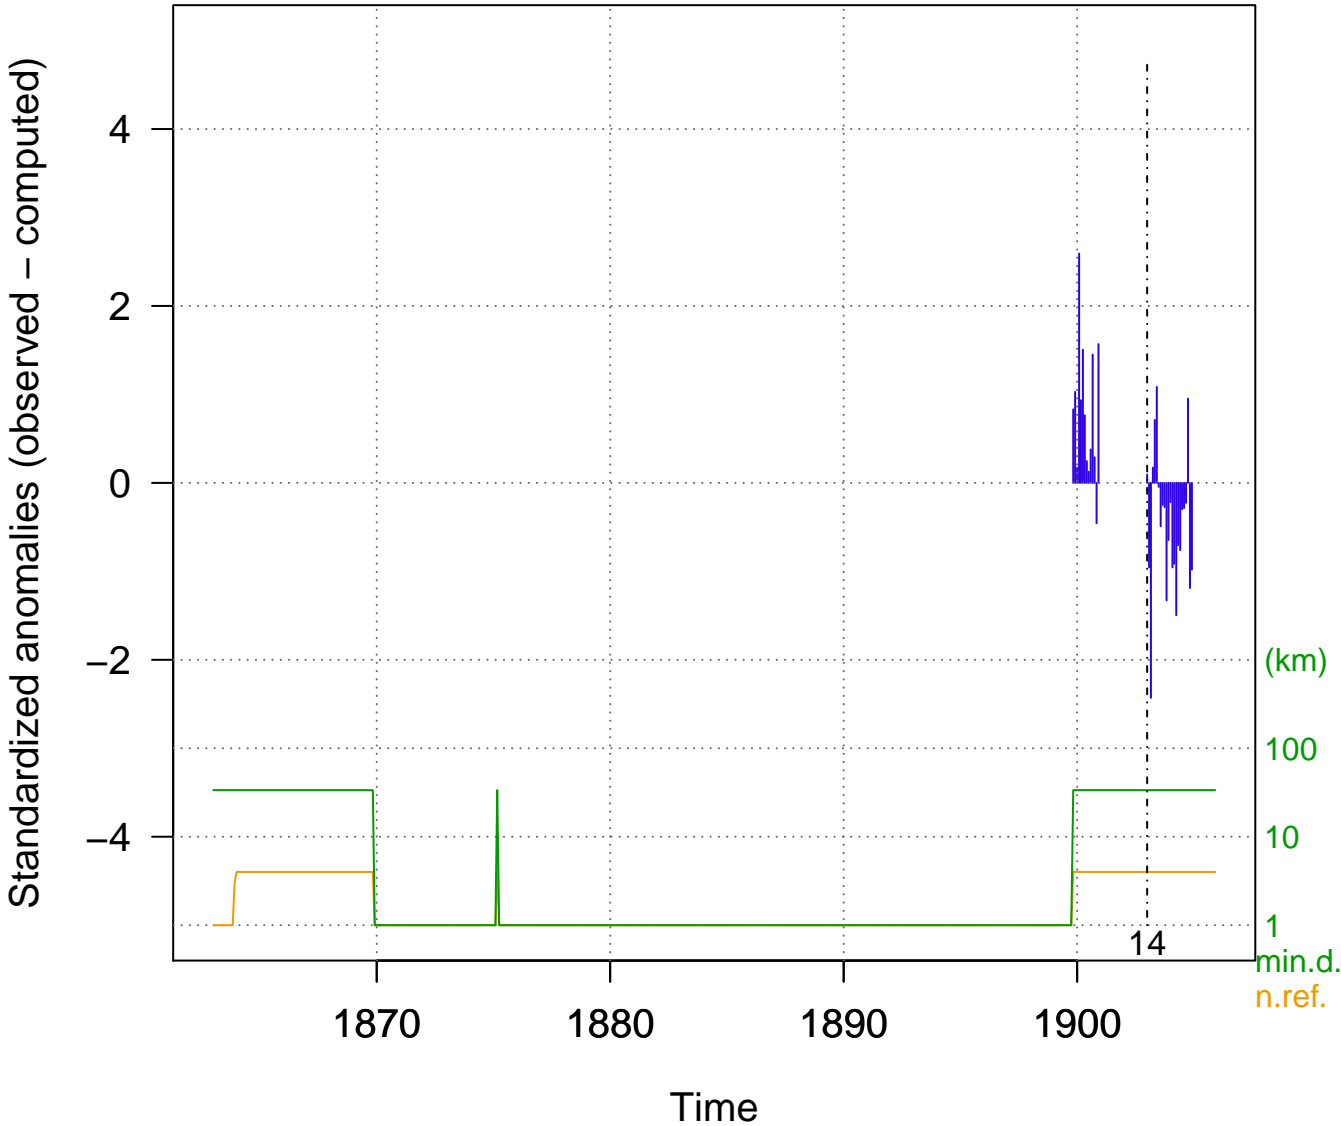

# O3 28 (Evora-2) Evora-2

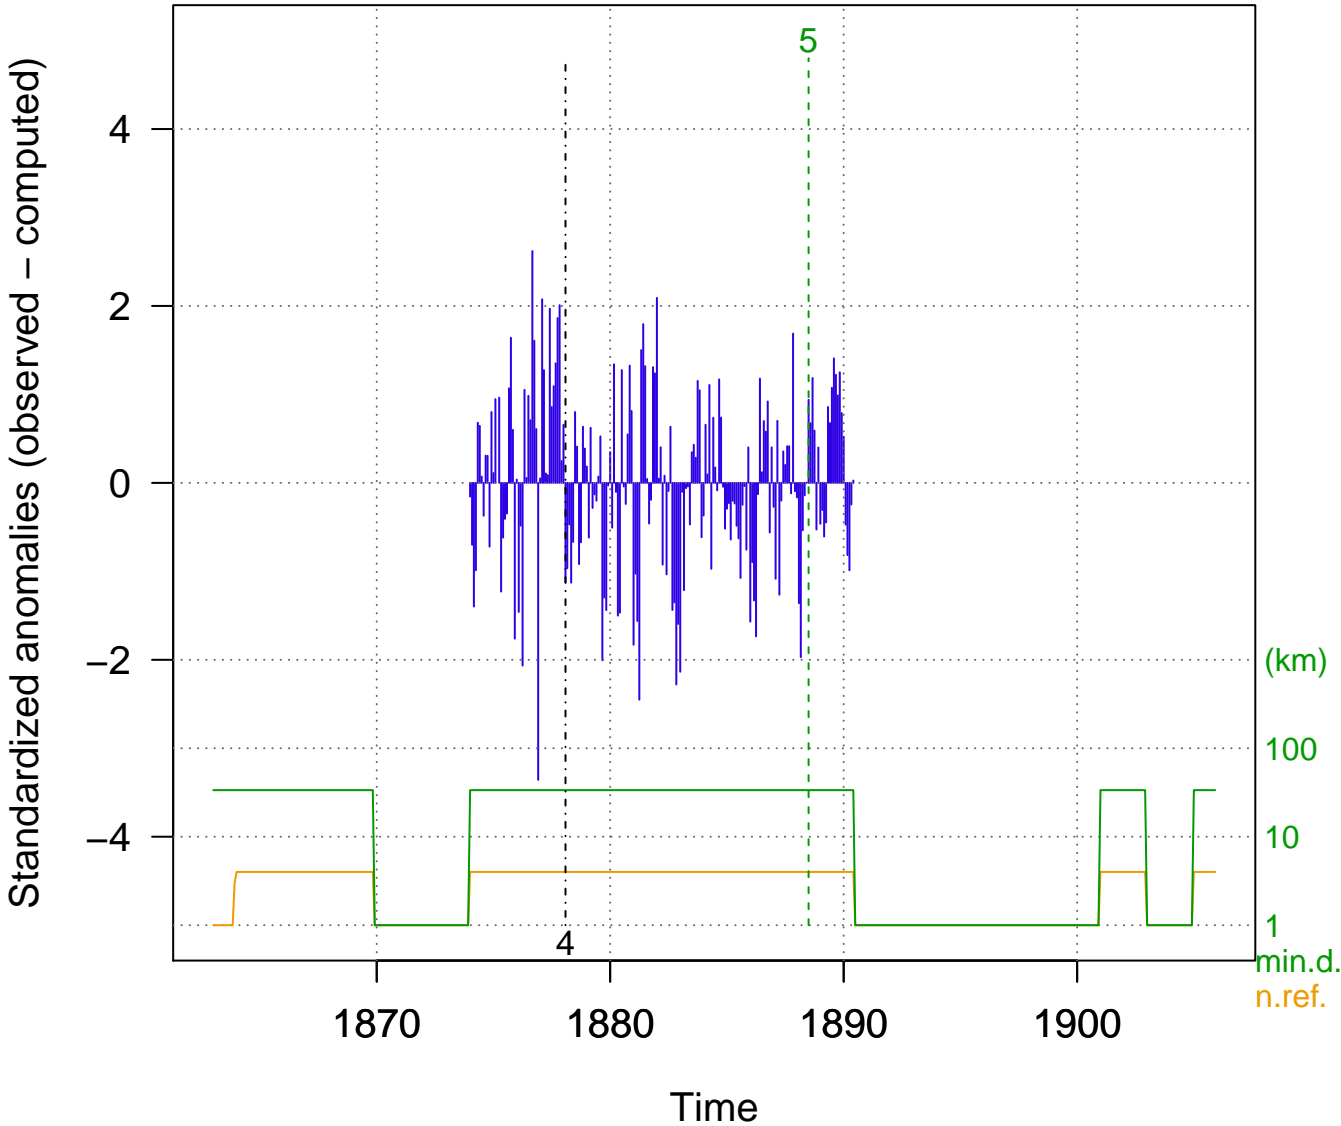

O3 45 (Evora-3)  
Evora-3

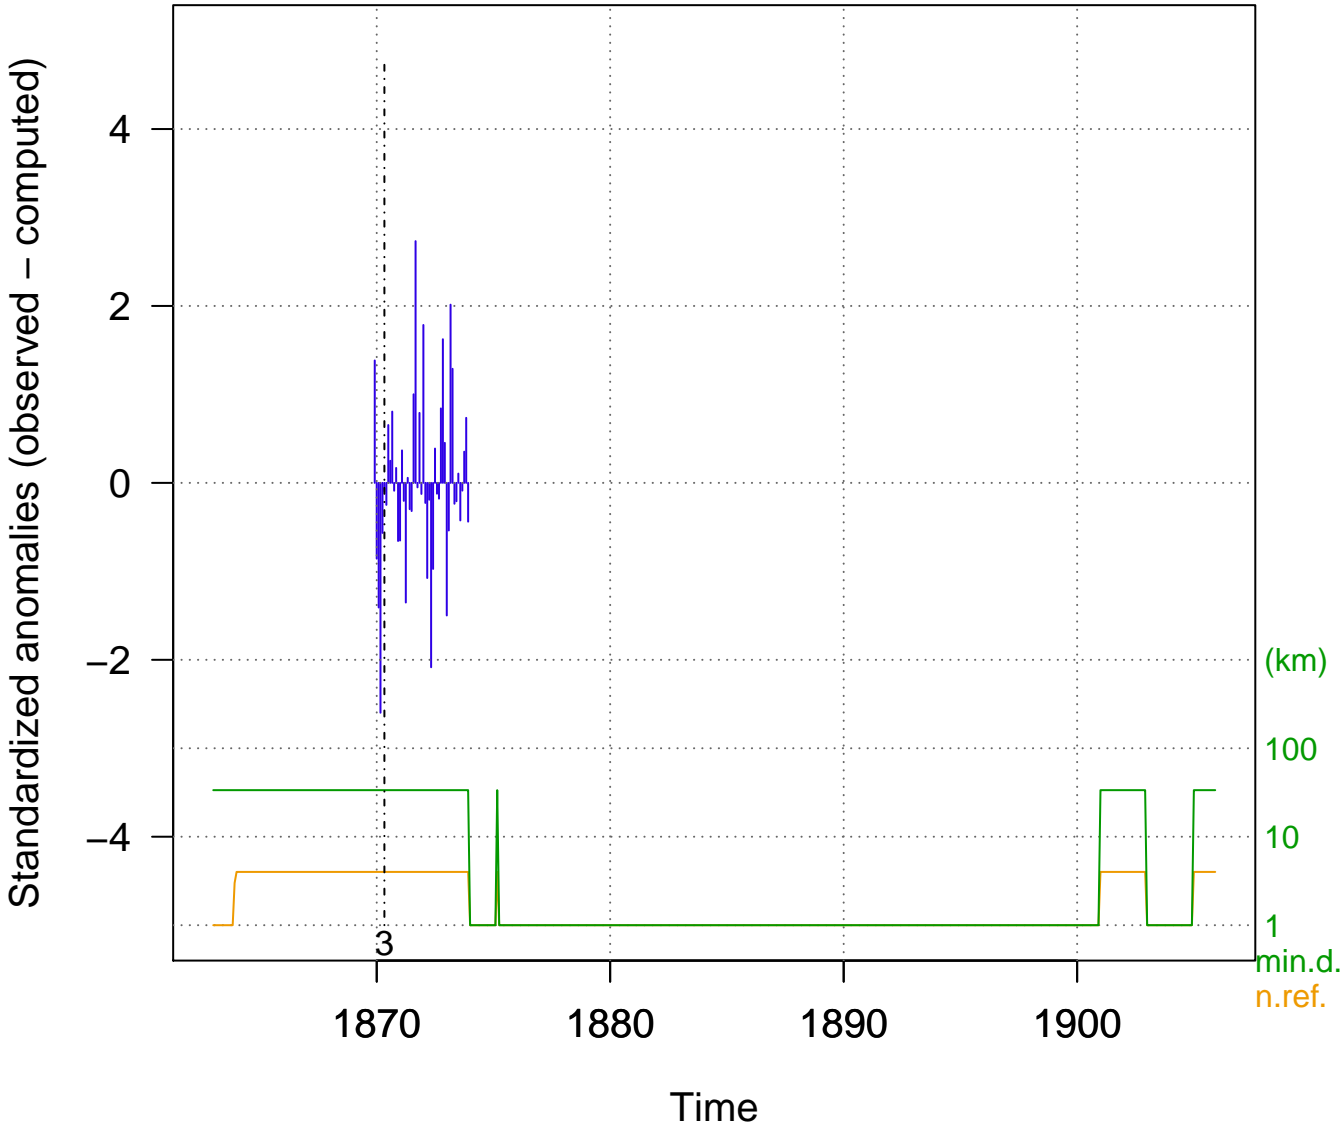

O3 52 (Evora-4)  
Evora-4

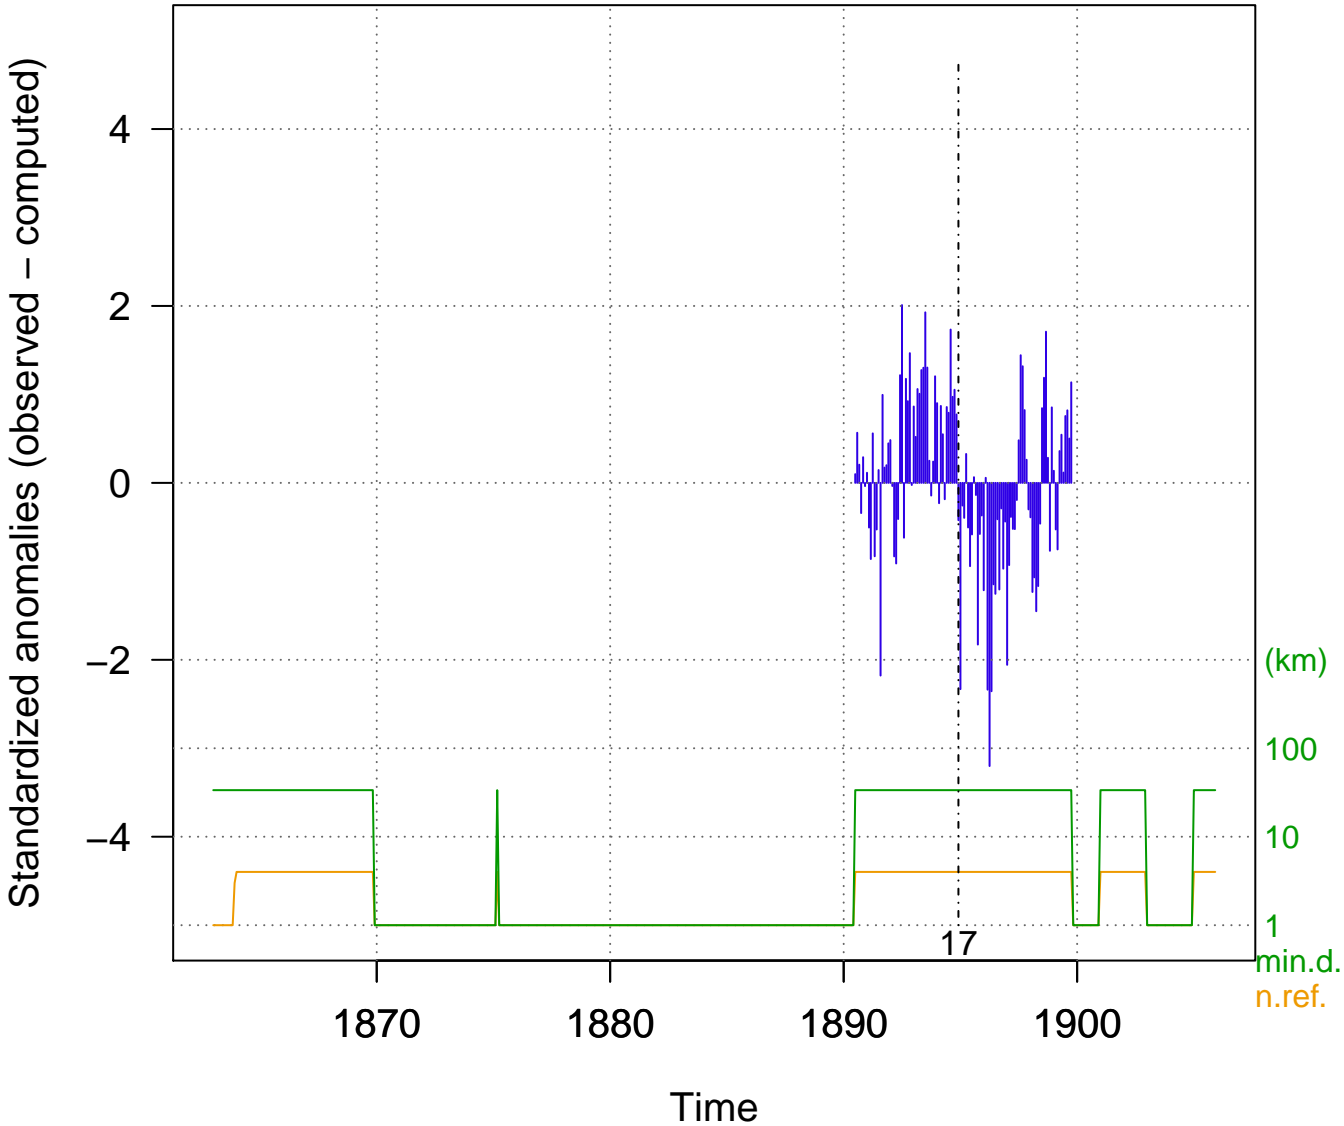

# O3 13 (Villa\_Fernando) Villa Fernando

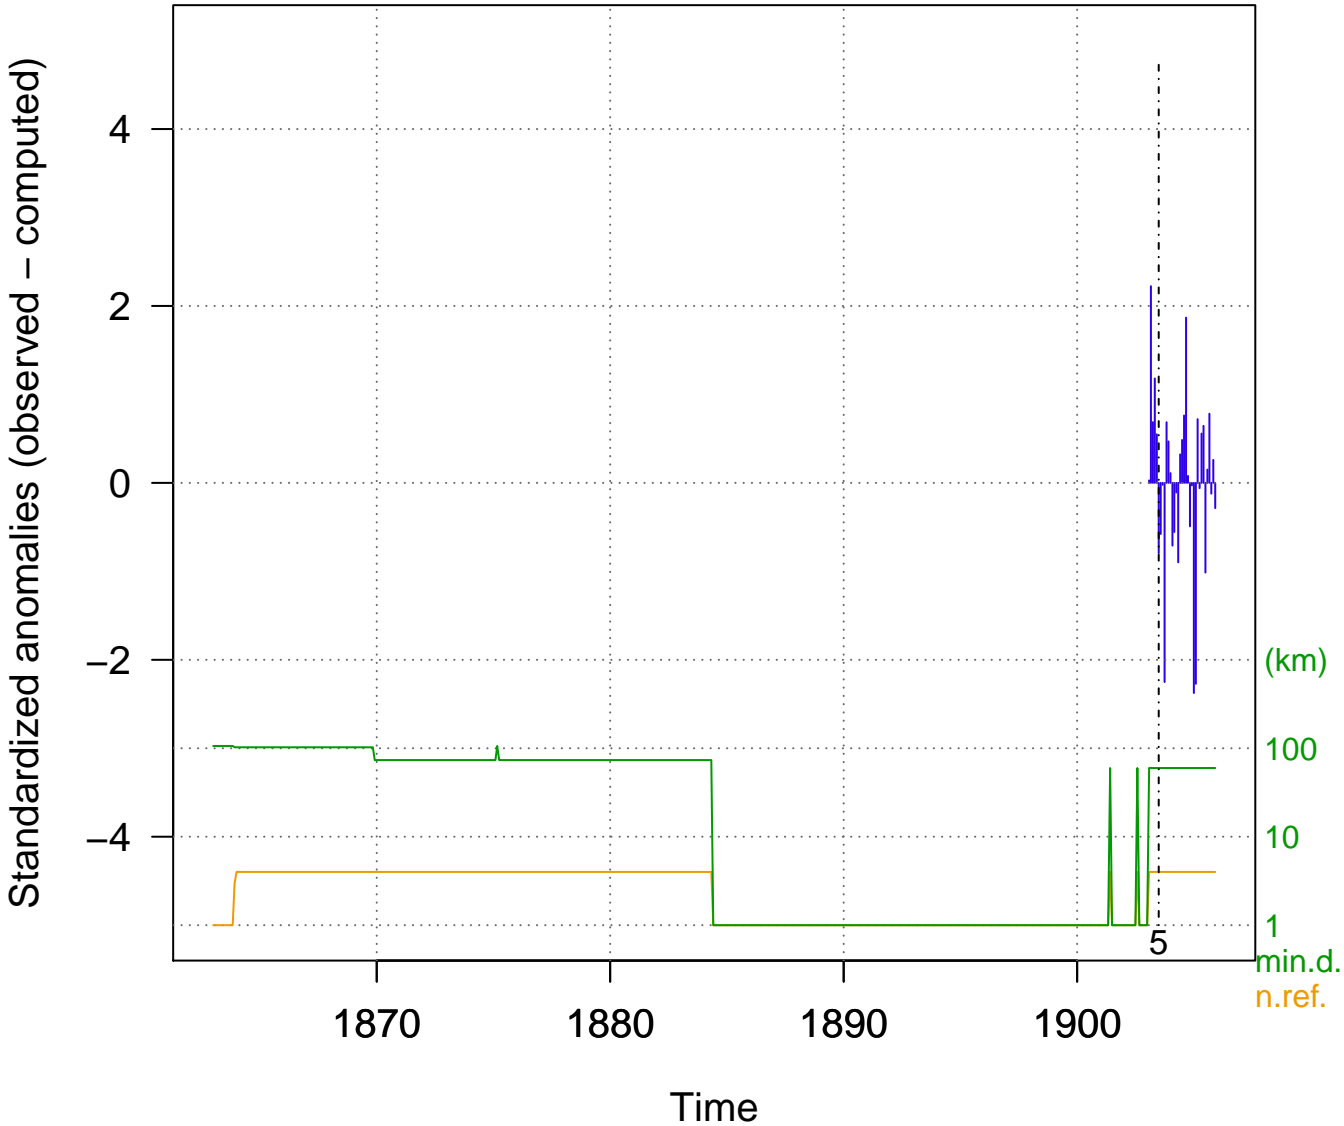

O3 31 (Villa\_Fernando-2)

Villa Fernando-2

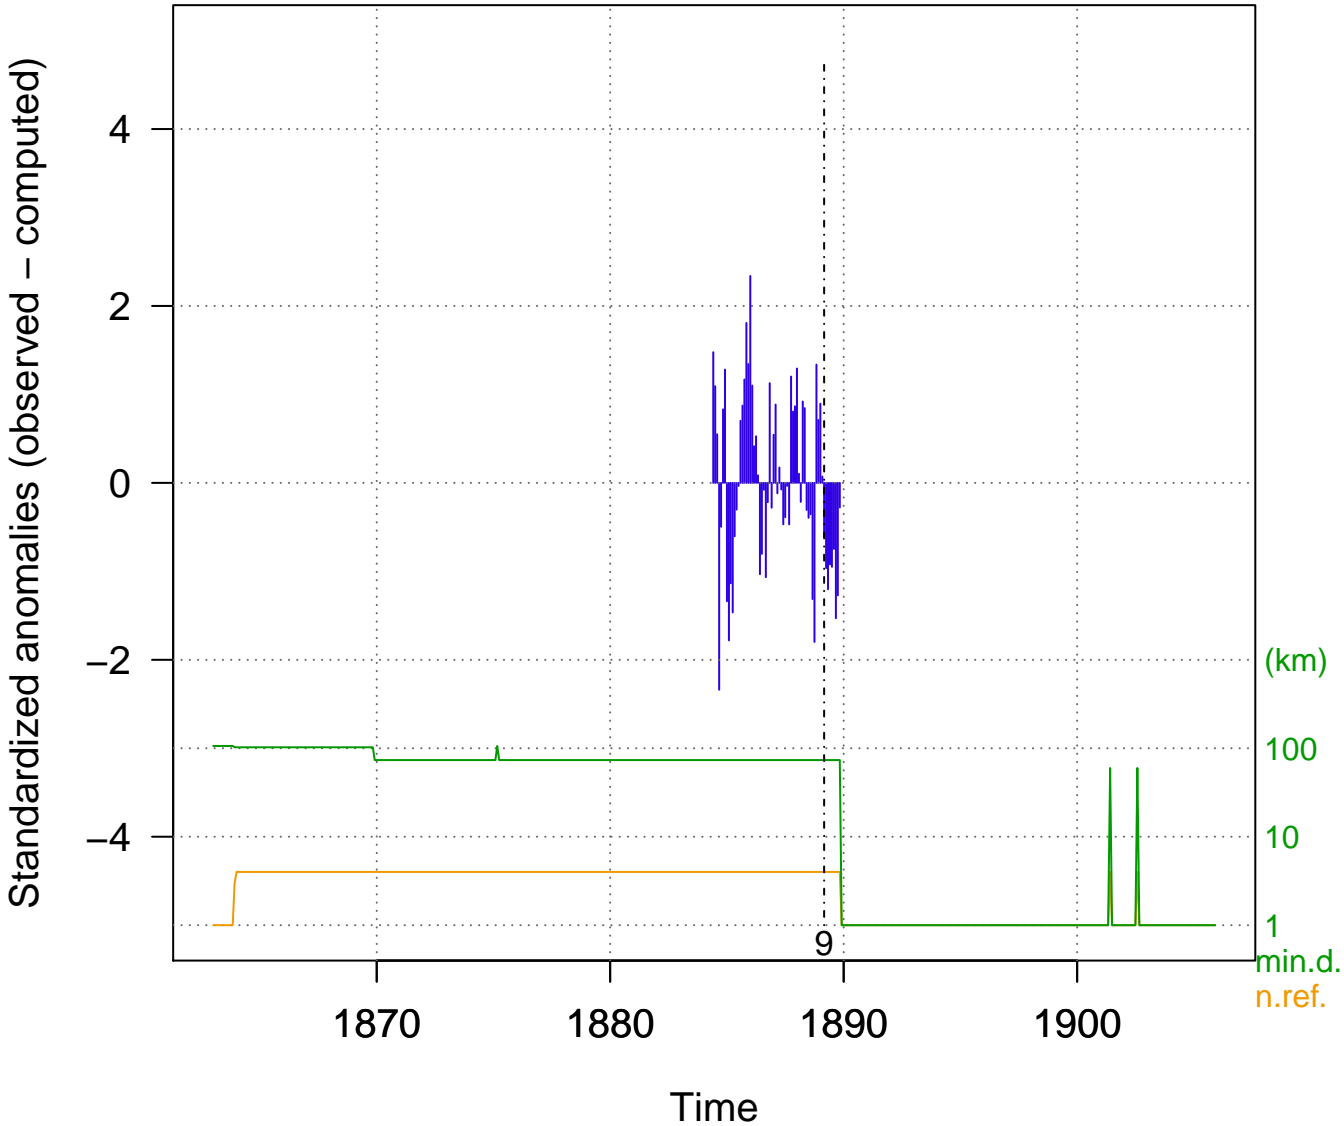

O3 32 (Villa\_Fernando-3)

Villa Fernando-3

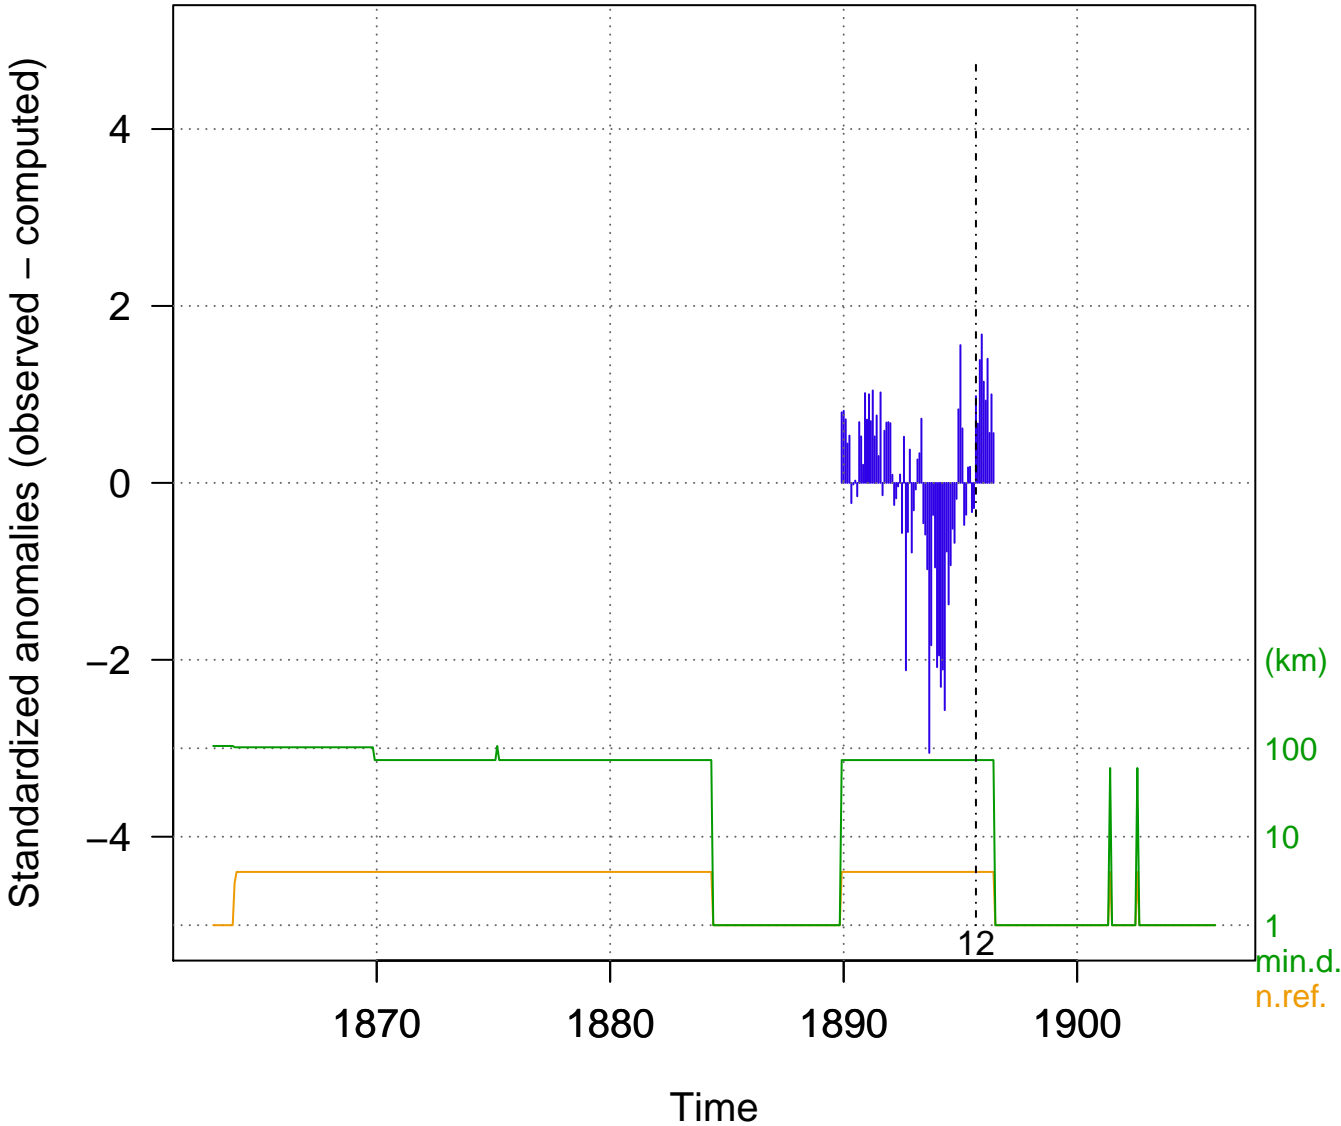



O3 57 (Villa\_Fernando-4)

Villa Fernando-4

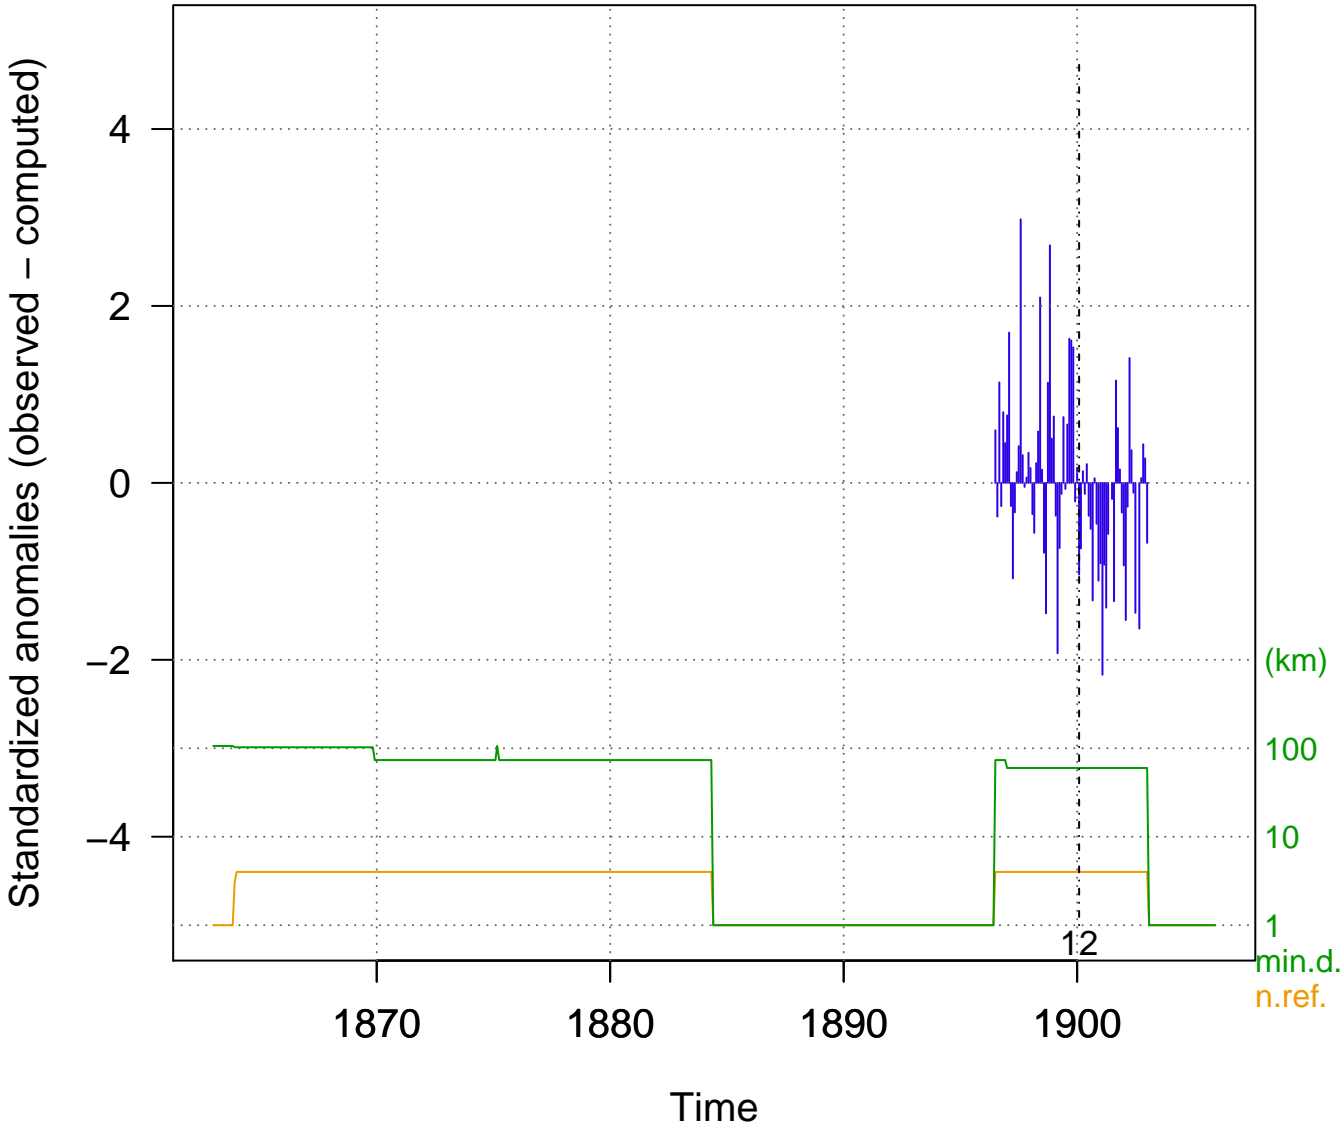

# O3 14 (Beja) Beja

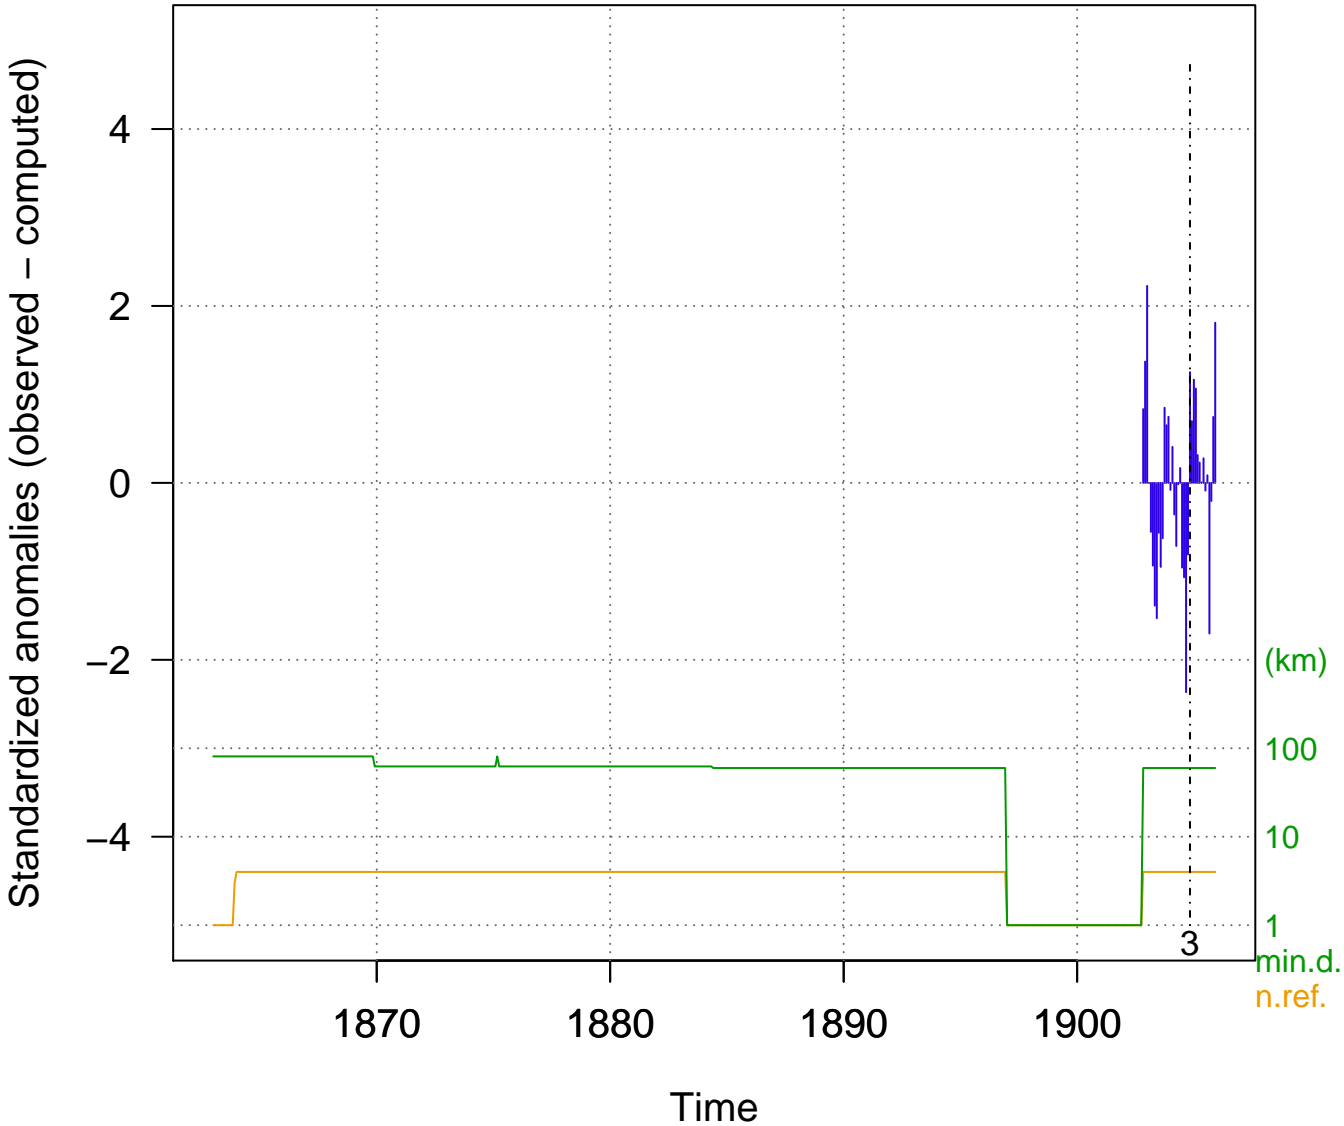

O3 55 (Beja-2)  
Beja-2

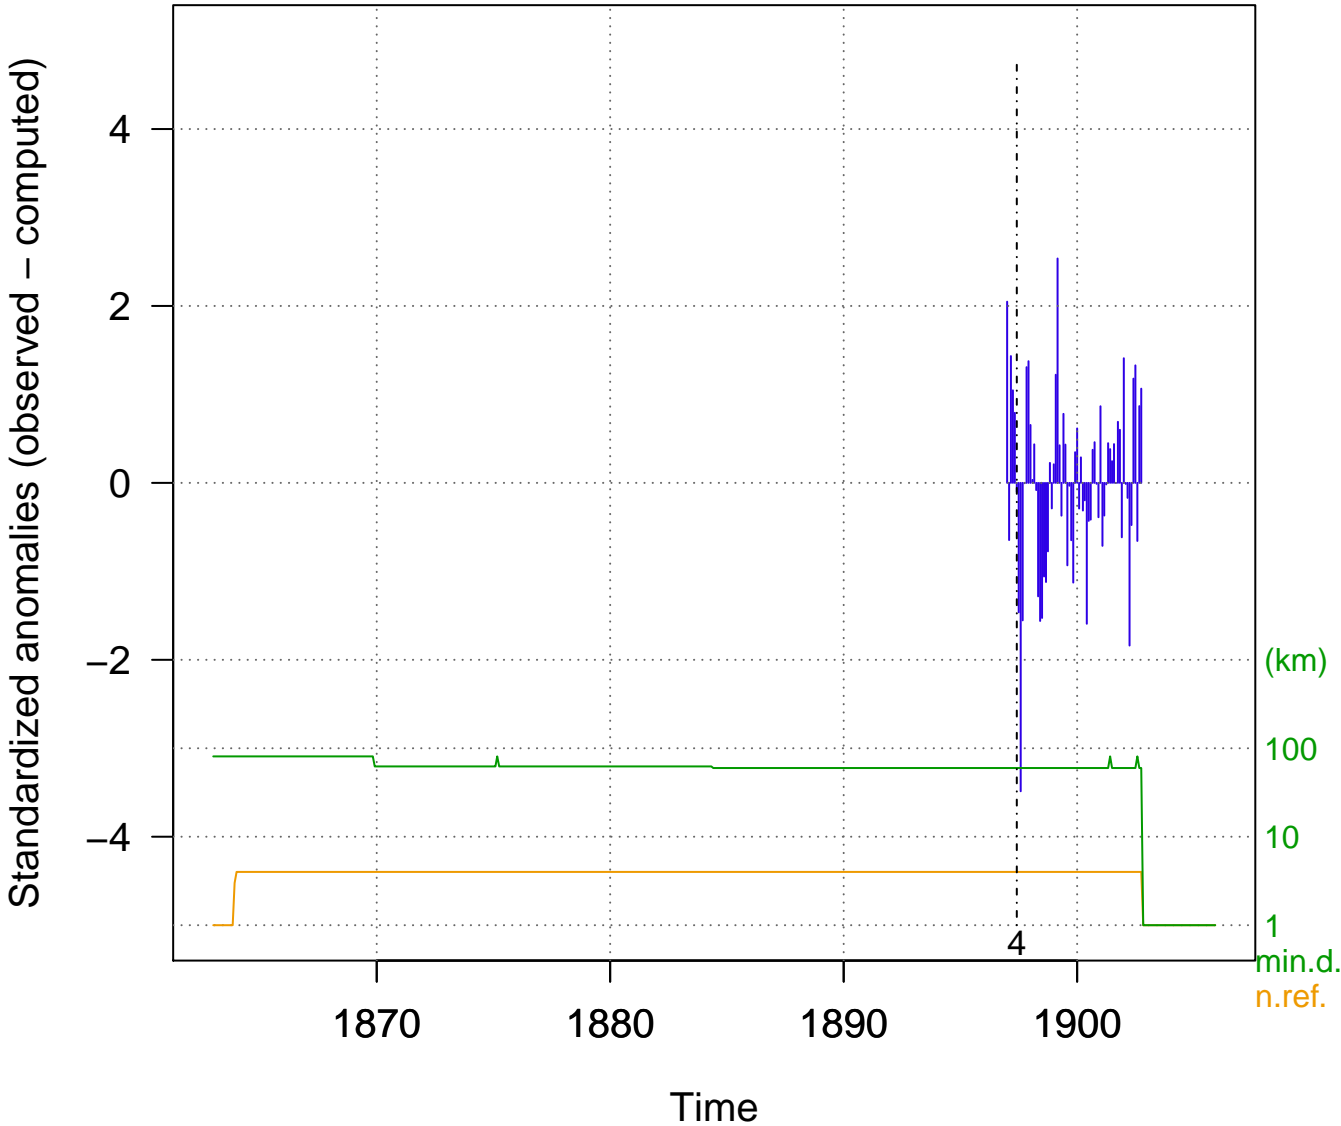

# O3 15 (Ponta\_Delgada) Ponta Delgada

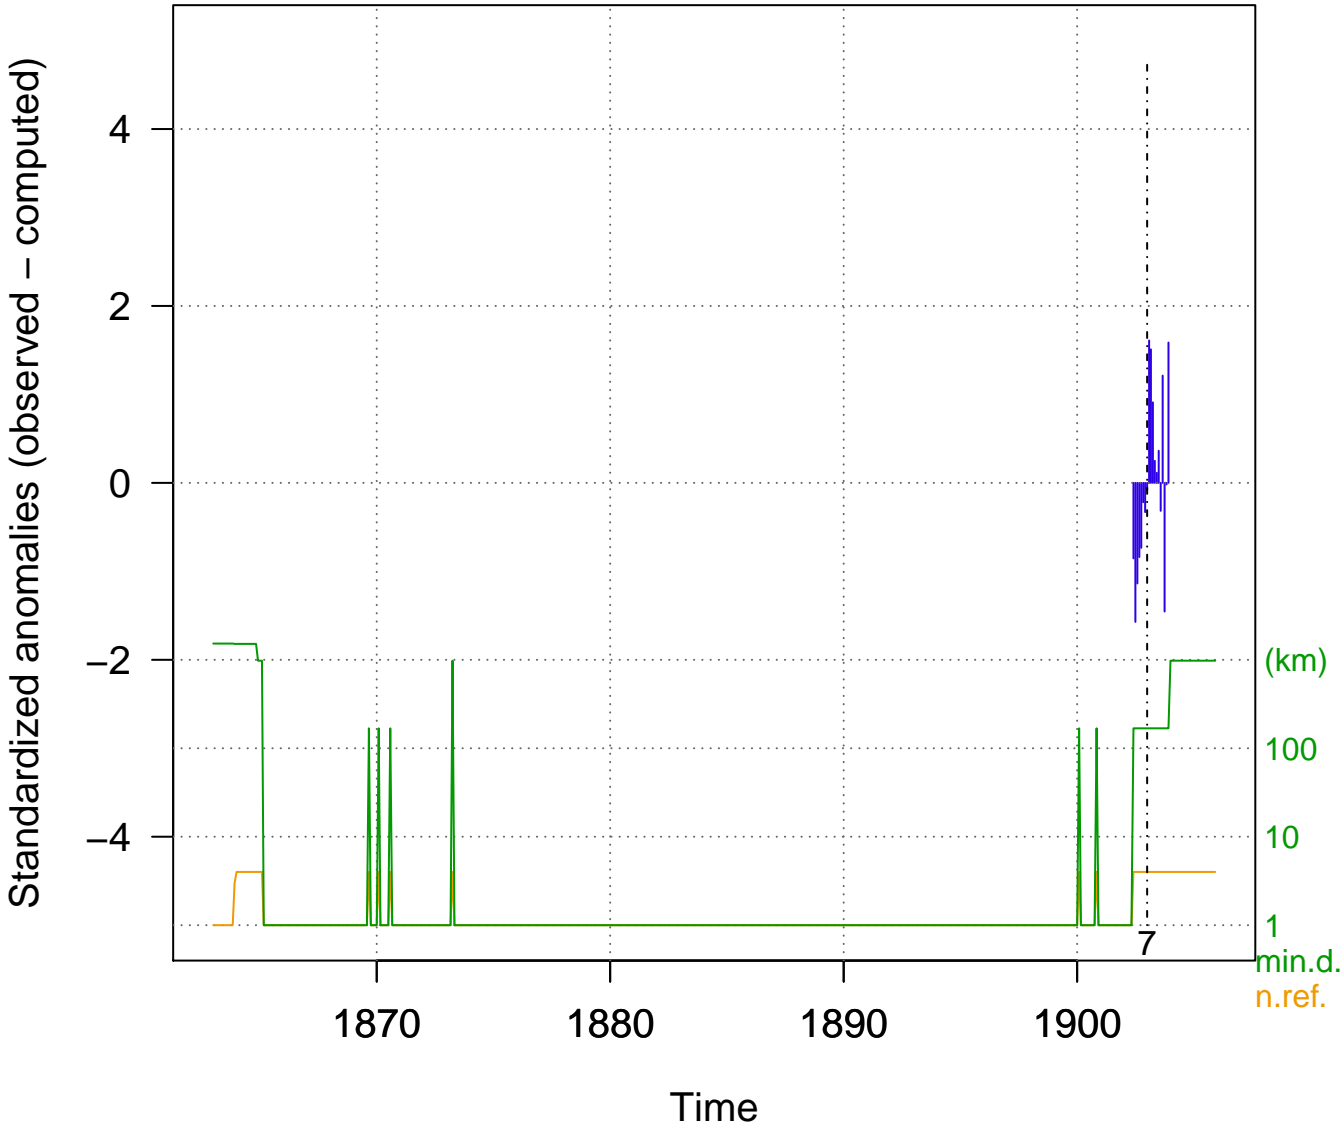

# O3 25 (Ponta\_Delgada-2) Ponta Delgada-2

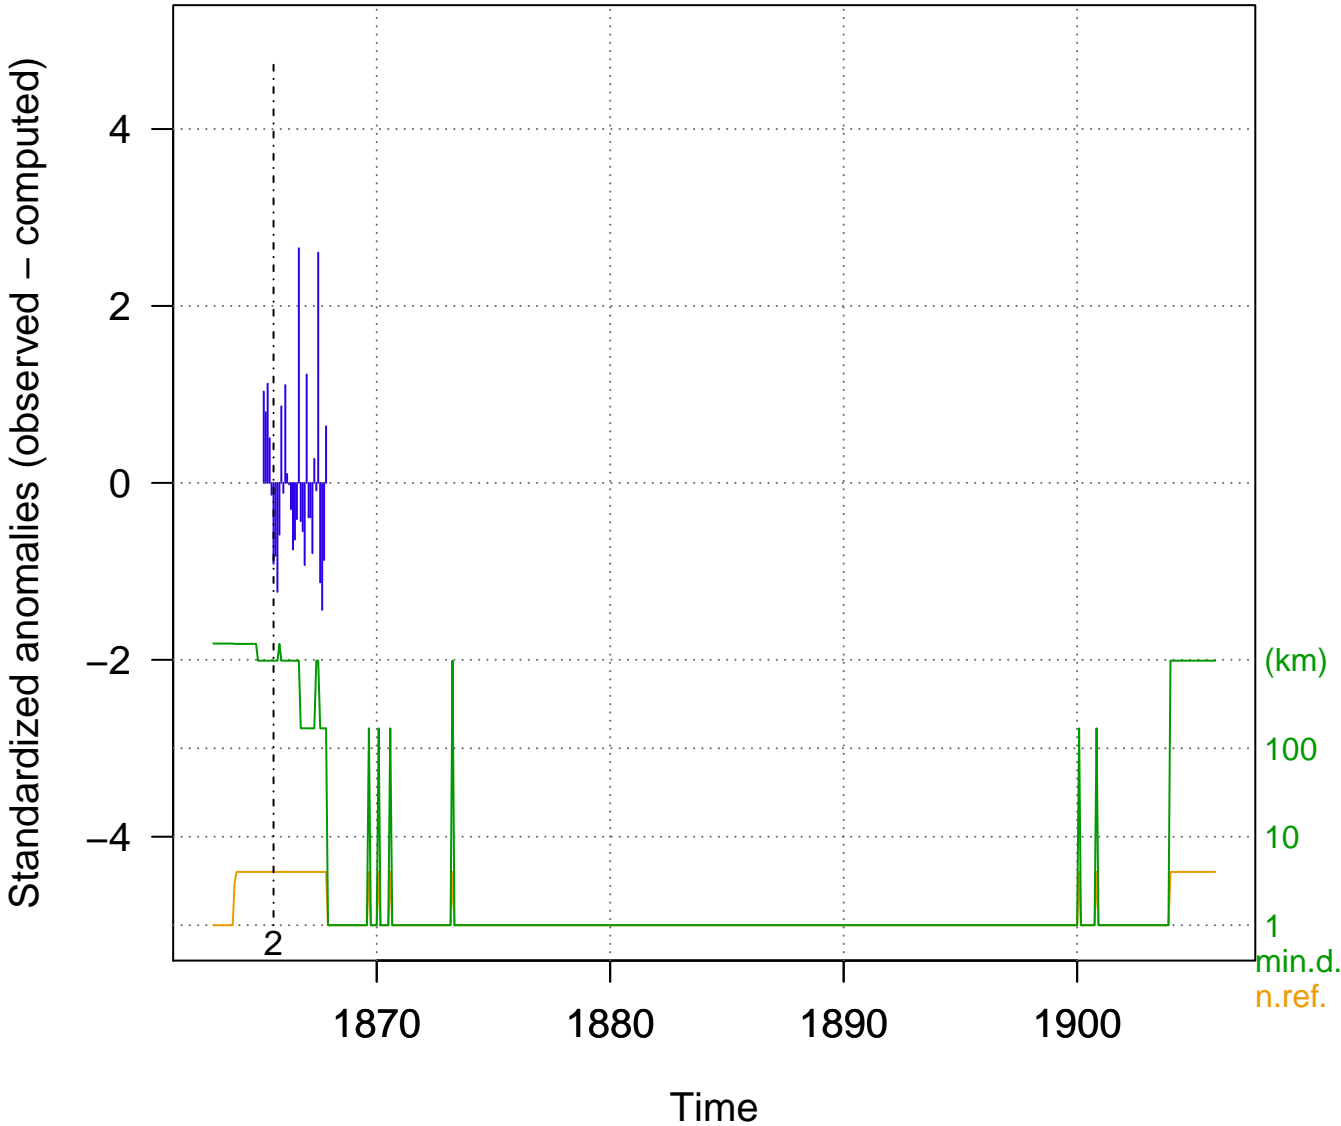

**O3 37 (Ponta\_Delgada-3)**  
**Ponta Delgada-3**

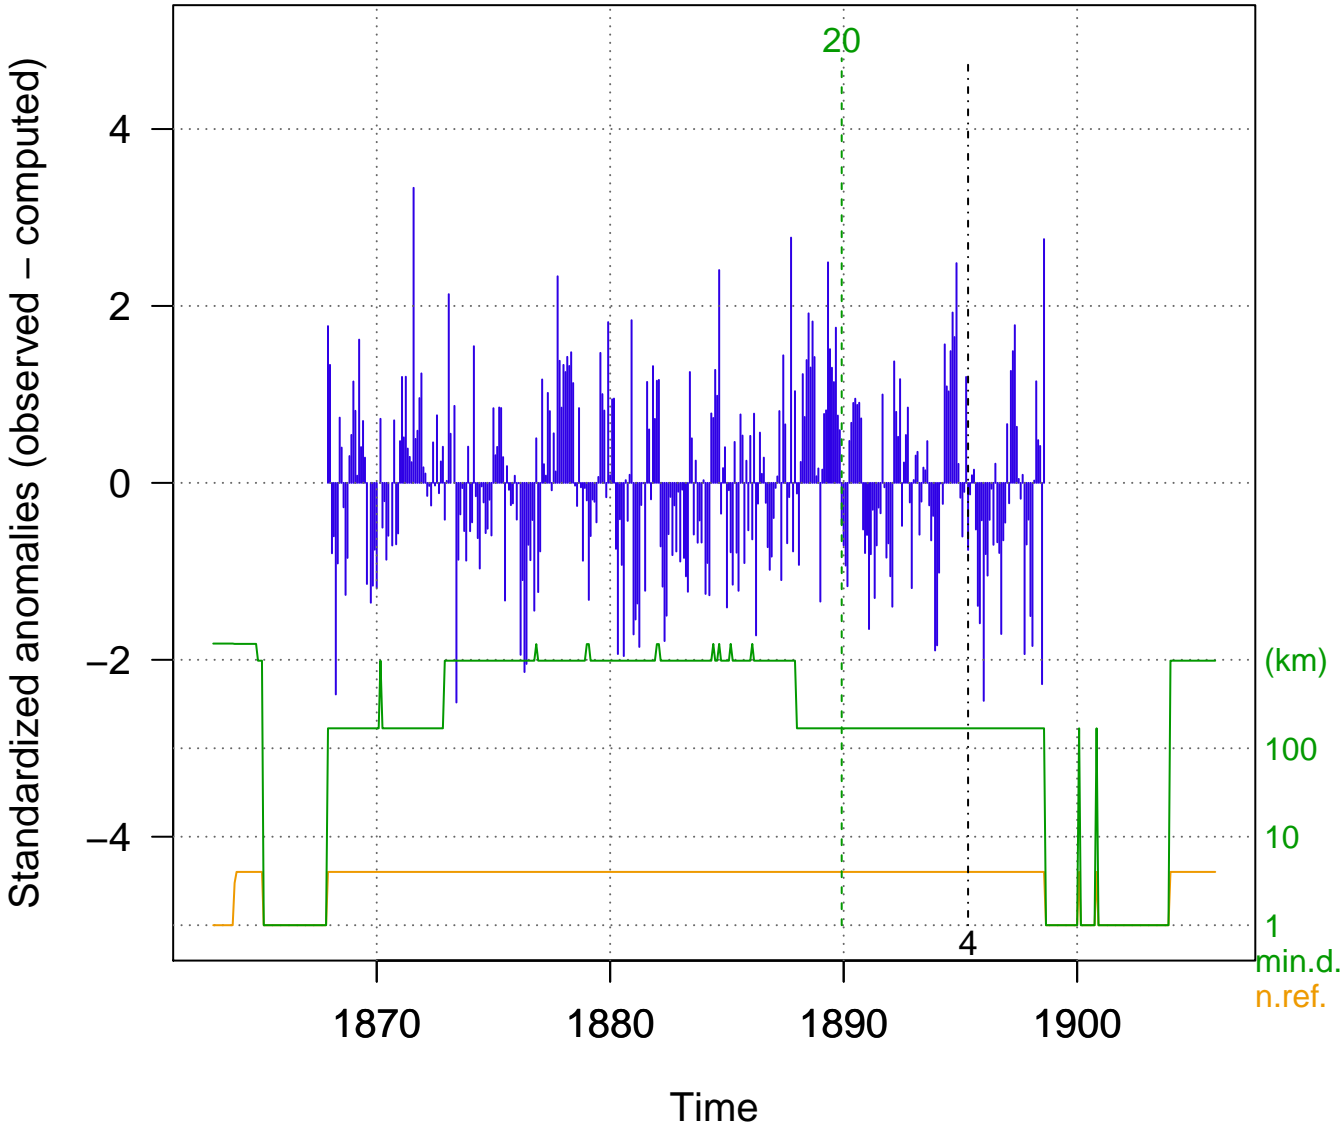

**O3 62 (Ponta\_Delgada-4)**  
**Ponta Delgada-4**

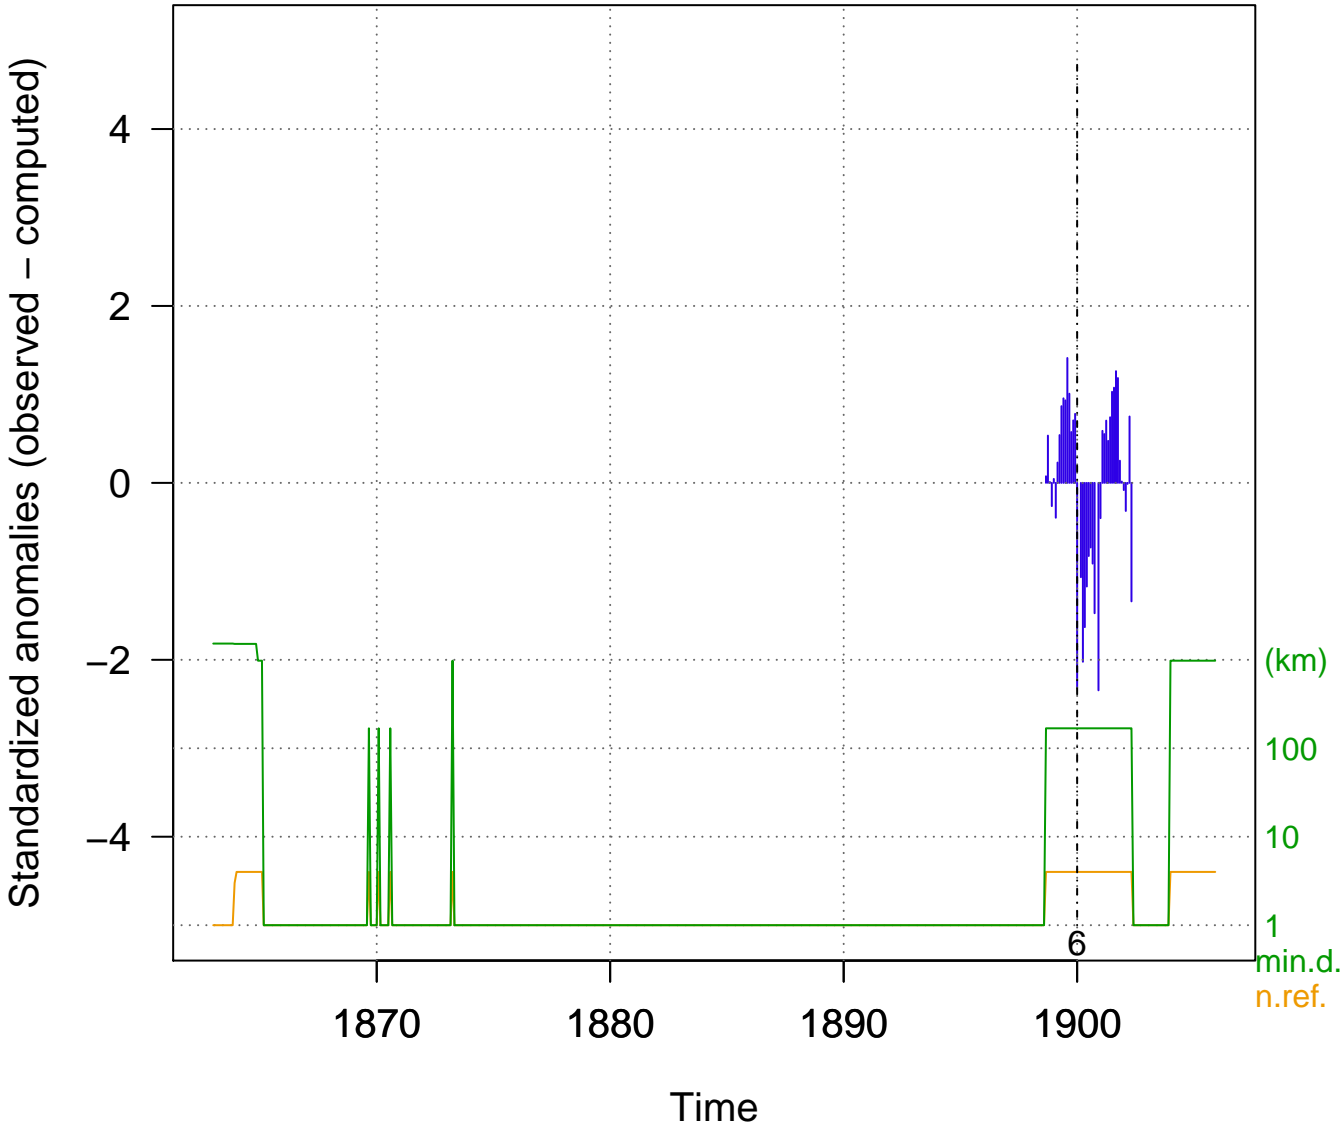

# O3 16 (Lagos) Lagos

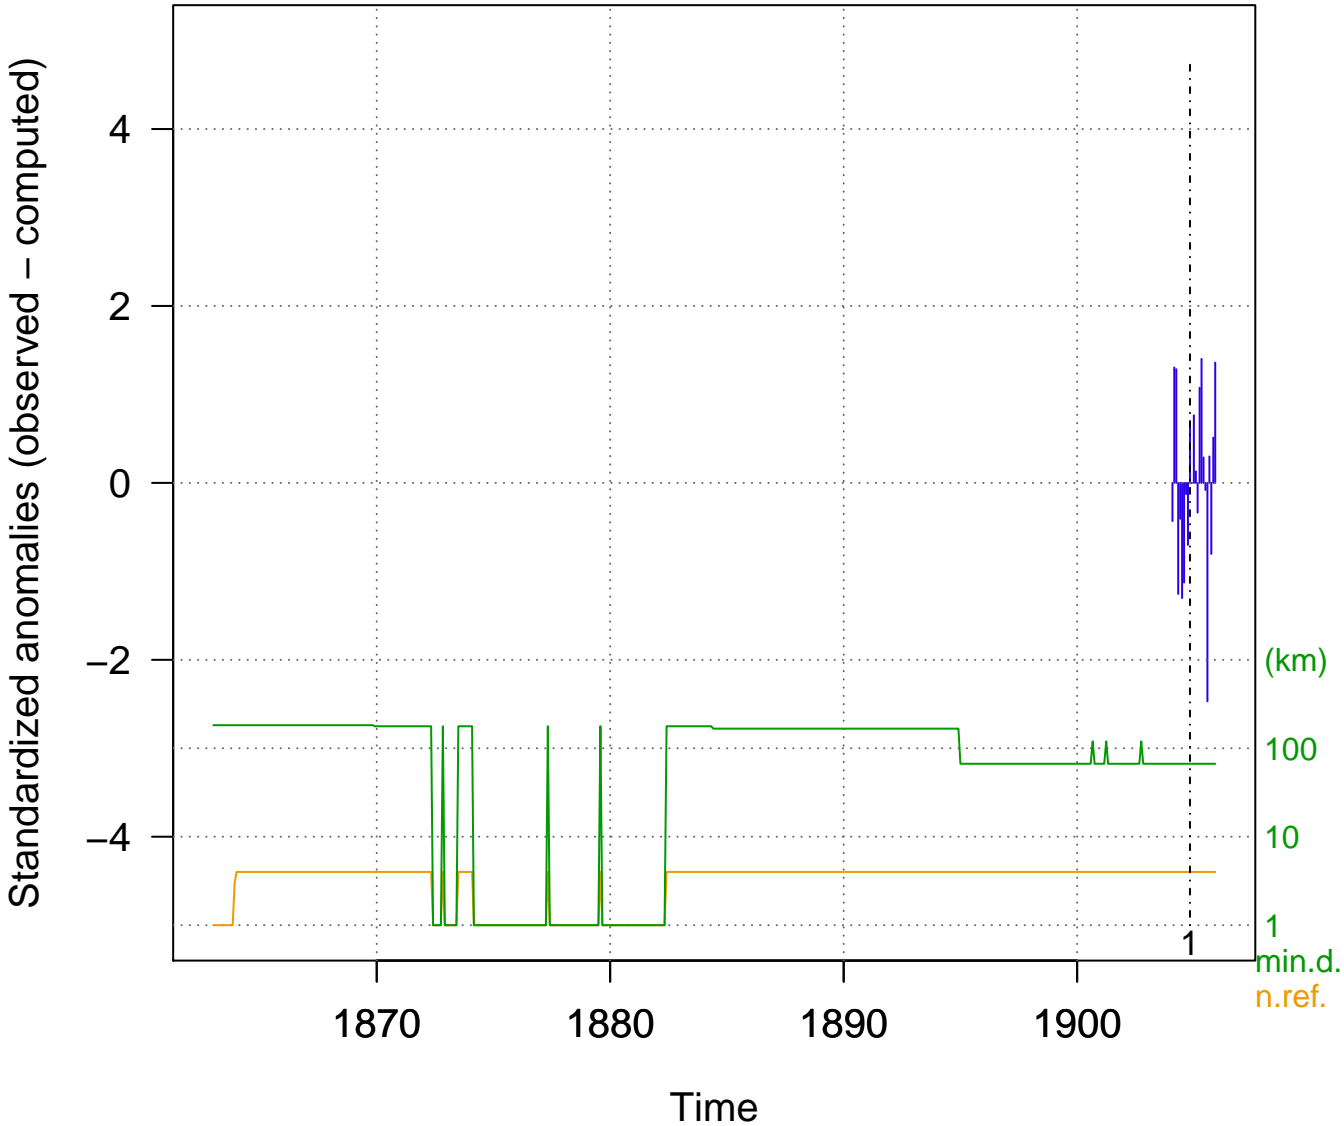



# O3 29 (Lagos-2) Lagos-2

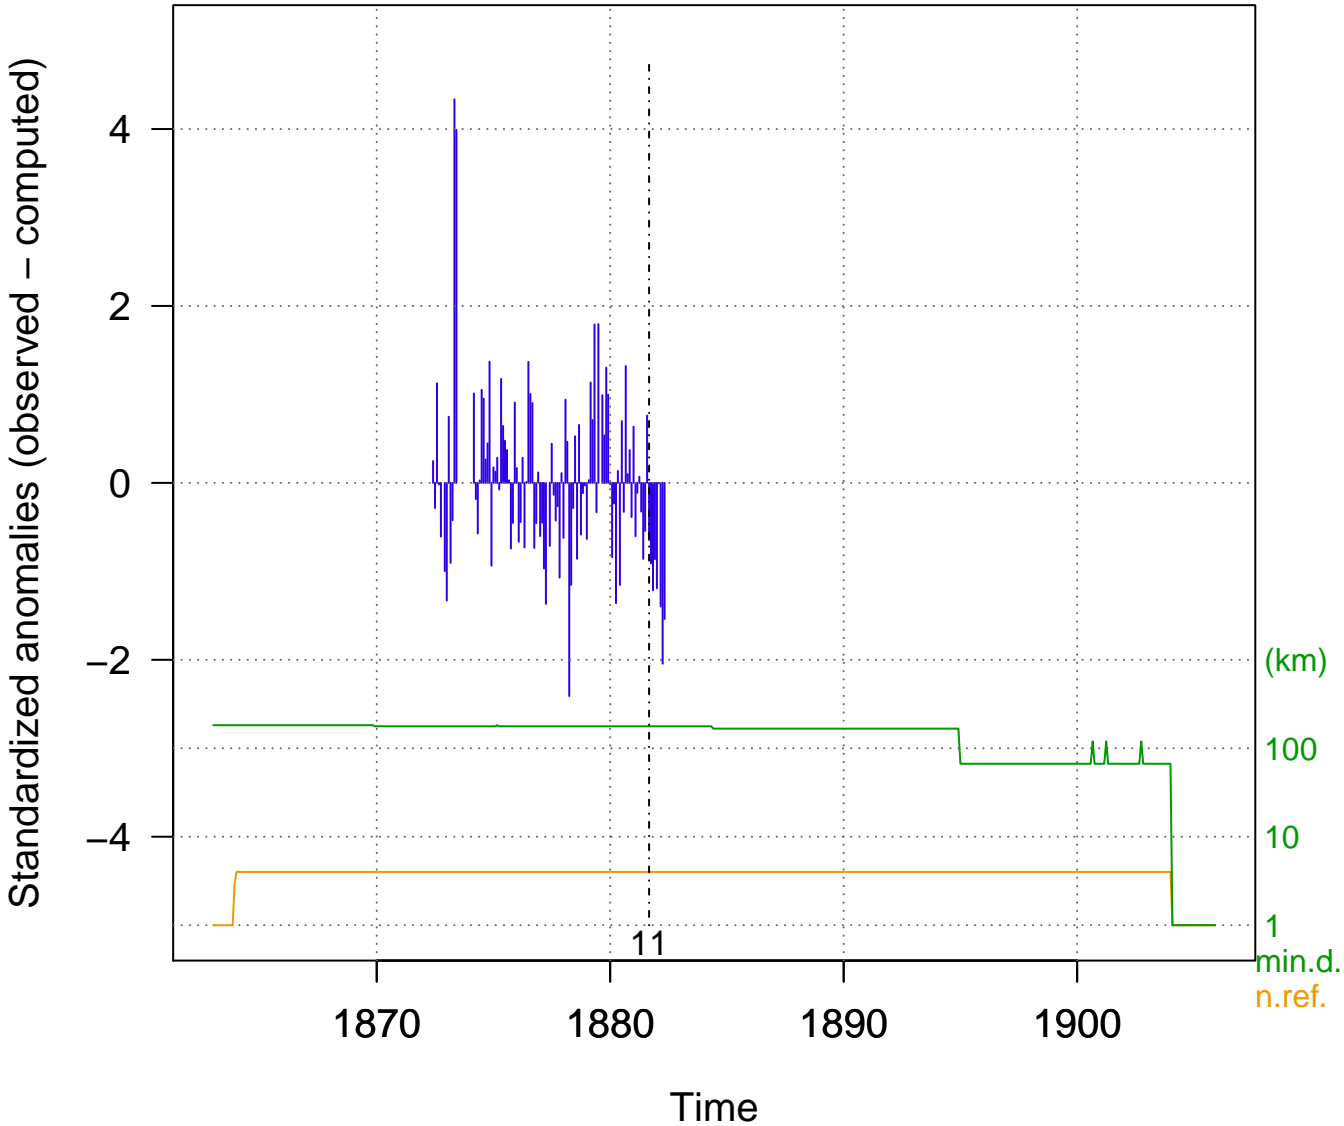

# O3 17 (Faro) Faro

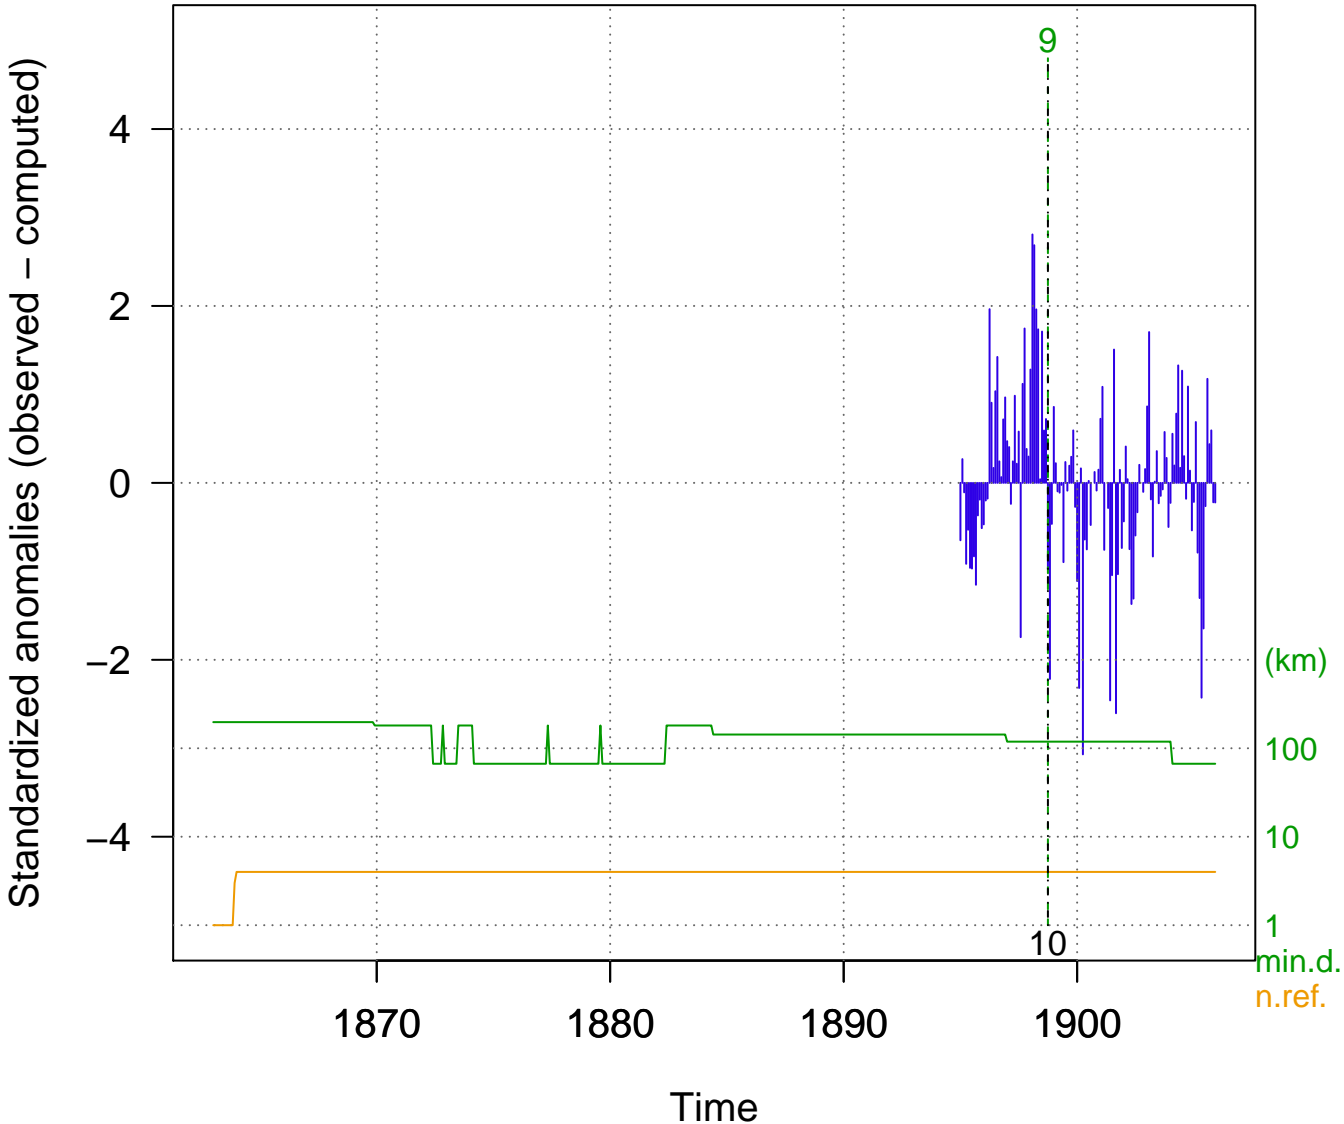

# O3 18 (Funchal) Funchal

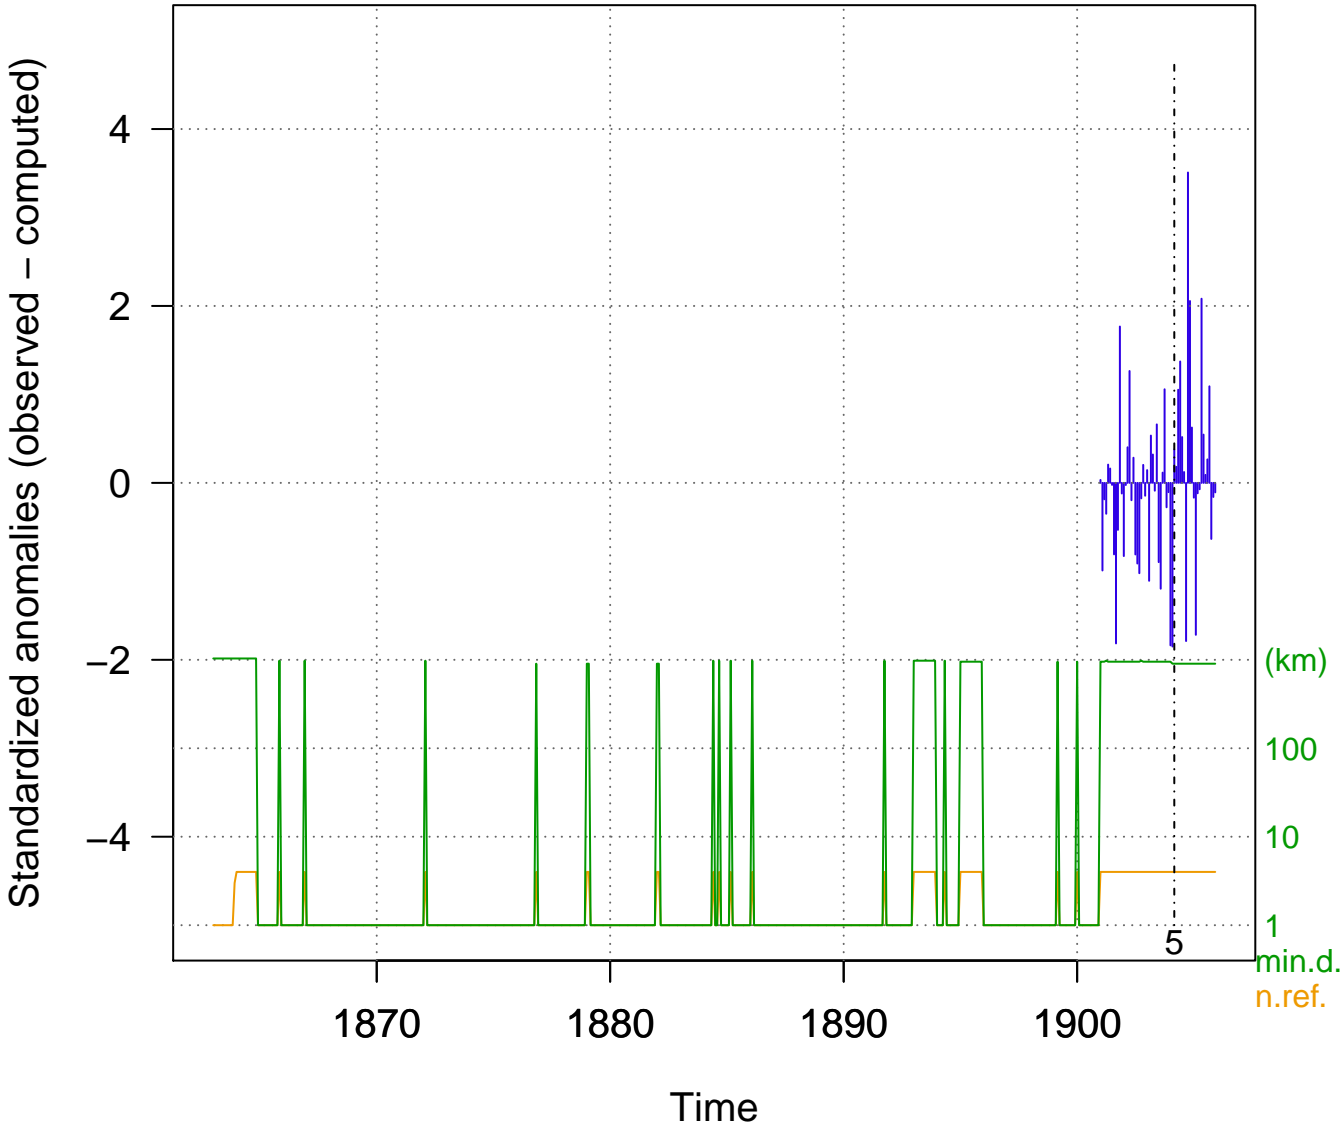

# O3 35 (Funchal-2) Funchal-2

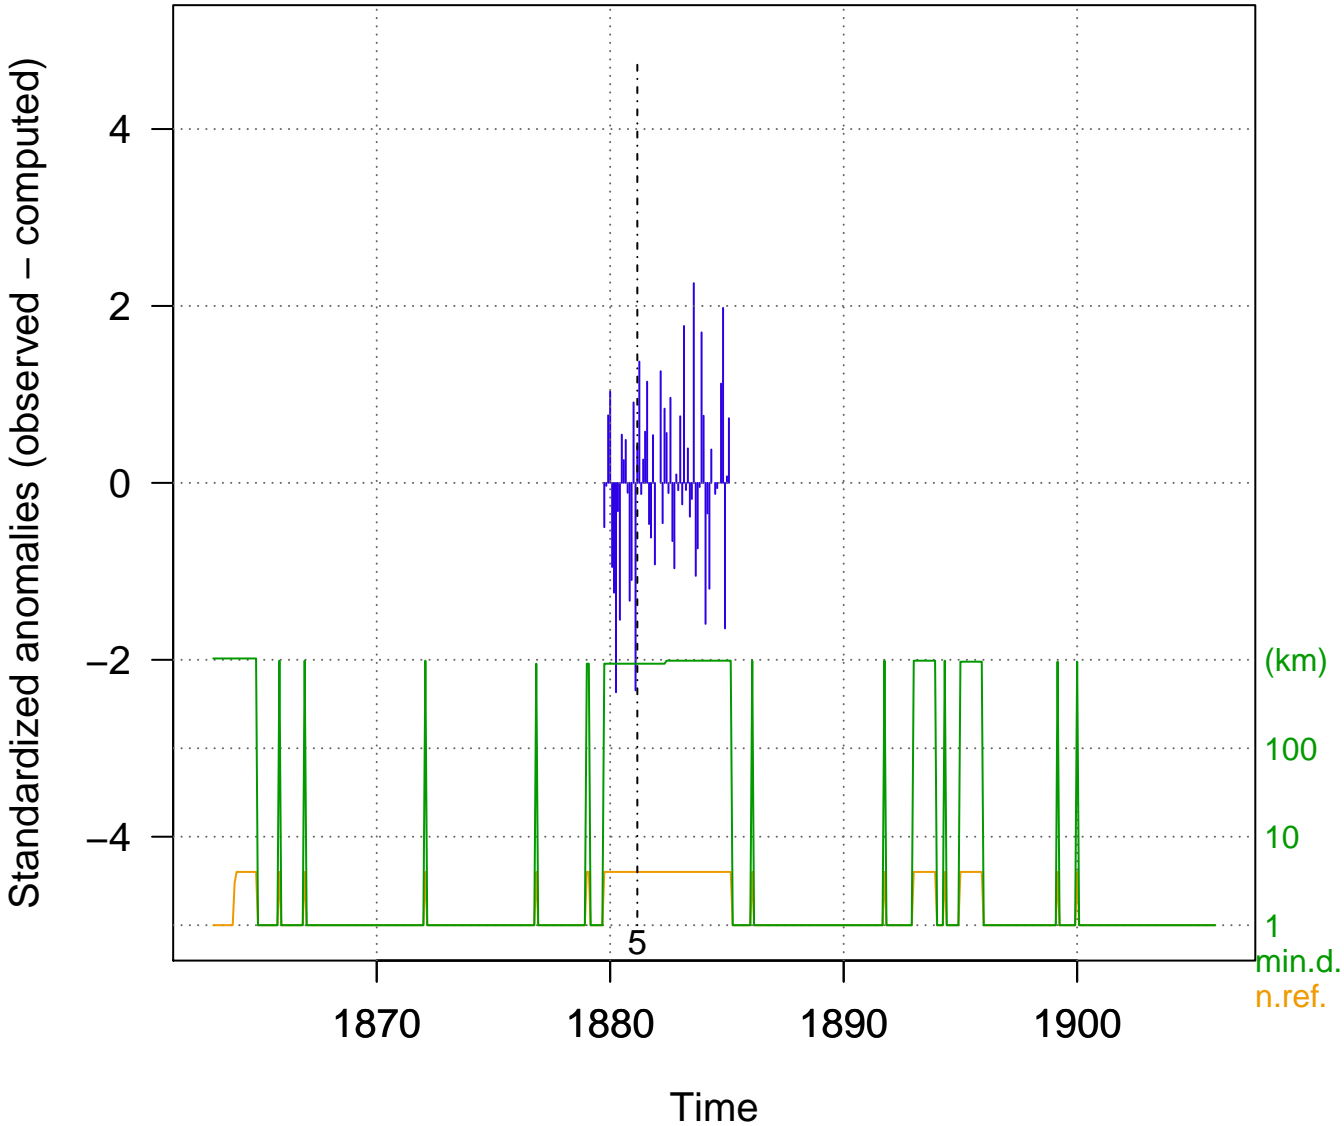

# O3 41 (Funchal-3) Funchal-3

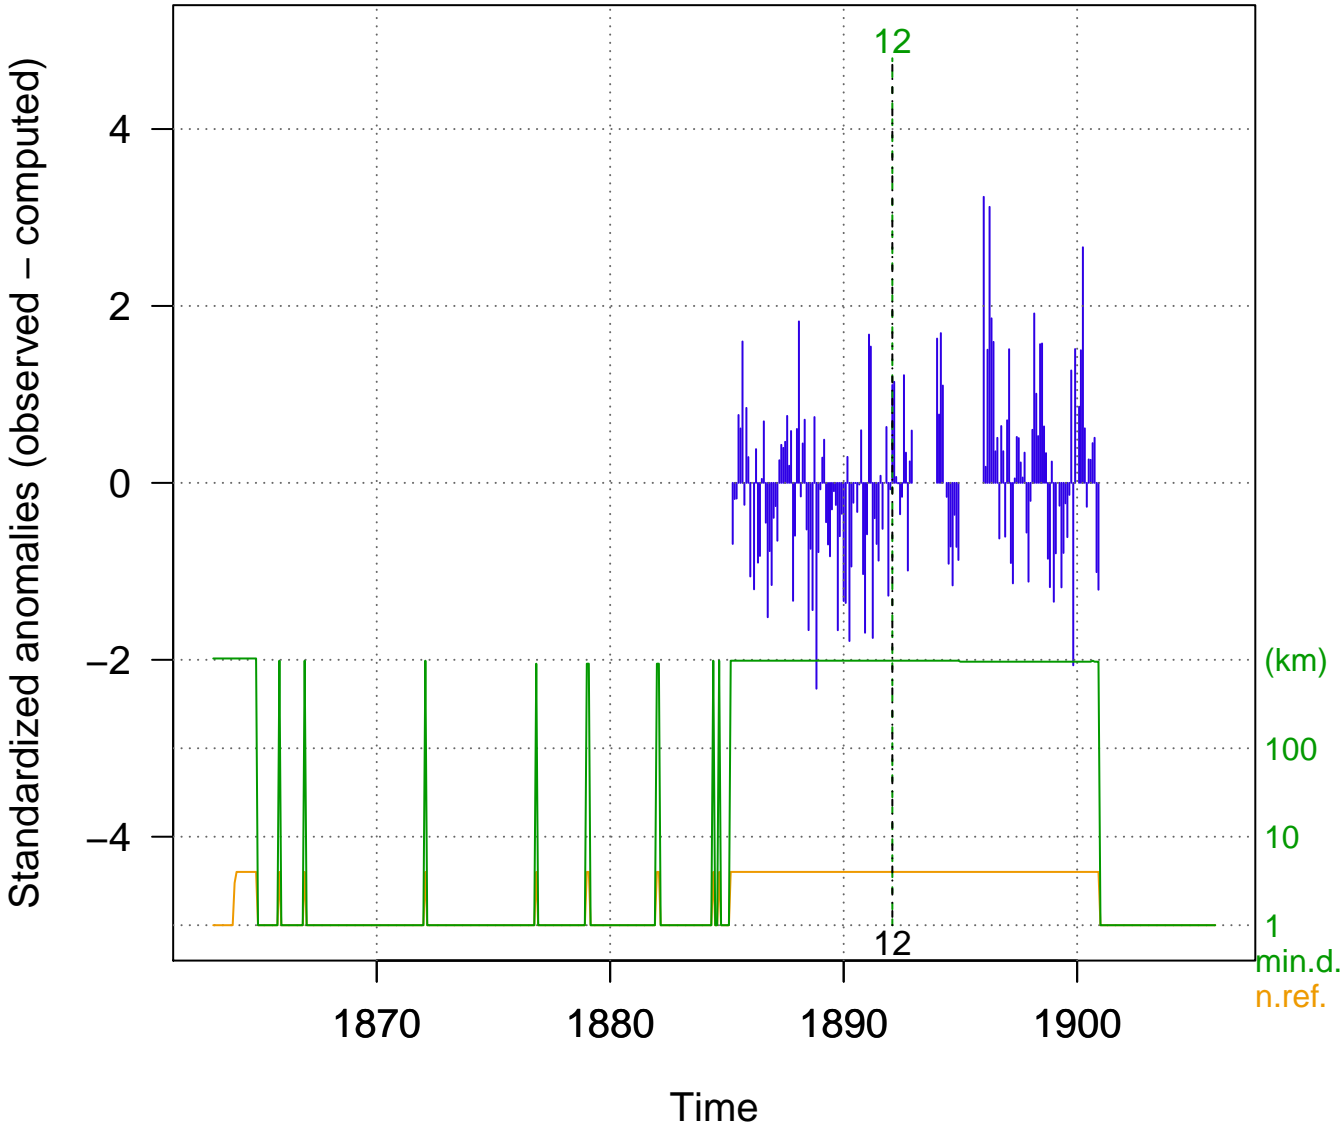

# O3 43 (Funchal-4) Funchal-4

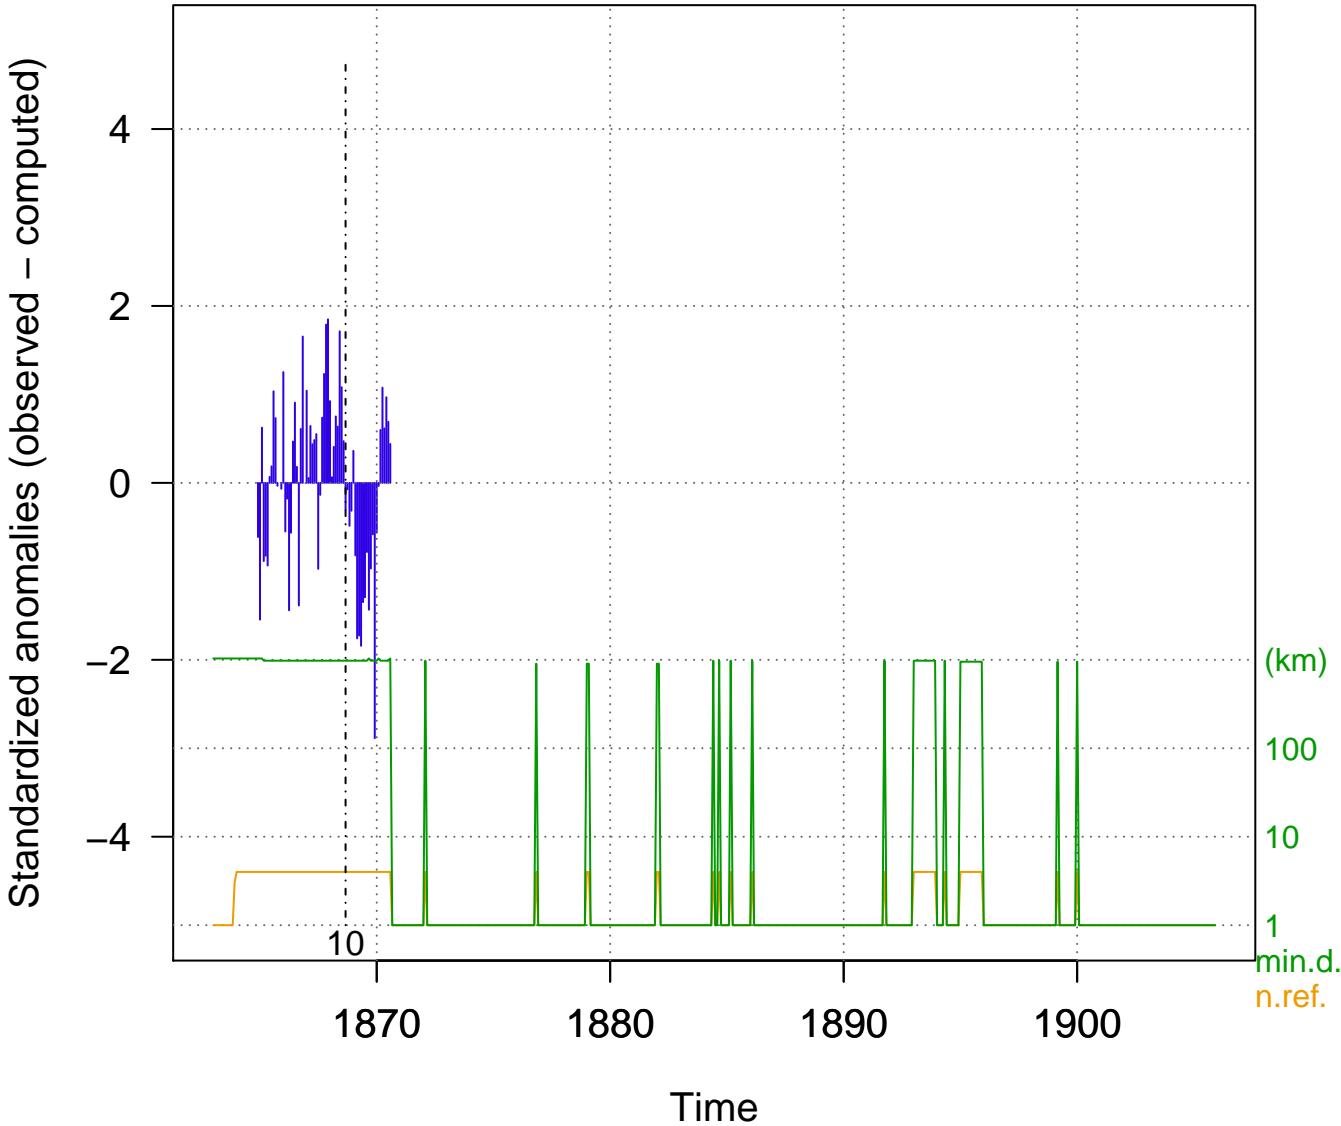

# O3 65 (Funchal-5) Funchal-5

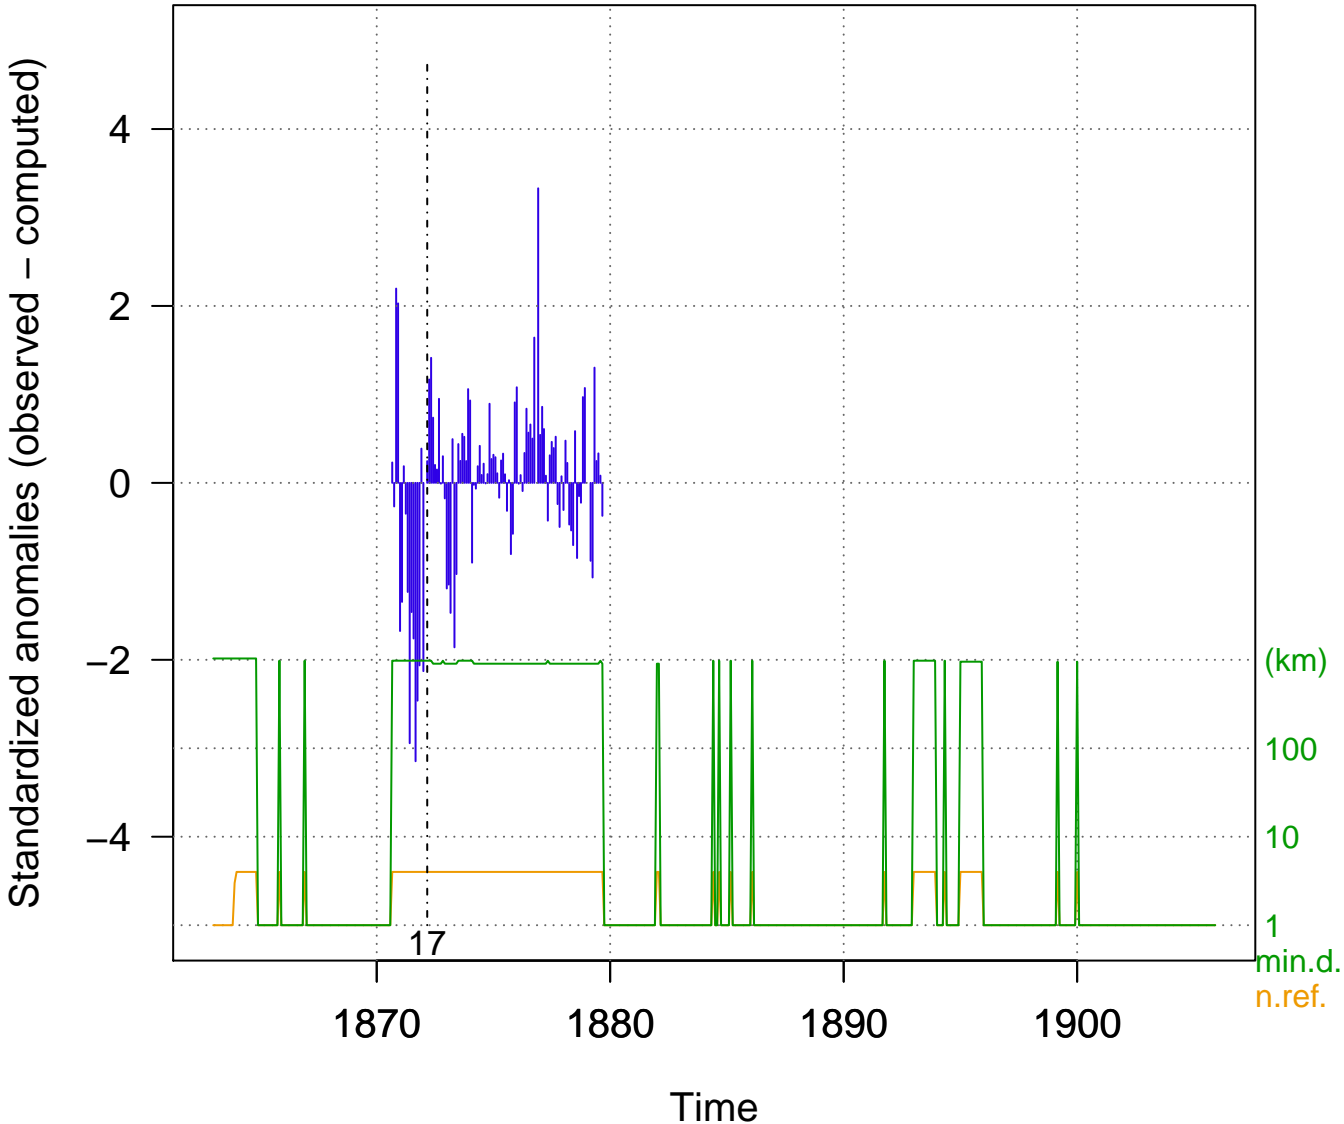

# O3 19 (S.\_Vicente) S. Vicente

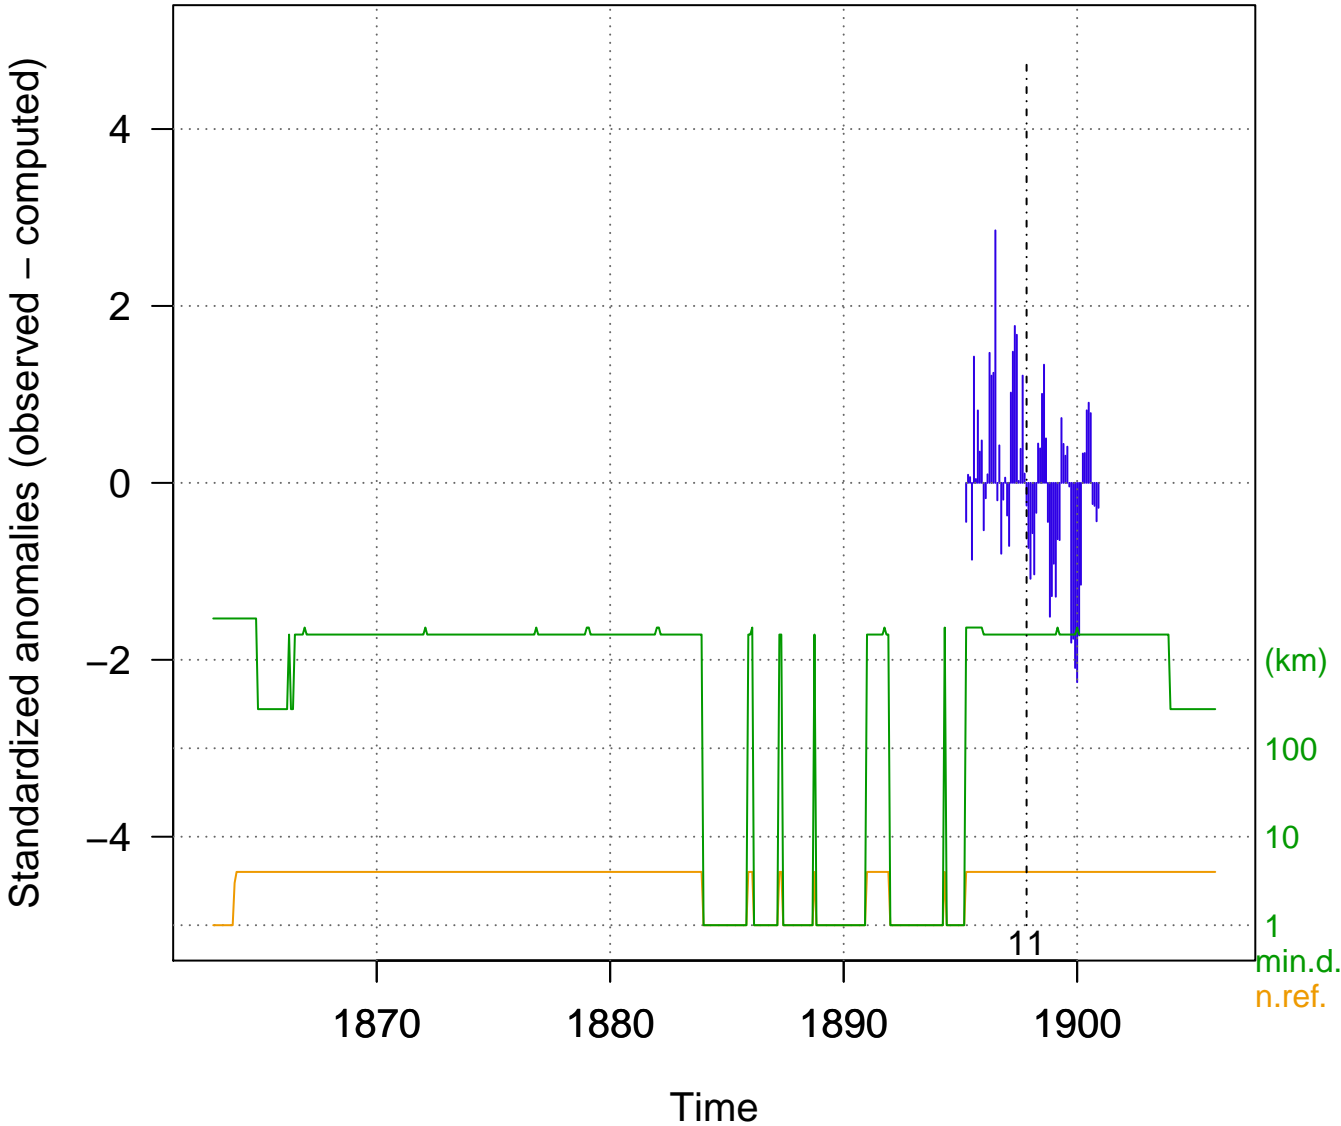



**O3 42 (S.\_Vicente-2)**  
**S. Vicente-2**

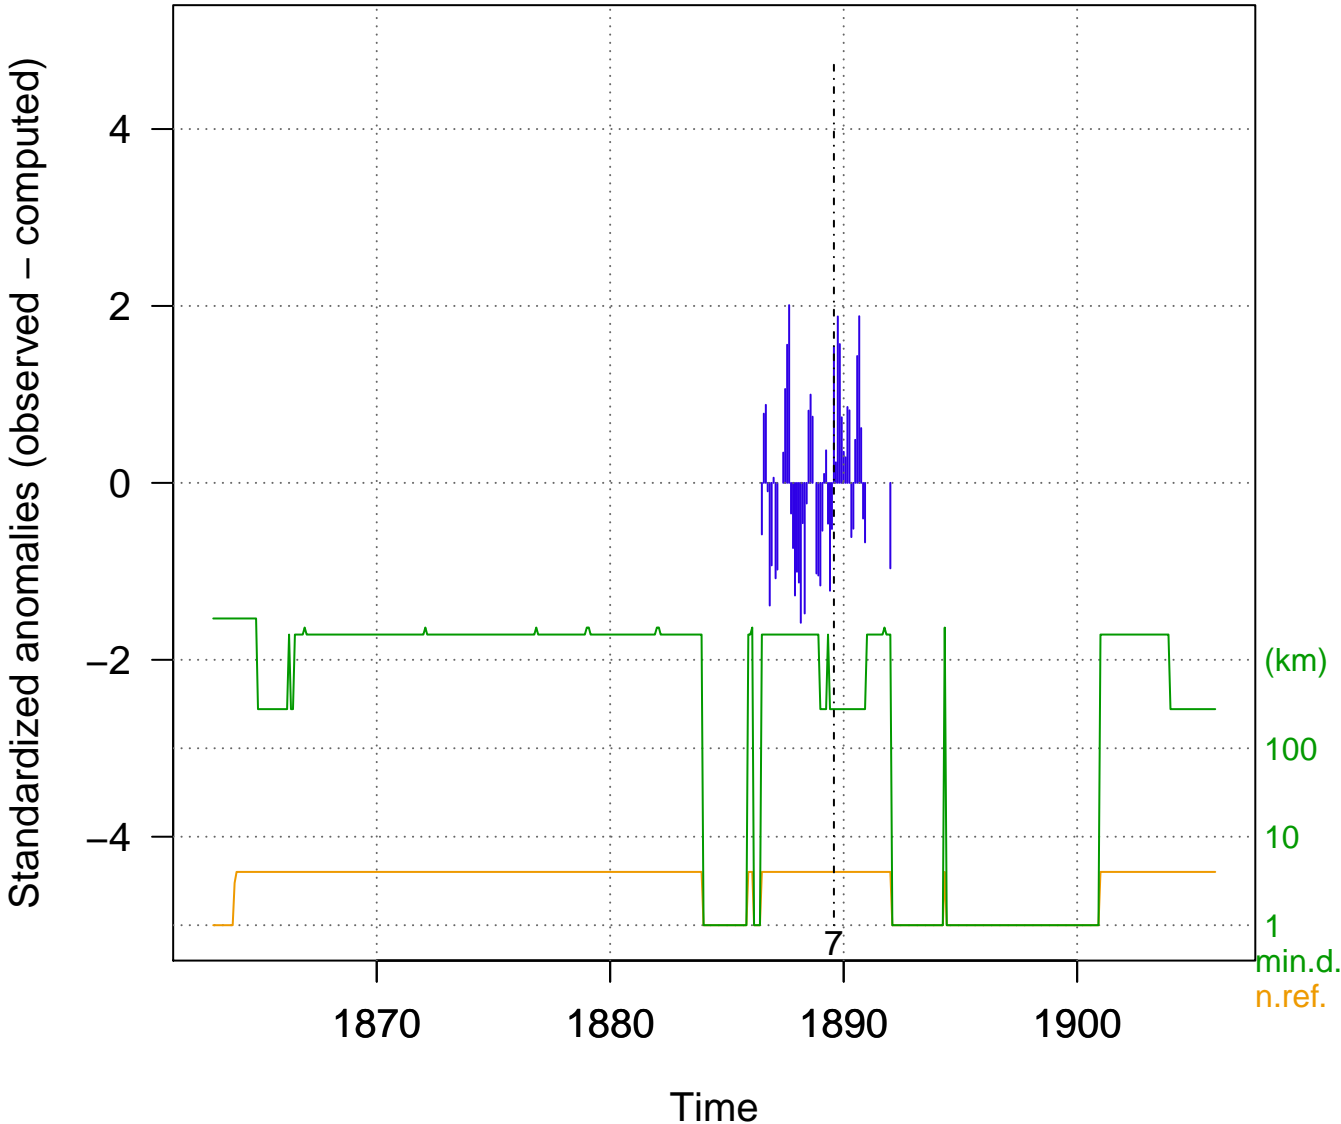

**O3 53 (S.\_Vicente-3)**  
**S. Vicente-3**

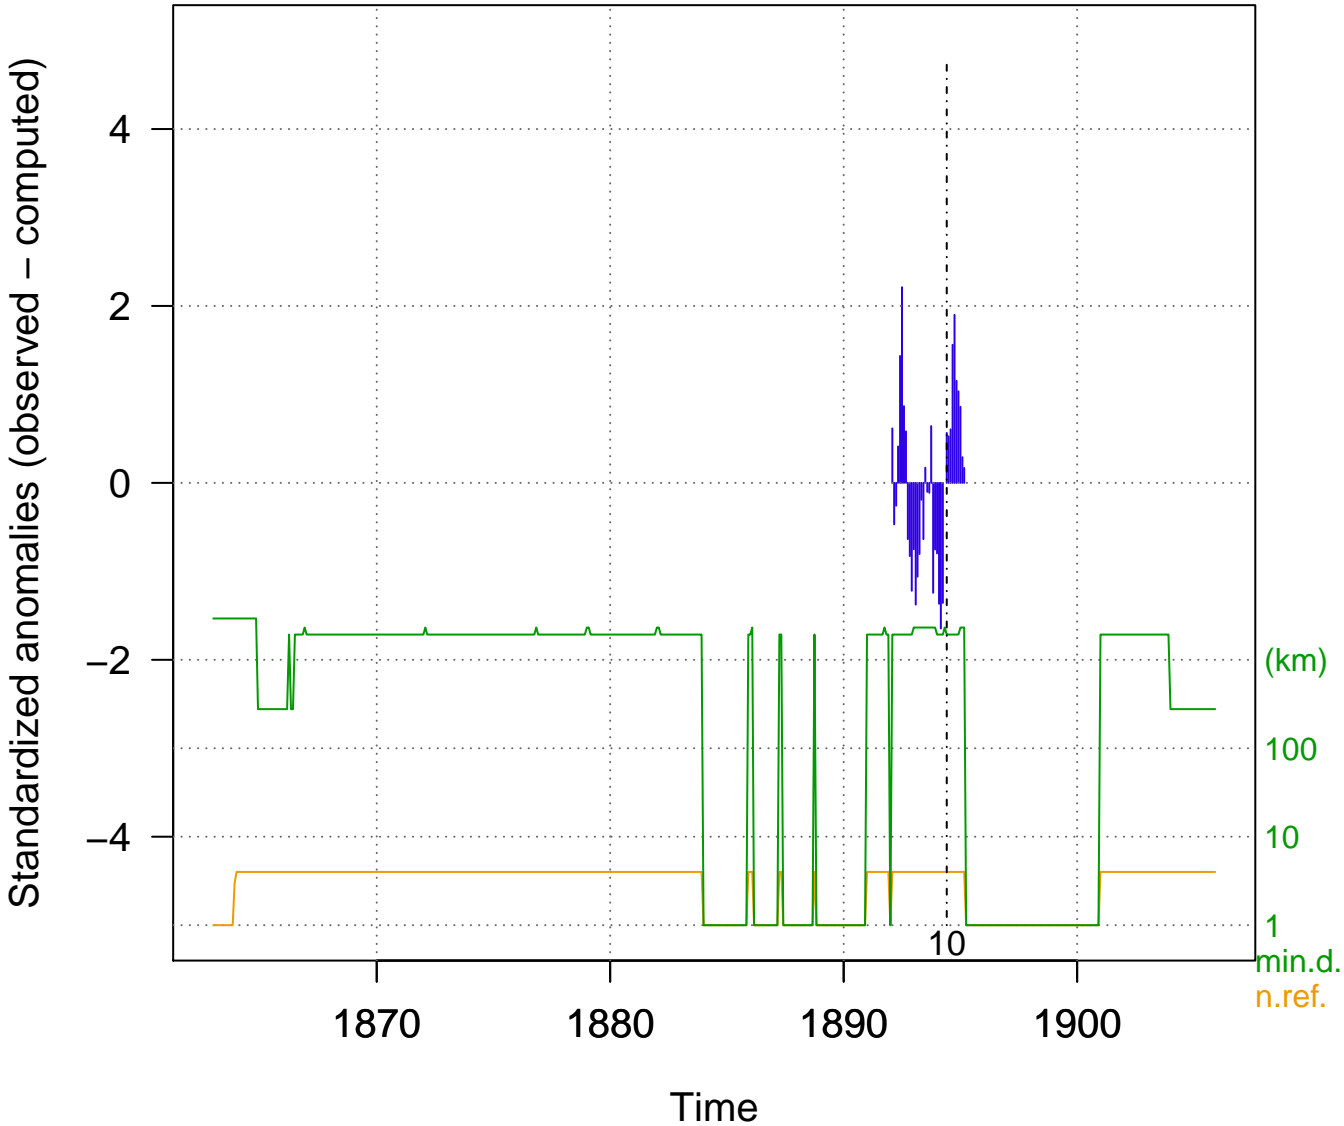

**O3 54 (S.\_Vicente-4)**  
**S. Vicente-4**

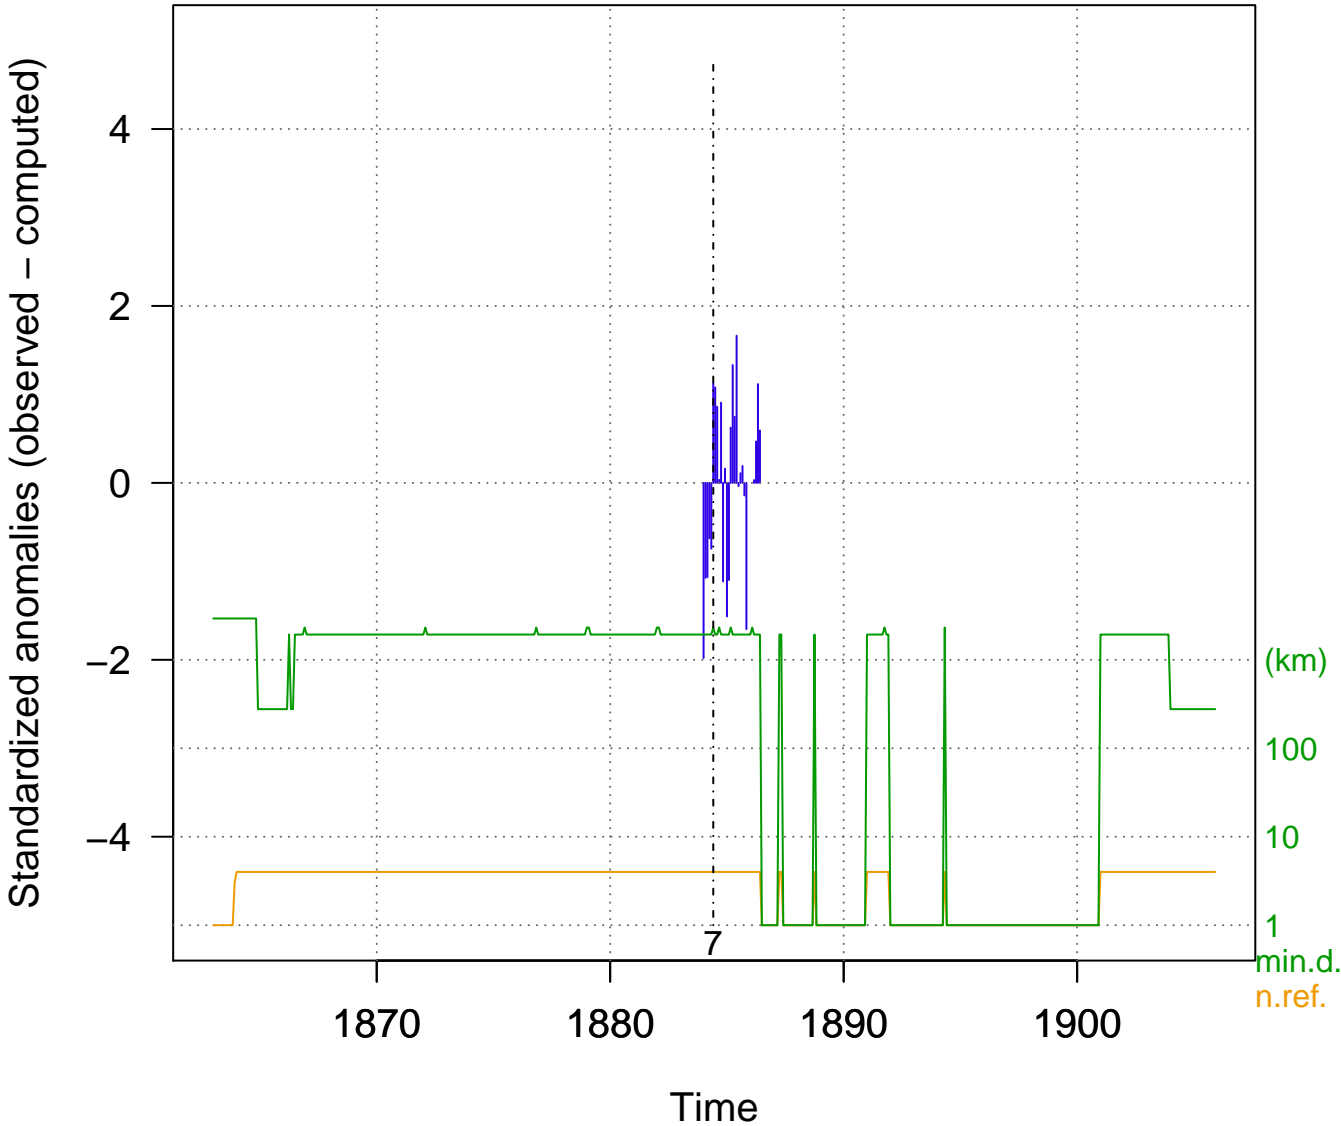

# O3 20 (Cidade\_da\_Praia) Cidade da Praia

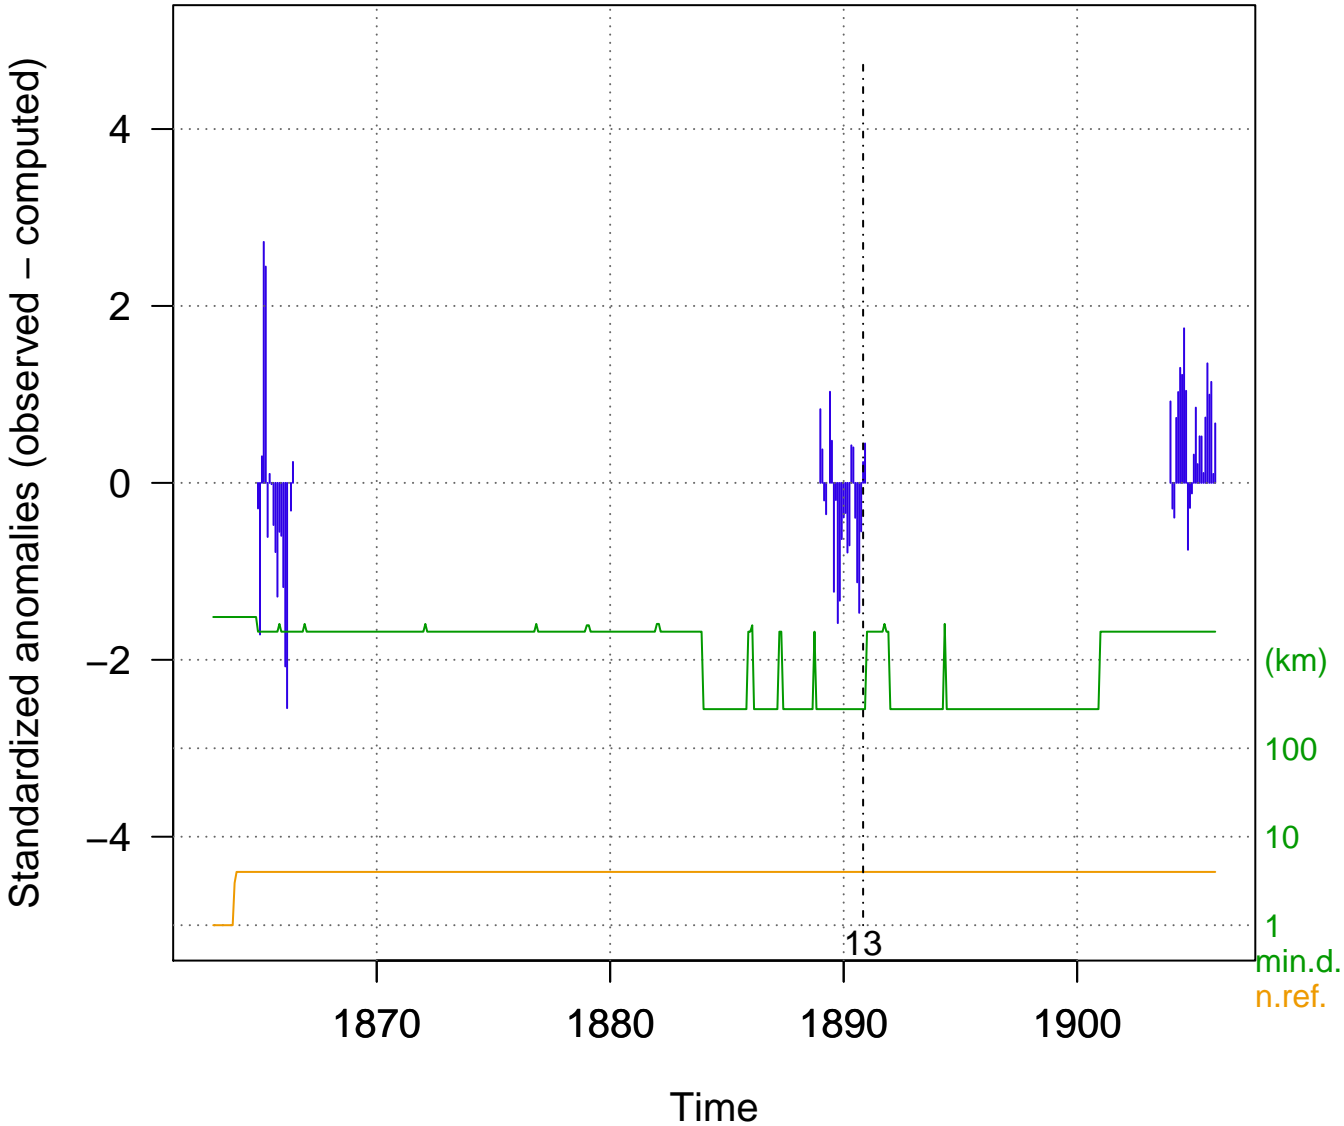

**O3 21 (S.\_Thome)**  
**S. Thome**

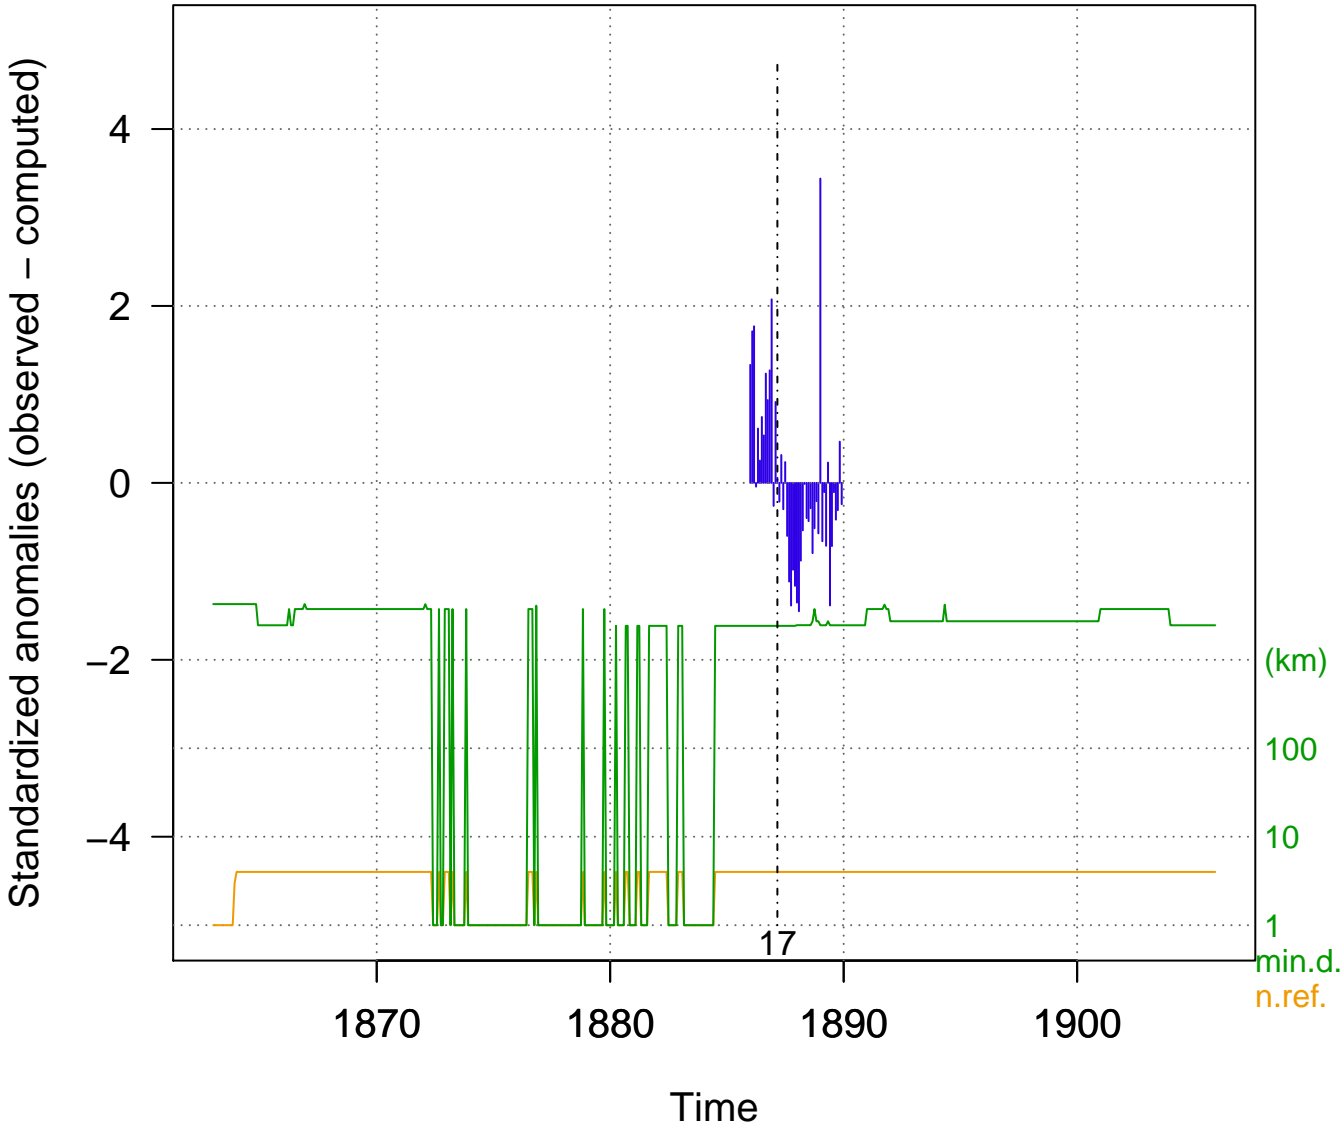

O3 30 (S.\_Thome-2)  
S. Thome-2

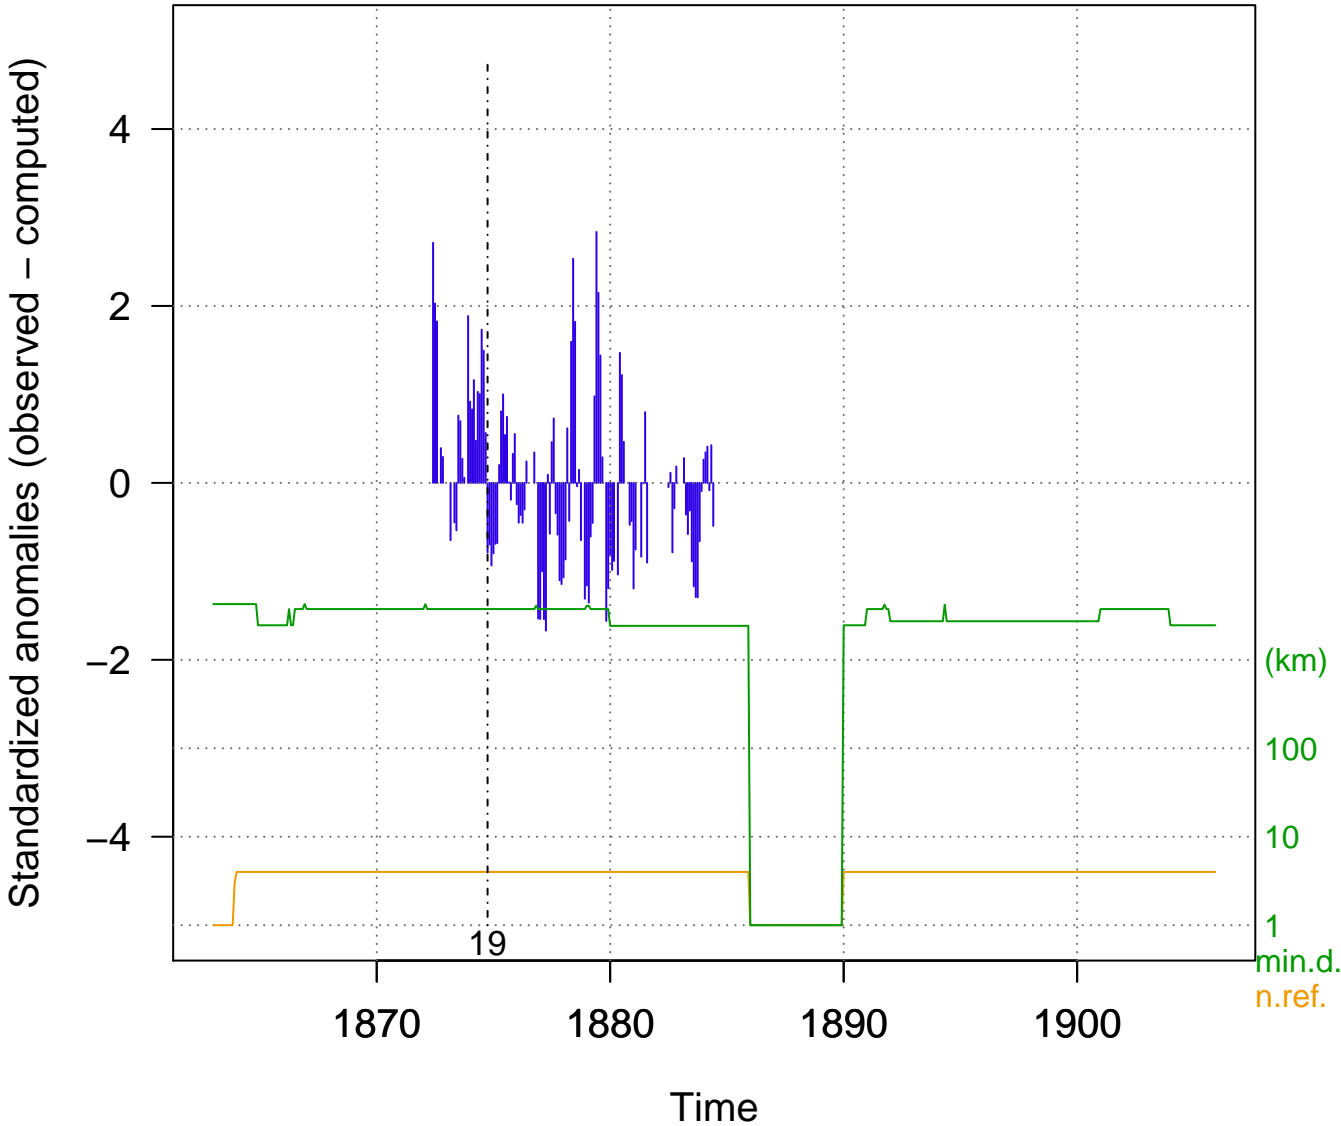

# O3 22 (S.\_Salvador\_do\_Congo)

## S. Salvador do Congo

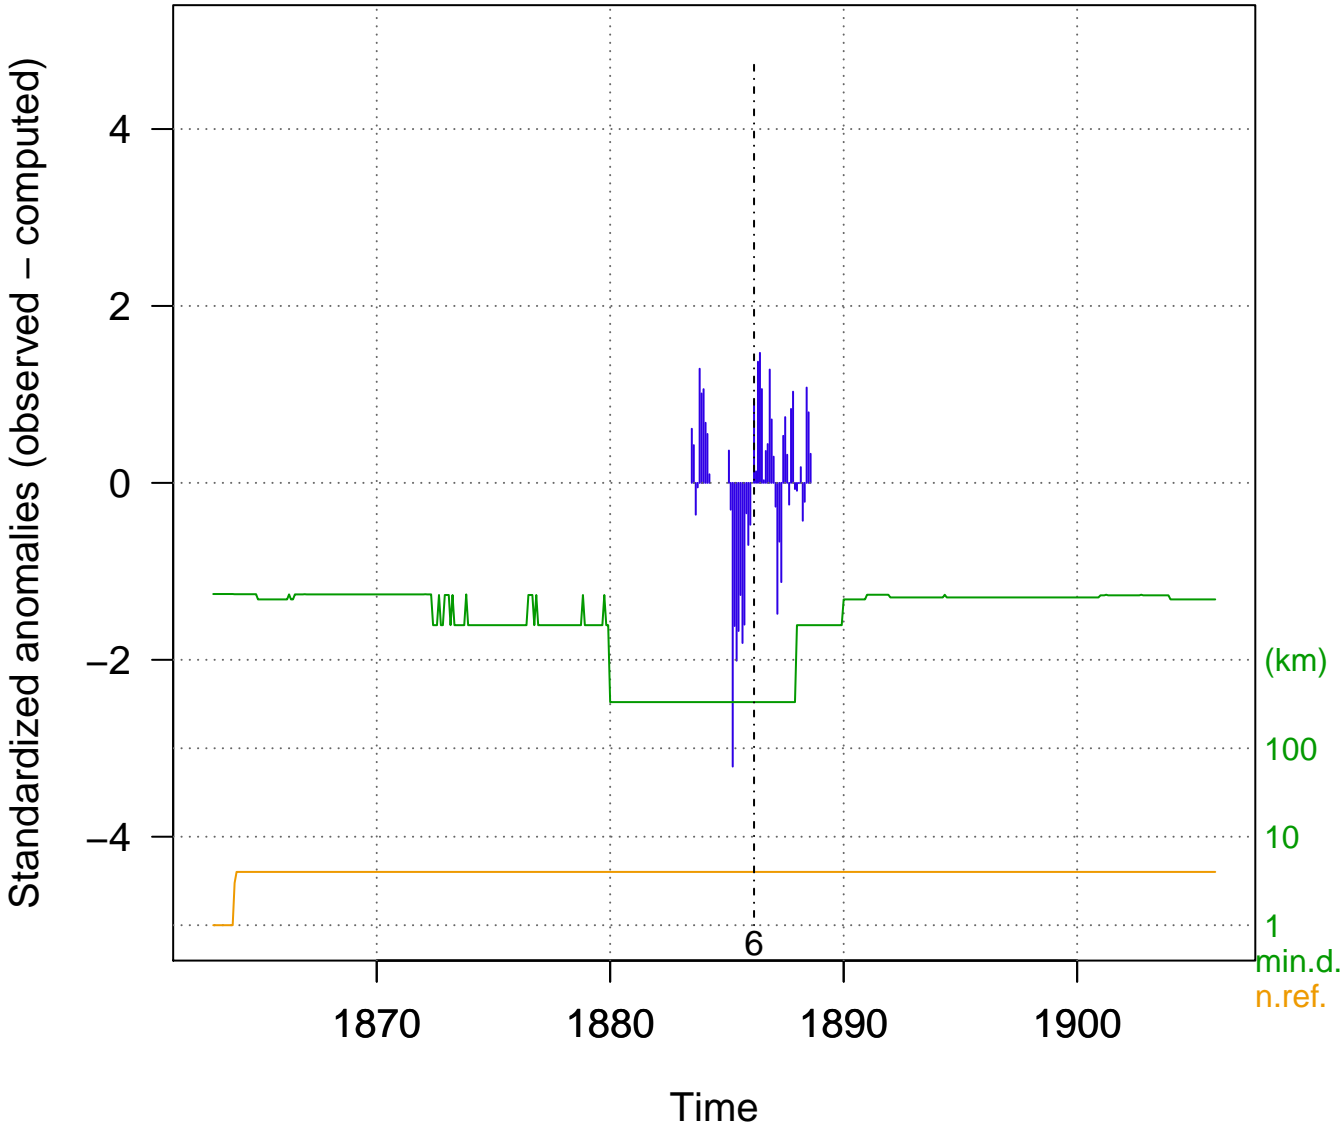

# O3 23 (Loanda) Loanda

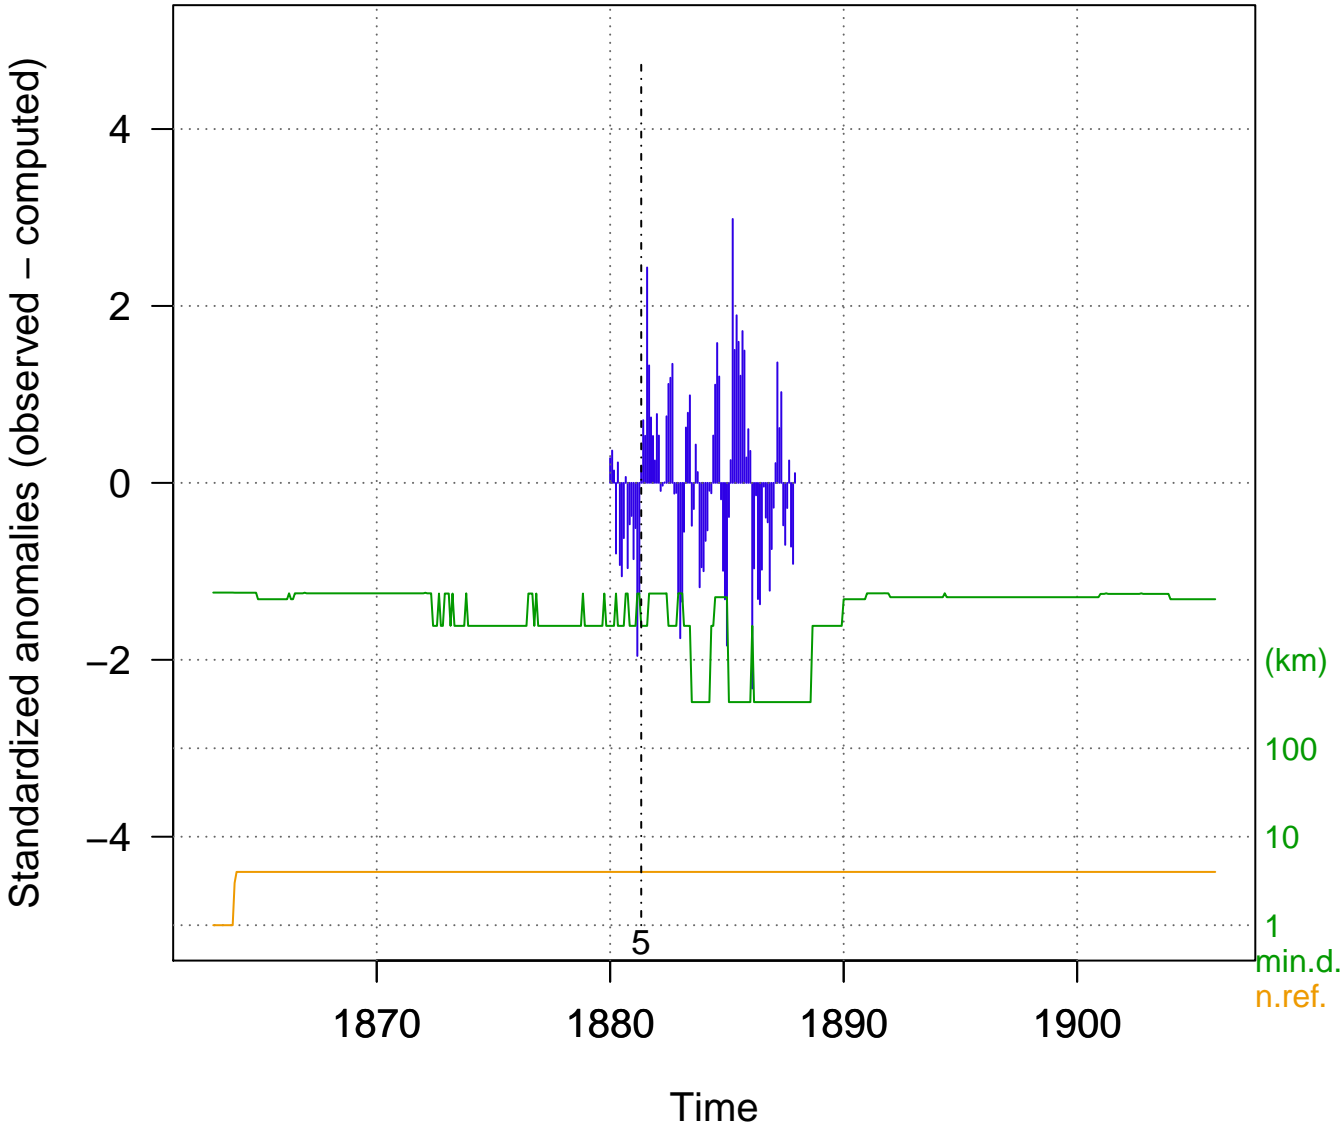



# Final graphics

Adjusted series and  
applied corrections

# O3 1 (Montalegre) Montalegre

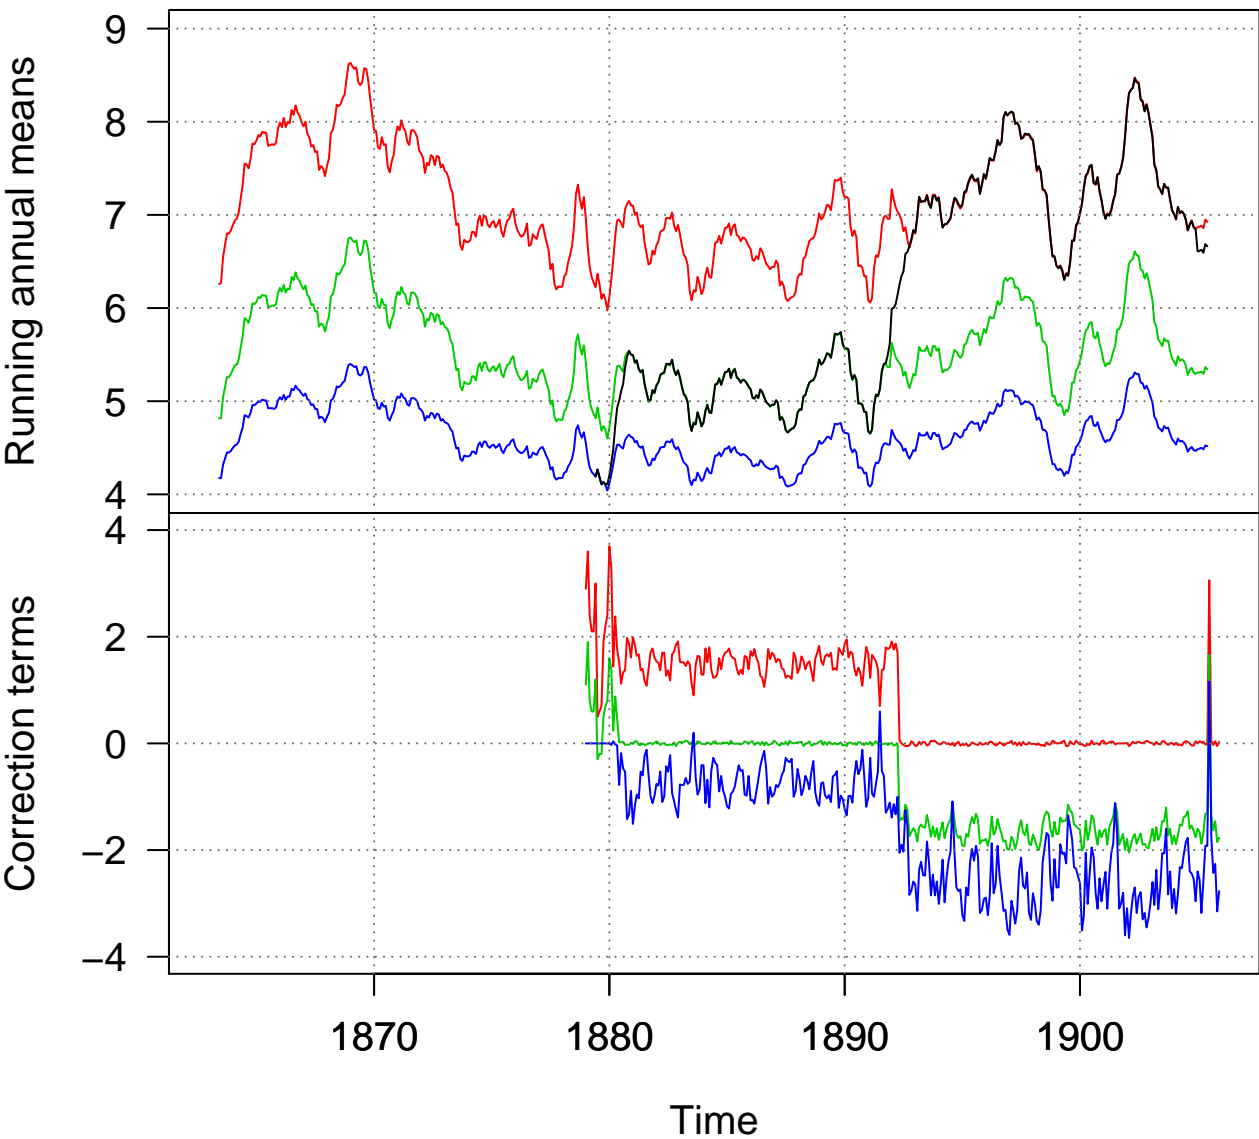

# O3 2 (Moncorvo) Moncorvo

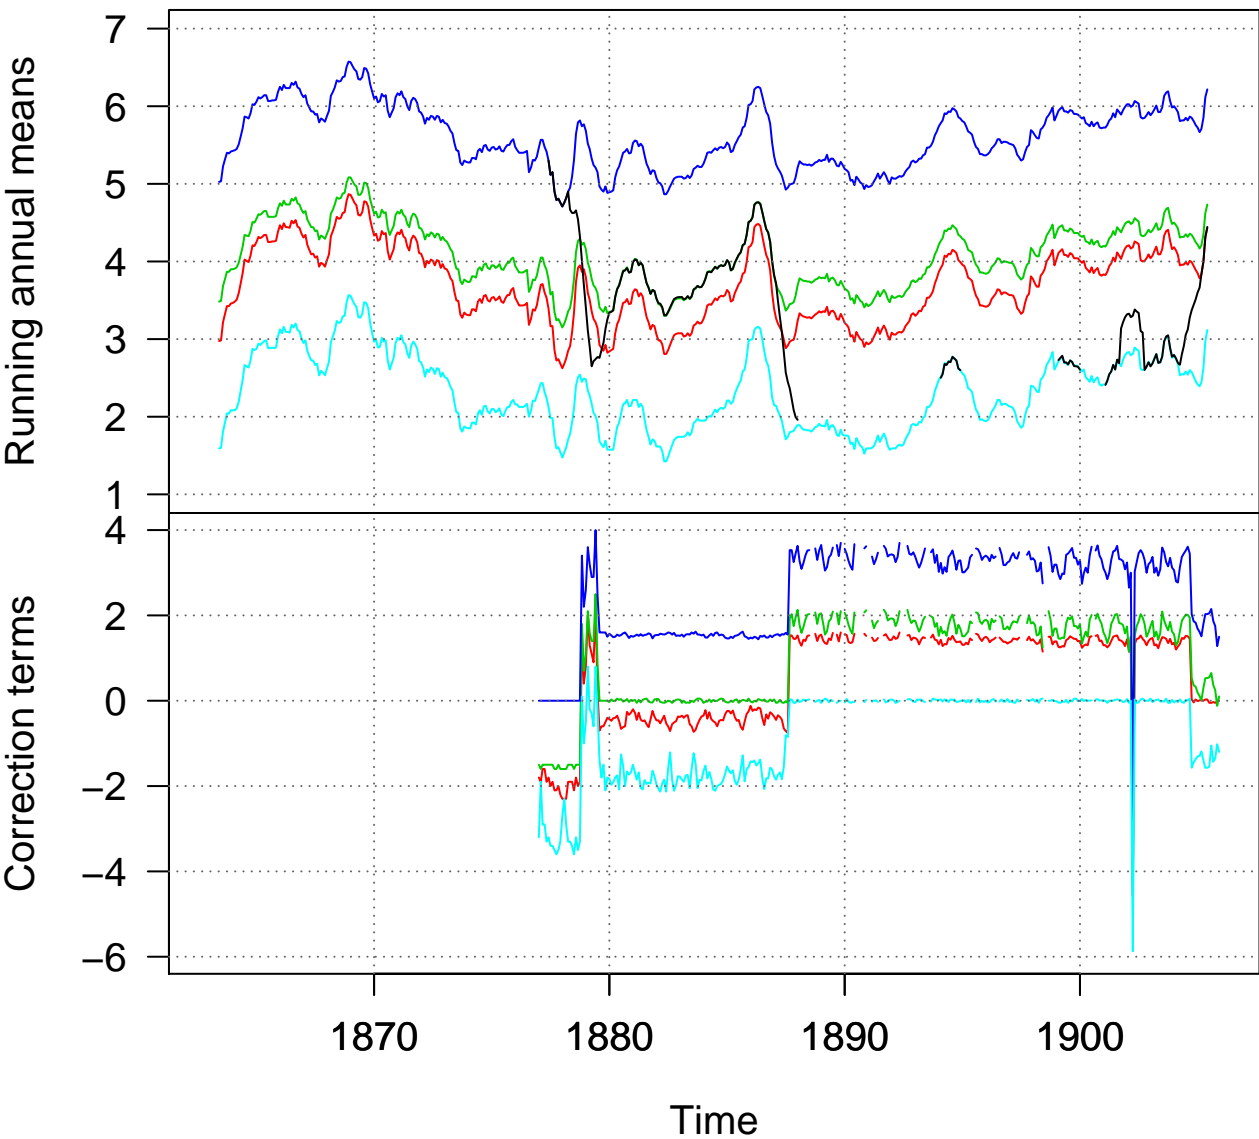

# O3 3 (Porto) Porto

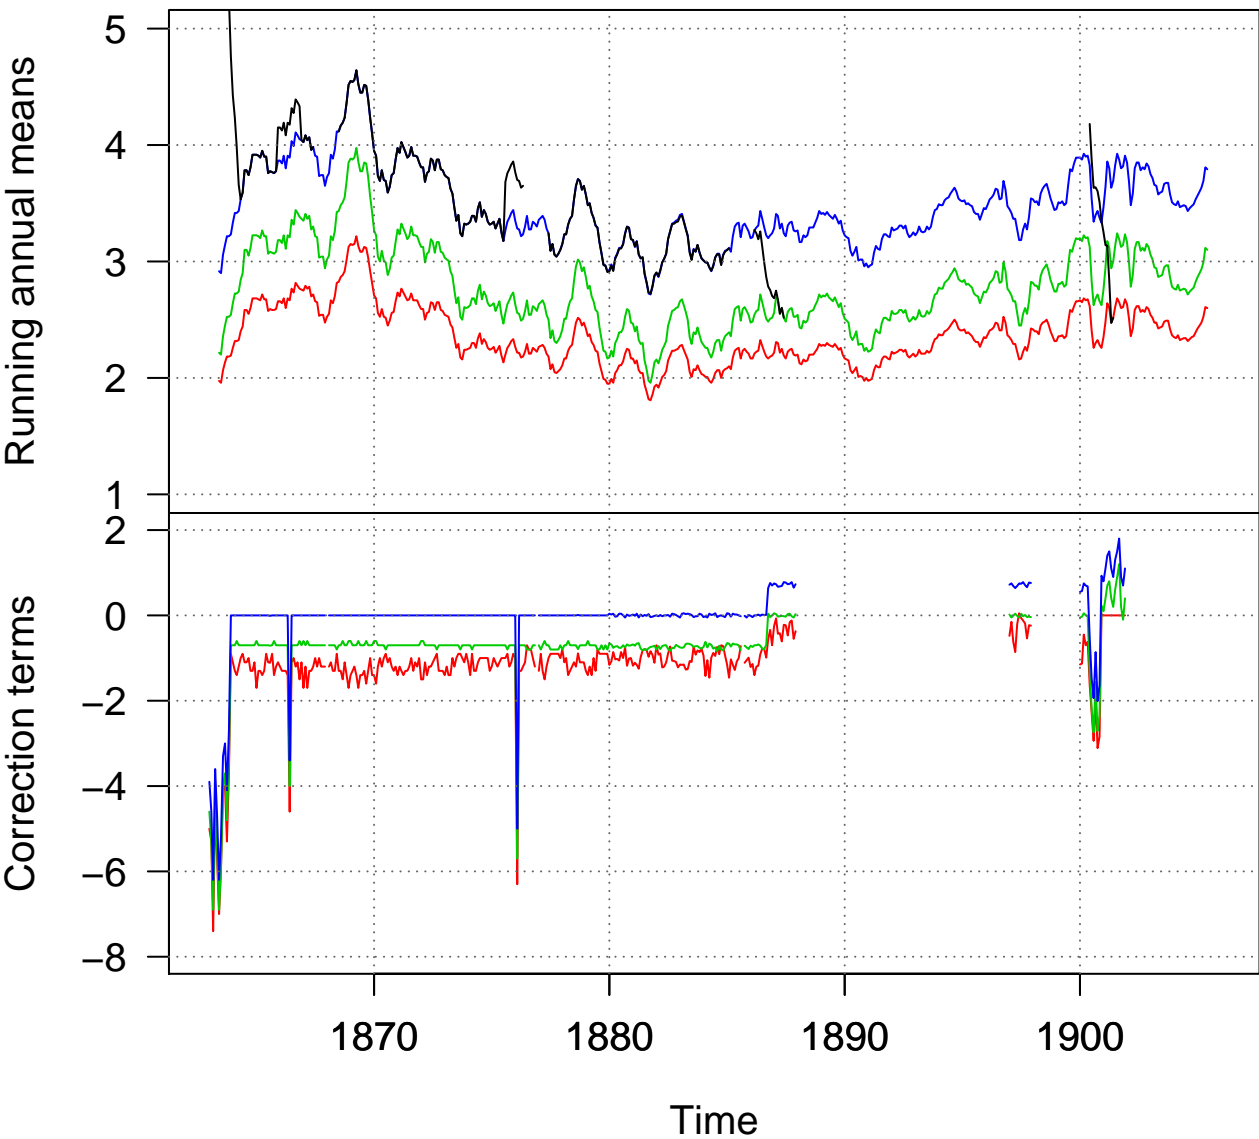

O3 4 (Vizeu)

Vizeu

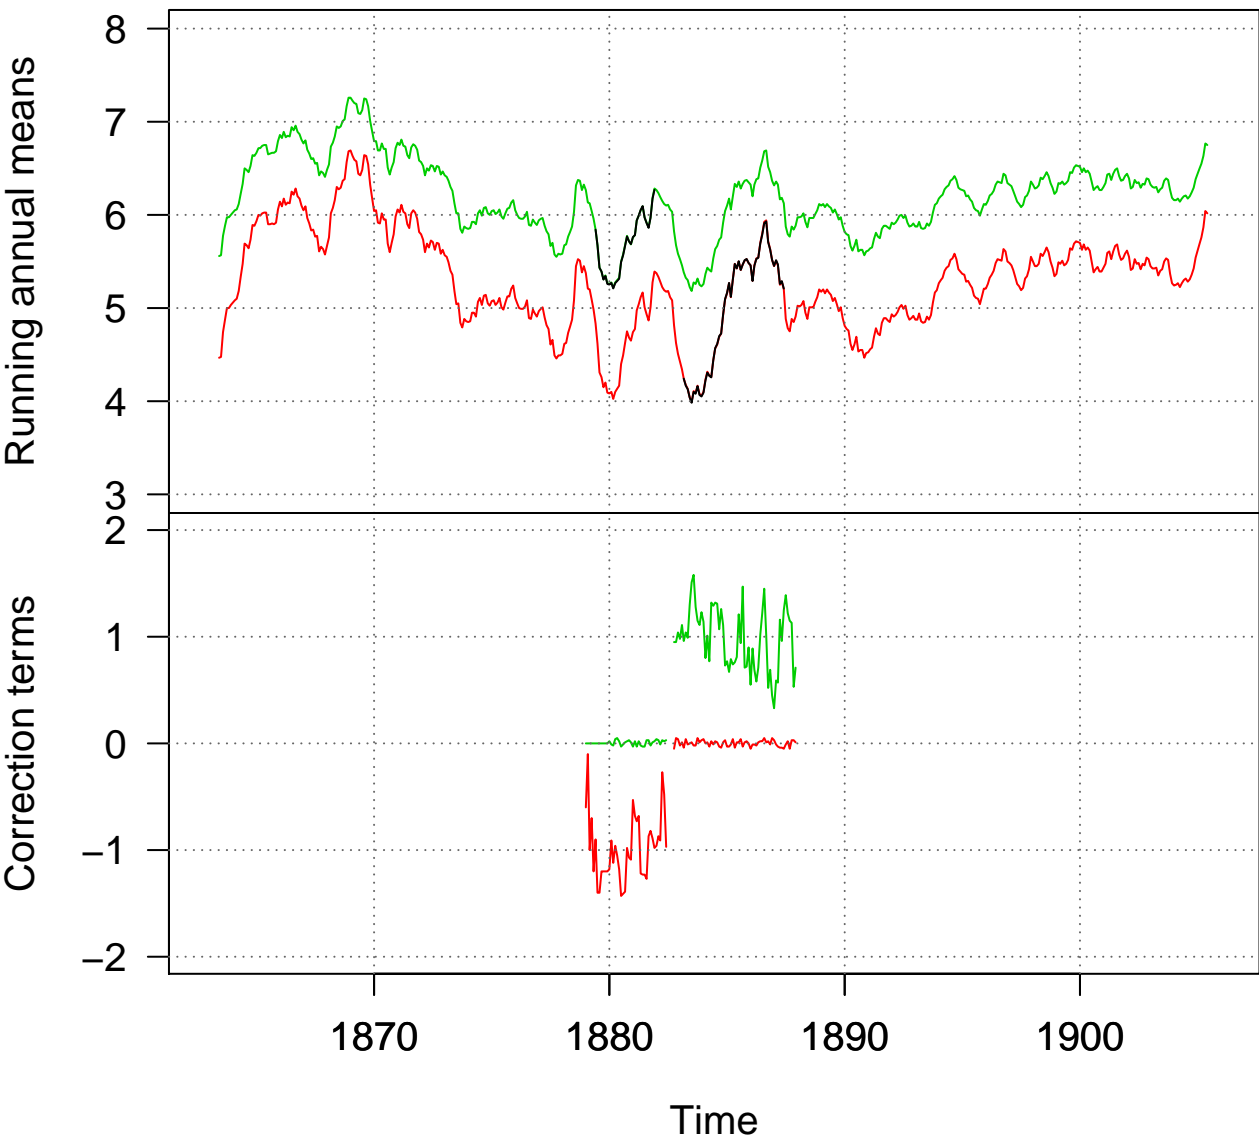

# O3 5 (Guarda) Guarda

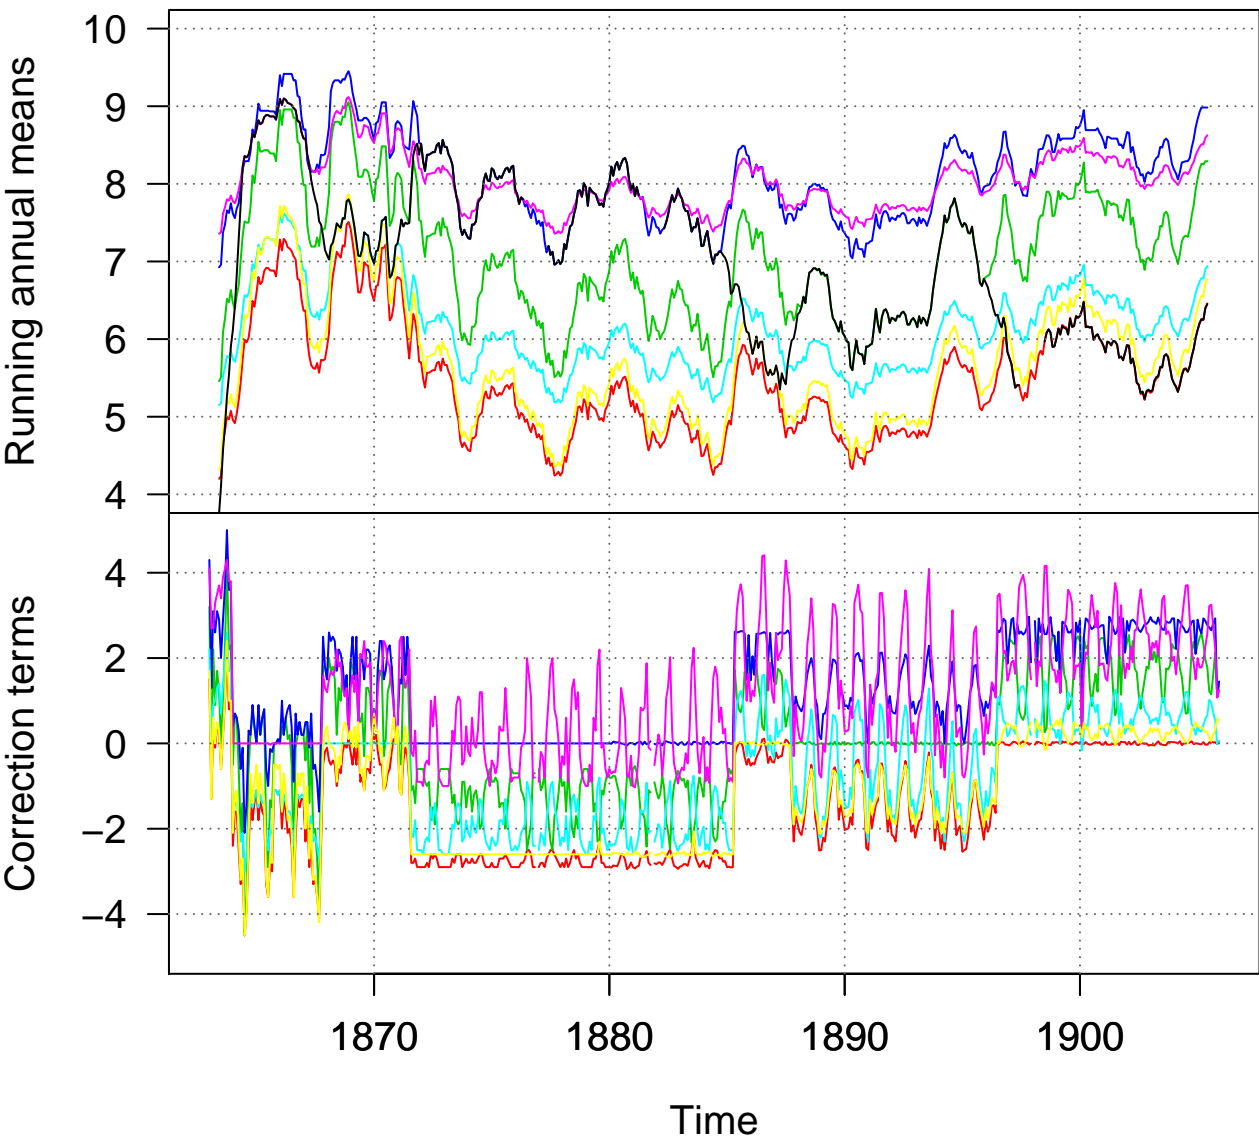

# O3 6 (Serra\_da\_Estrella)

## Serra da Estrella

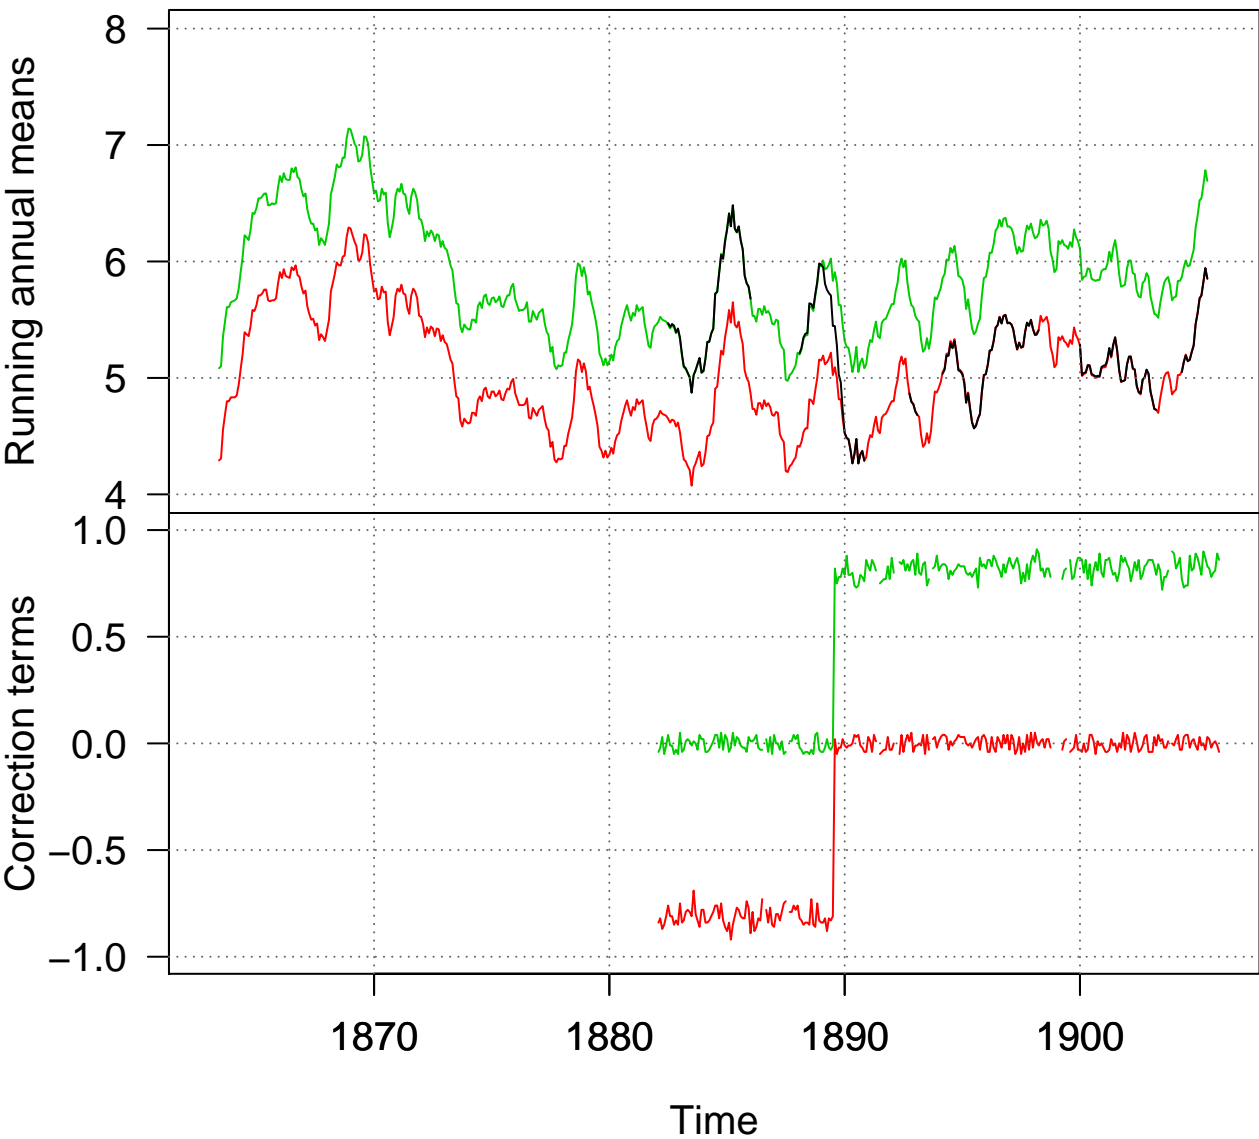

**O3 7 (S.\_Fiel)**  
**S. Fiel**

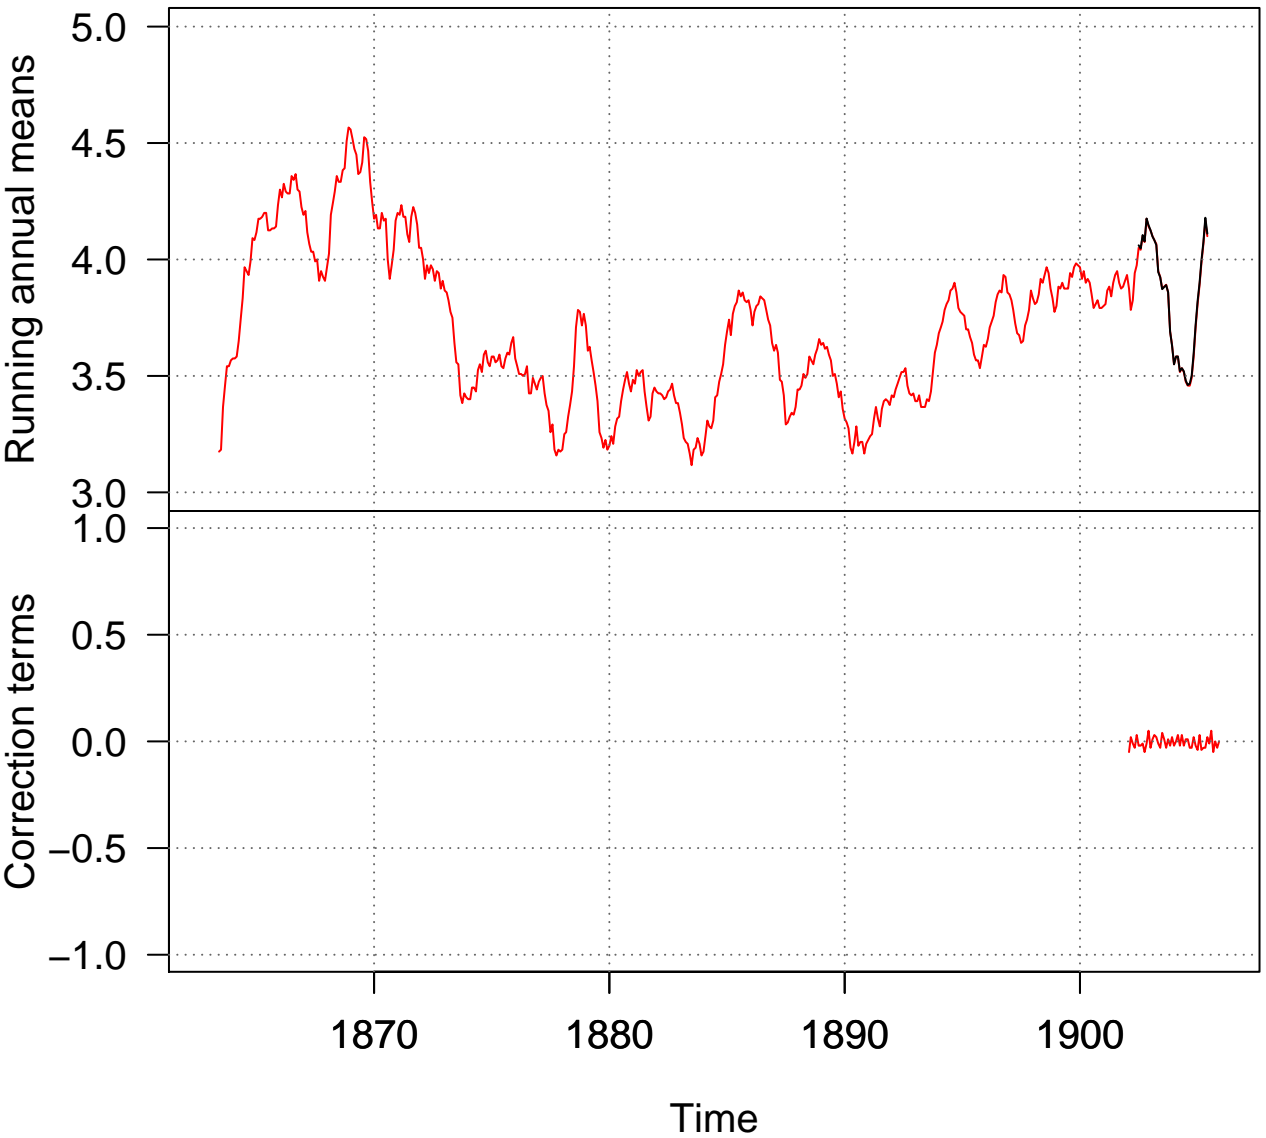



# O3 8 (Alcanhoes) Alcanhoes

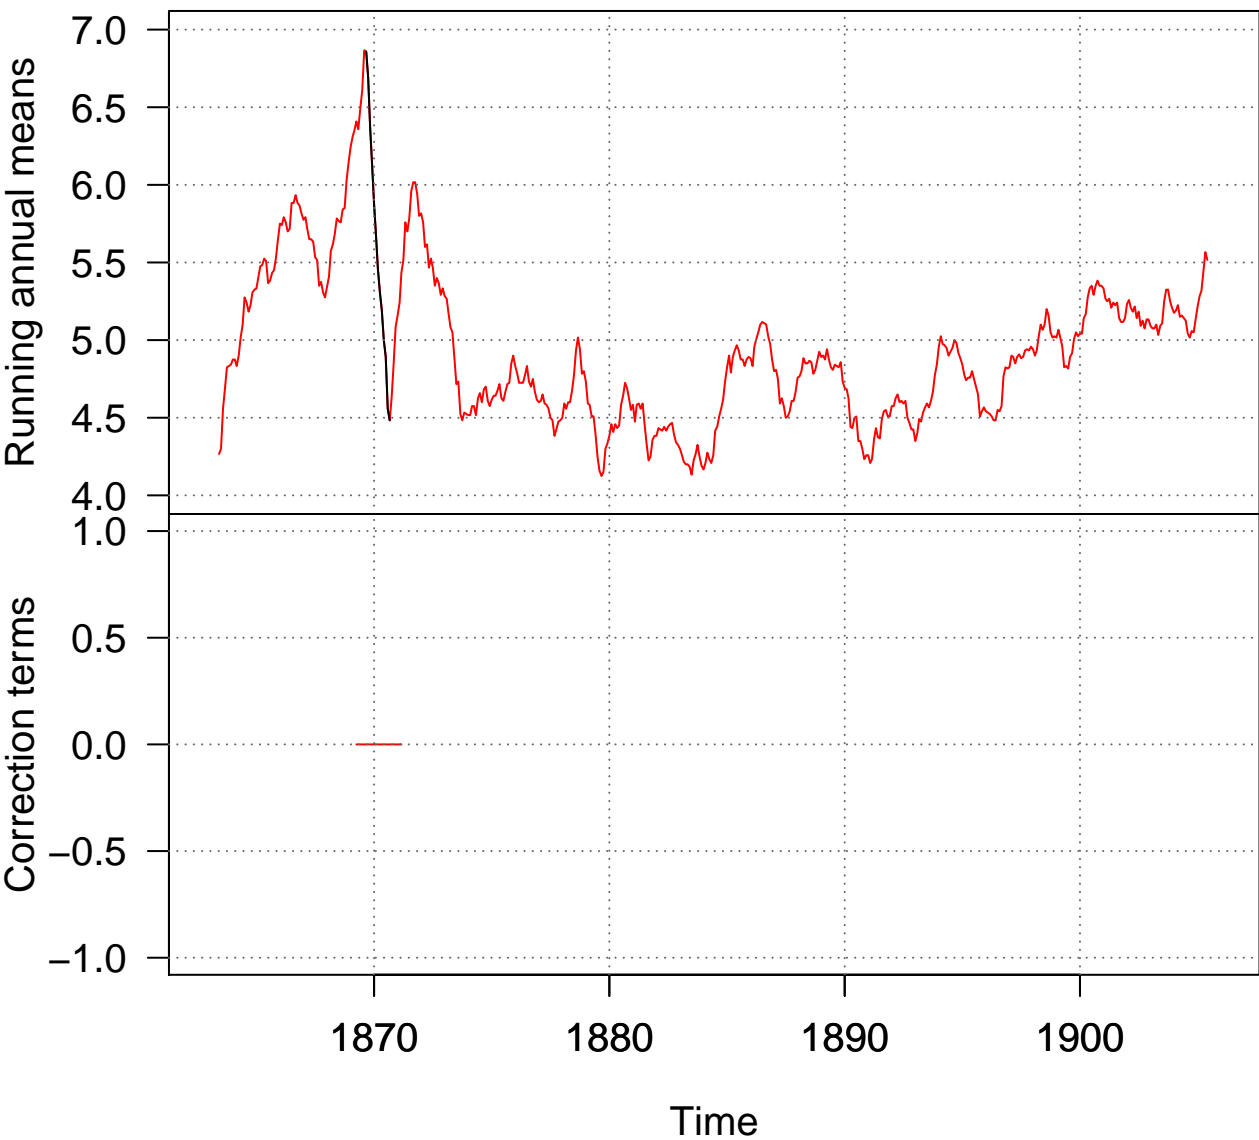

# O3 9 (Campo\_Maior) Campo Maior

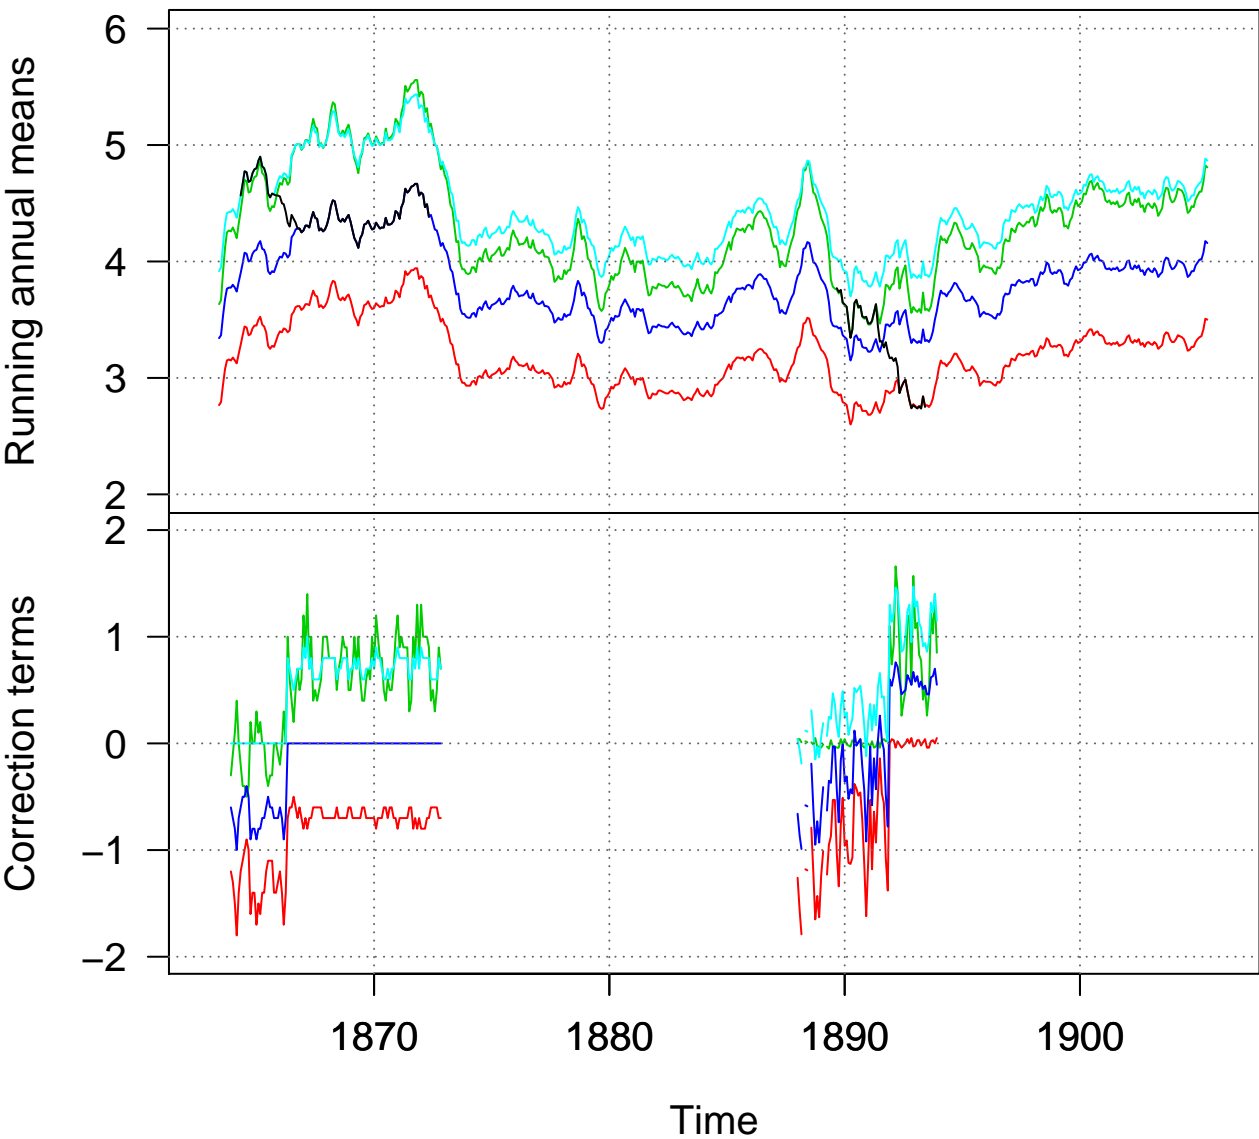

**O3 10 (Infante\_D\_Luiz)**  
**Lisbon Infante D. Luiz**

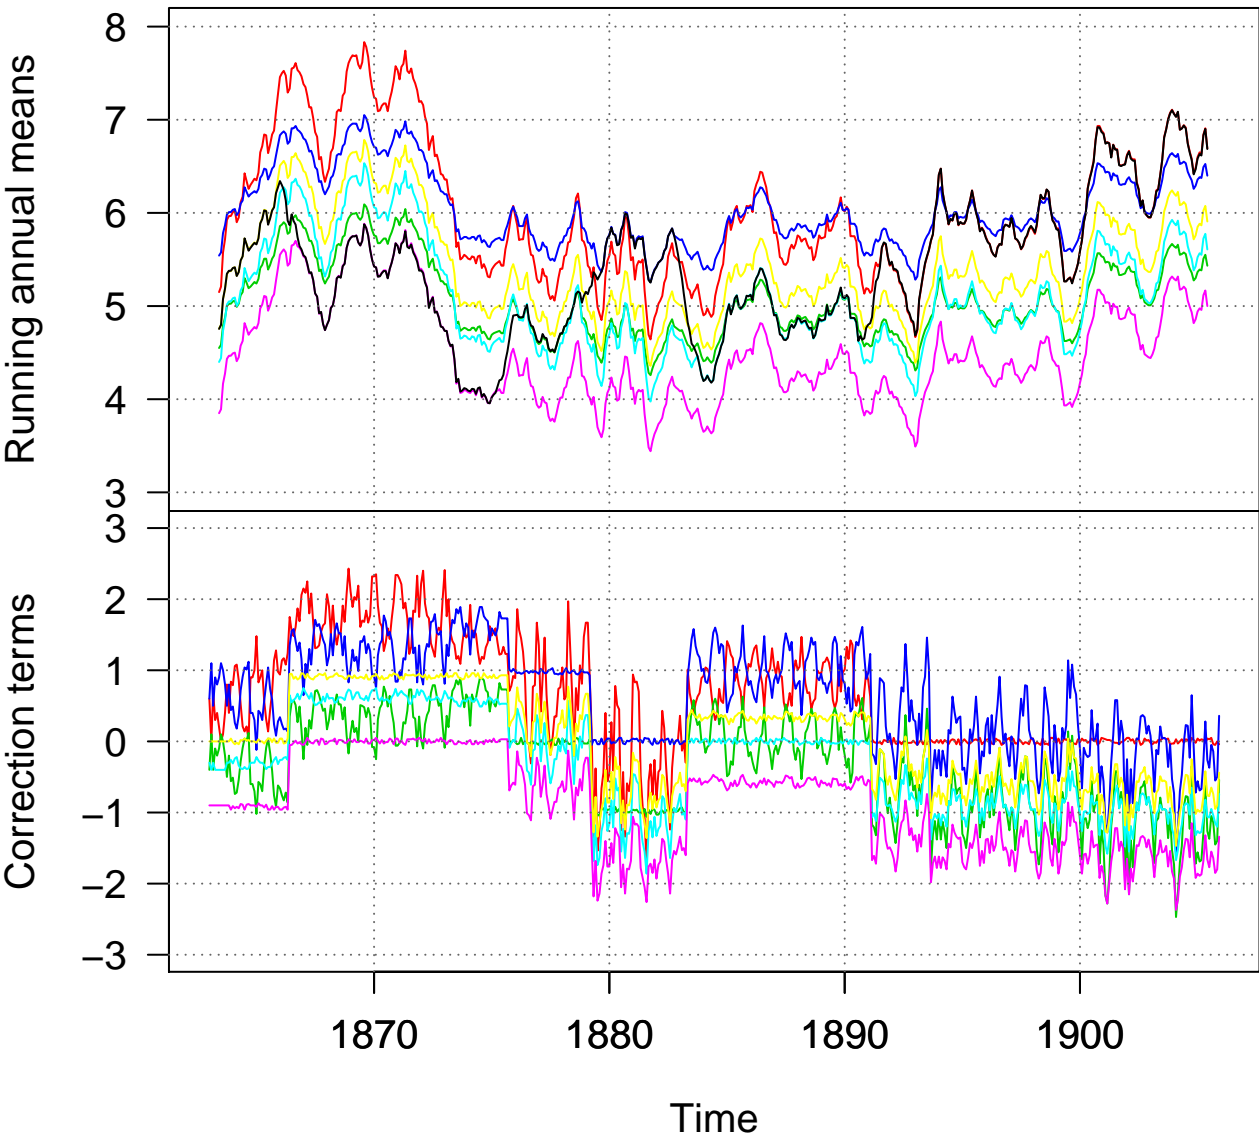

# O3 11 (Angra\_do\_Heroismo)

## Angra do Heroismo

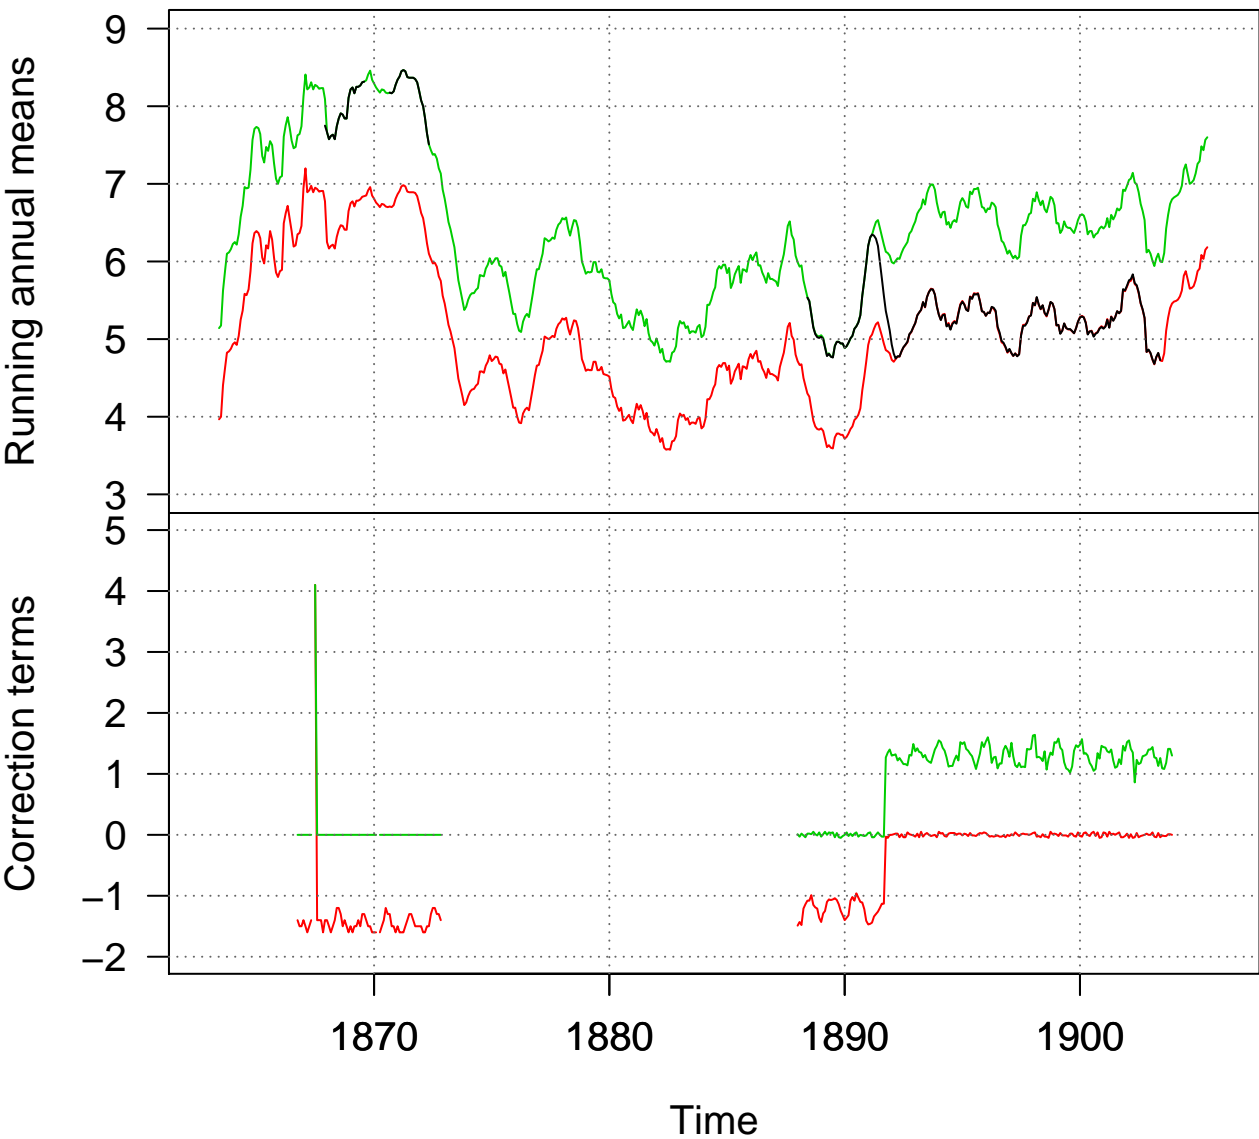

# O3 12 (Evora) Evora

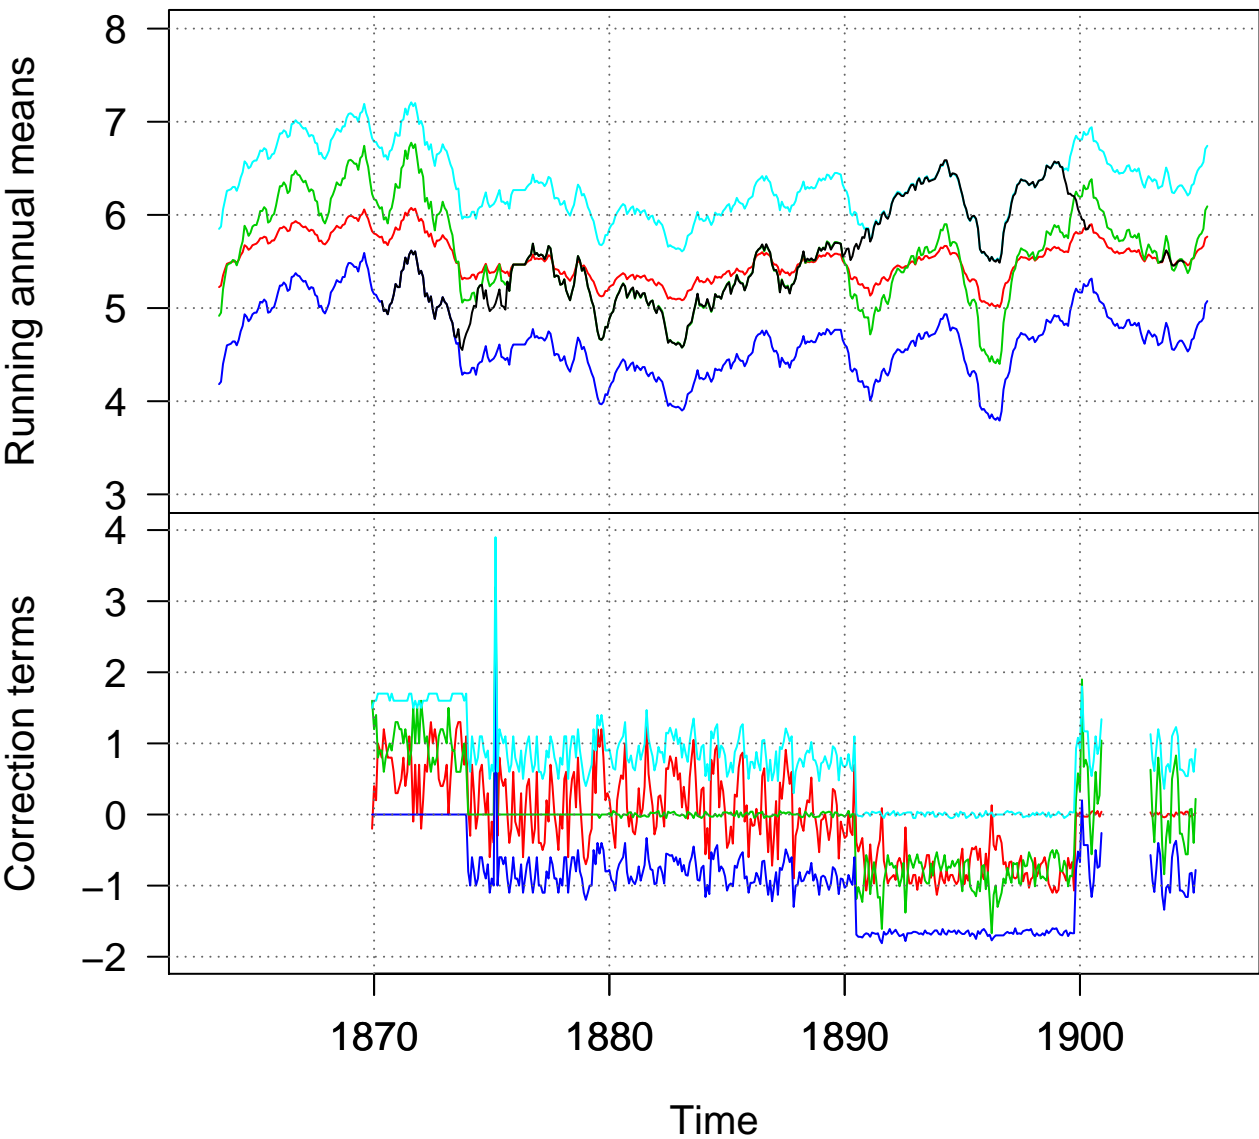

# O3 13 (Villa\_Fernando)

## Villa Fernando

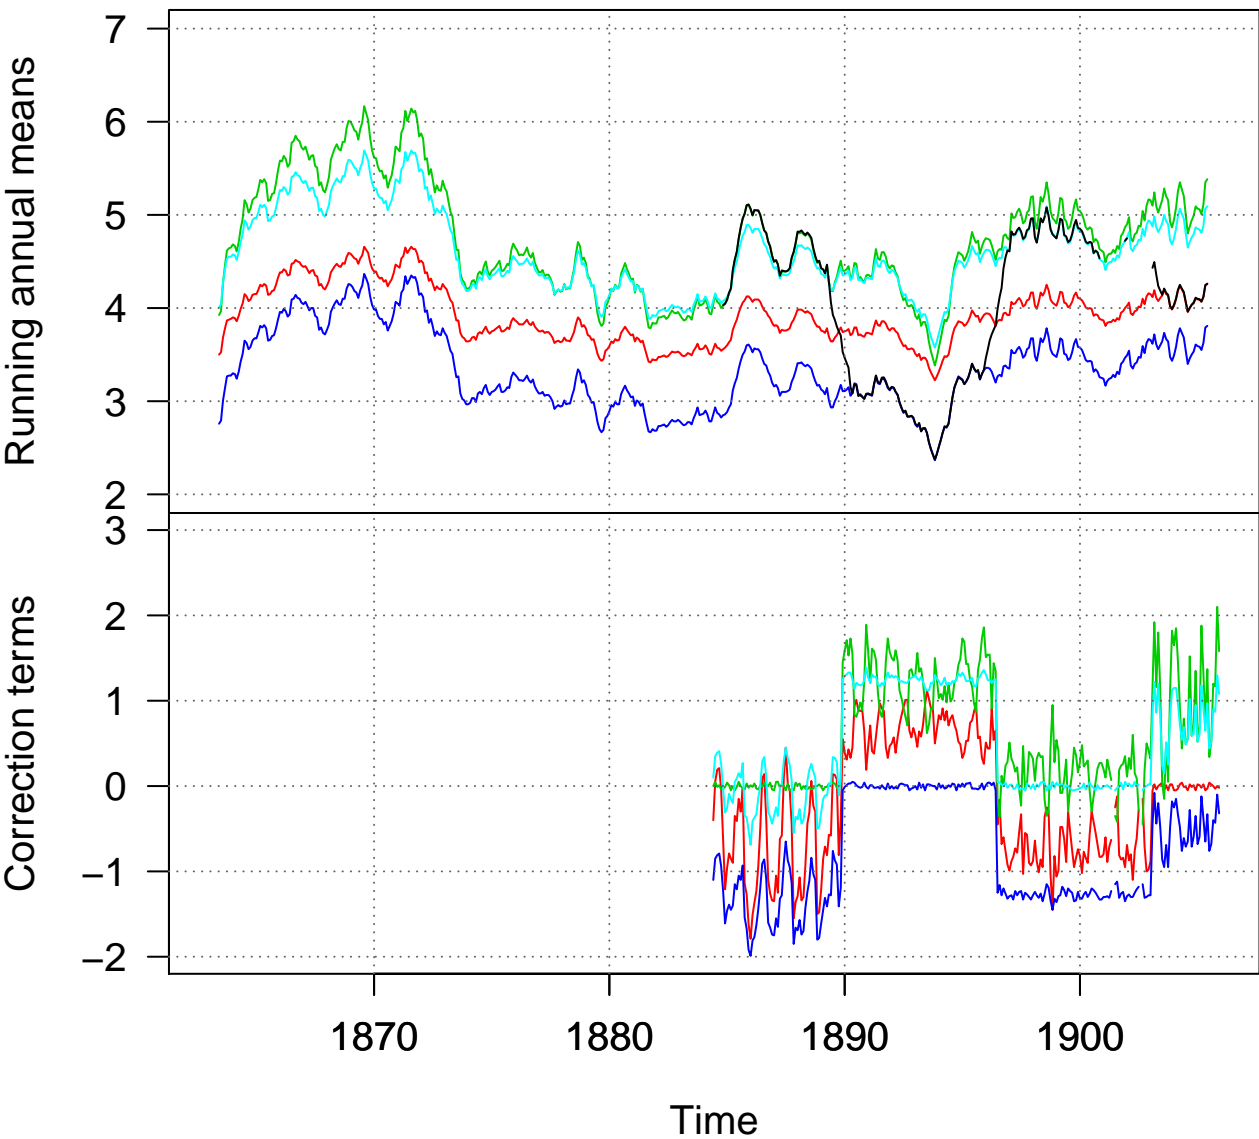

# O3 14 (Beja) Beja

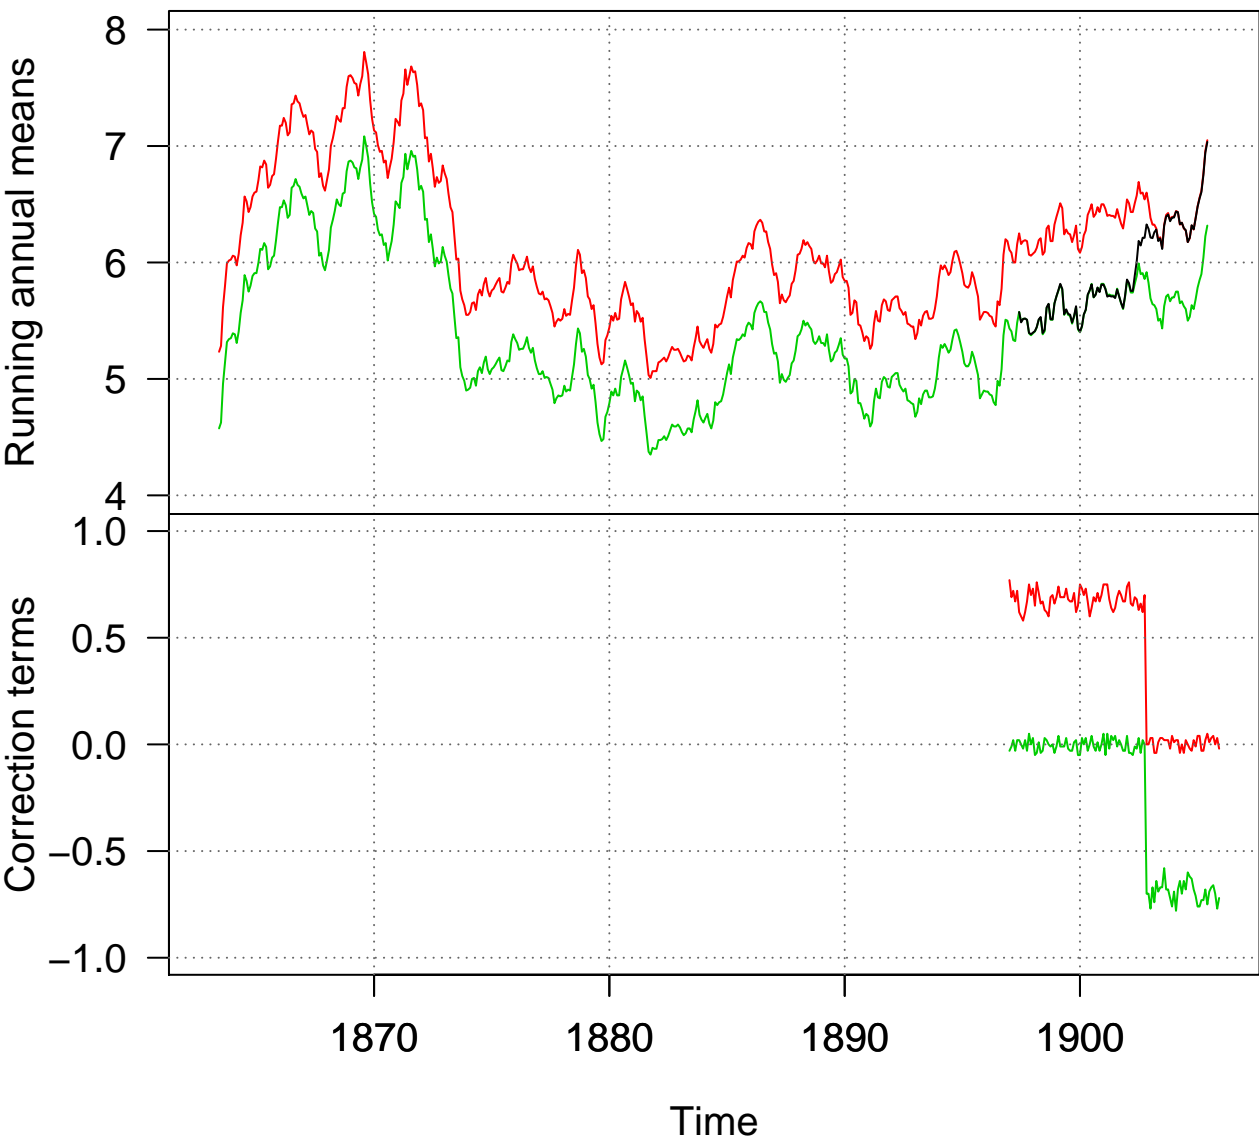

# O3 15 (Ponta\_Delgada)

## Ponta Delgada

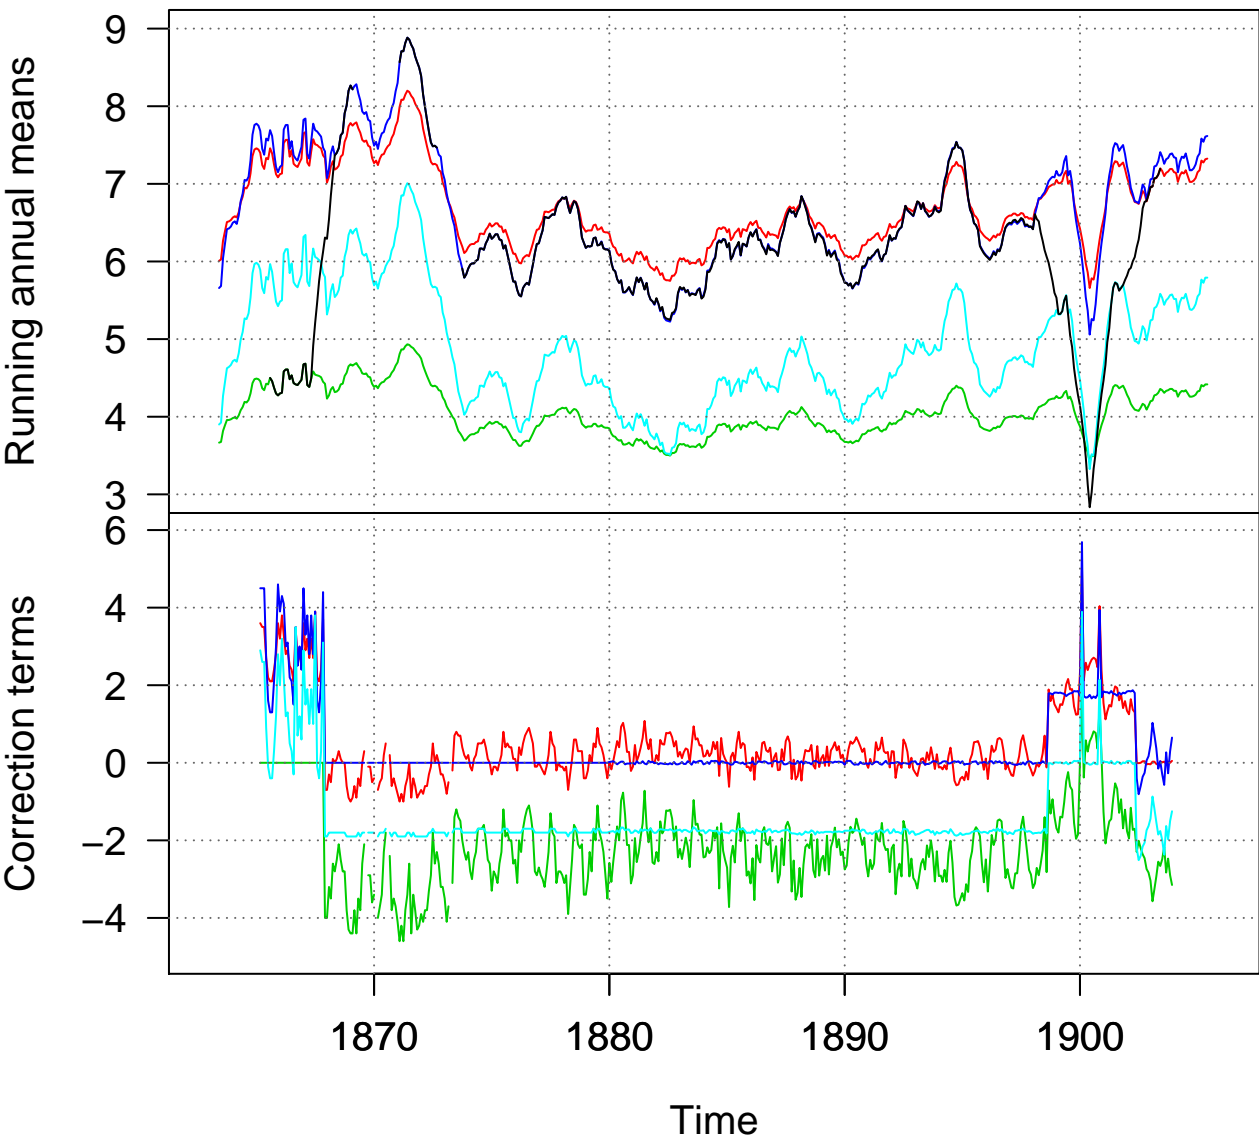



# O3 16 (Lagos) Lagos

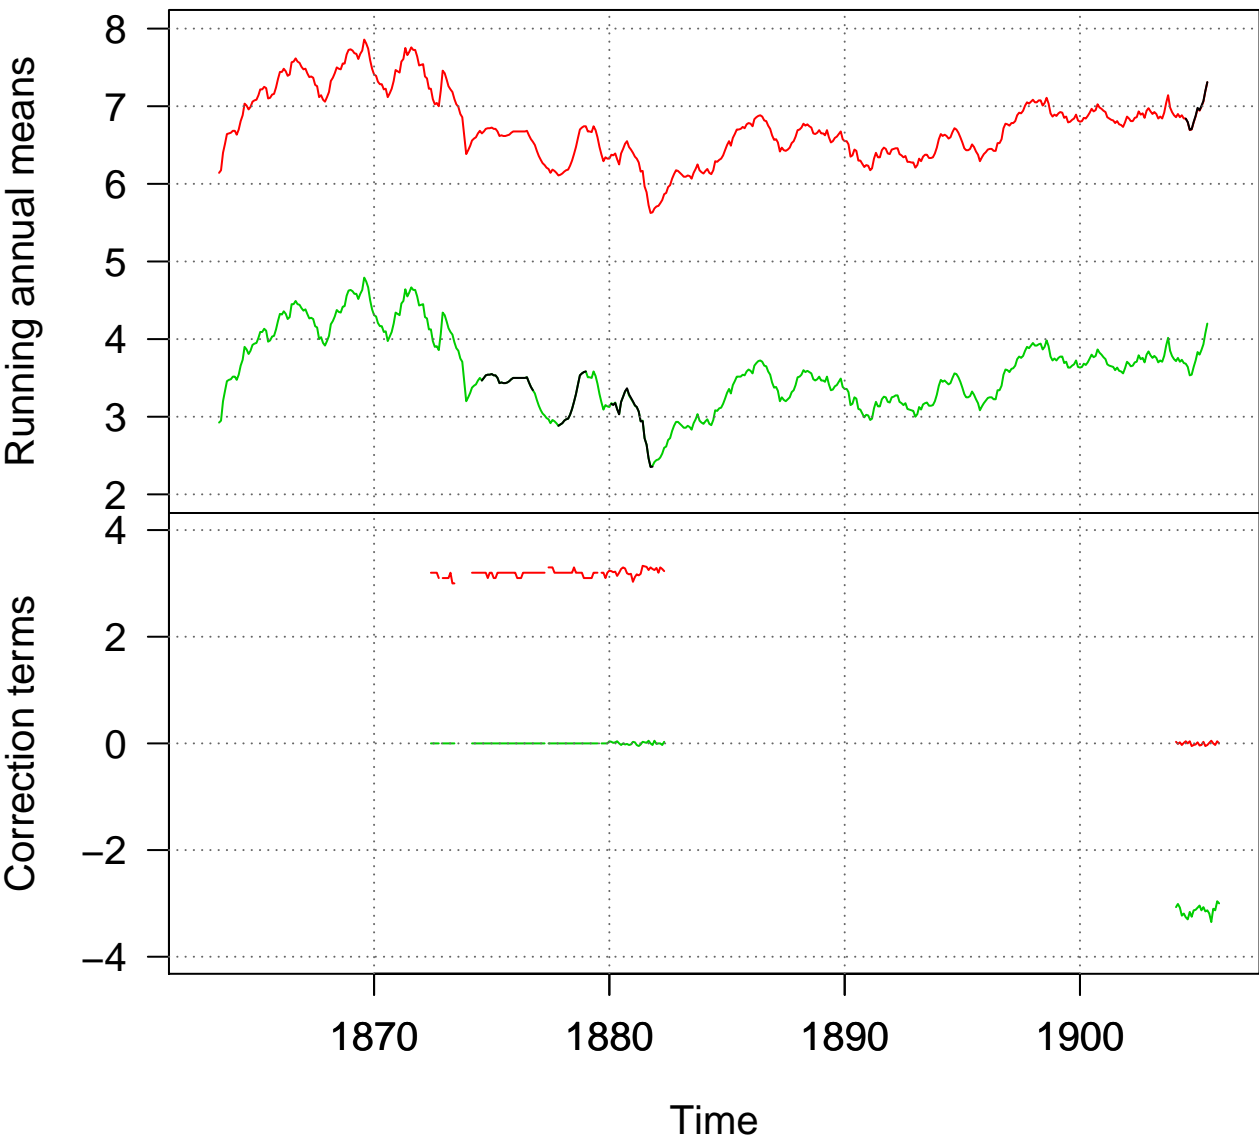

**O3 17 (Faro)**

**Faro**

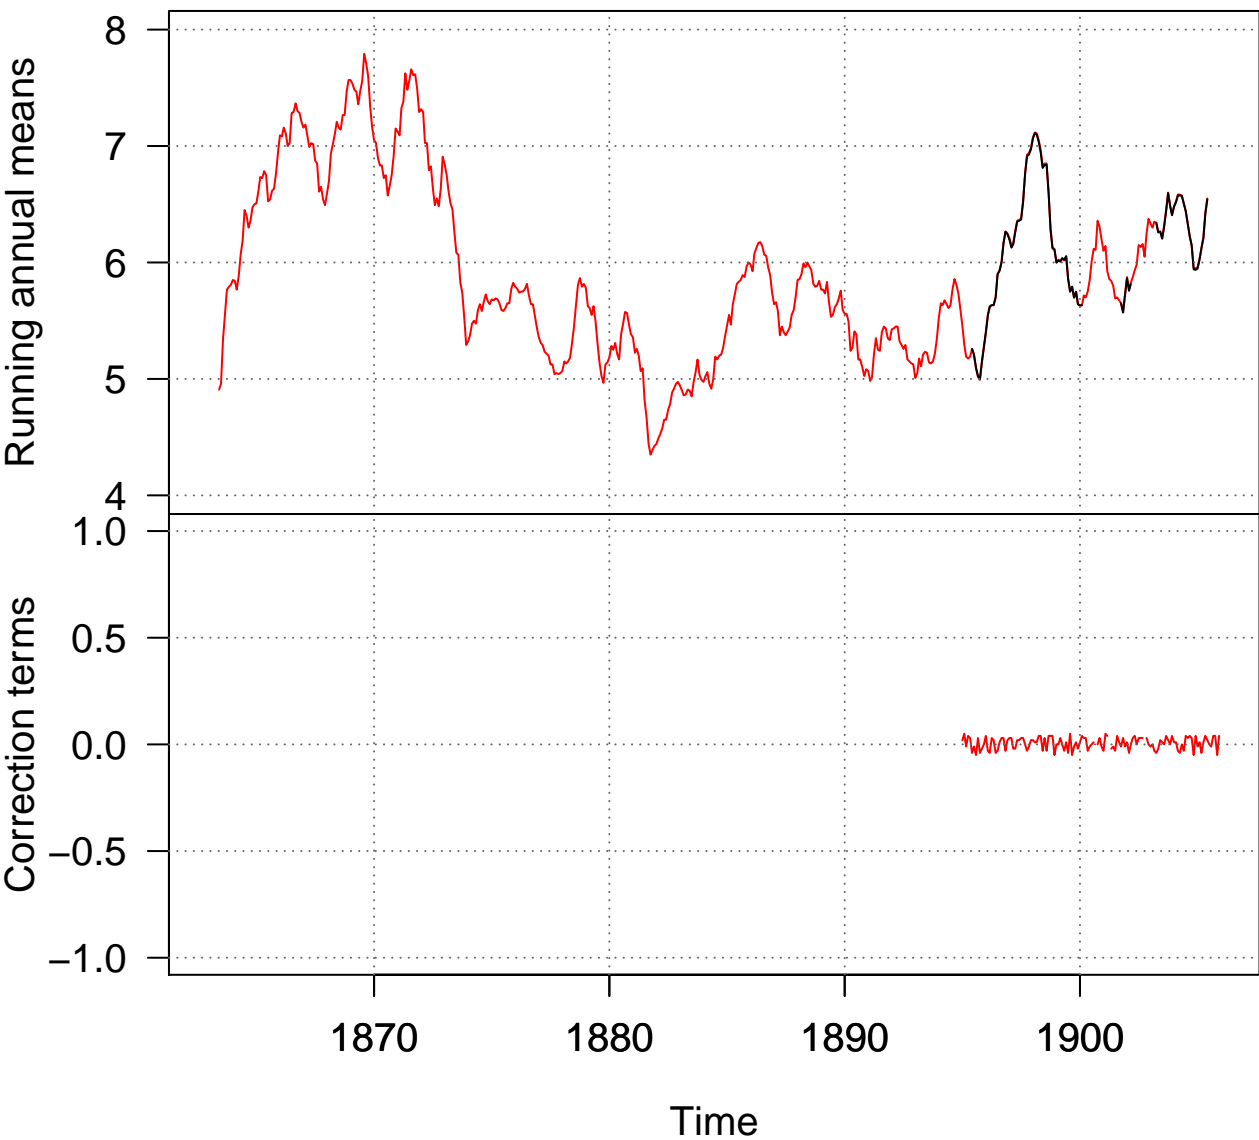

# O3 18 (Funchal) Funchal

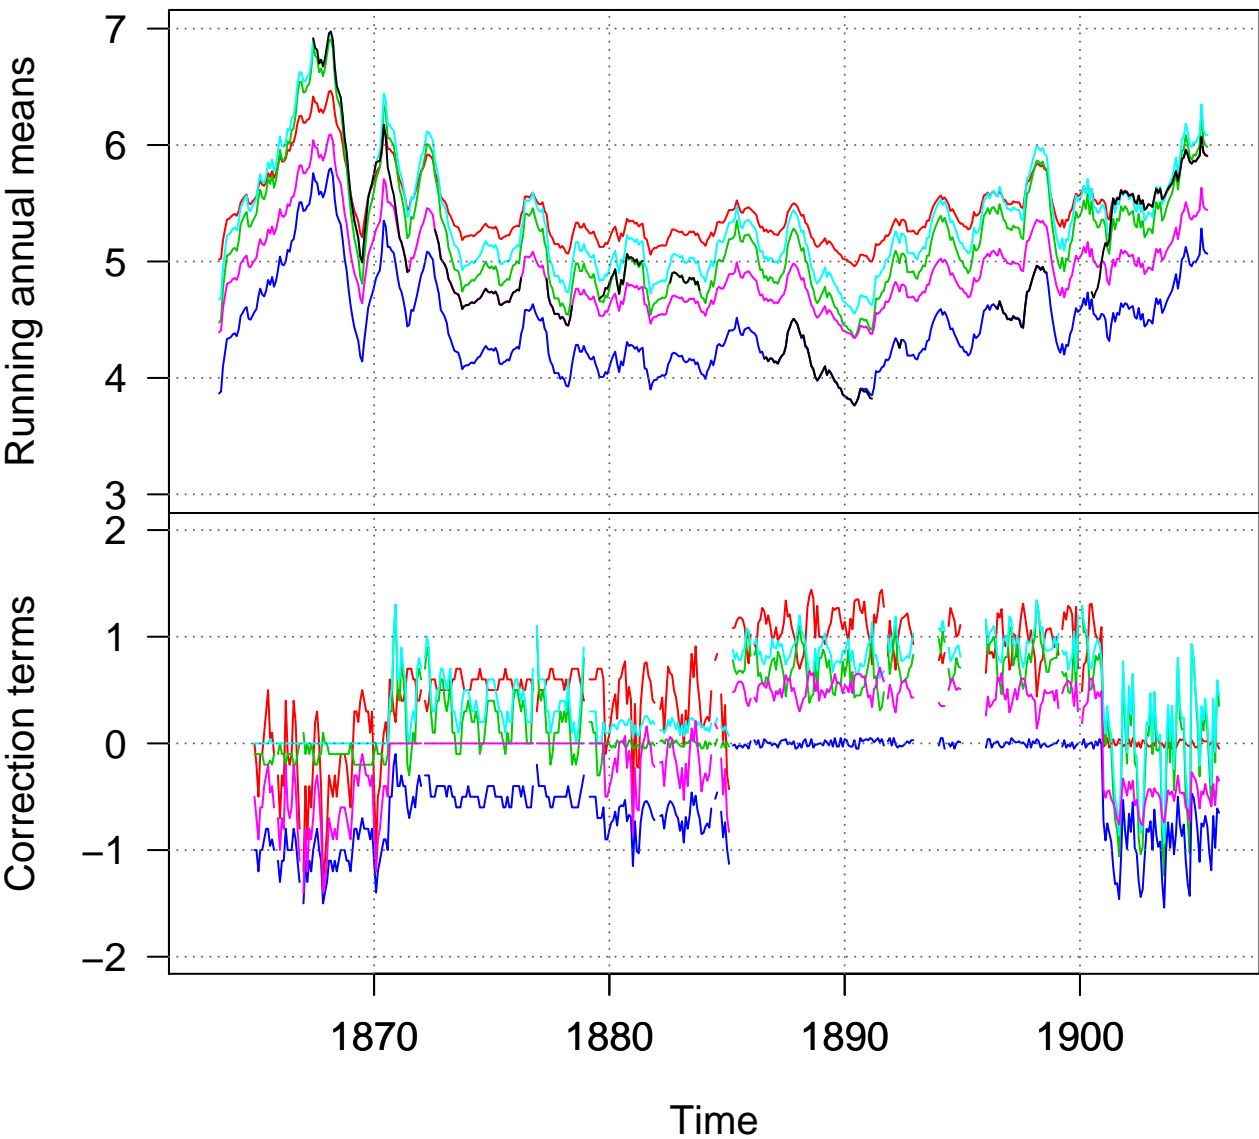

**O3 19 (S.\_Vicente)**  
**S. Vicente**

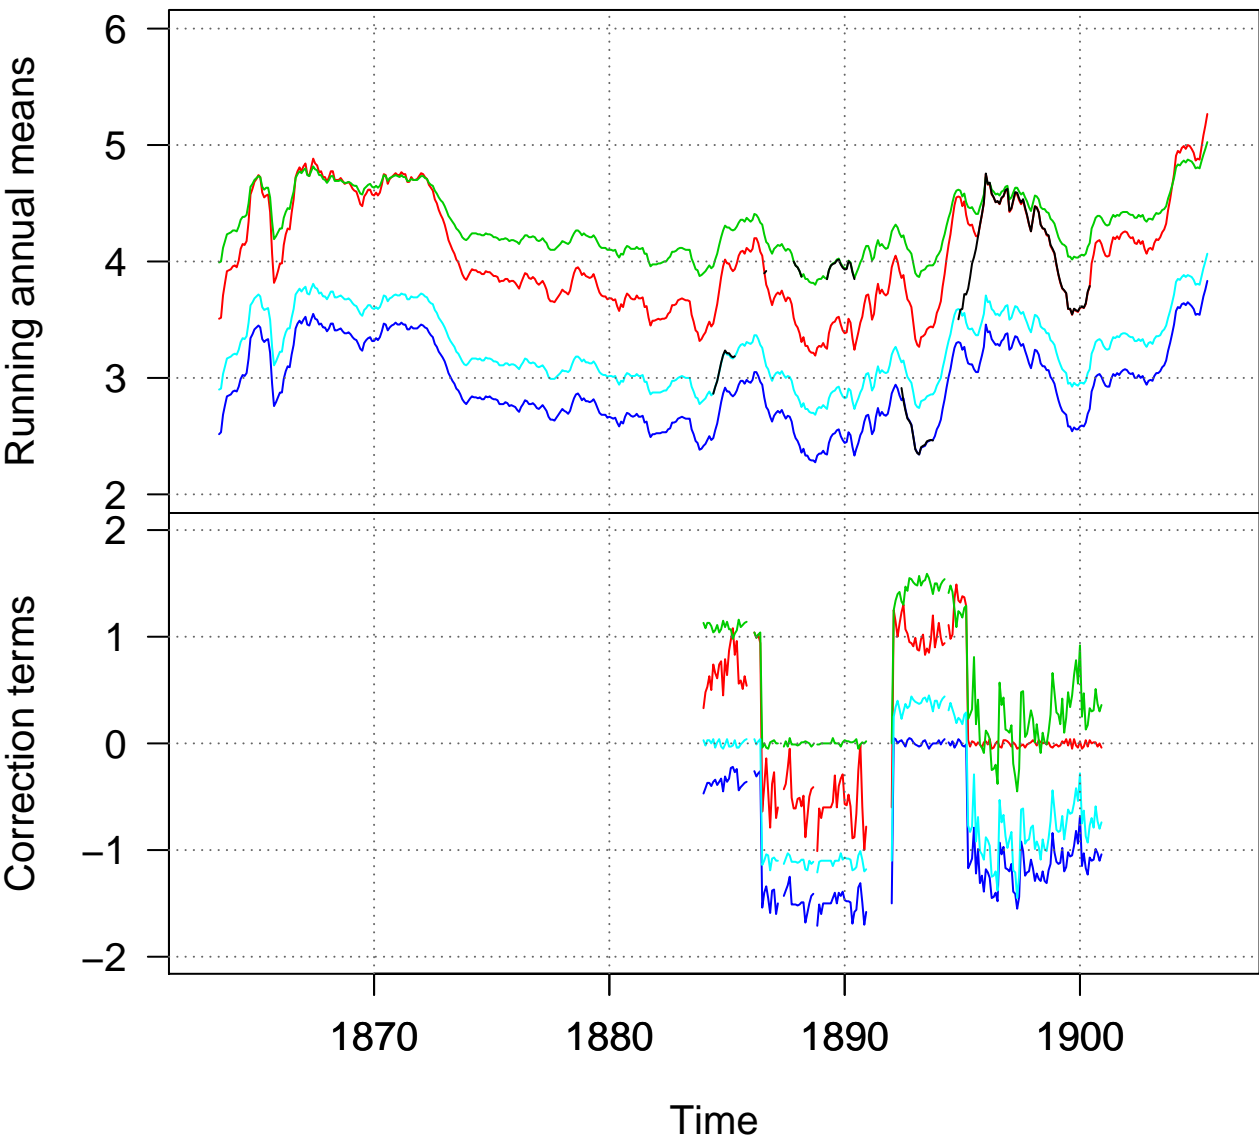

**O3 20 (Cidade\_da\_Praia)**  
**Cidade da Praia**

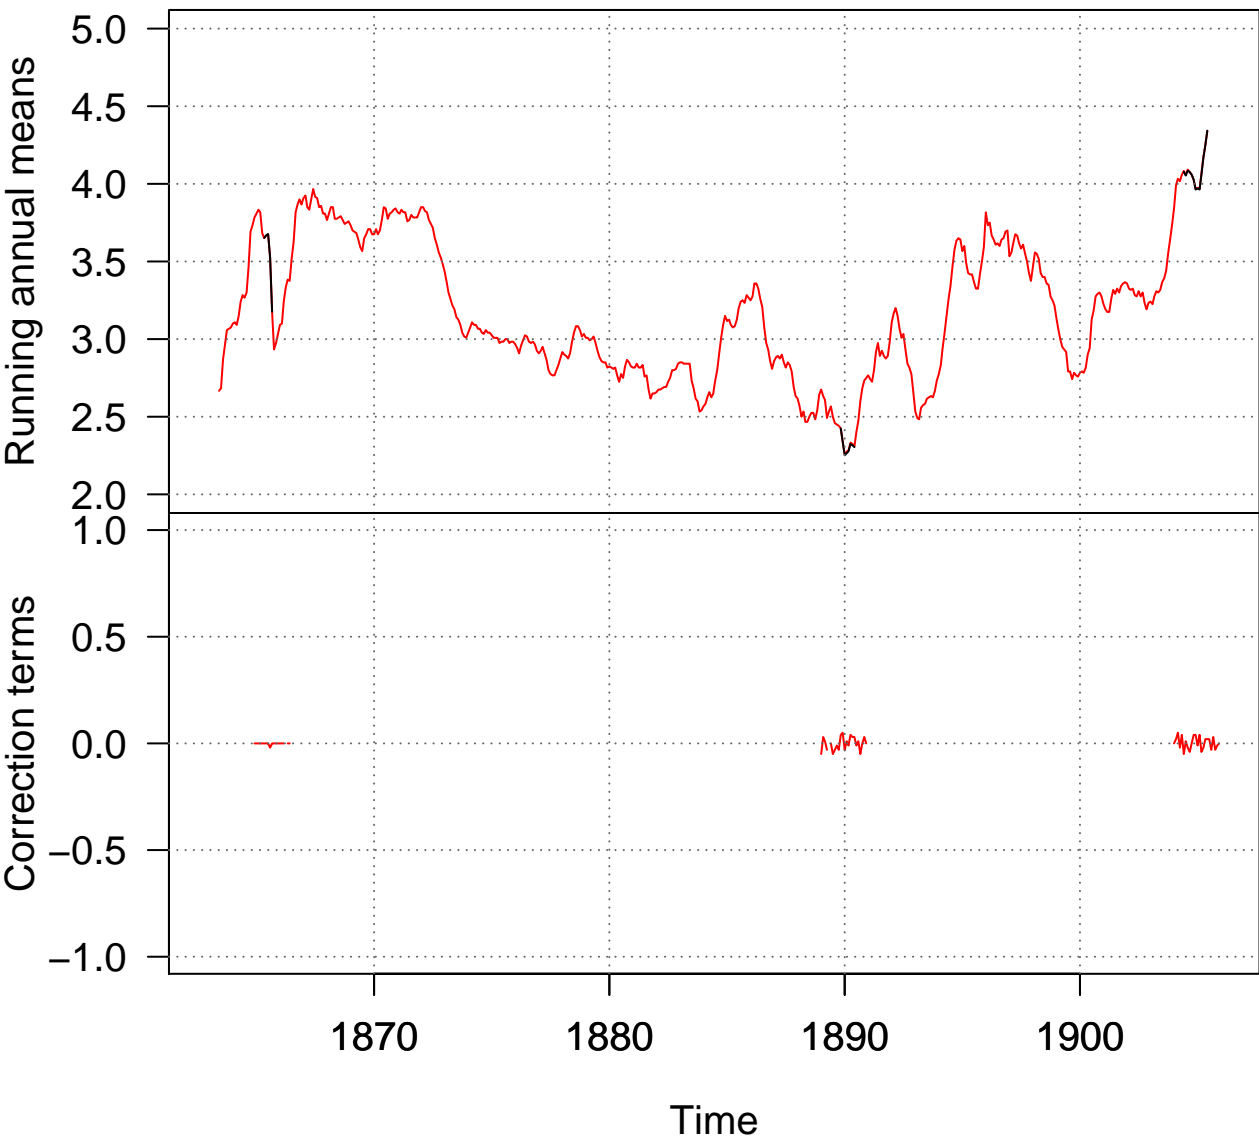

**O3 21 (S.\_Thome)**  
**S. Thome**

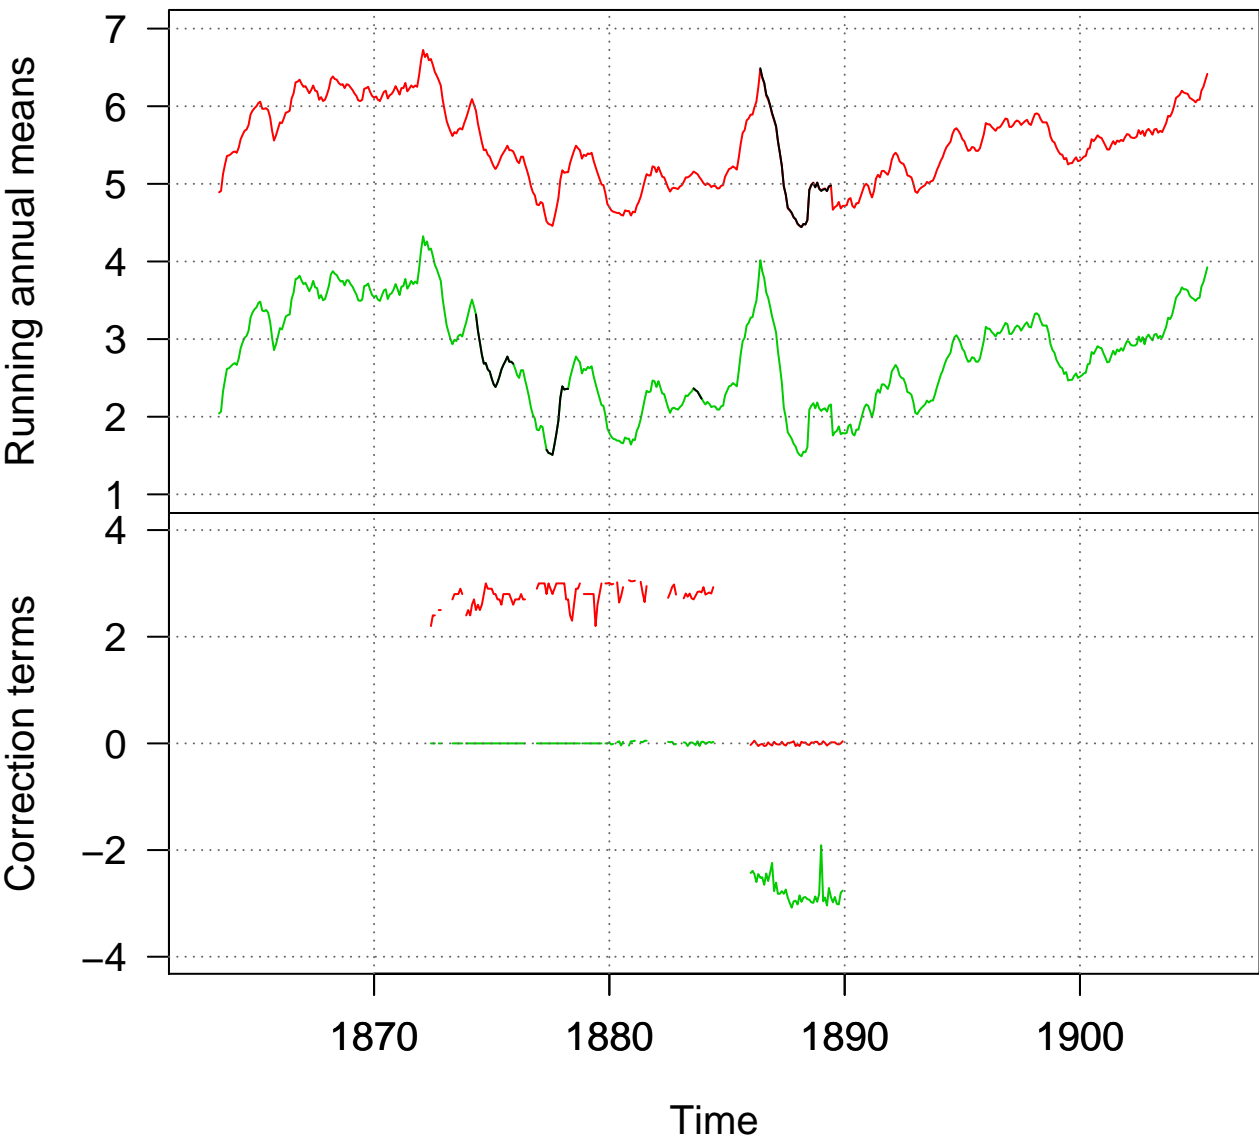

**O3 22 (S.\_Salvador\_do\_Congo)**  
**S. Salvador do Congo**

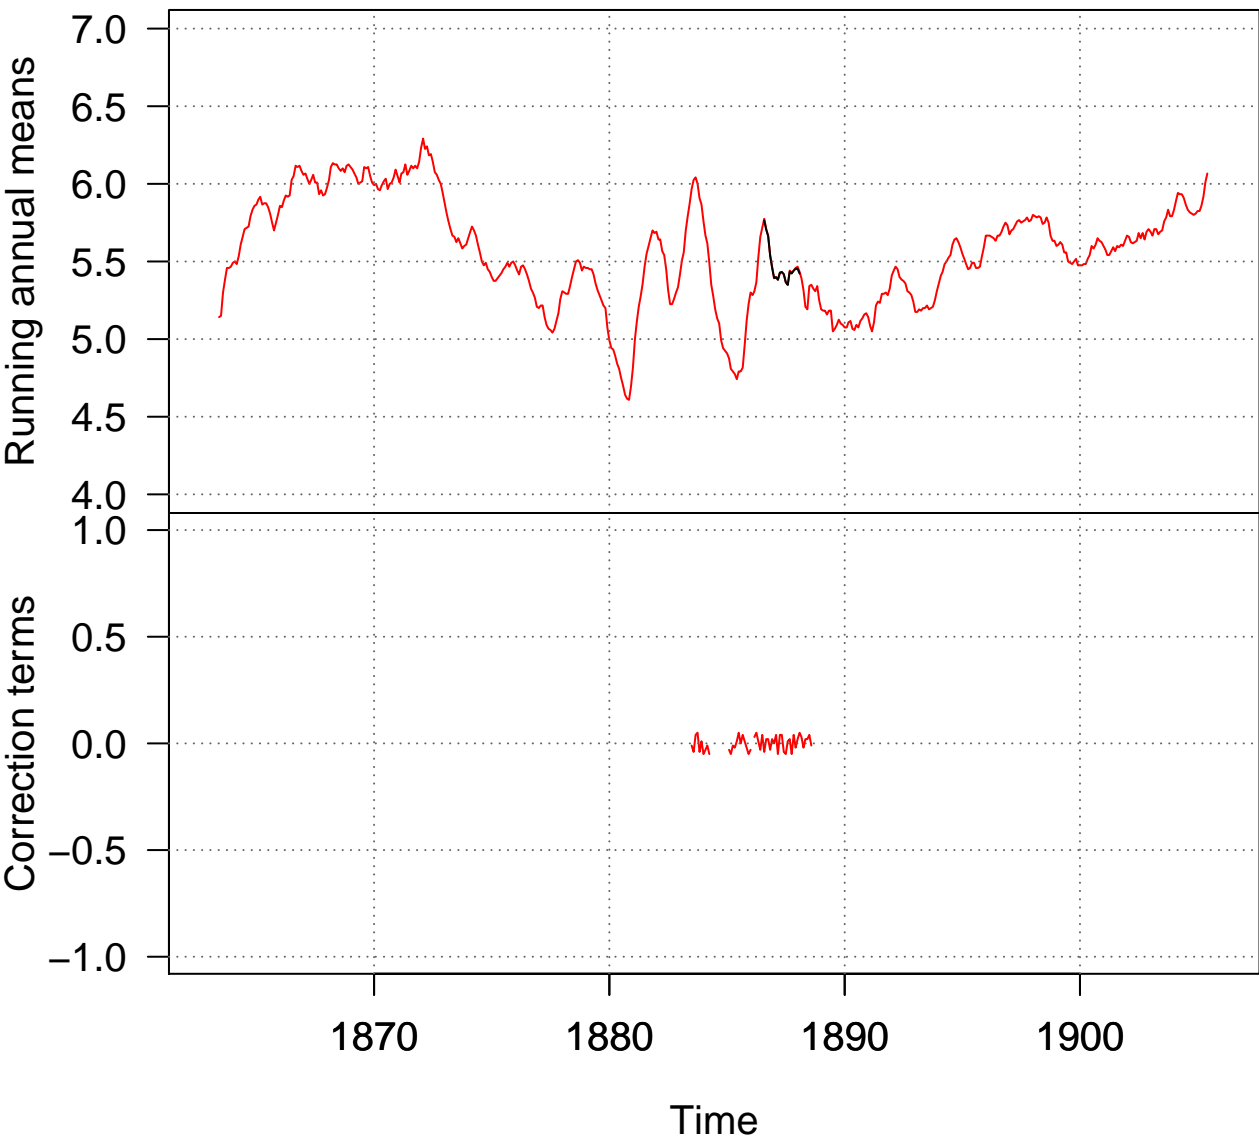

# O3 23 (Loanda) Loanda

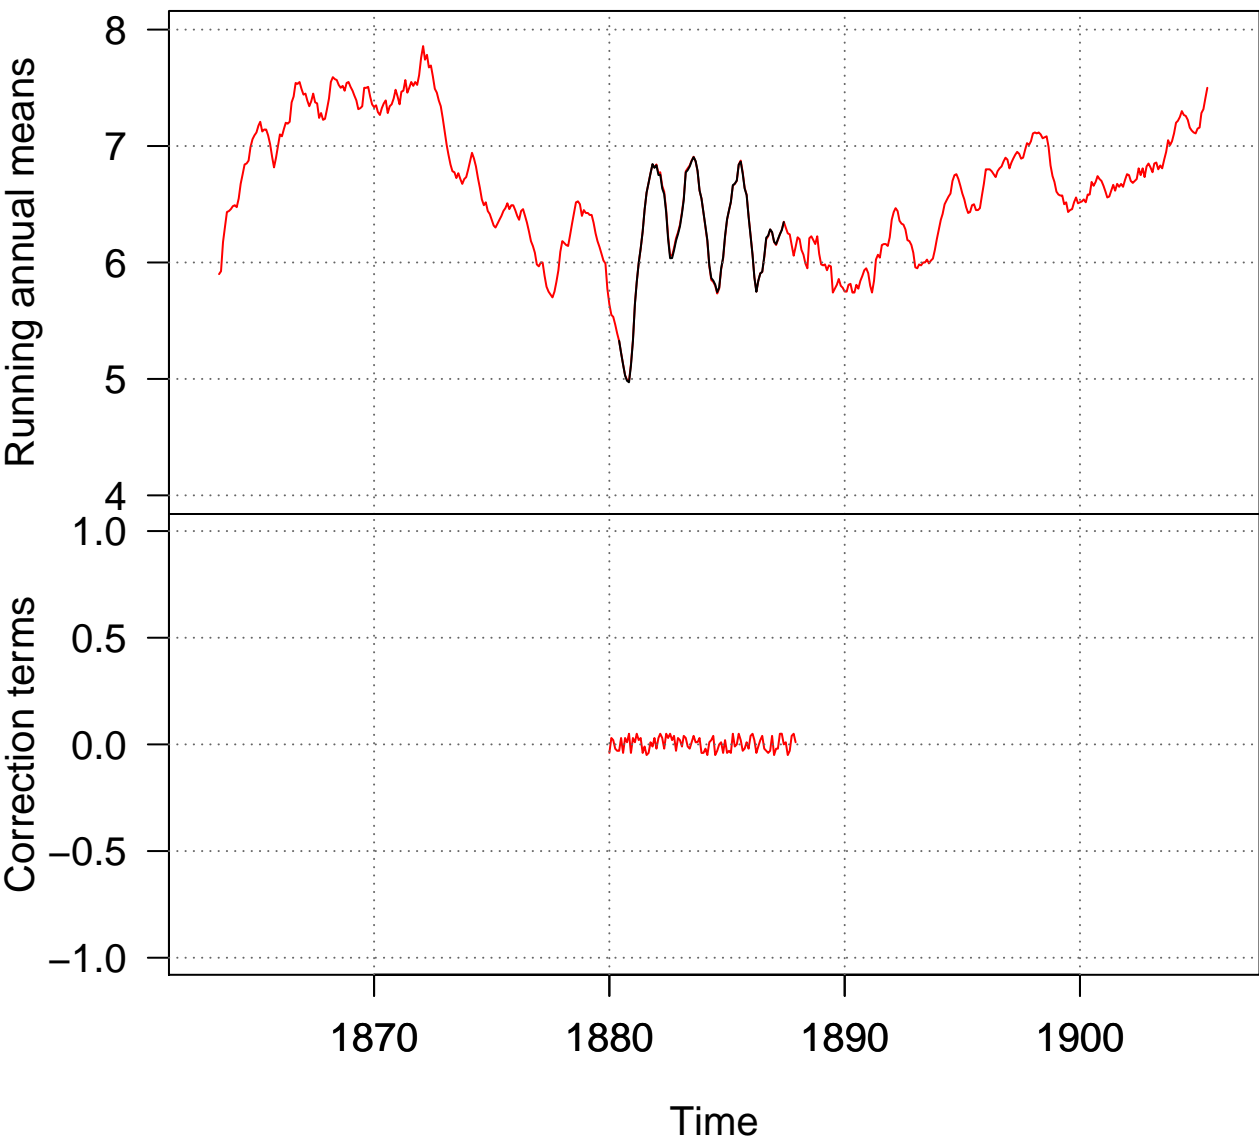



# Histogram of standardized anomalies

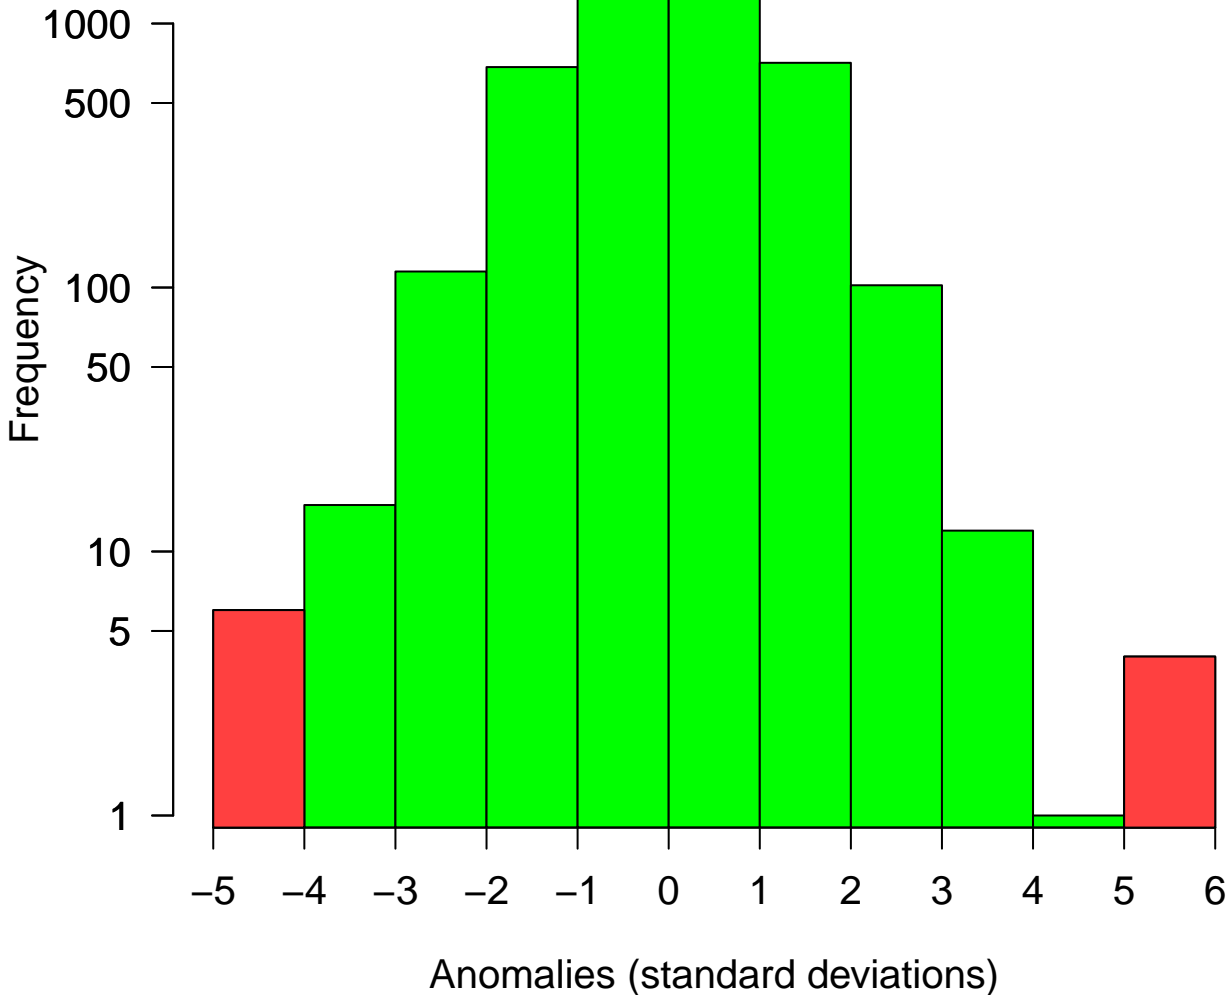

**Histogram of maximum windowed SNHT**

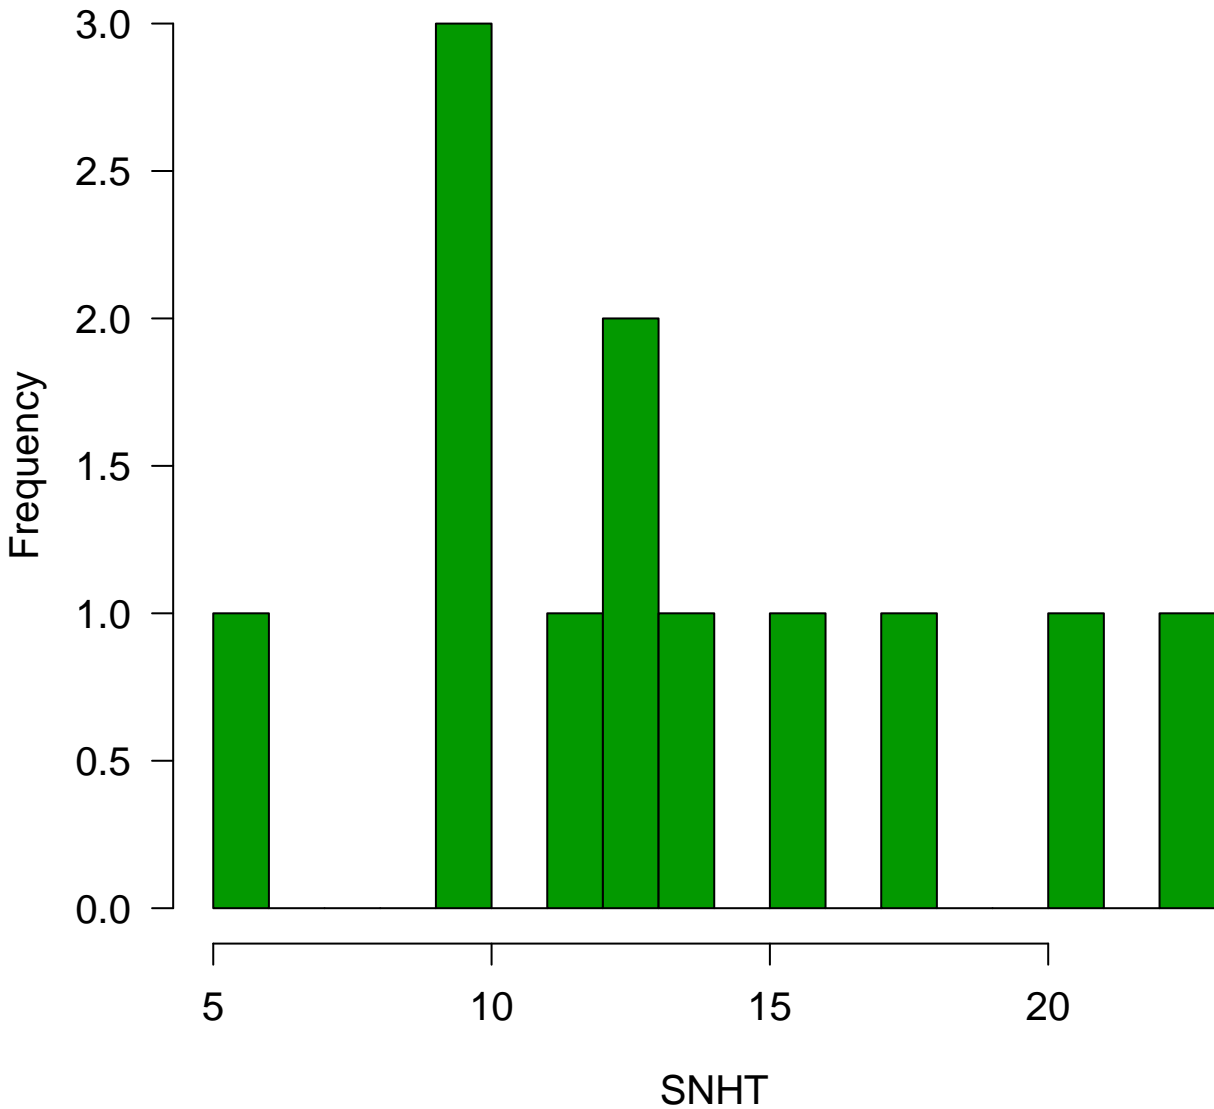

**Histogram of maximum global SNHT**

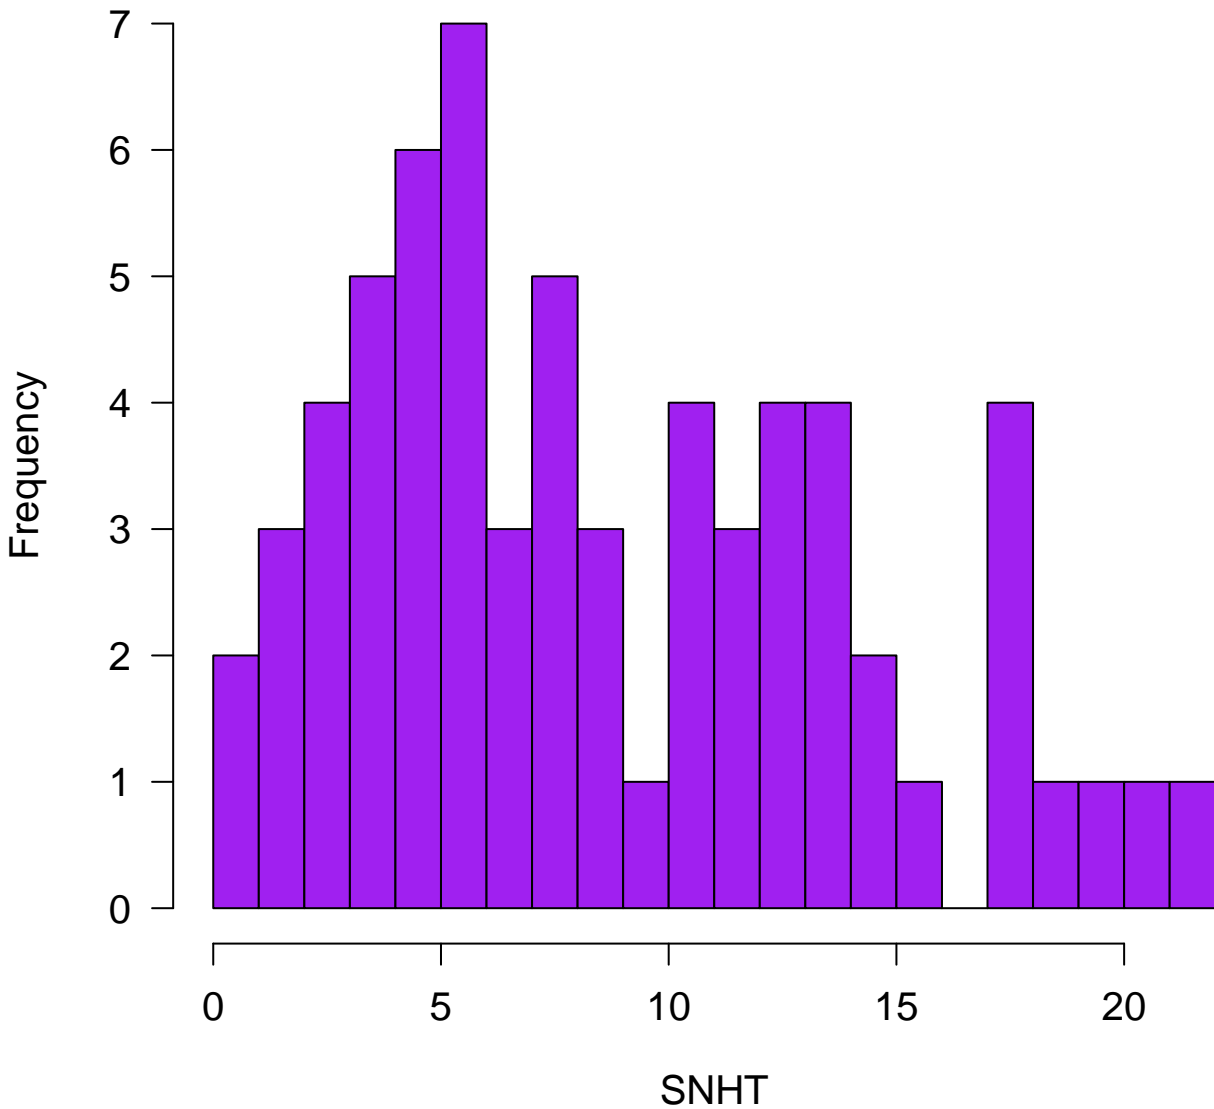

Station's quality/singularity

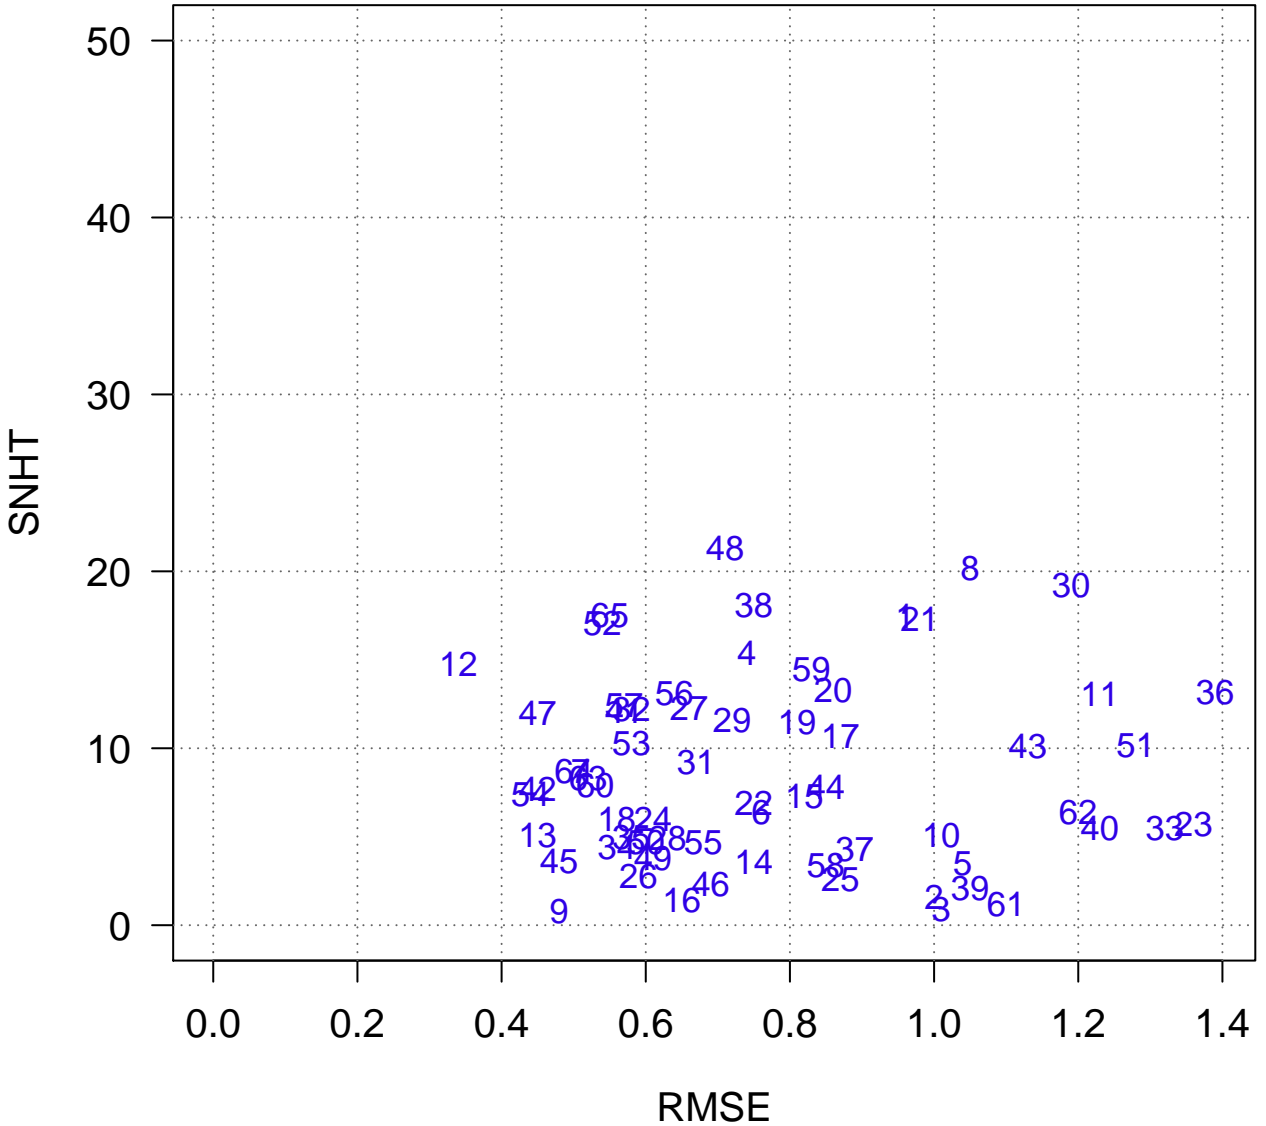

Supplement: Supplementary file 1 [file essd-17-2437-2025-supplement.zip]
