# Supplementary material for: Nineteenth- and twentieth-century semi-quantitative surface ozone along subtropical European to tropical Africa Atlantic coasts
Source: Copernicus journal article supplement (doi:10.5194/essd-17-2437-2025), 2025-06-06

# CLIMATOL 4.0.0

Homogenization  
graphic output of  
RH  
1863–1905

## RH data

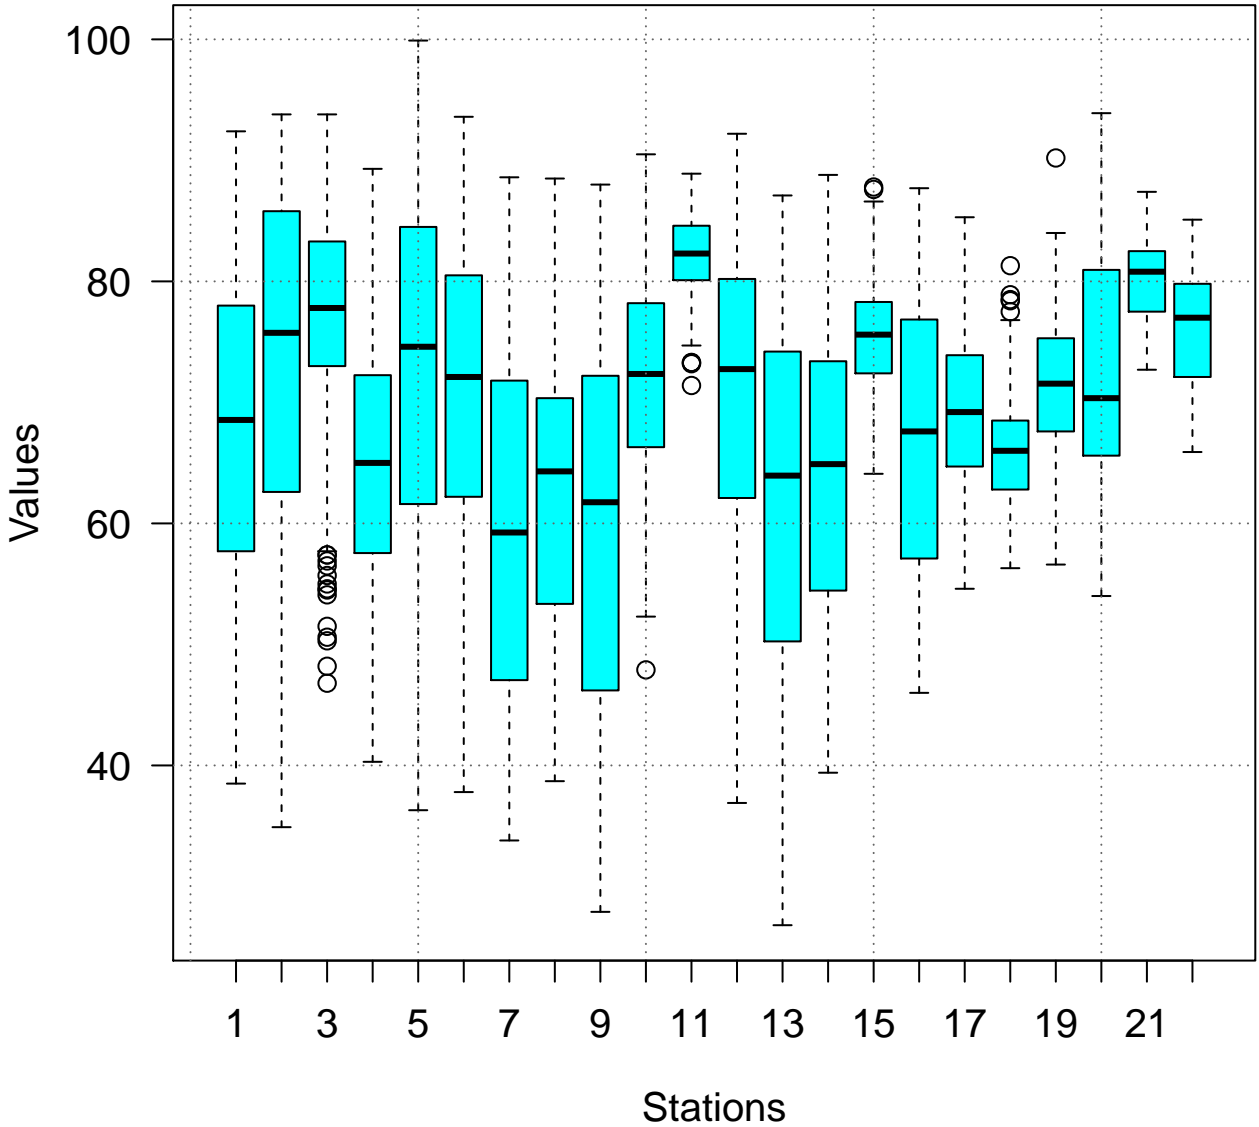

# RH data increments

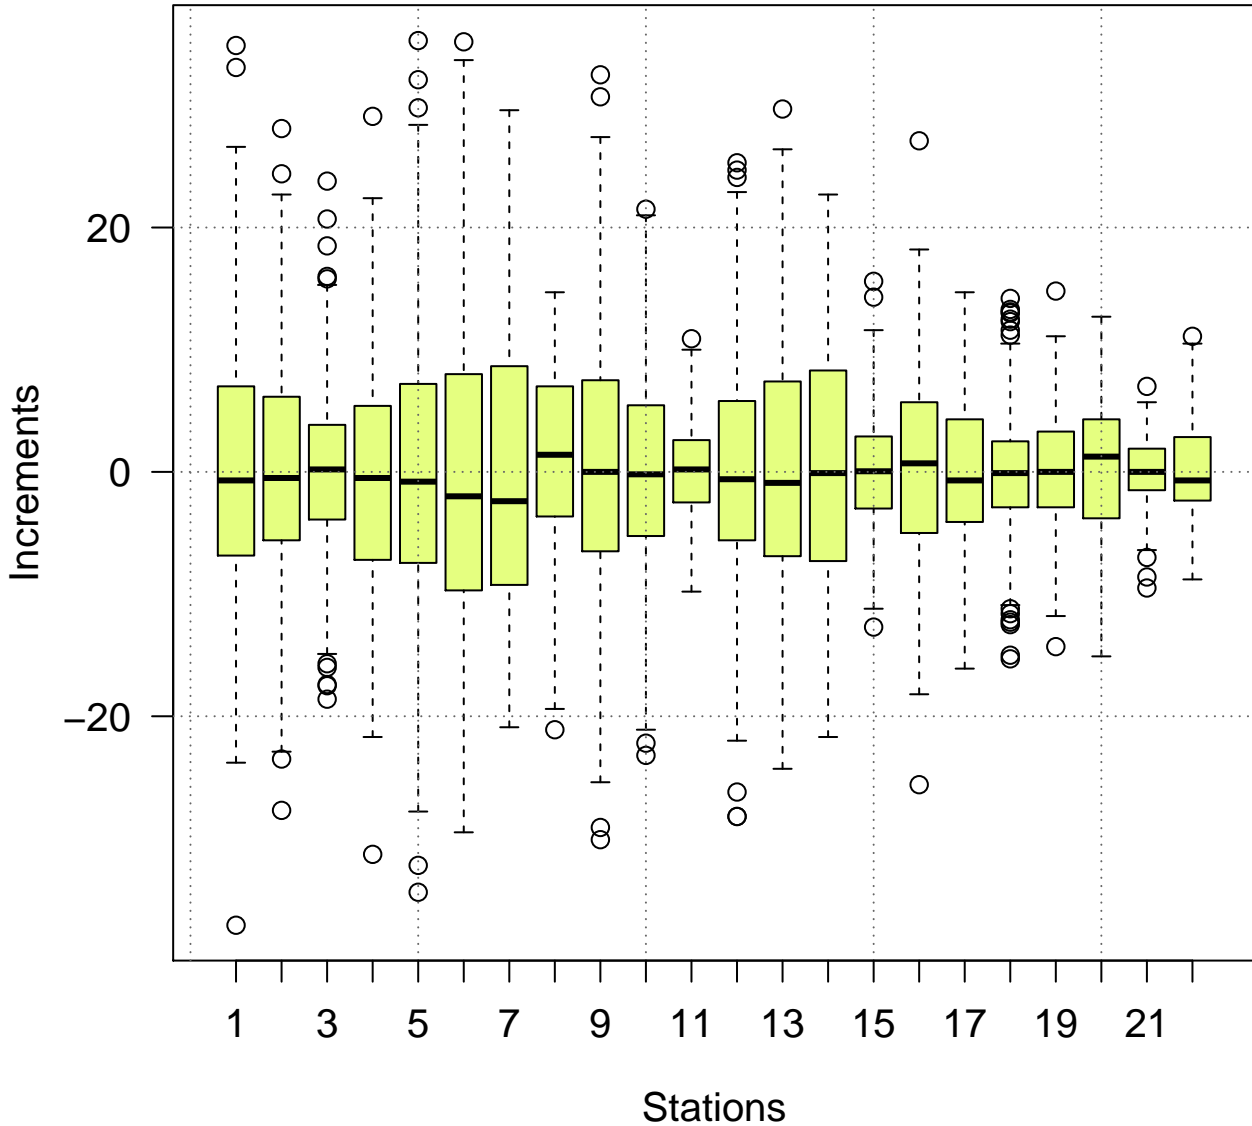

# RH run lengths

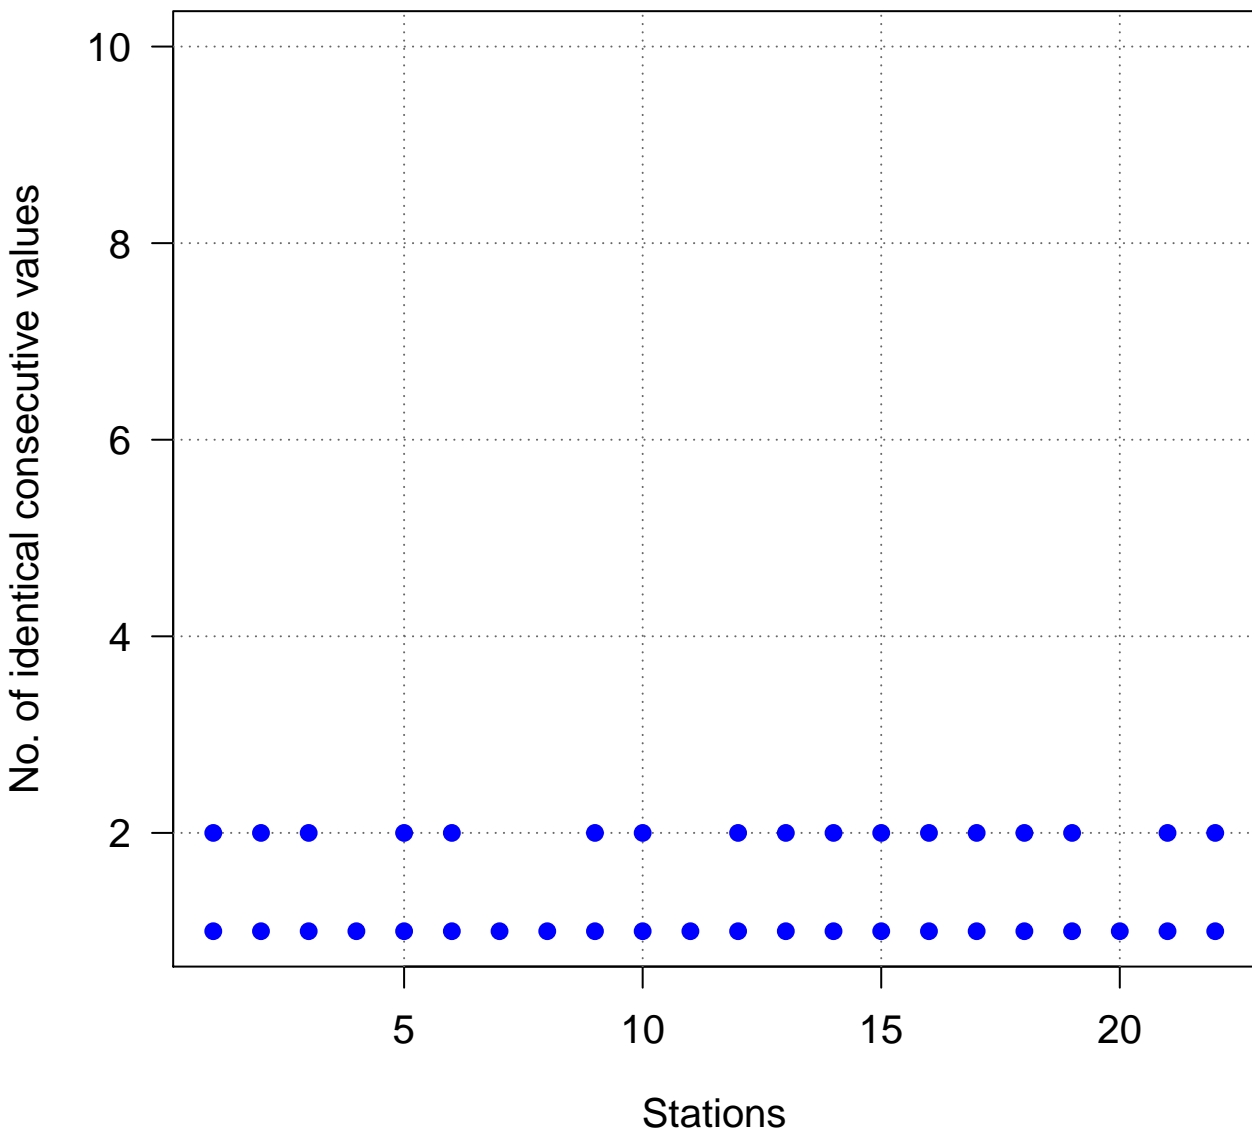

# RH data availability

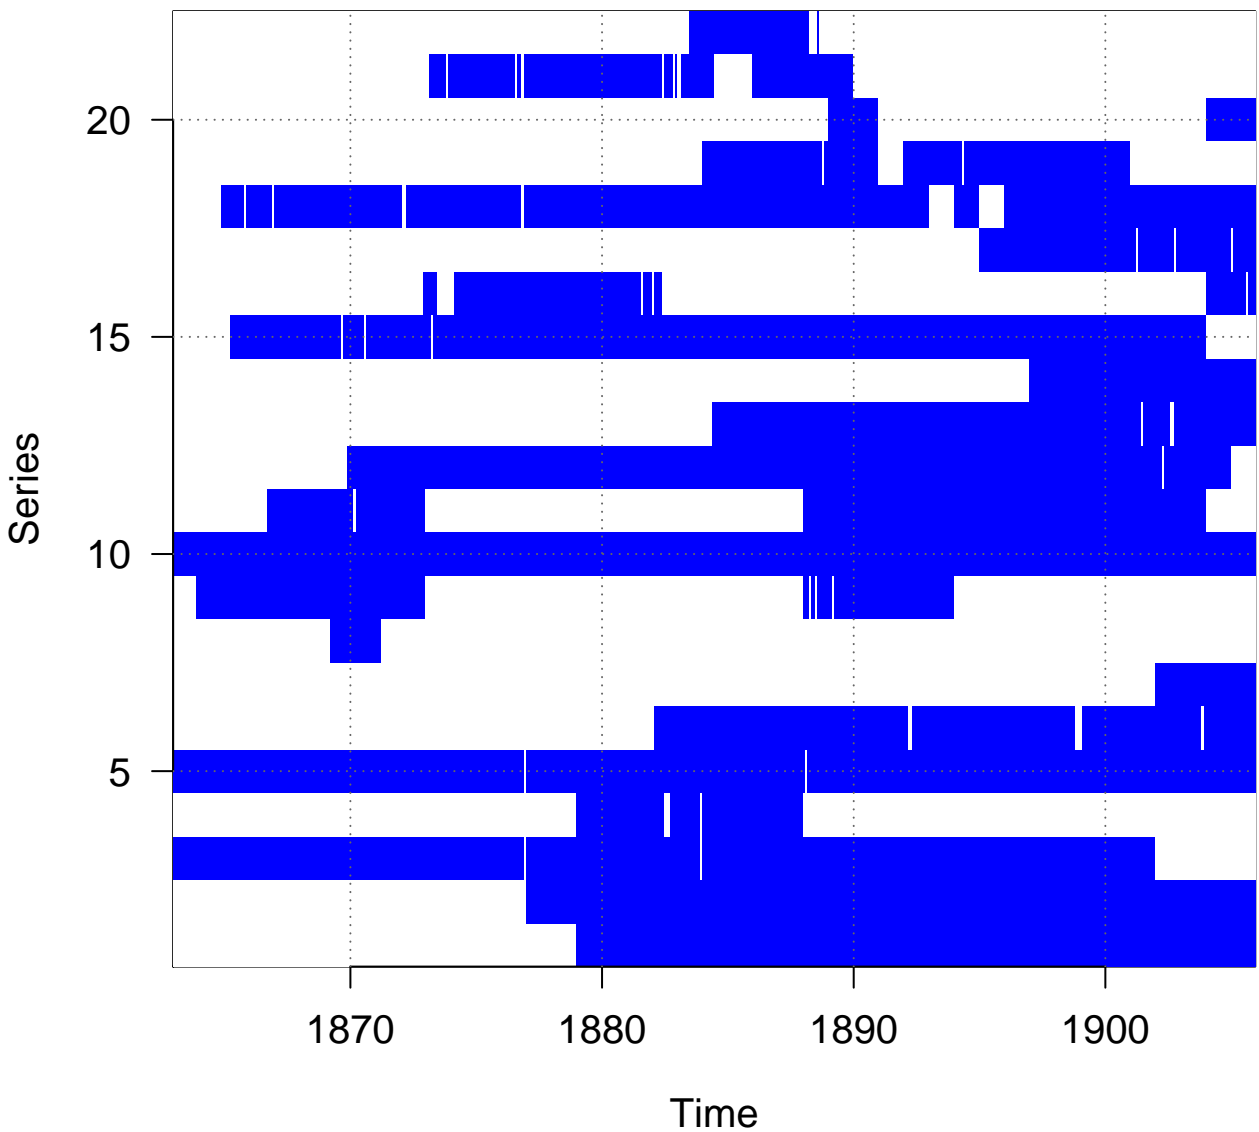

# Number of RH data in all stations

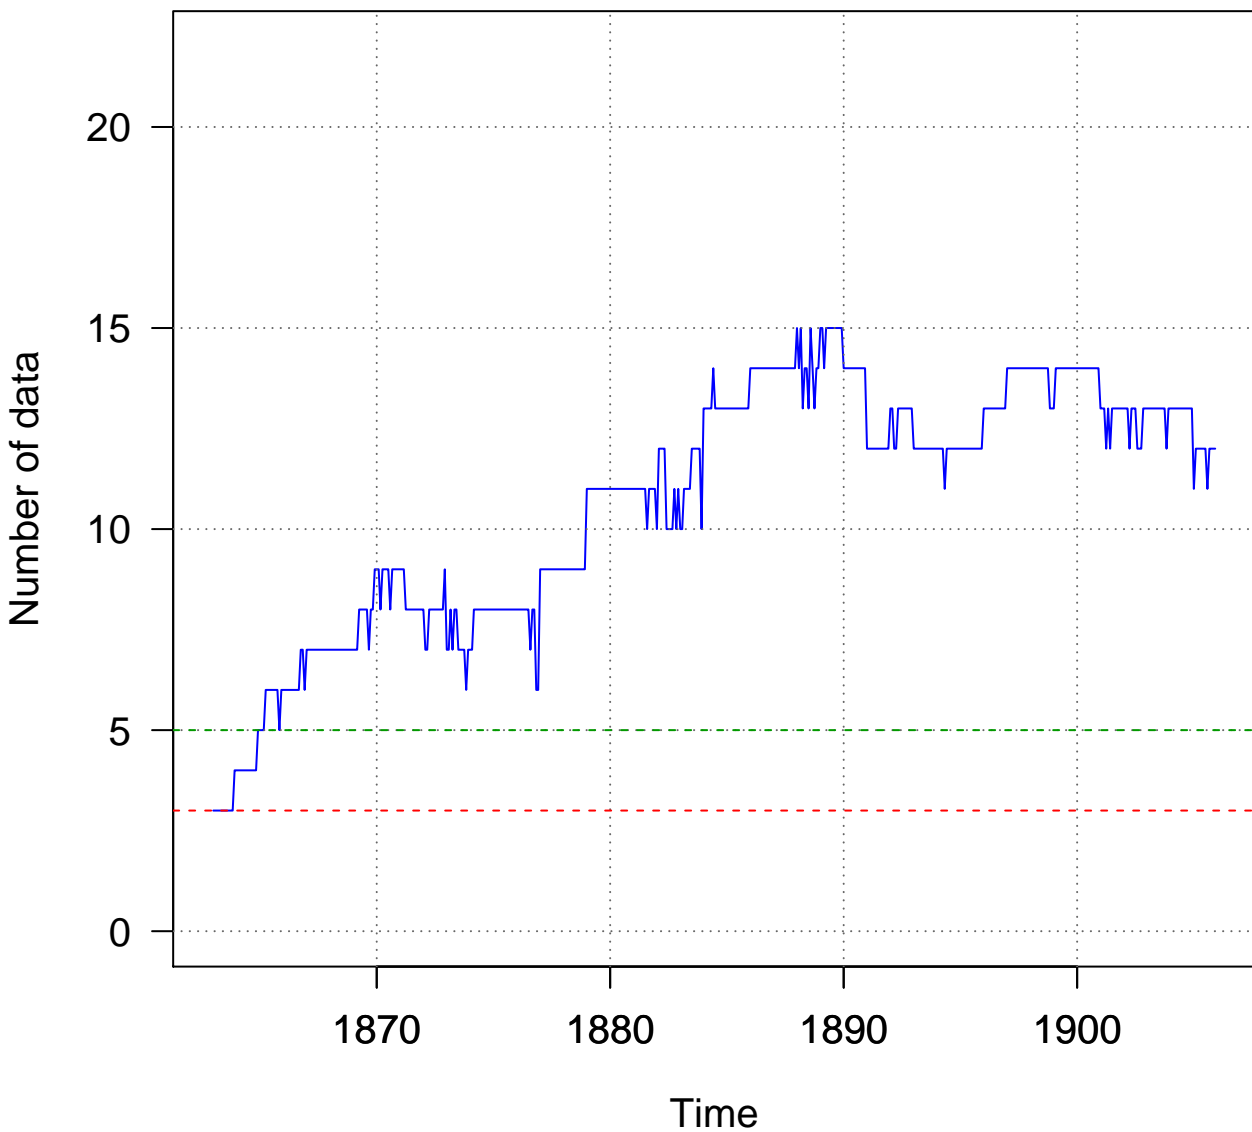

**Histogram of all data**

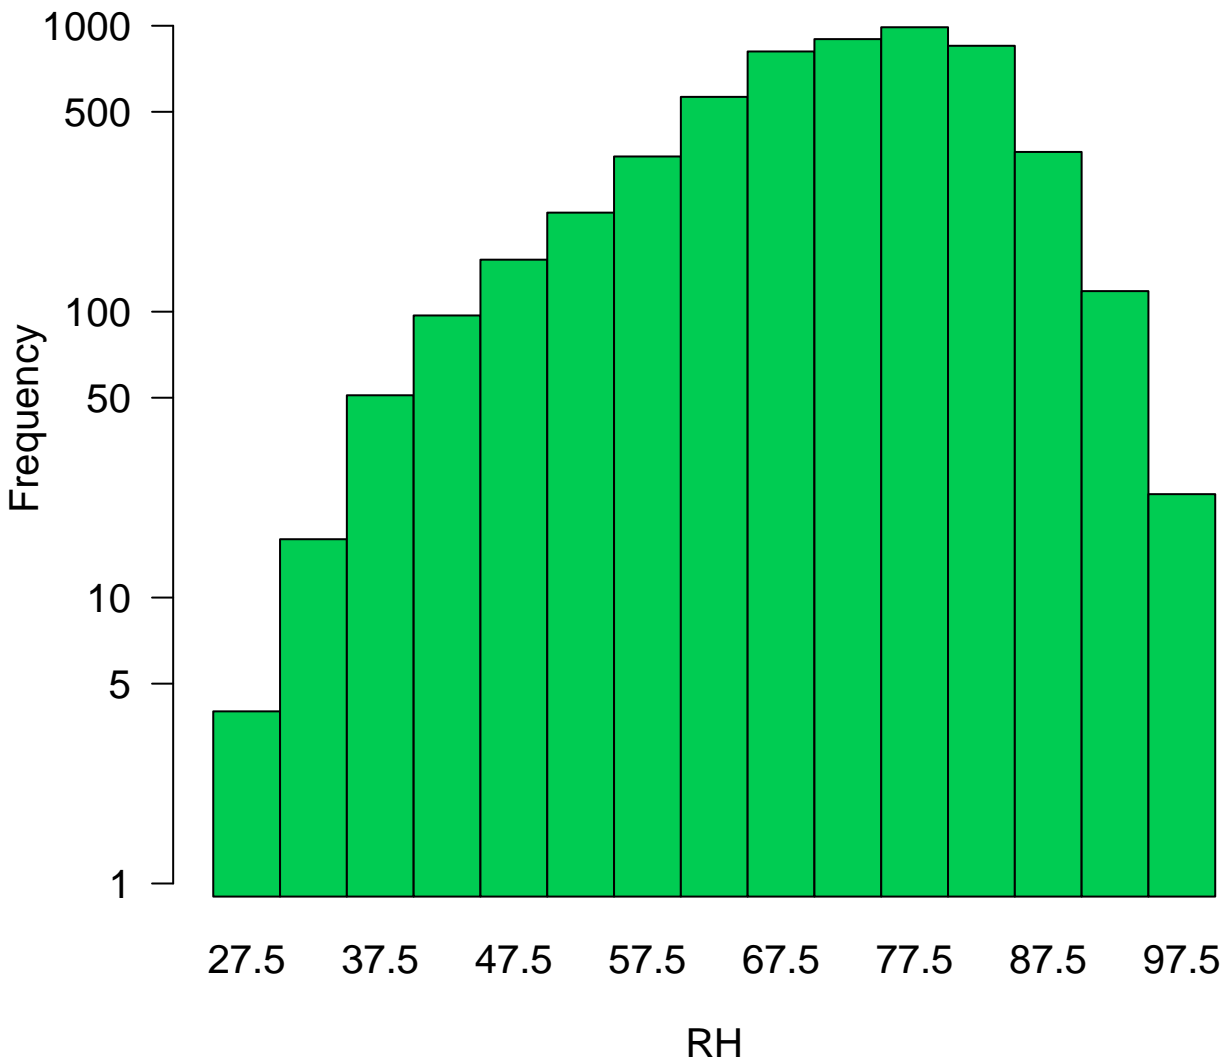

**Correlogram of first difference RH series**

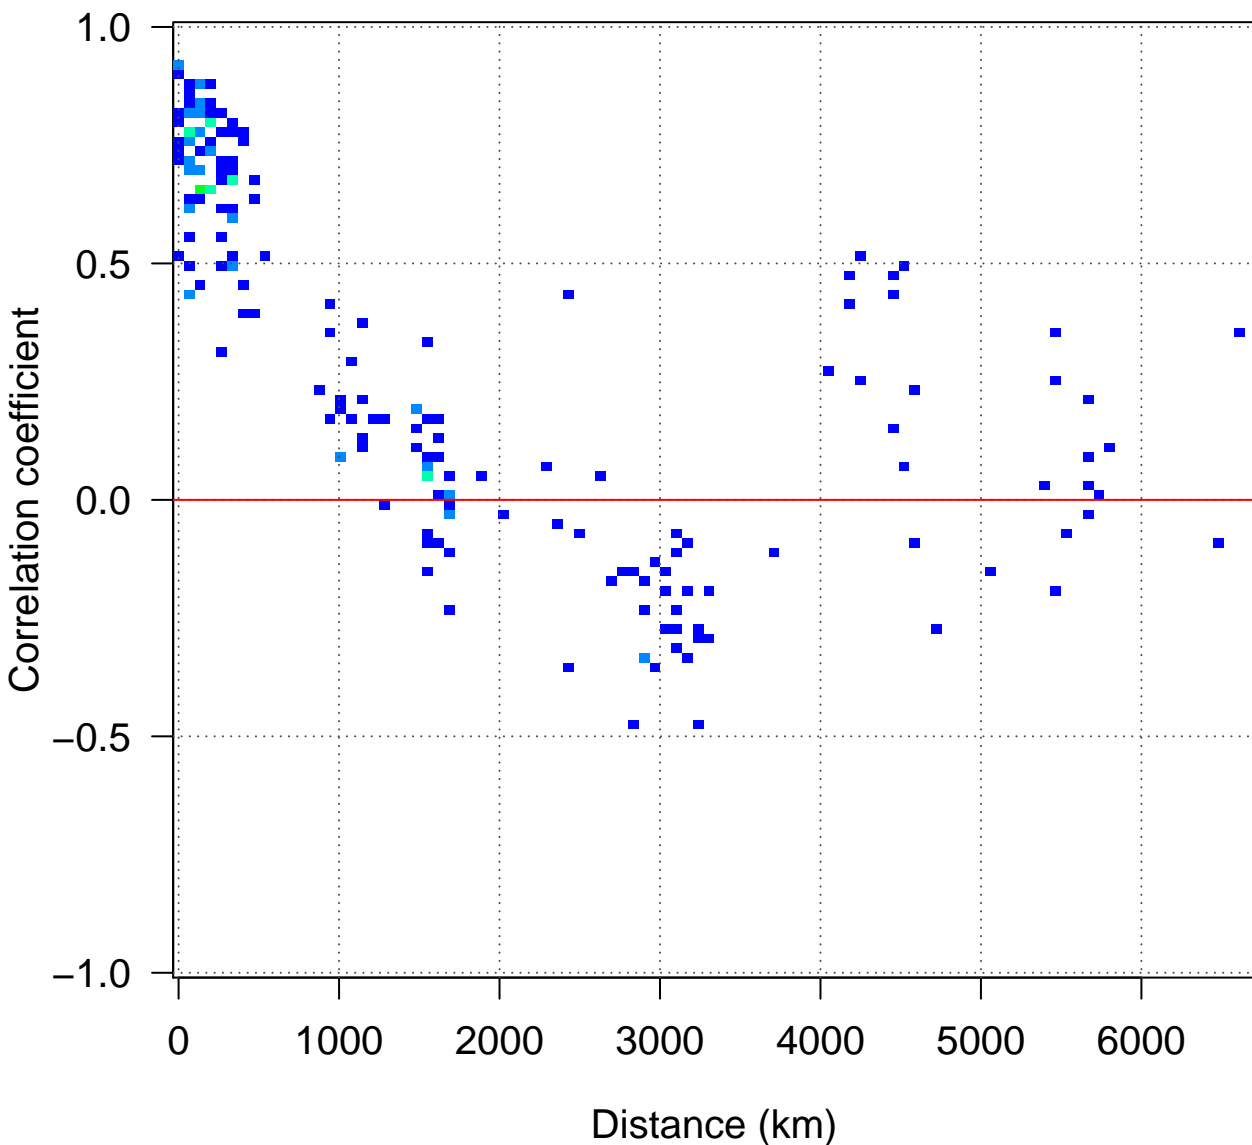



## Dendrogram of station clusters

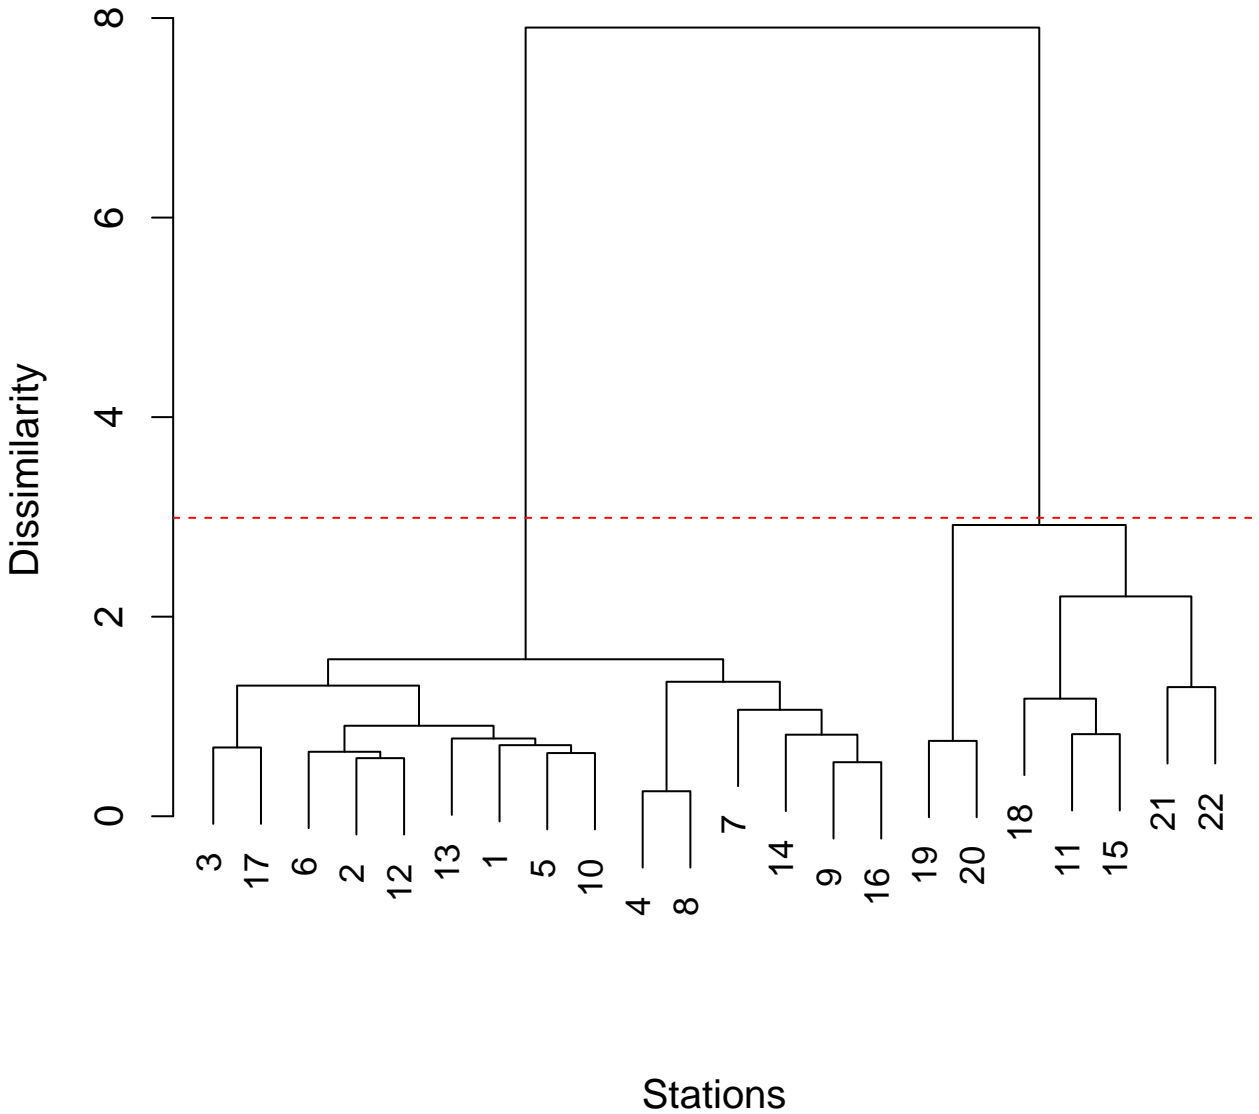

# RH station locations (2 clusters)

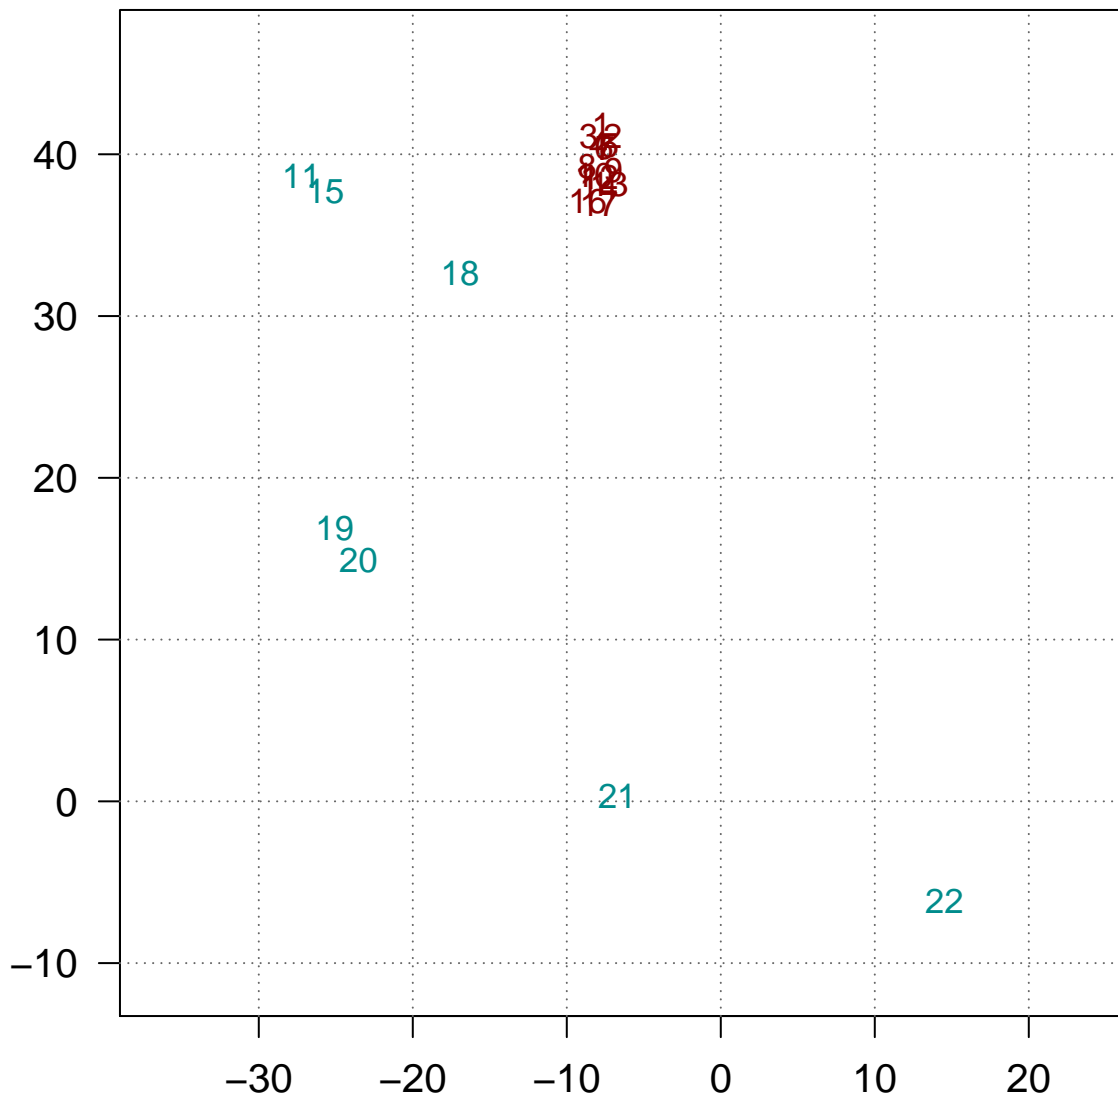

# Stage 1

Binary splits on 60 term  
stepped windows with  
std=3, SNHT>25  
and wd=1000 km

# RH 5 (Guarda) Guarda

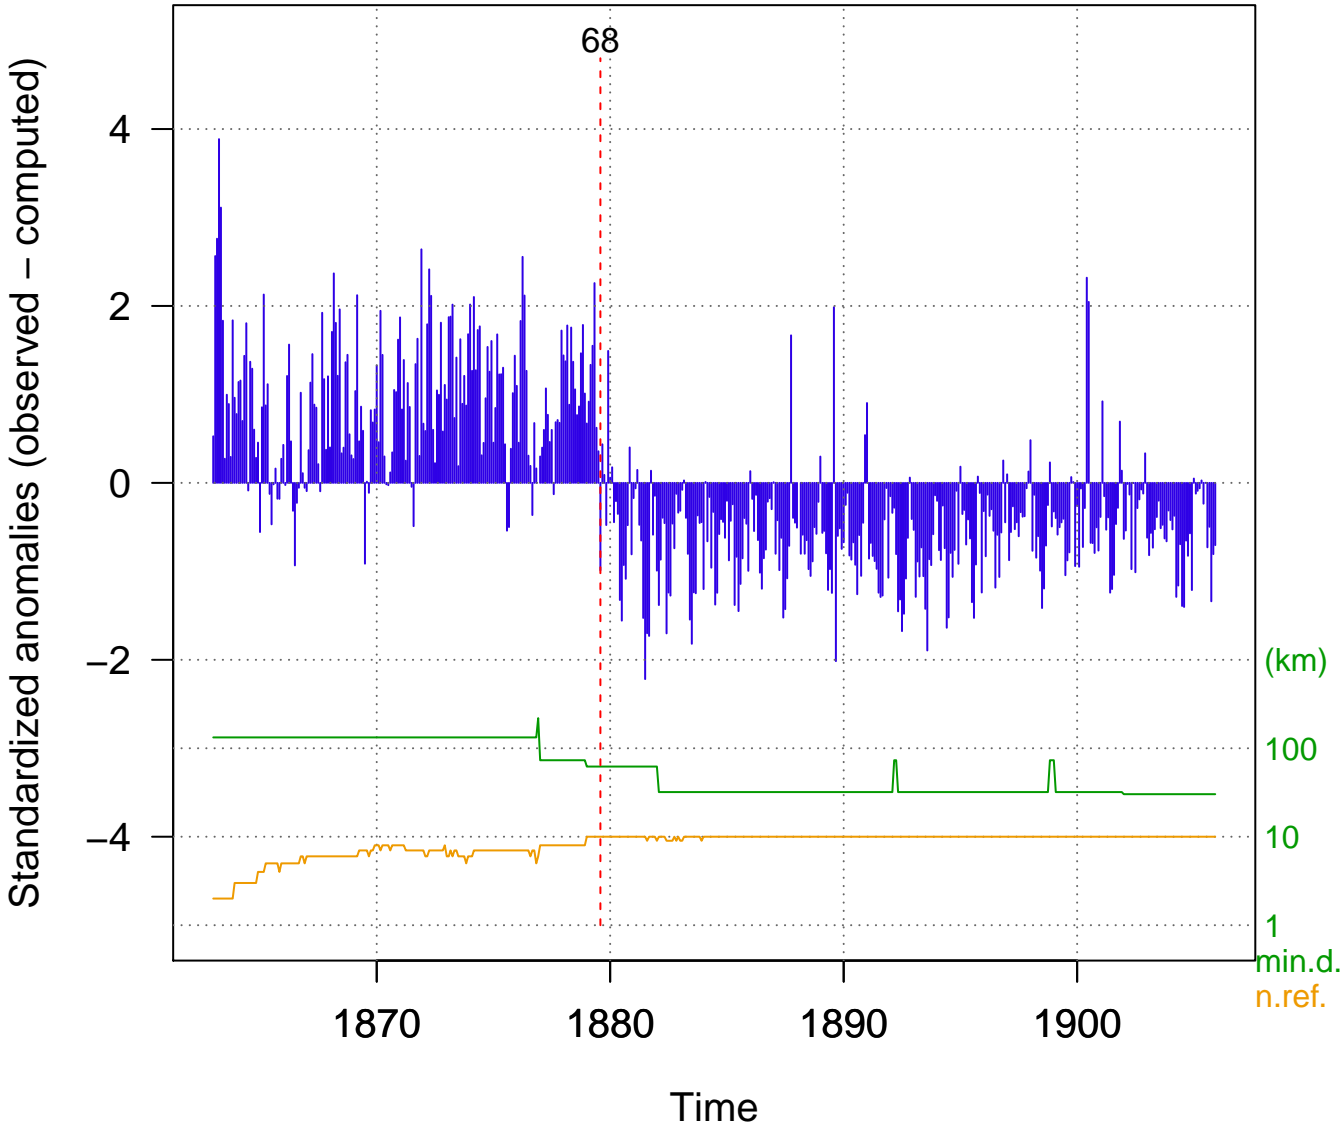

# RH 15 (Ponta\_Delgada)

## Ponta Delgada

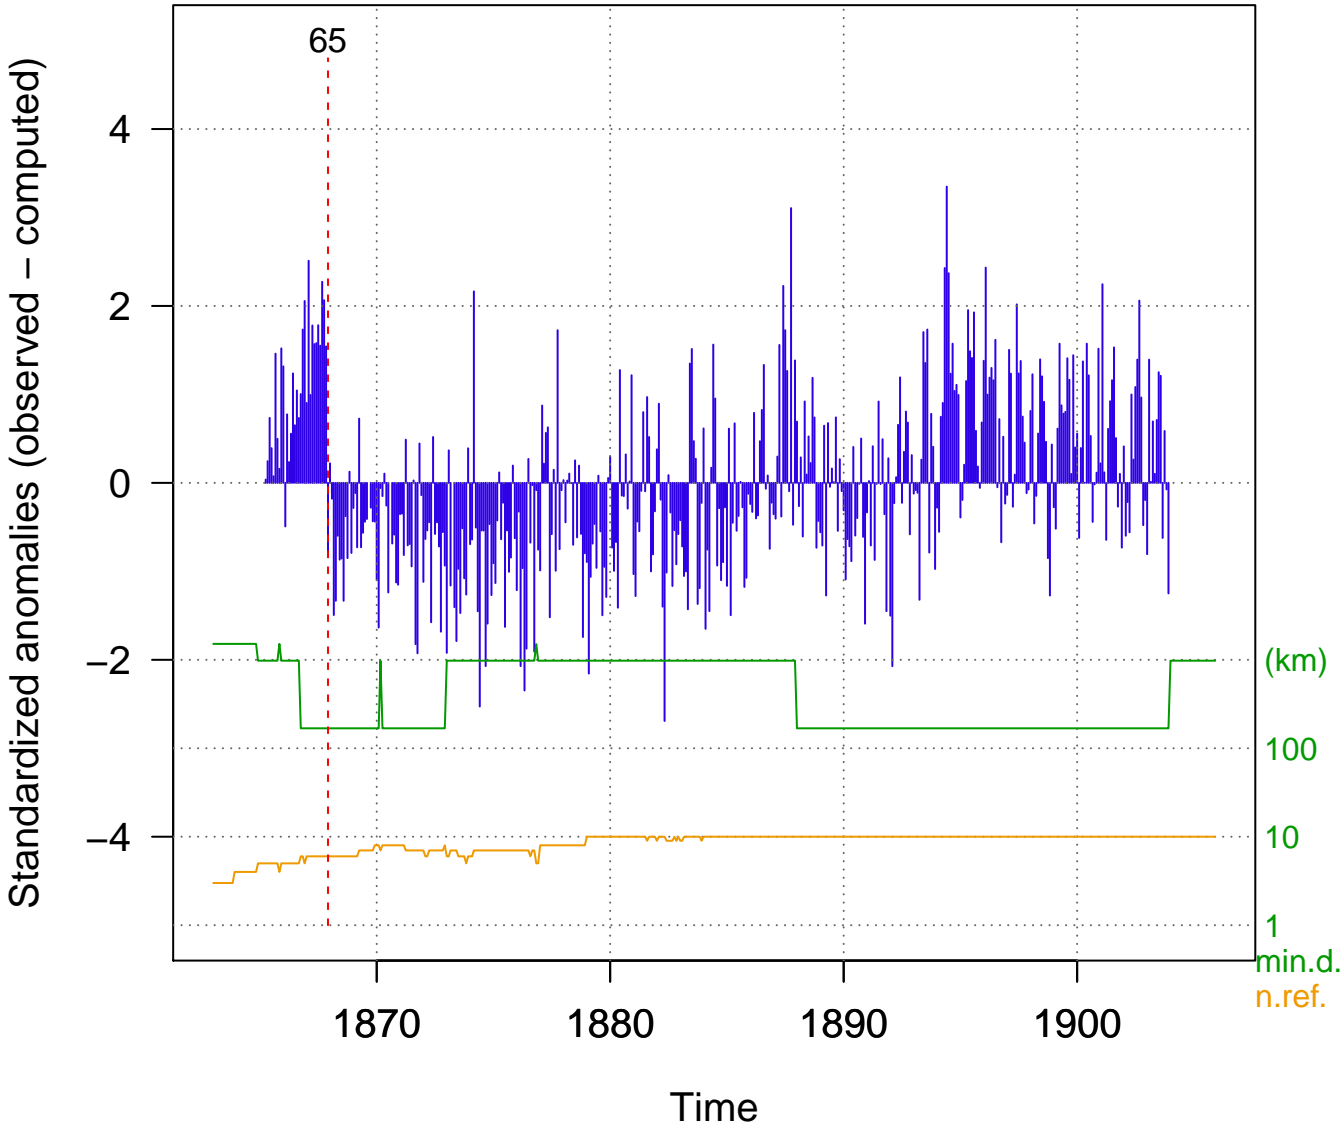

RH 3 (Porto)

Porto

Standardized anomalies (observed - computed)

63

4

2

0

-2

-4

(km)

100

10

1  
min.d.  
n.ref.

1870

1880

1890

1900

Time

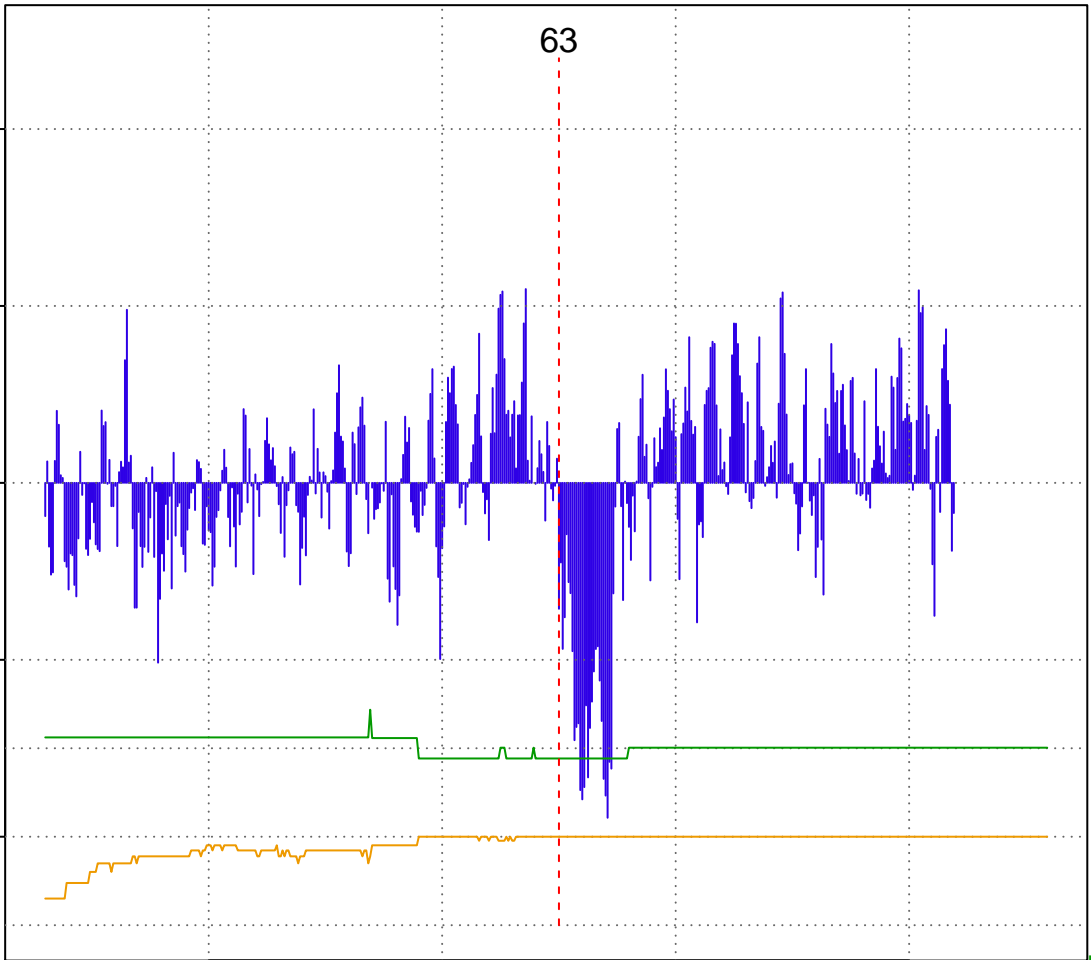

# RH 2 (Moncorvo) Moncorvo

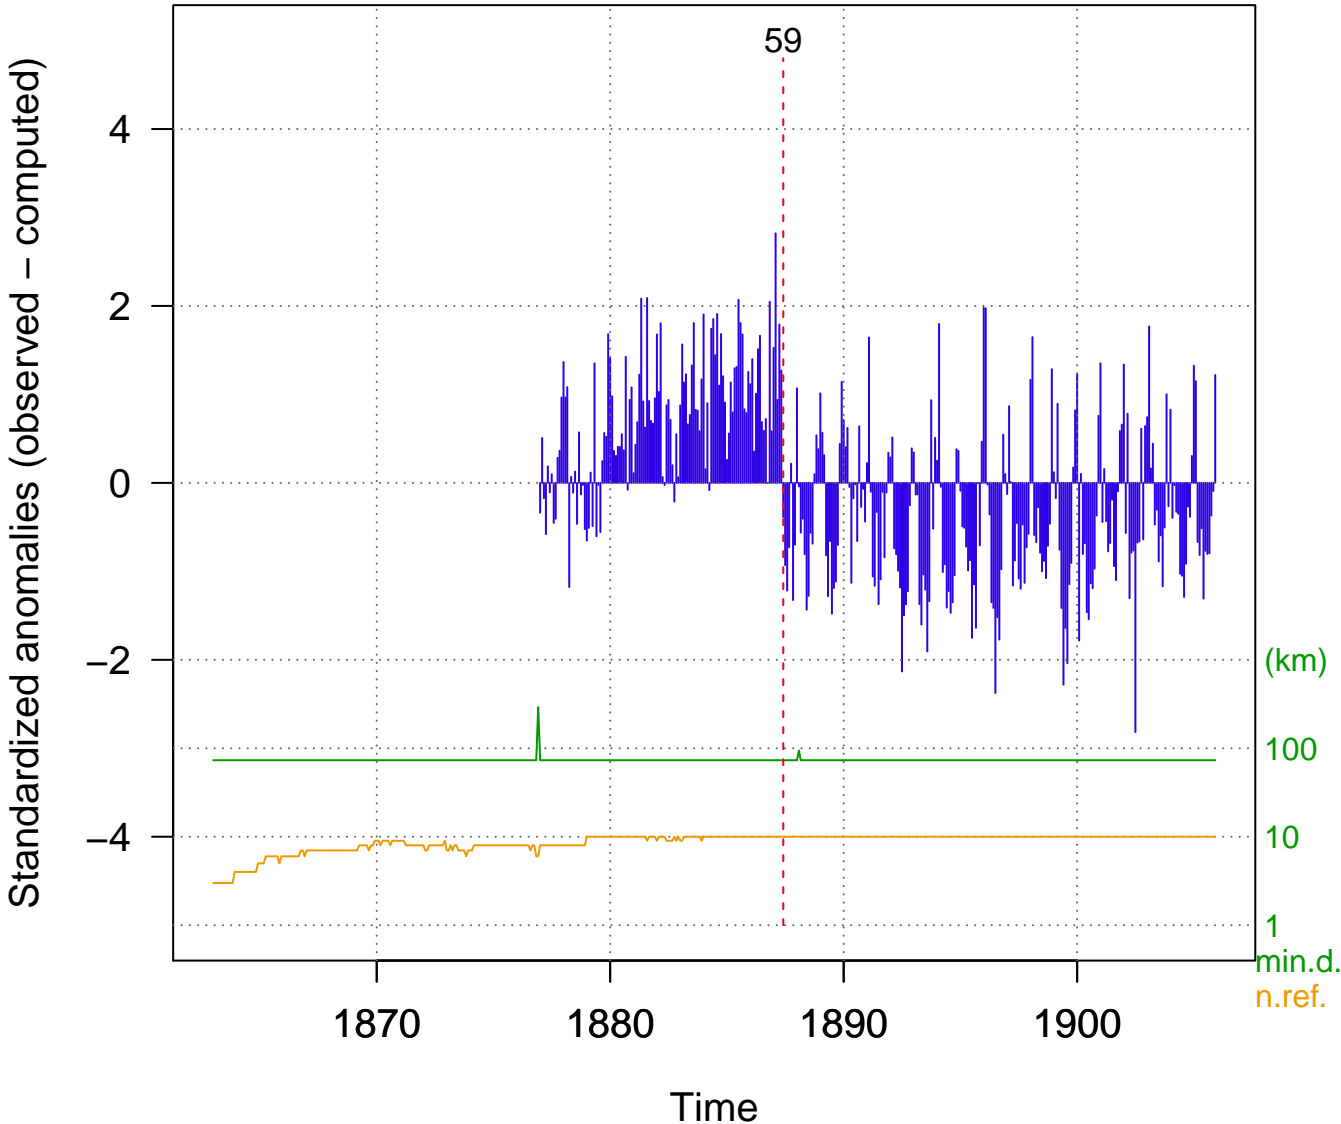

# RH 11 (Angra\_do\_Heroismo)

## Angra do Heroismo

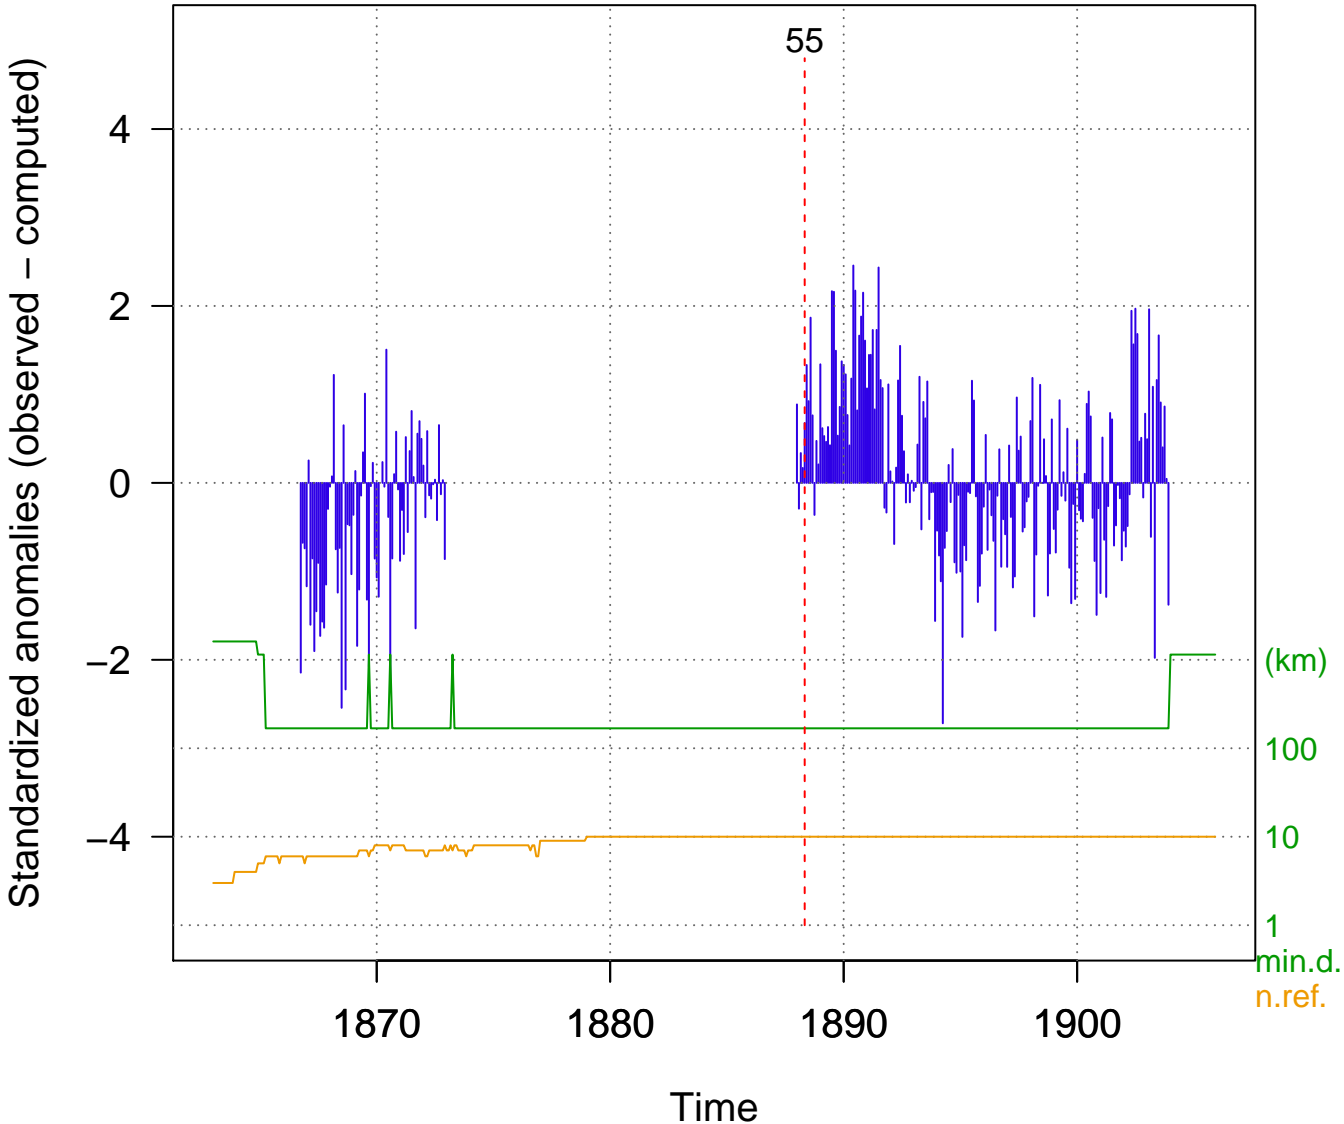



# RH 3 (Porto) Porto

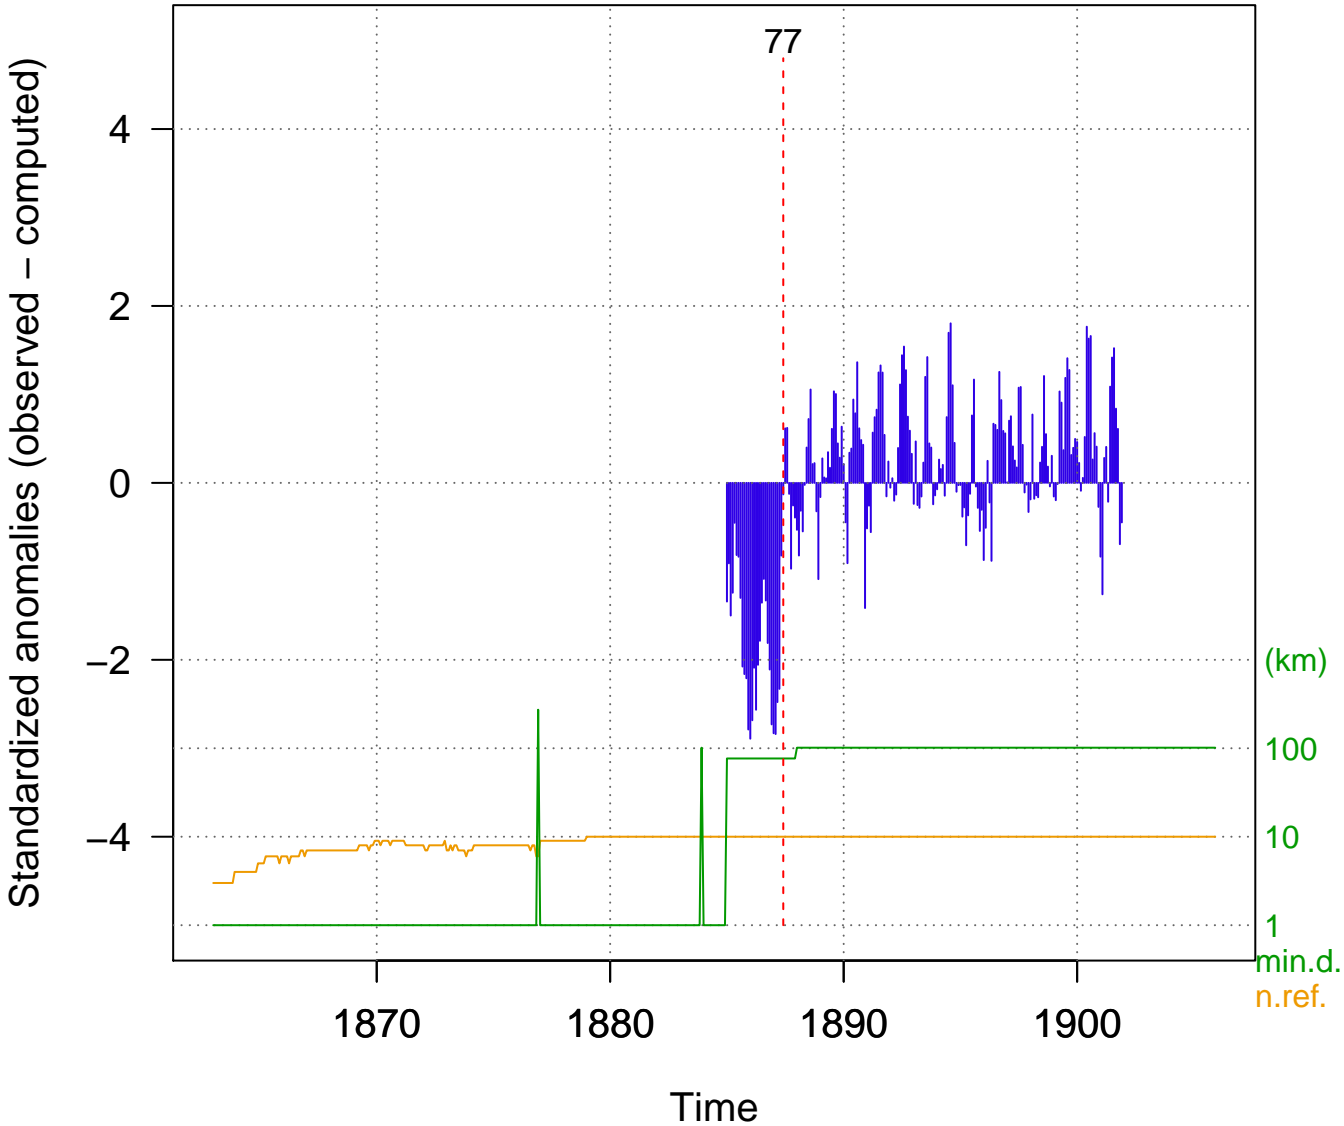

# RH 11 (Angra\_do\_Heroismo)

## Angra do Heroismo

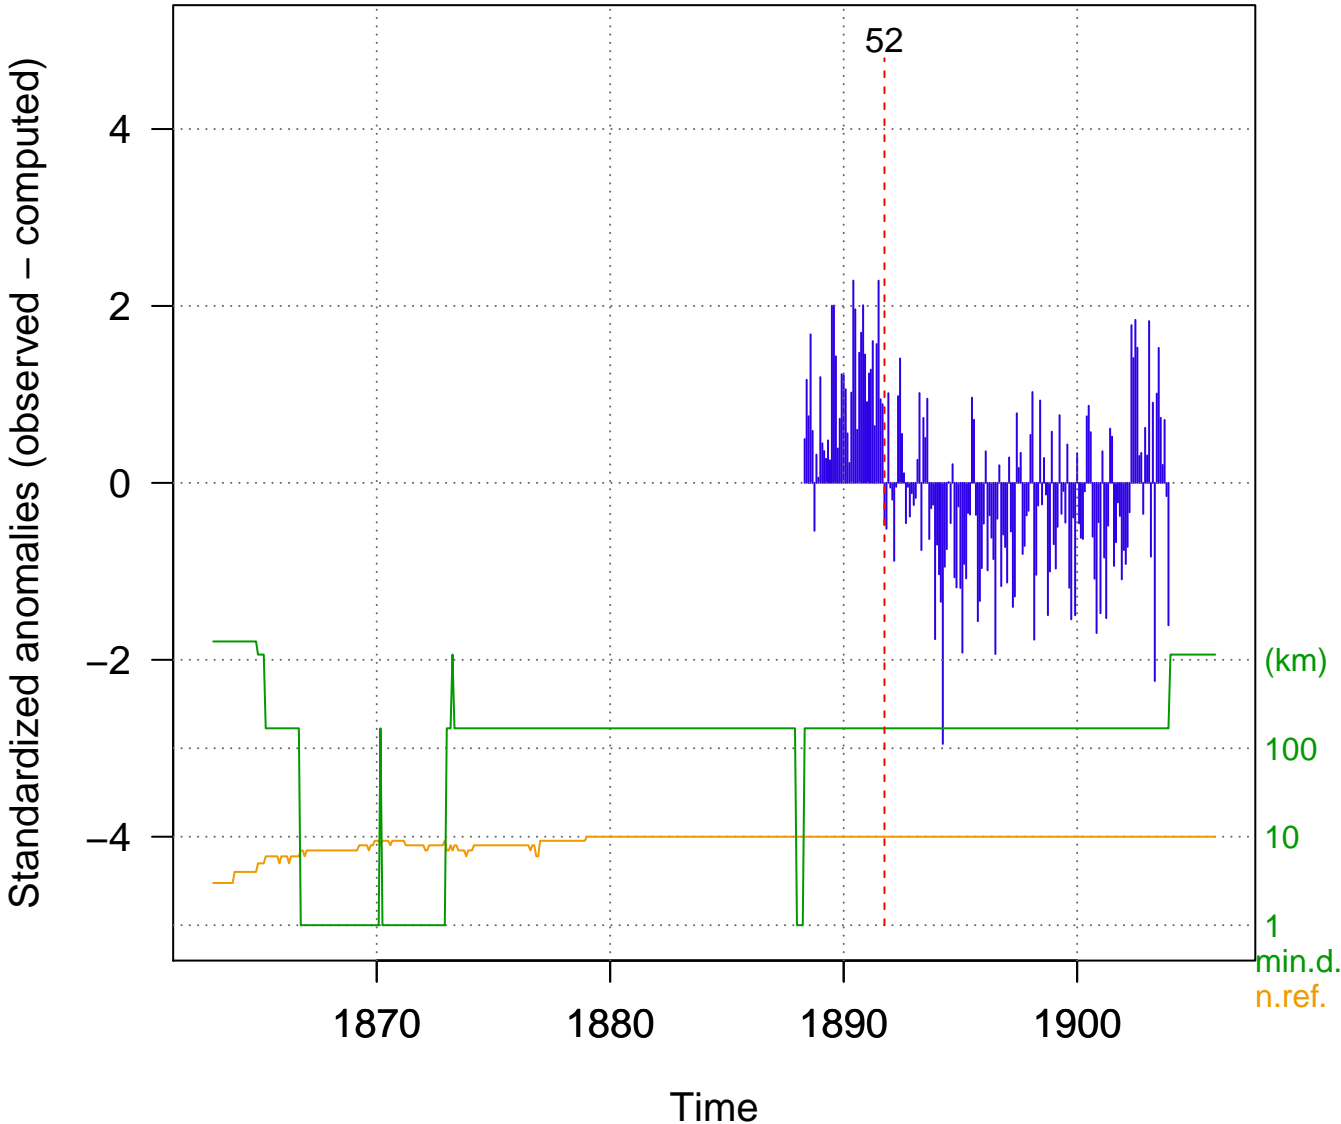

# RH 12 (Evora) Evora

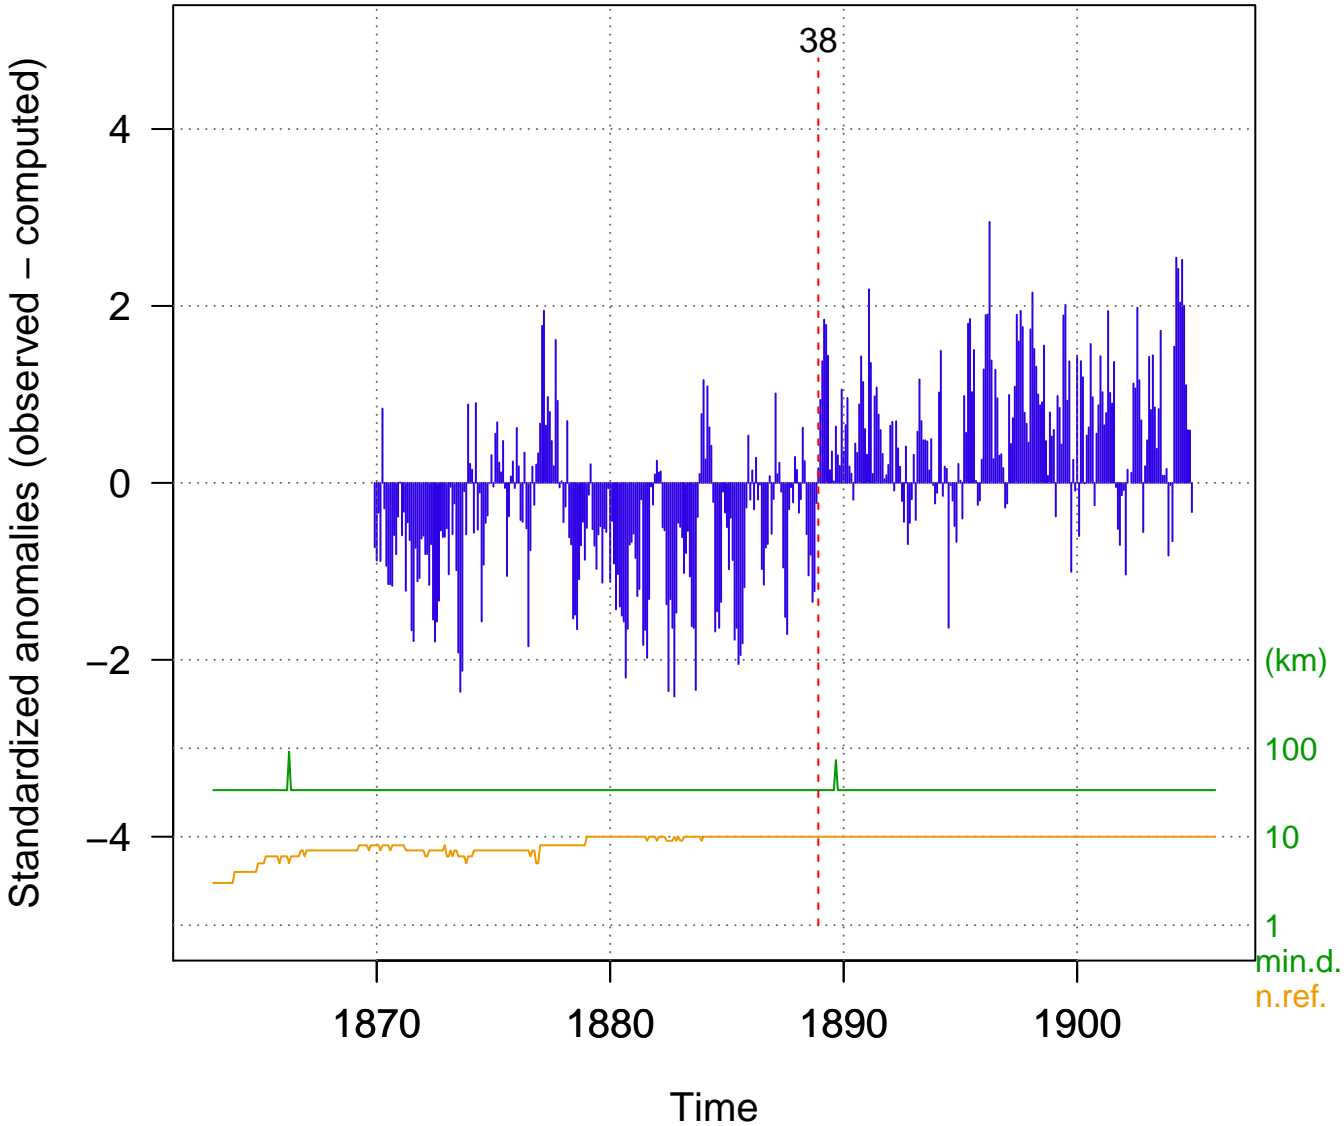

# RH 10 (Infante\_D\_Luiz)

## Lisbon Infante D. Luiz

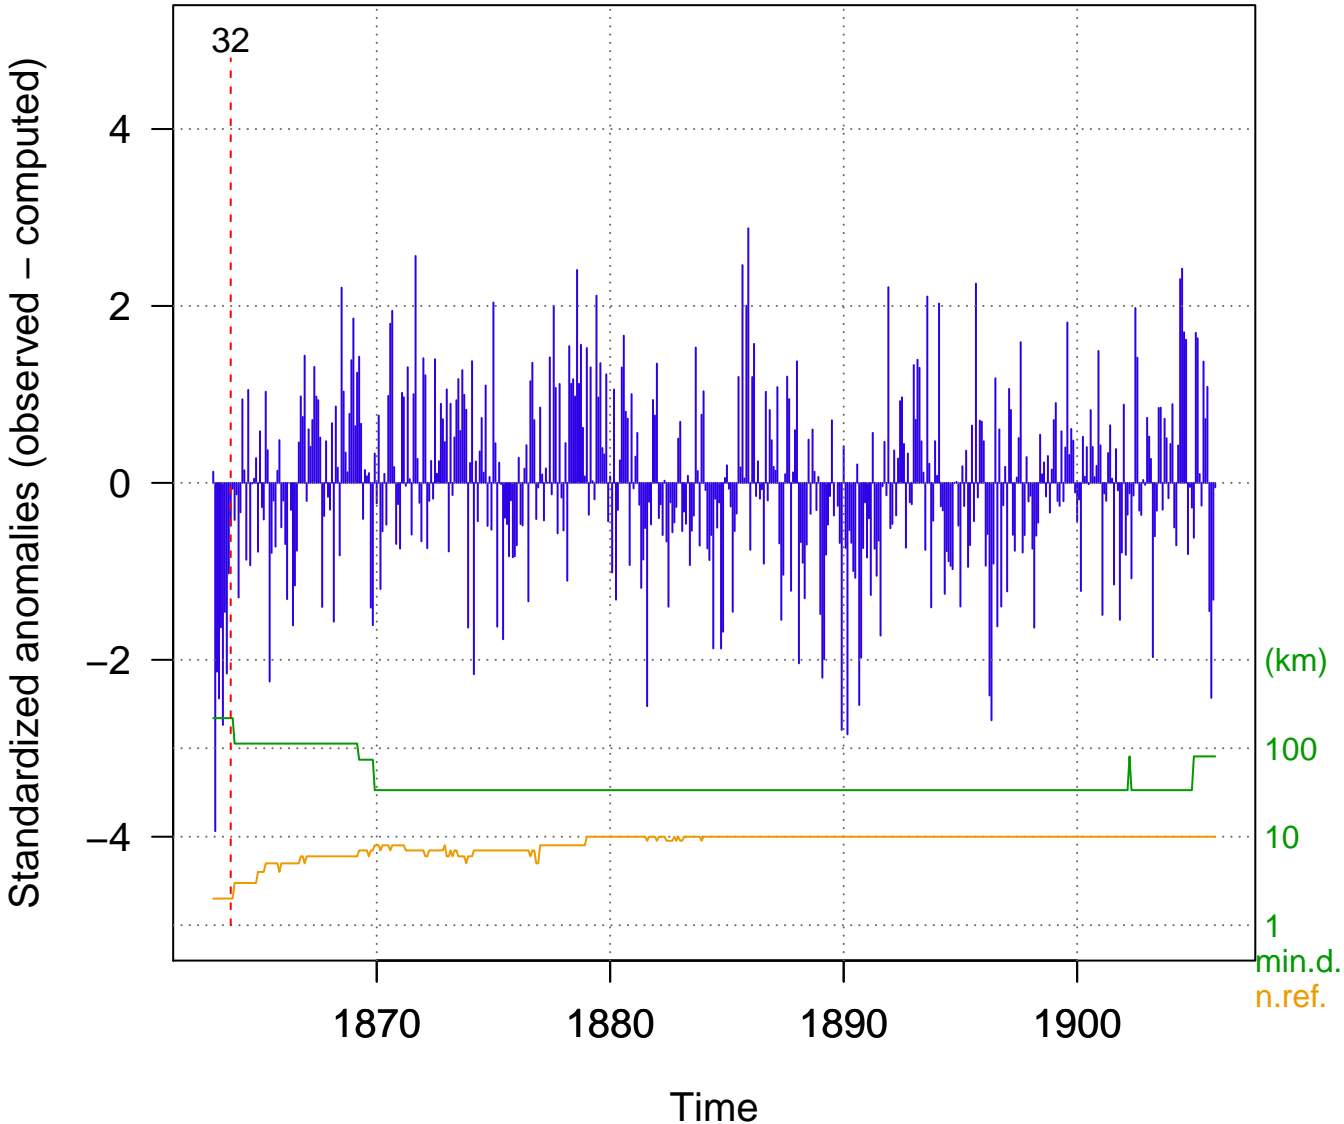

**RH 19 (S.\_Vicente)**  
**S. Vicente**

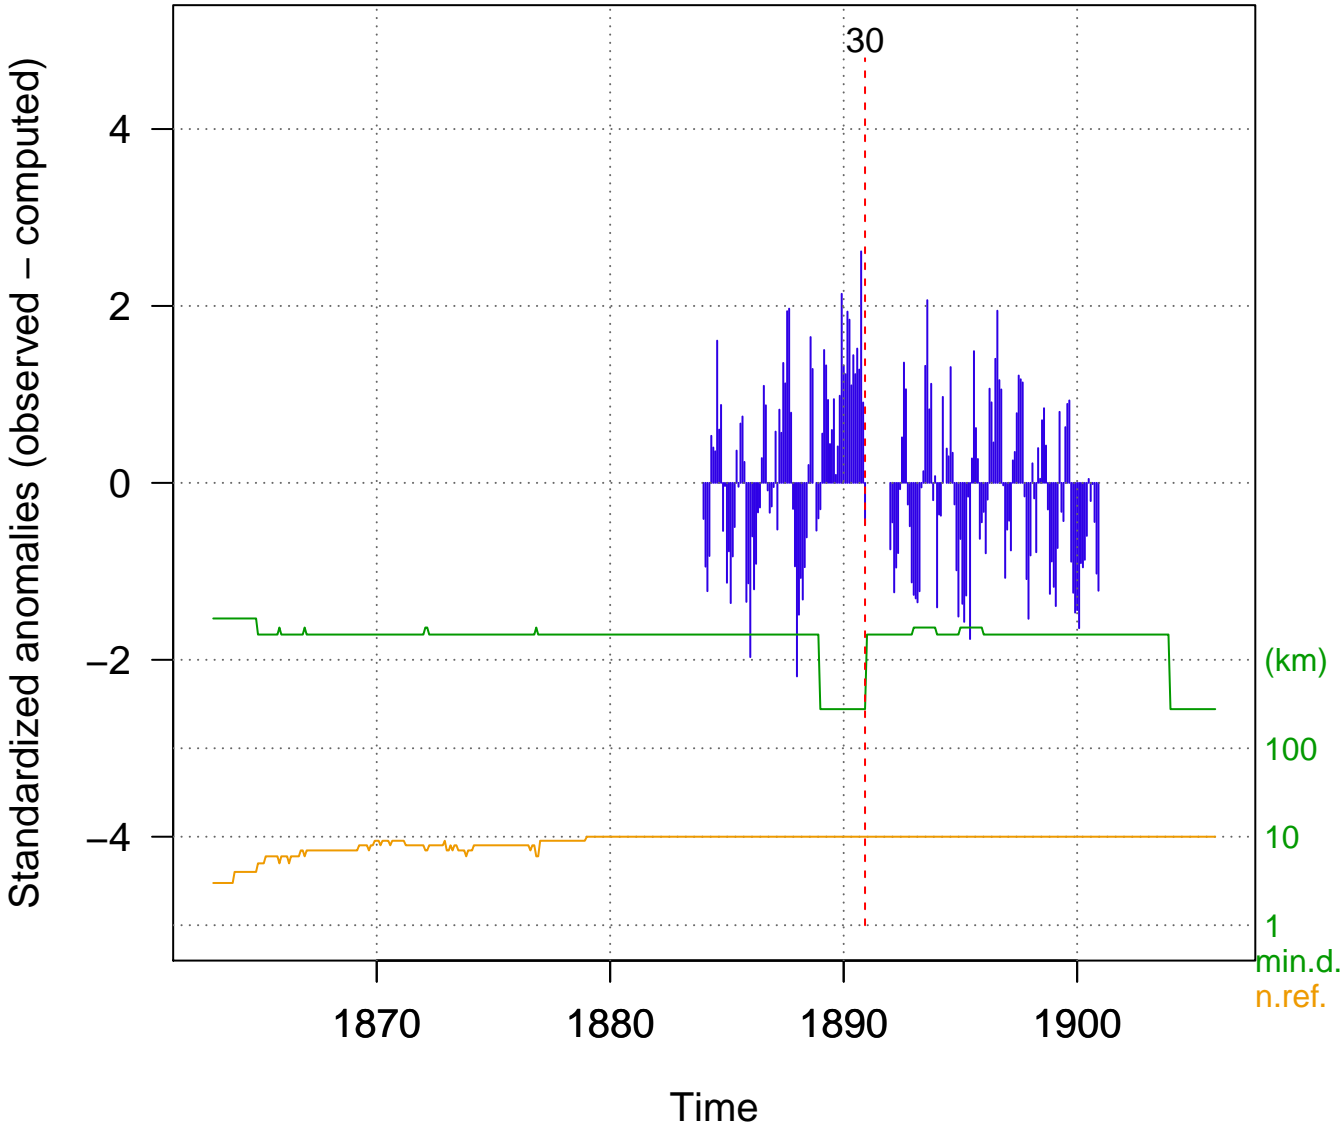

# RH 26 (Moncorvo-2) Moncorvo-2

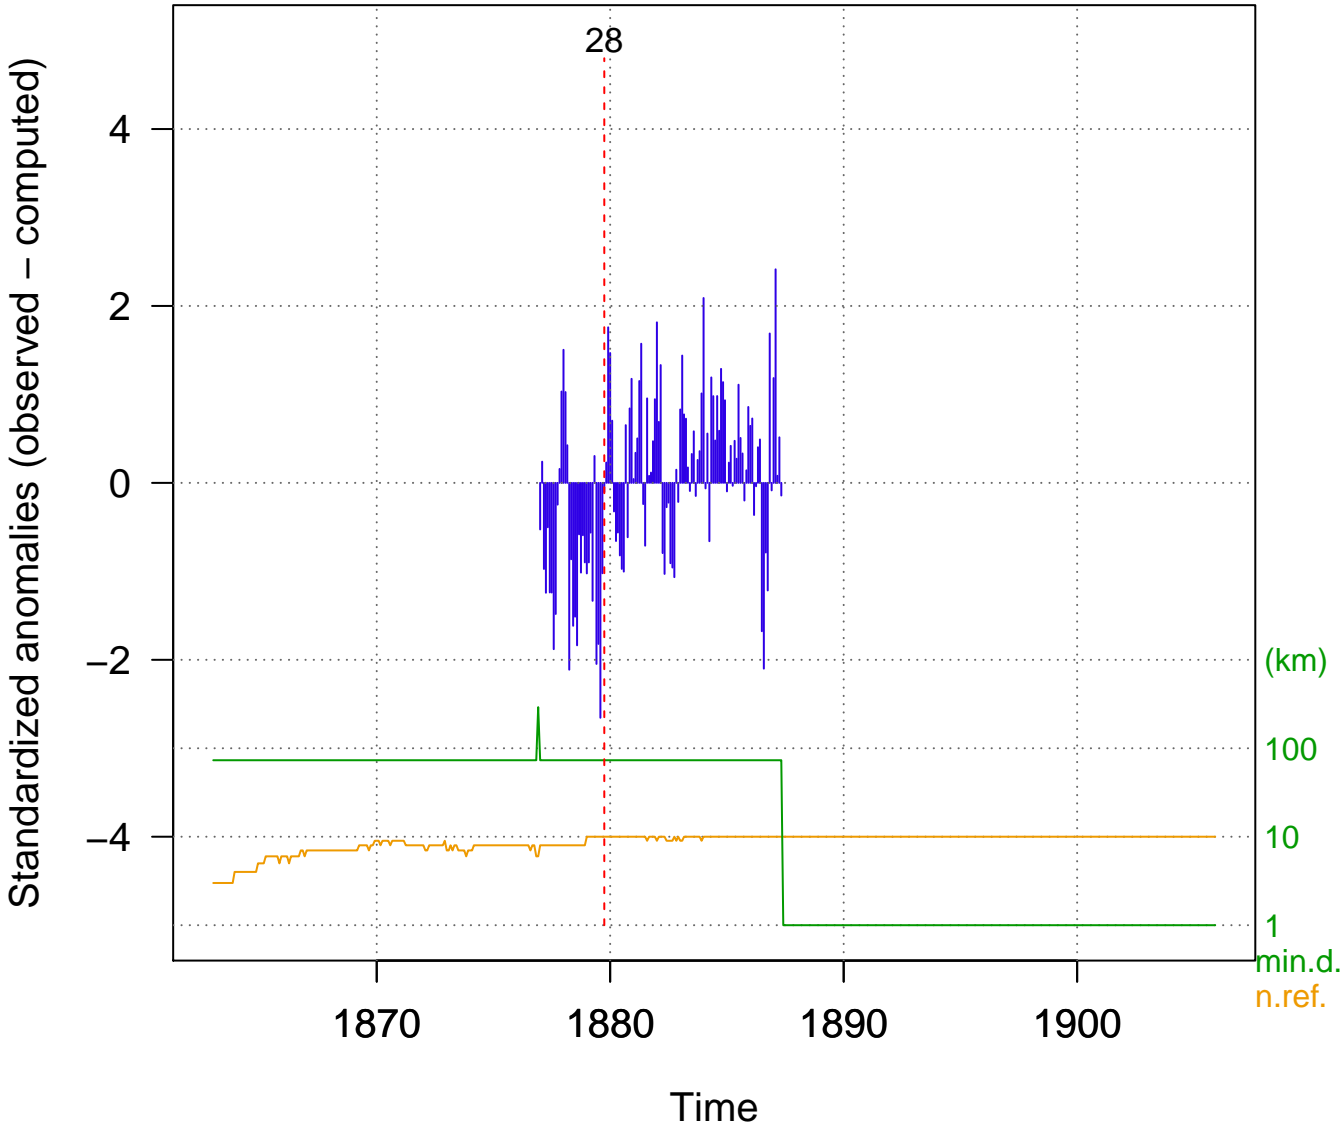

# RH 15 (Ponta\_Delgada)

## Ponta Delgada

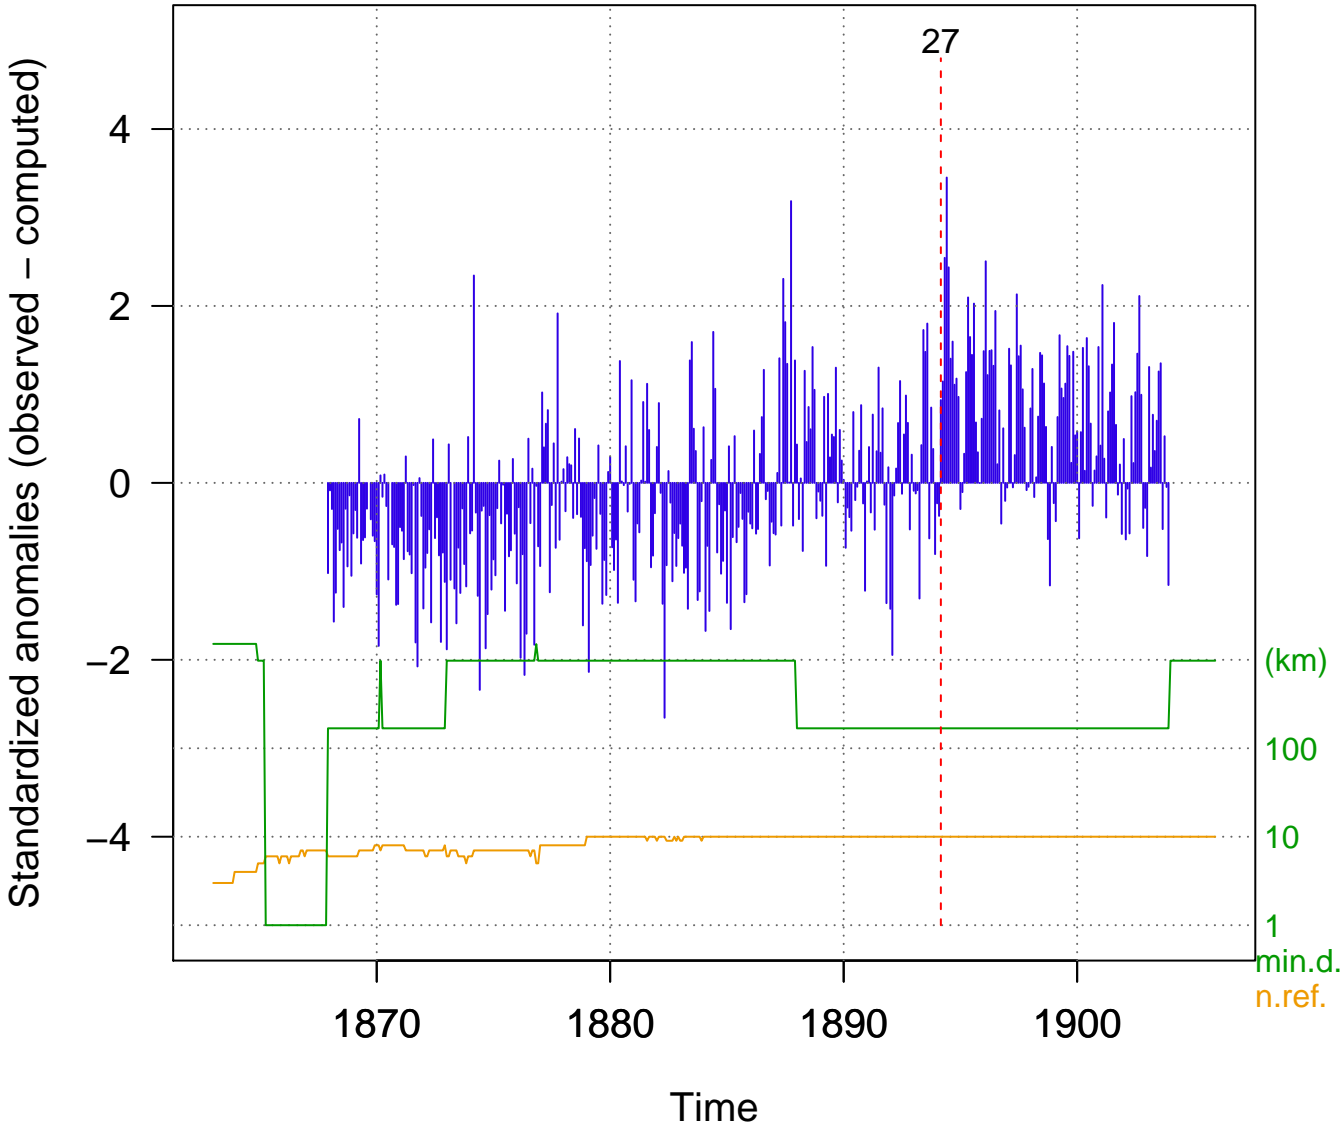

# RH 25 (Porto-2) Porto-2

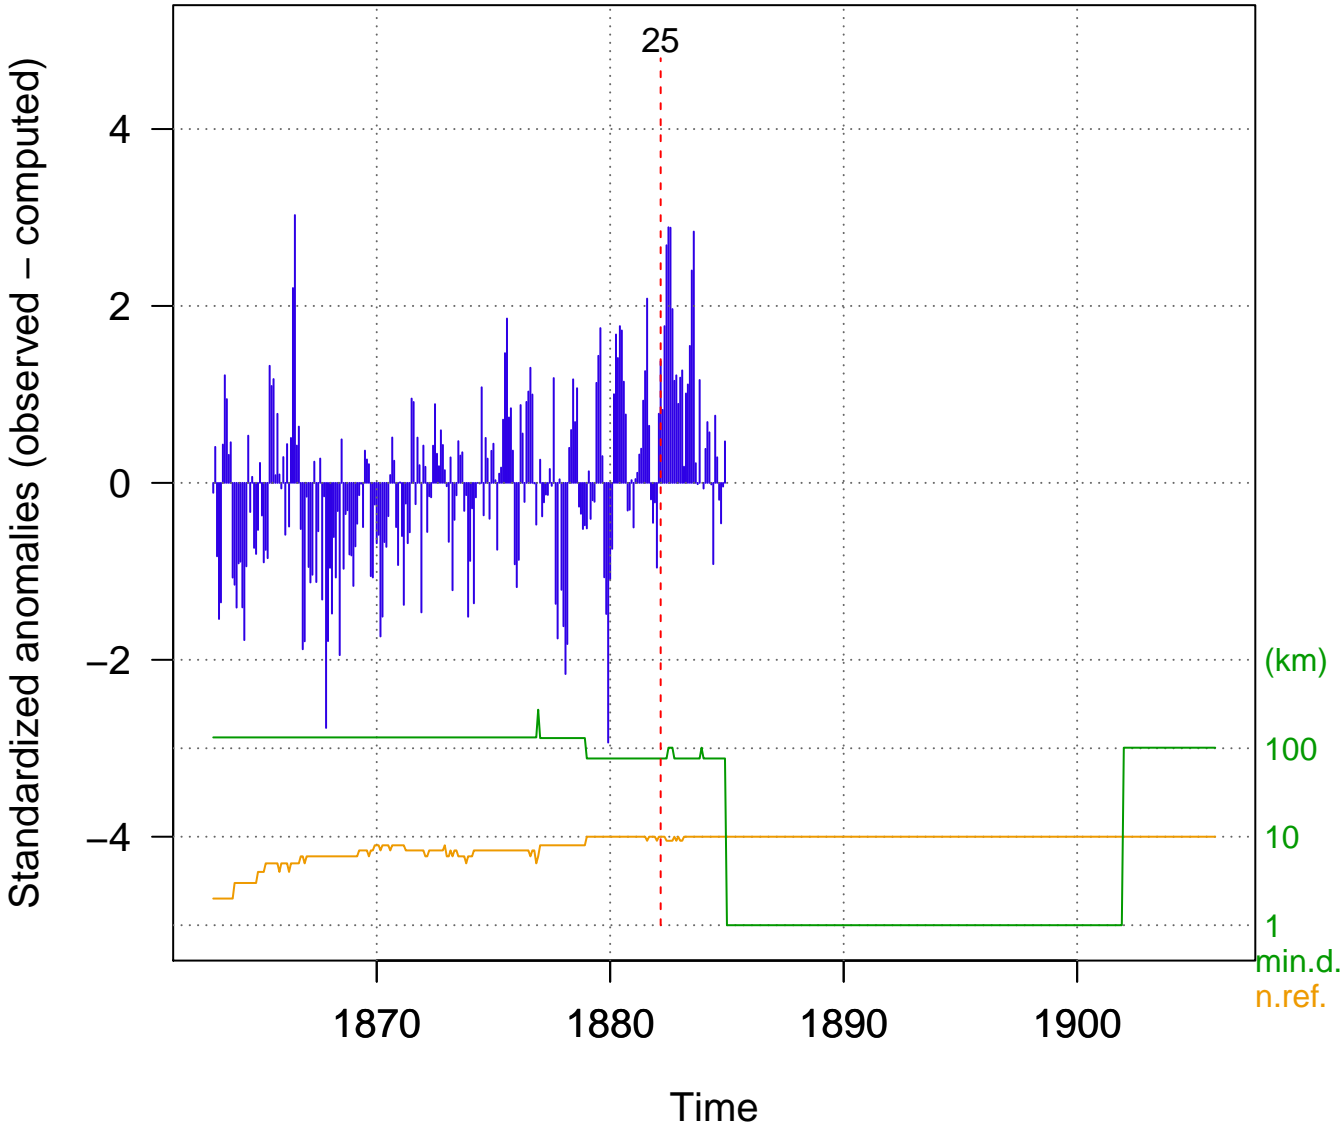



# RH 9 (Campo\_Maior) Campo Maior

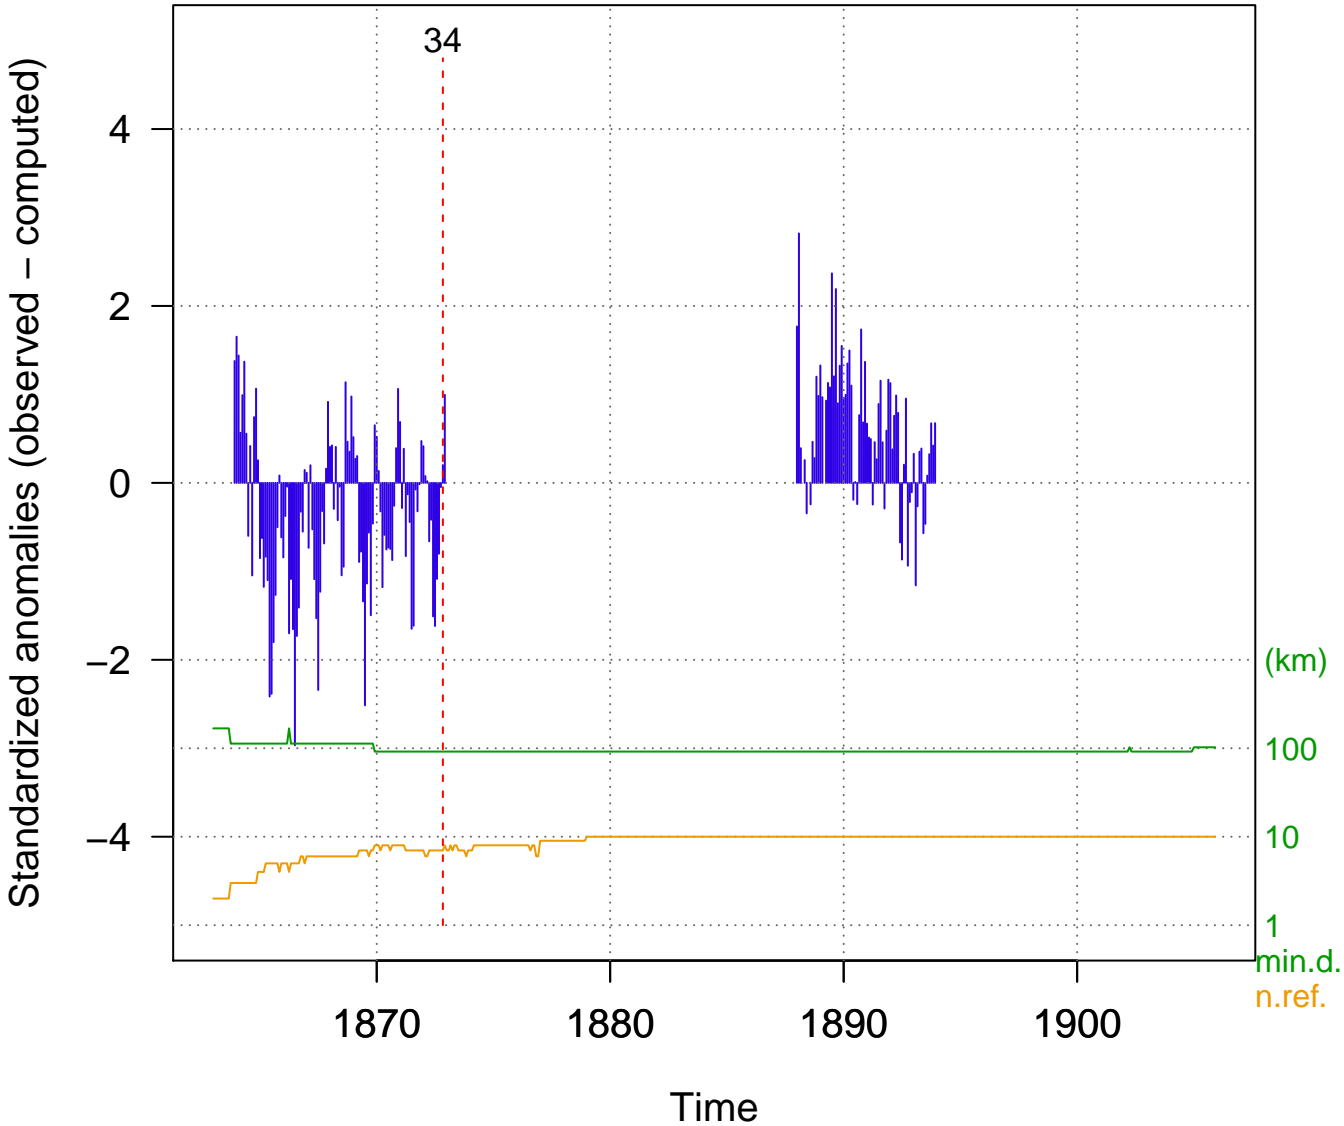

# RH 30 (Evora-2) Evora-2

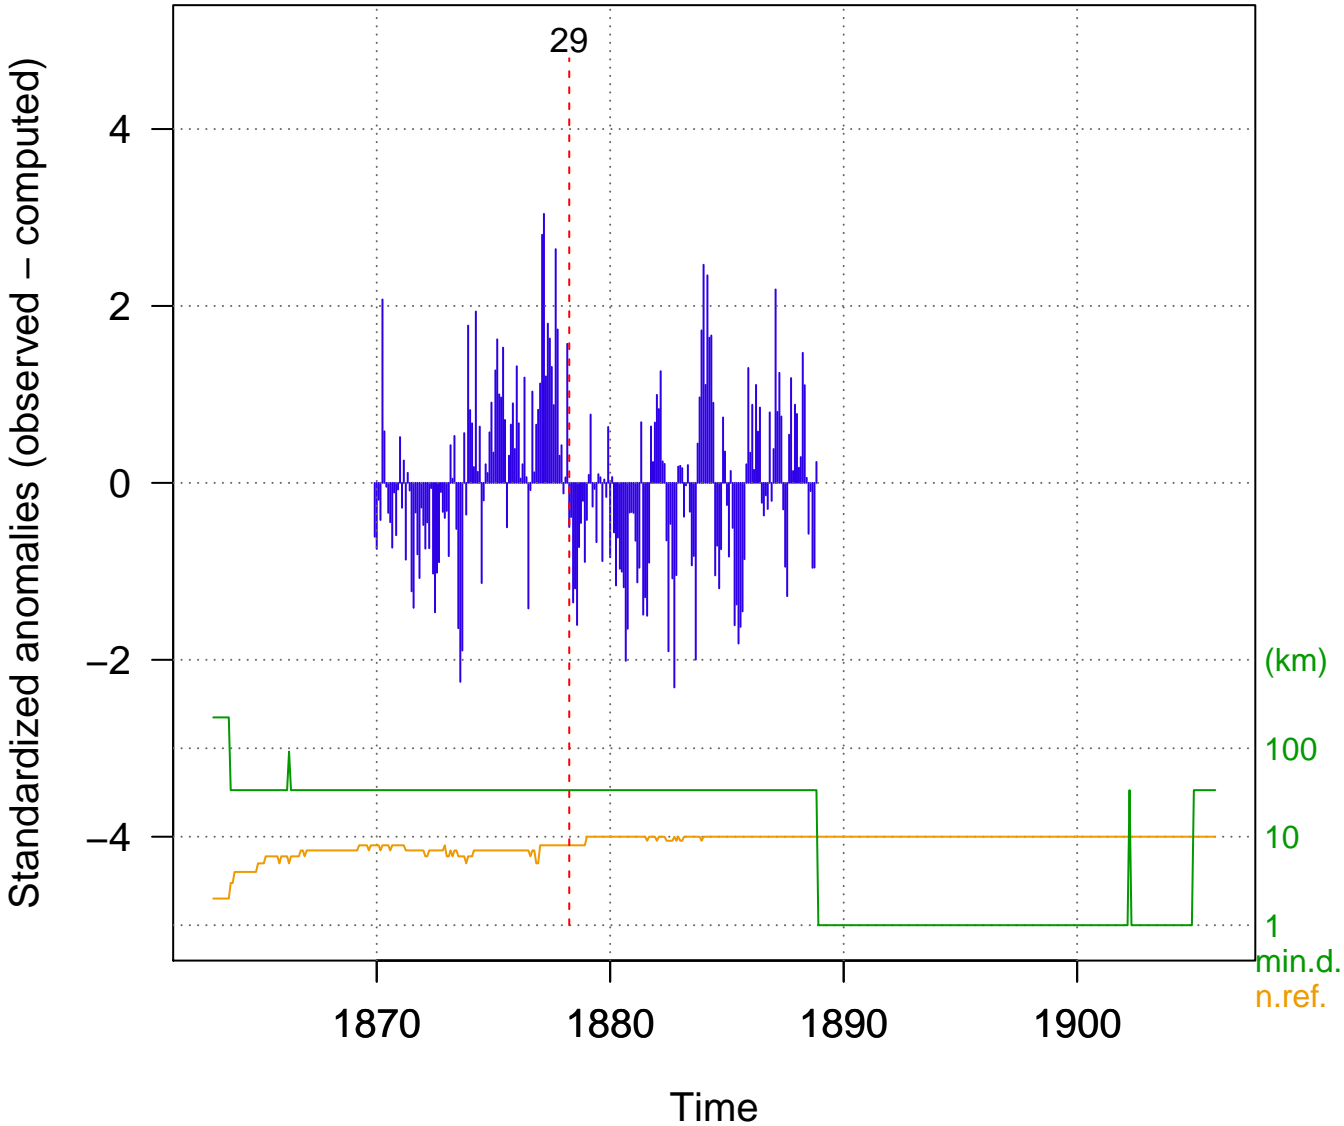

**Histogram of maximum SNHT (Stage 1)**

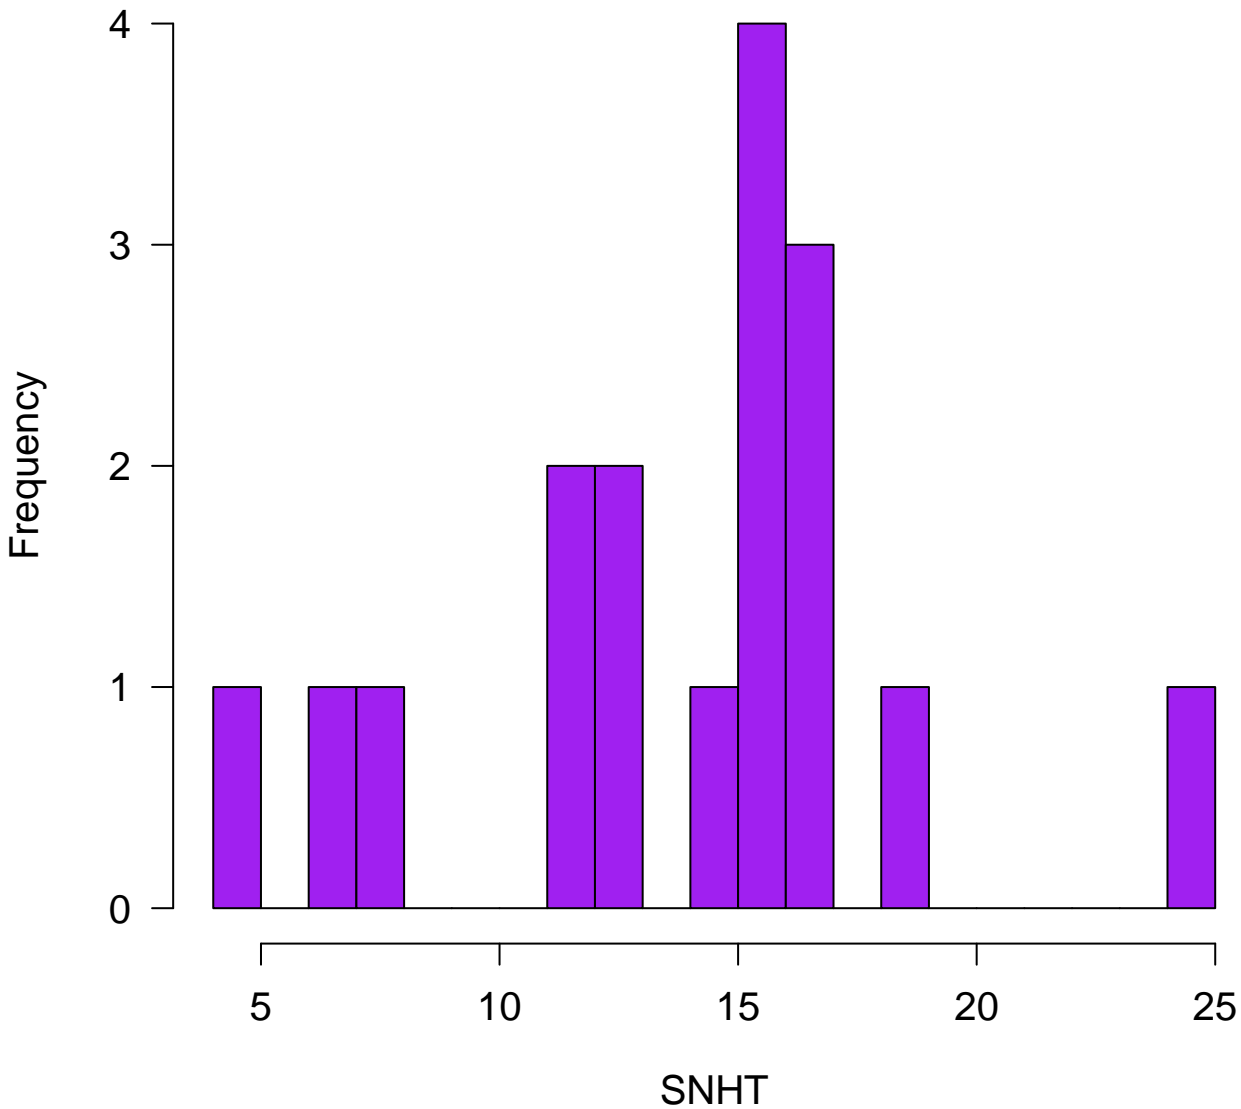

# Stage 2

Binary splits on  
whole series with  
 $\text{std}=3$ ,  $\text{SNHT}>25$   
and  $\text{wd}=1000$  km

# RH 18 (Funchal) Funchal

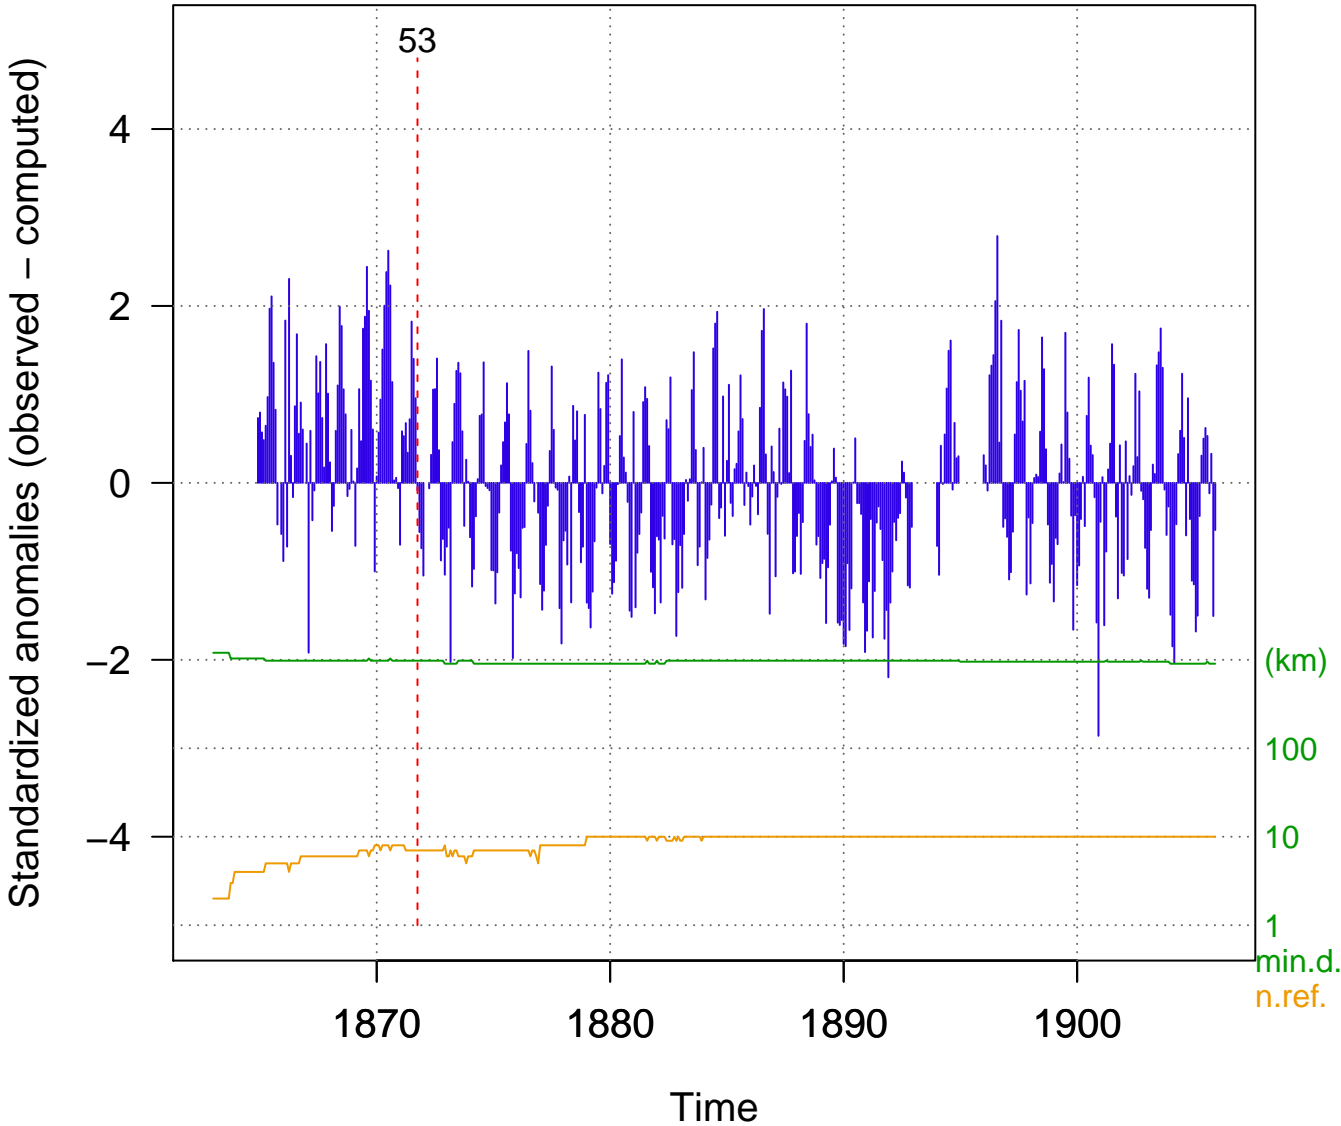

# RH 33 (Ponta\_Delgada-3) Ponta Delgada-3

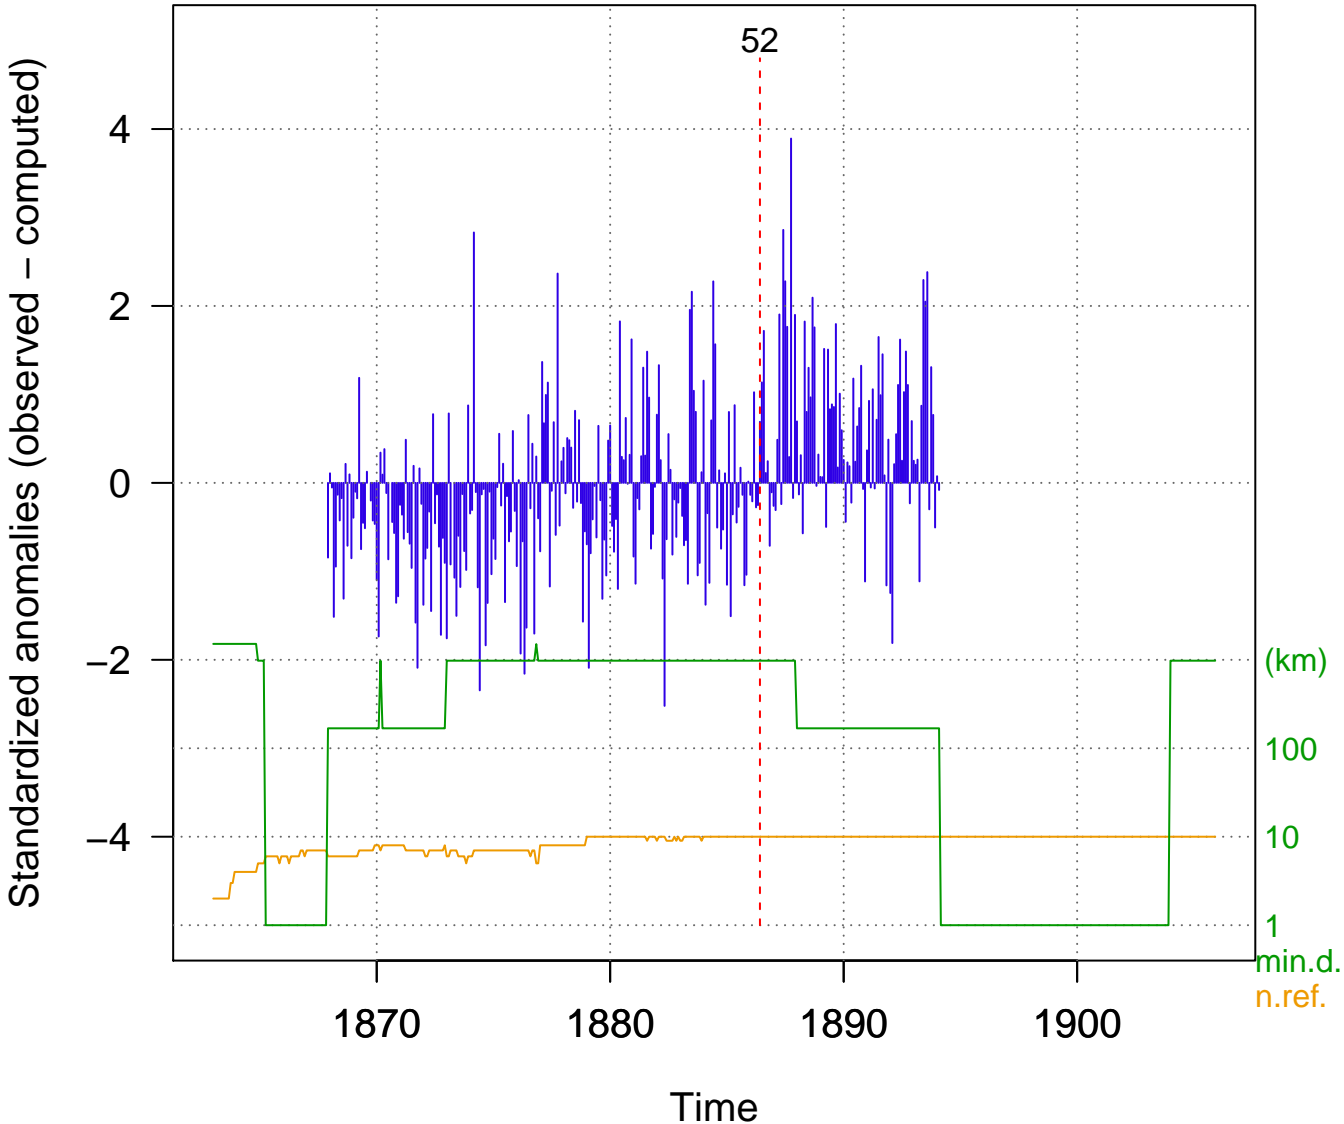

# RH 36 (Evora-3) Evora-3

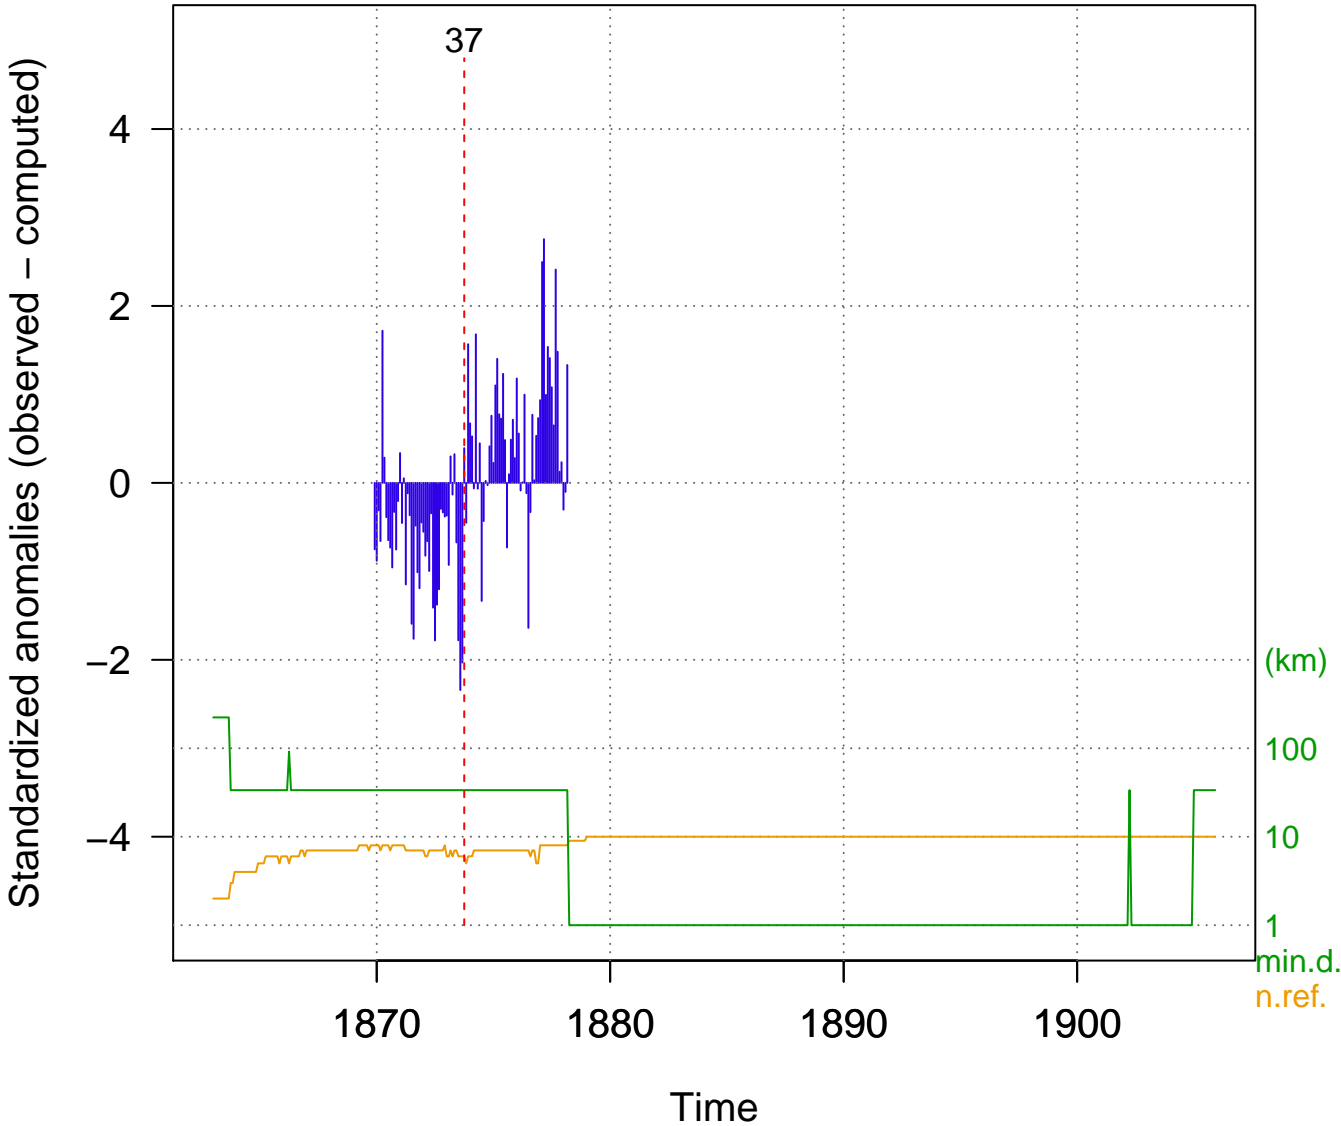

# RH 13 (Villa\_Fernando)

## Villa Fernando

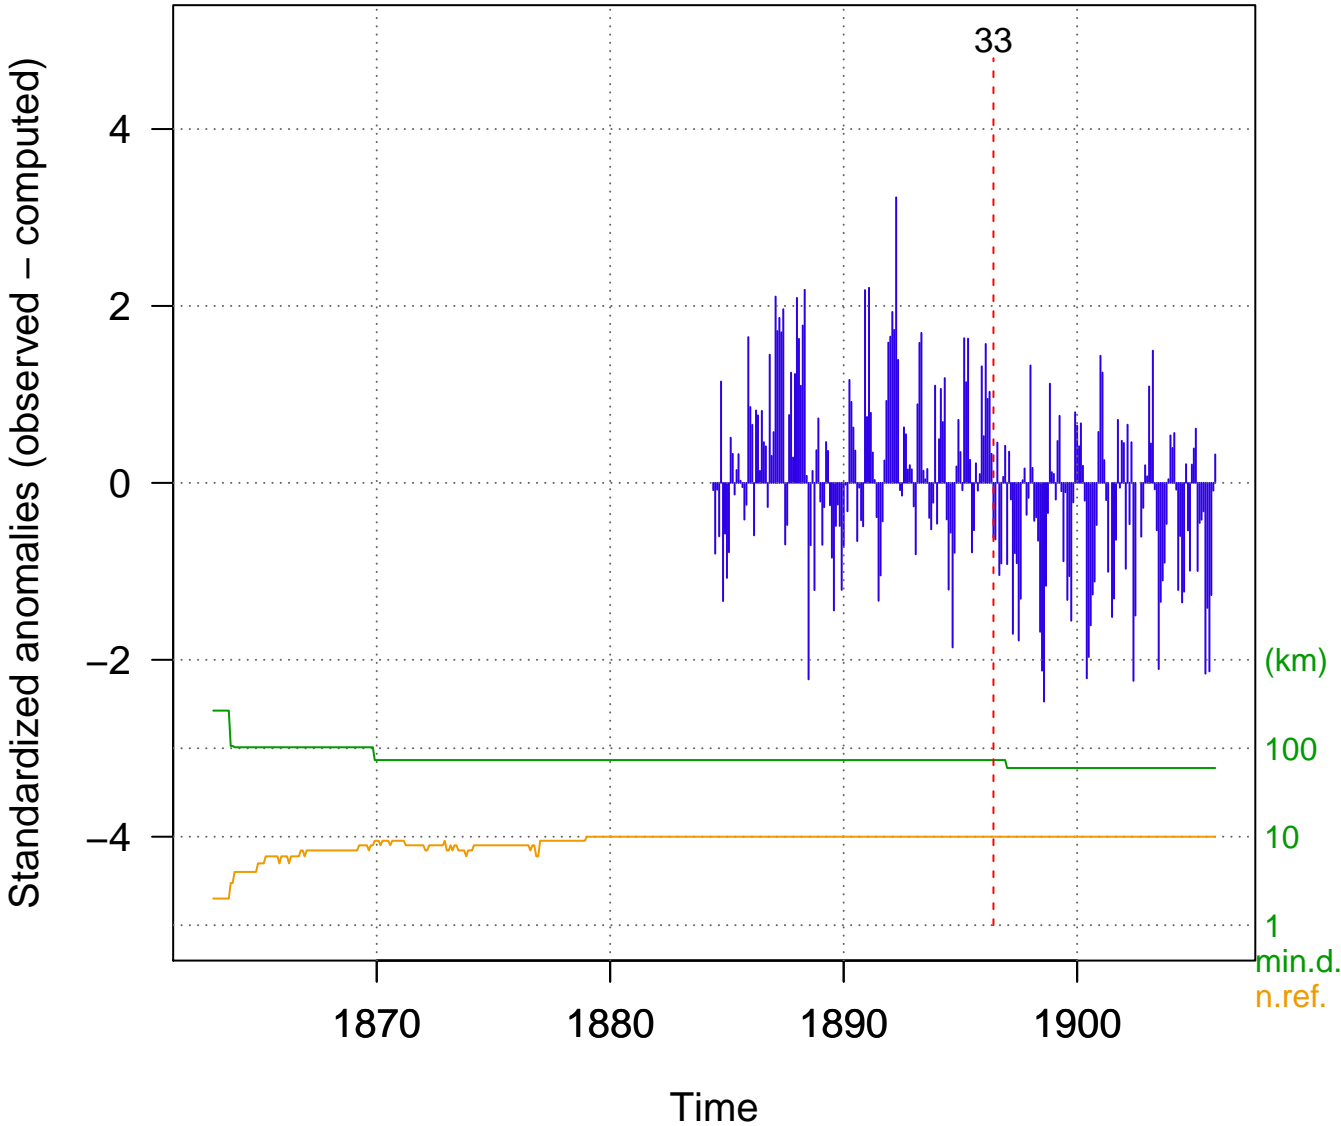



# RH 31 (S.\_Vicente-2) S. Vicente-2

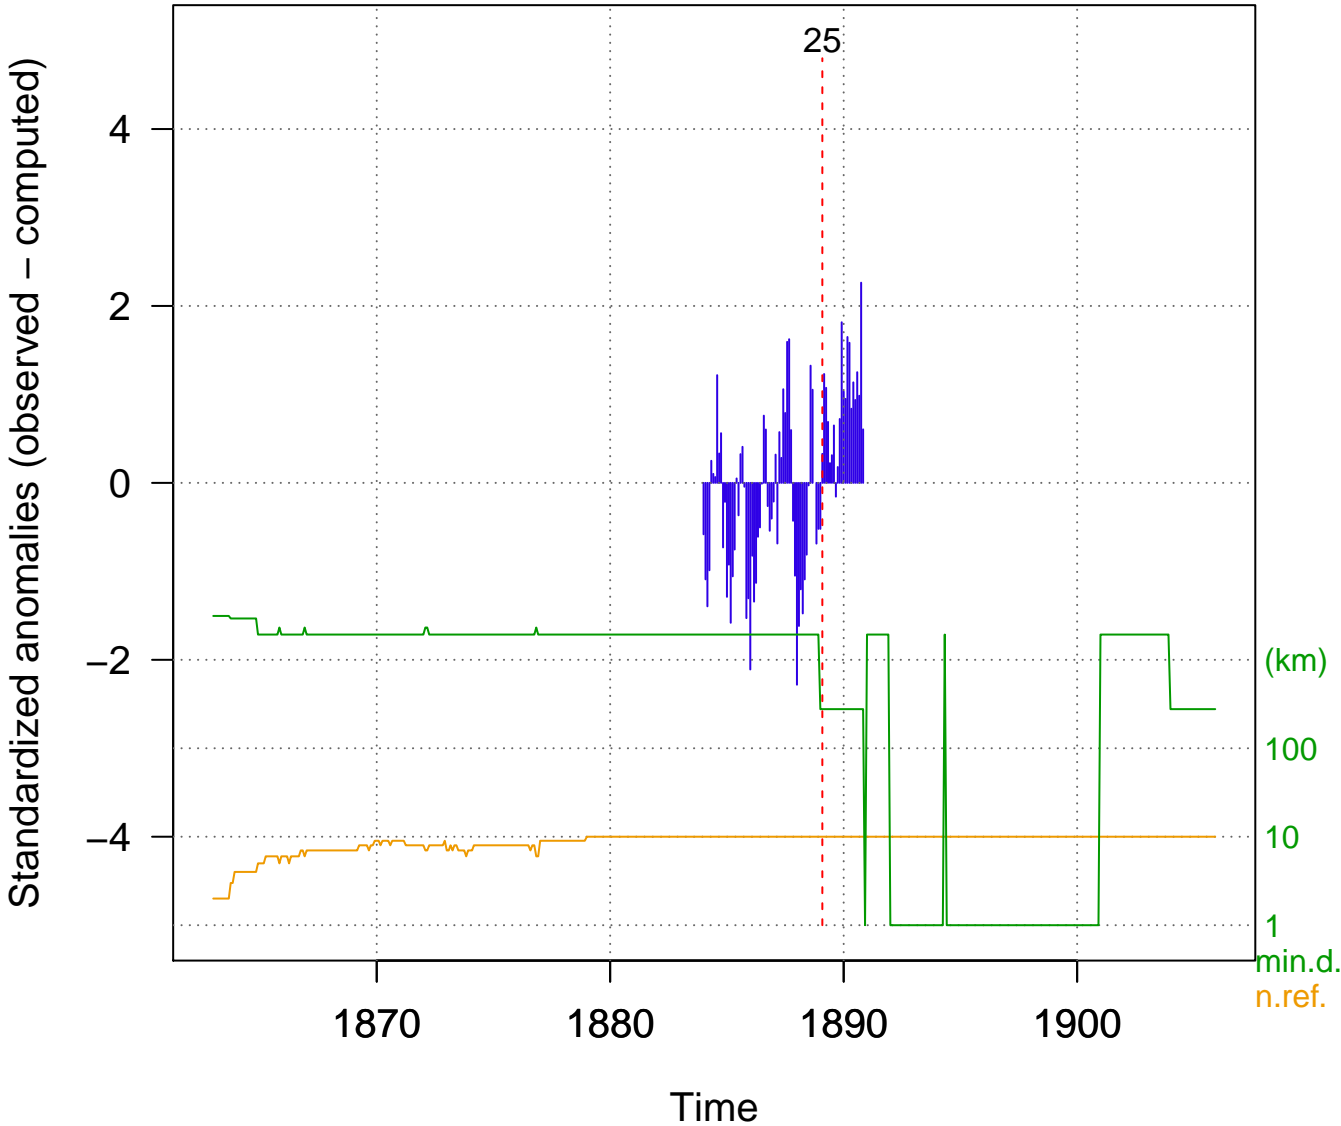

**Histogram of maximum SNHT (Stage 2)**

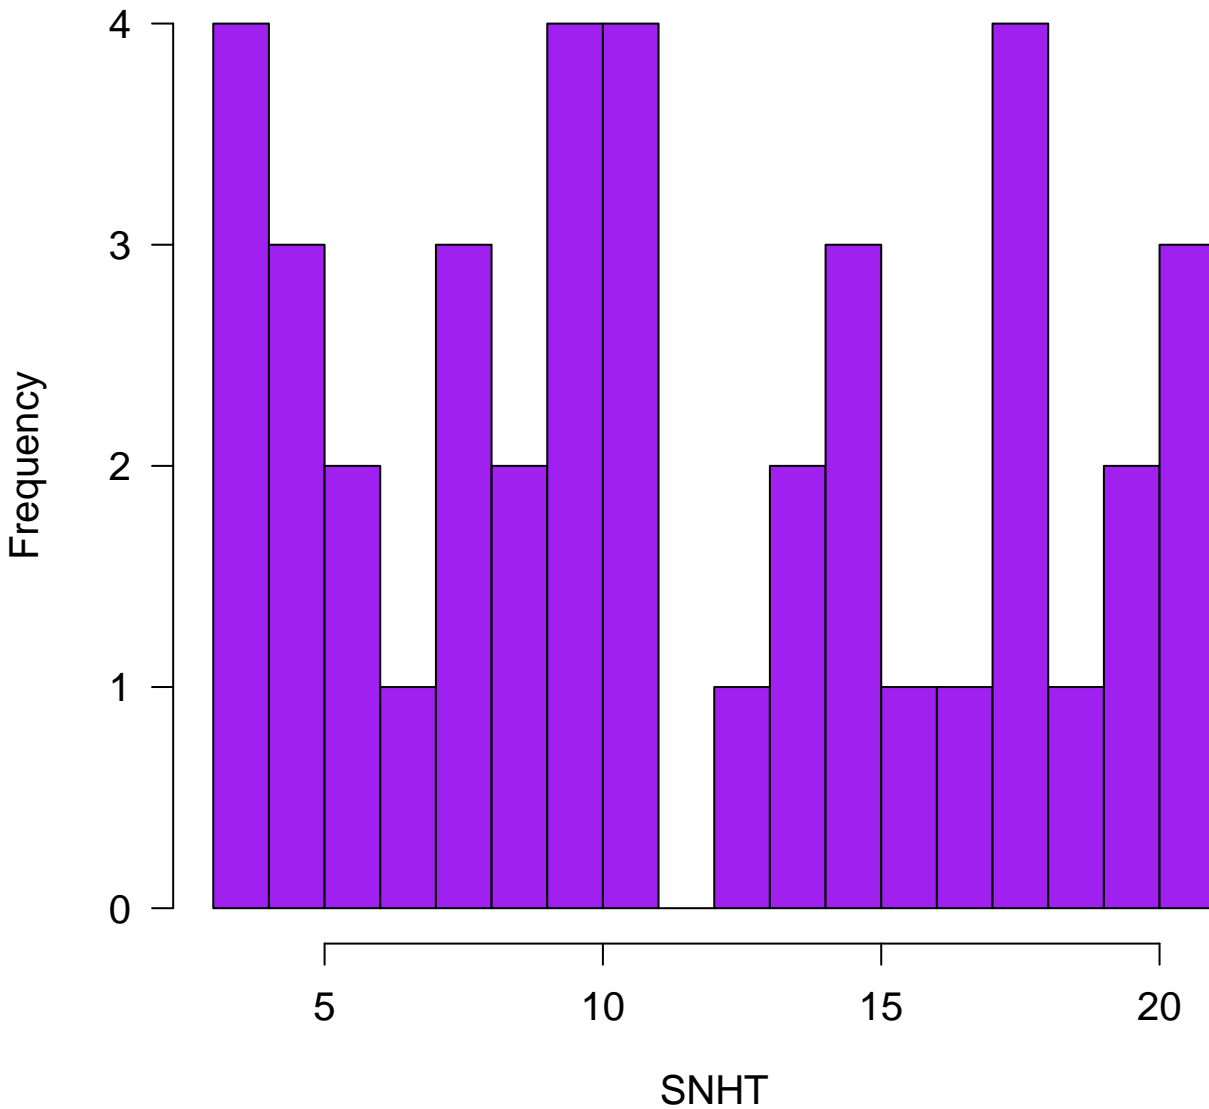

**Number of splits per station**

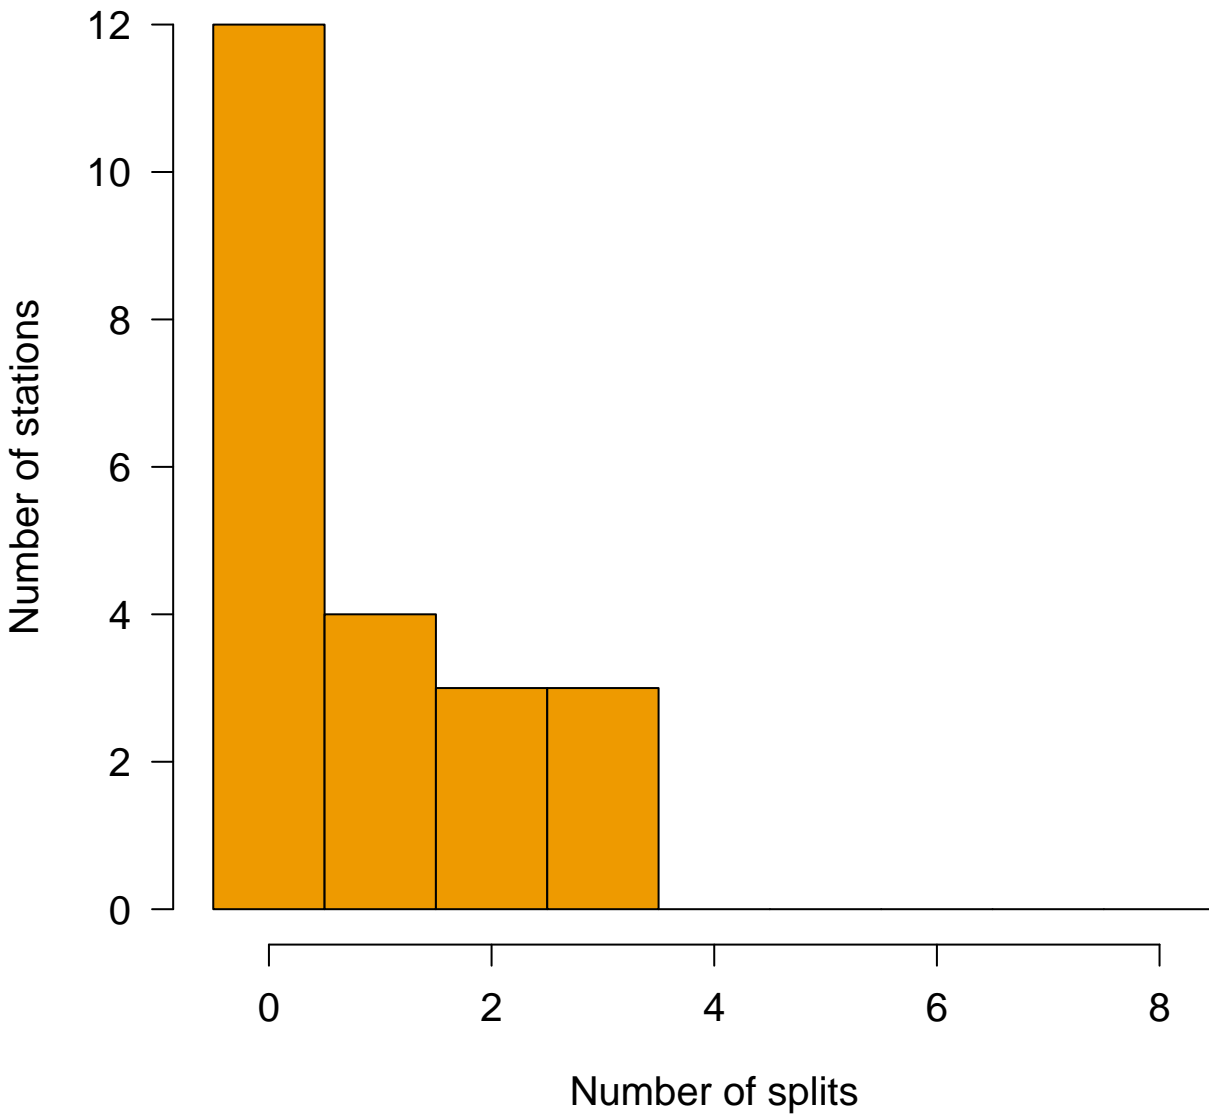

# Number of splits per year

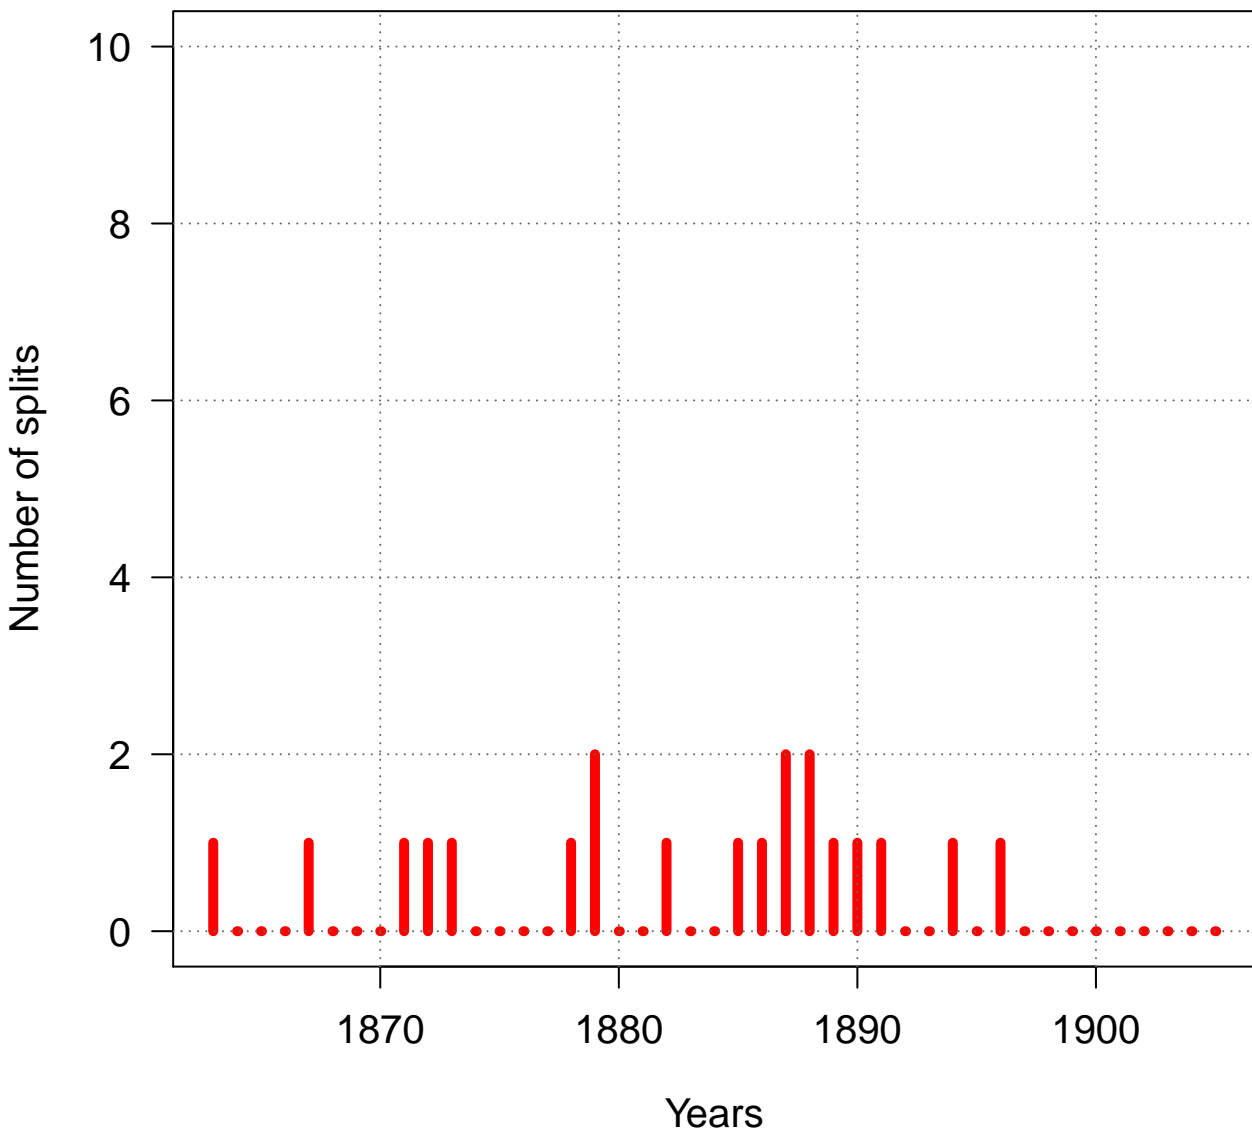

# Stage 3

Final anomalies of the  
homogenized series with  
 $wd = 100$  km and  $nref = 4$

# RH 1 (Montalegre) Montalegre

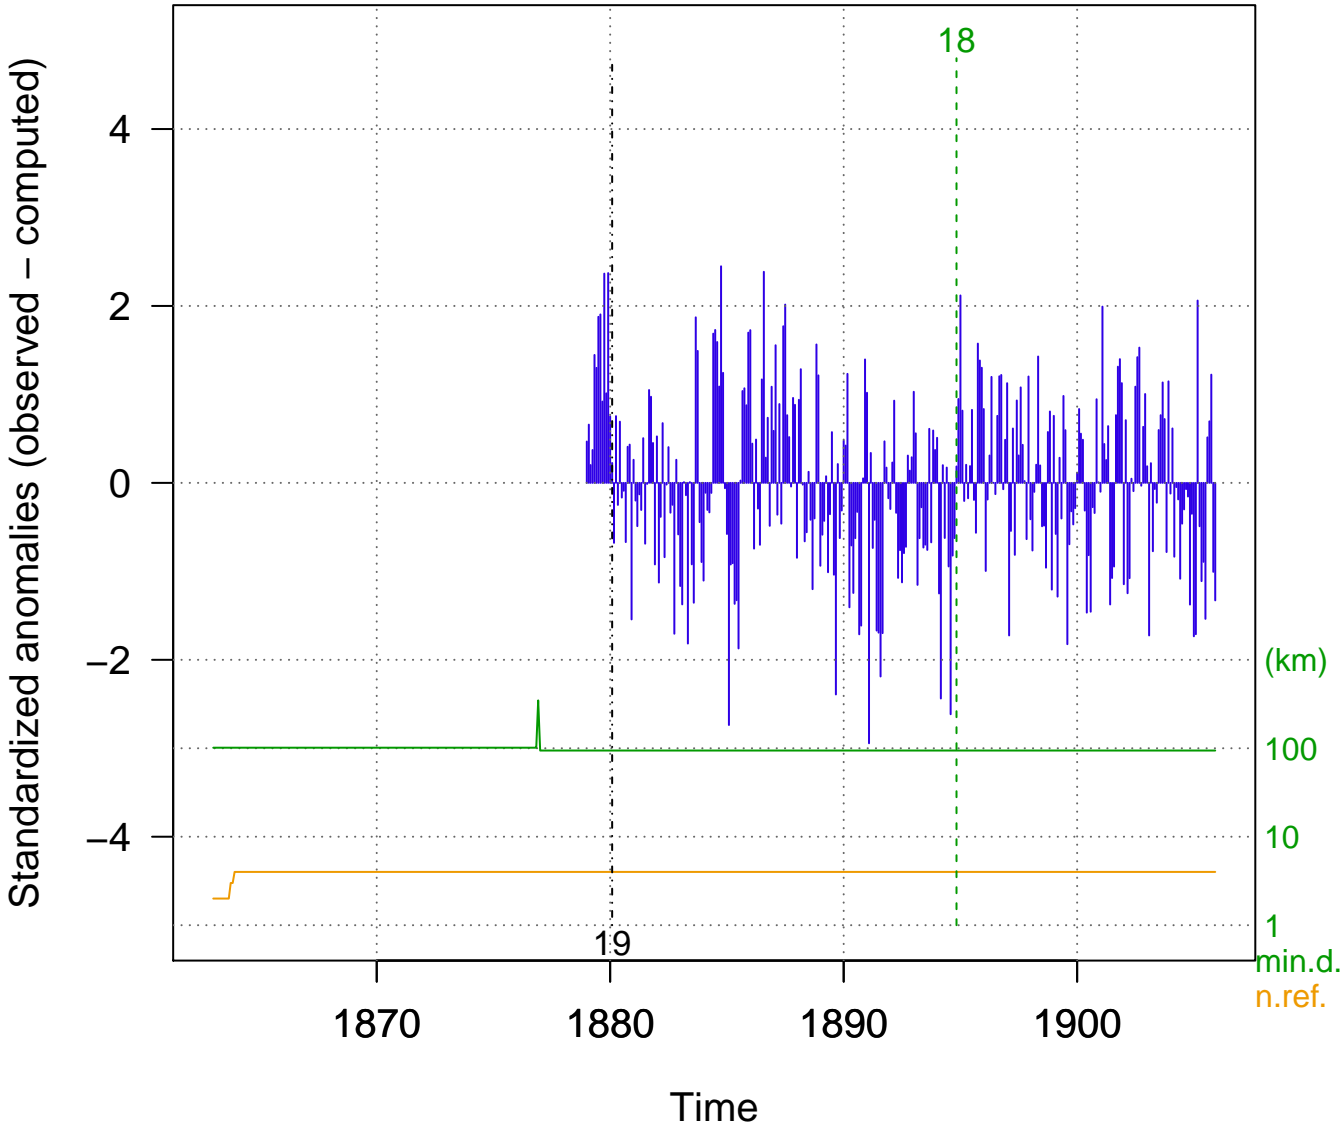

# RH 2 (Moncorvo)

## Moncorvo

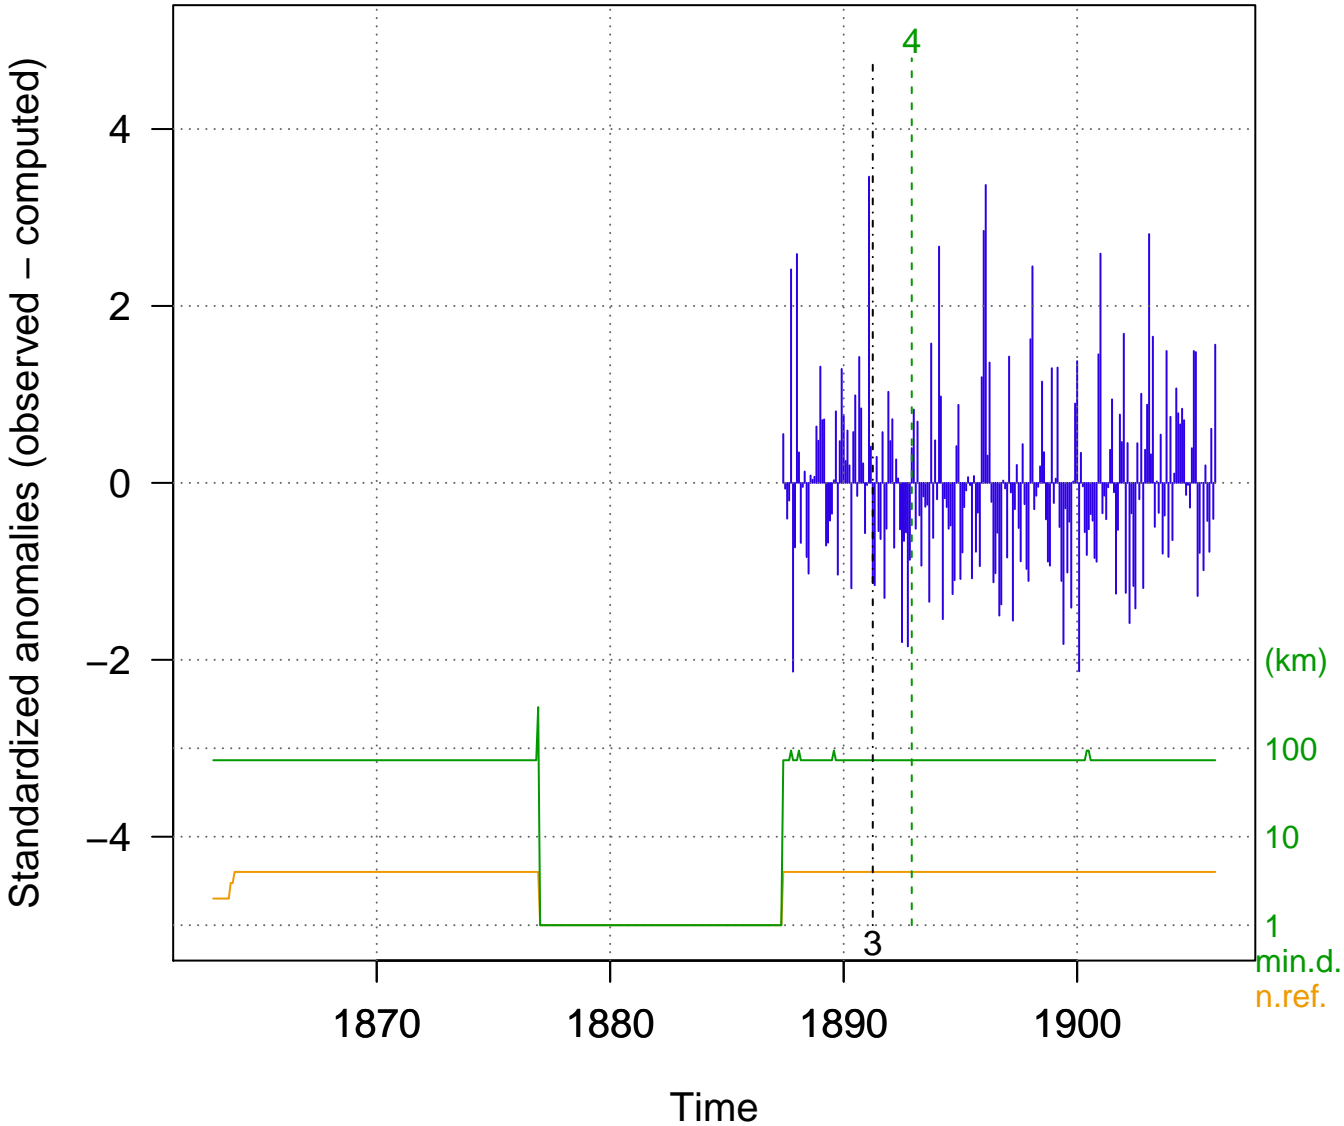

# RH 26 (Moncorvo-2) Moncorvo-2

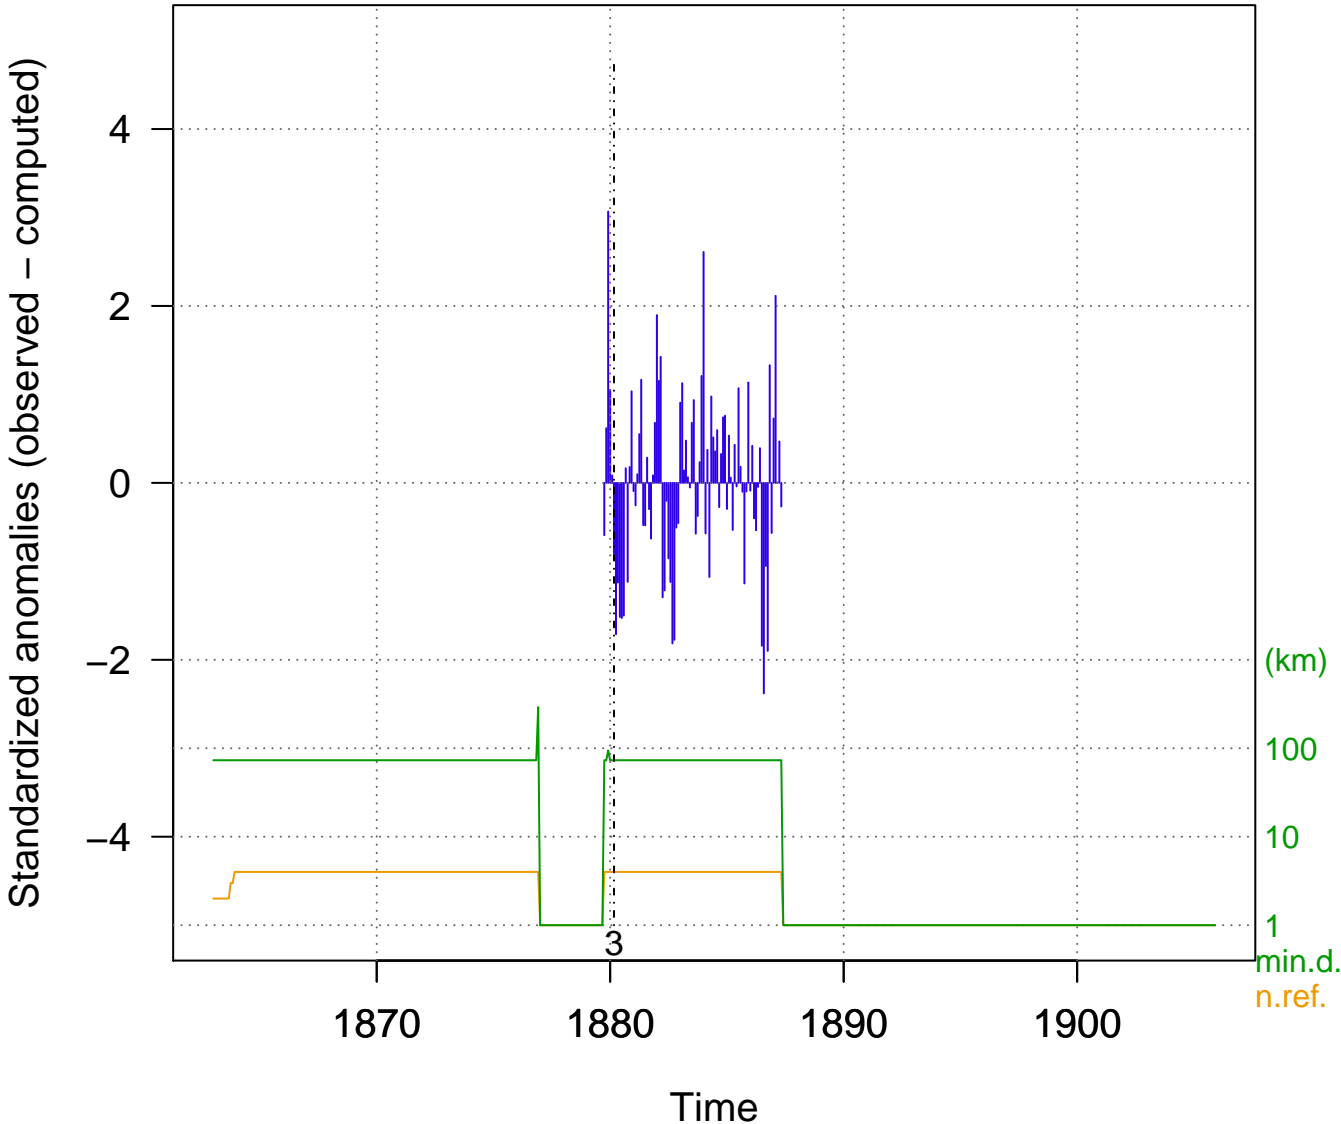



# RH 32 (Moncorvo-3) Moncorvo-3

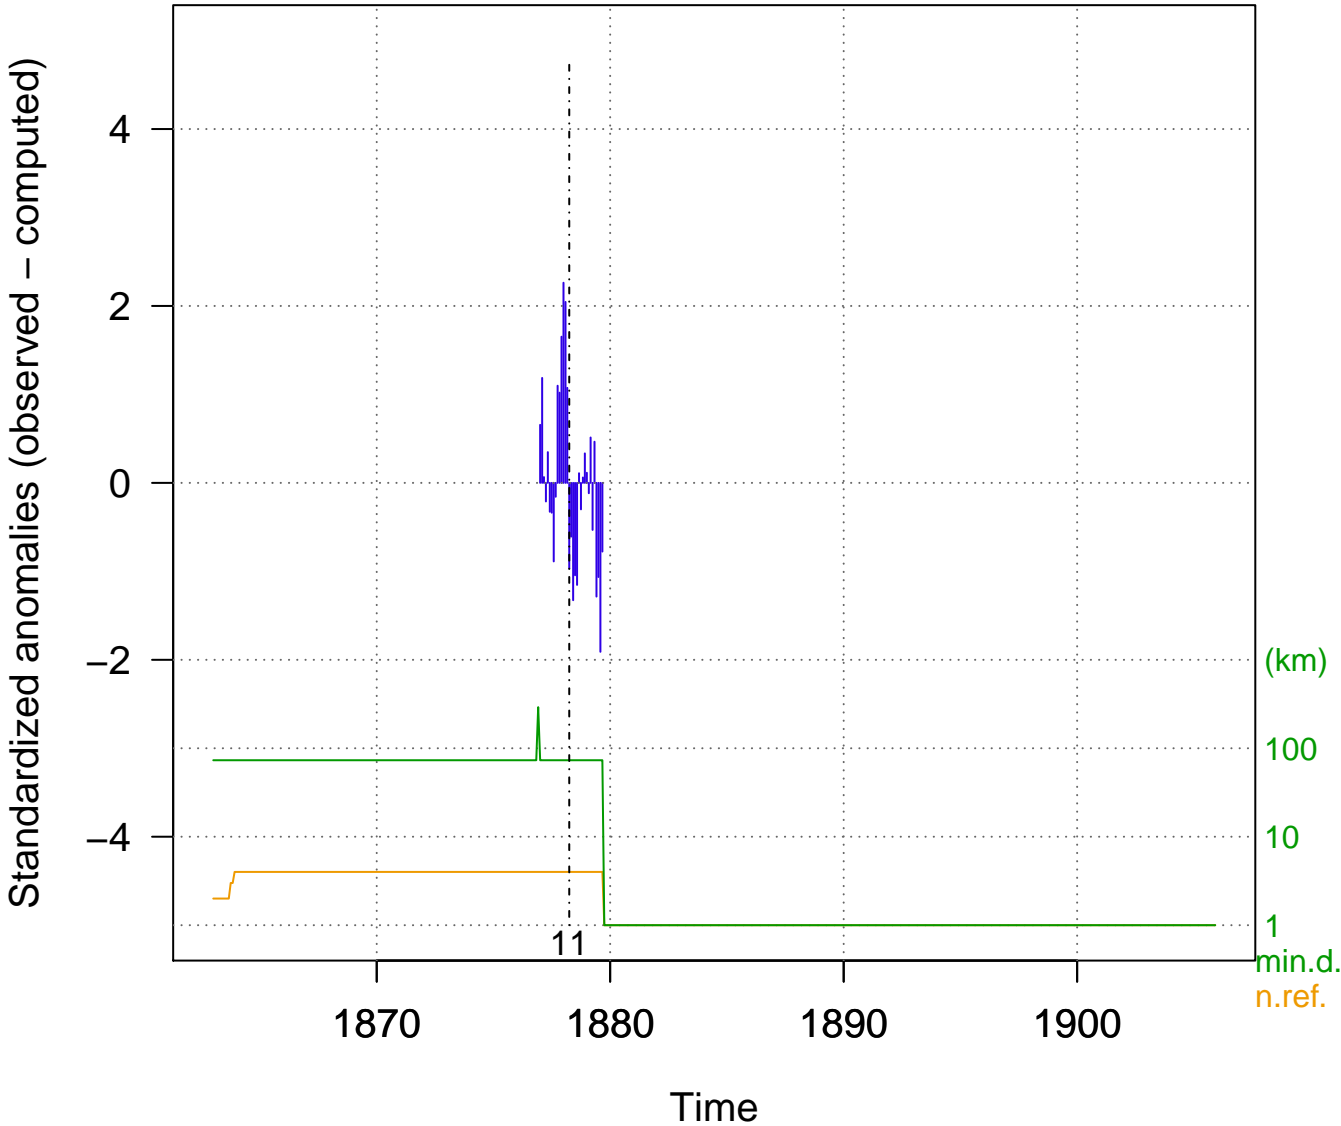

# RH 3 (Porto) Porto

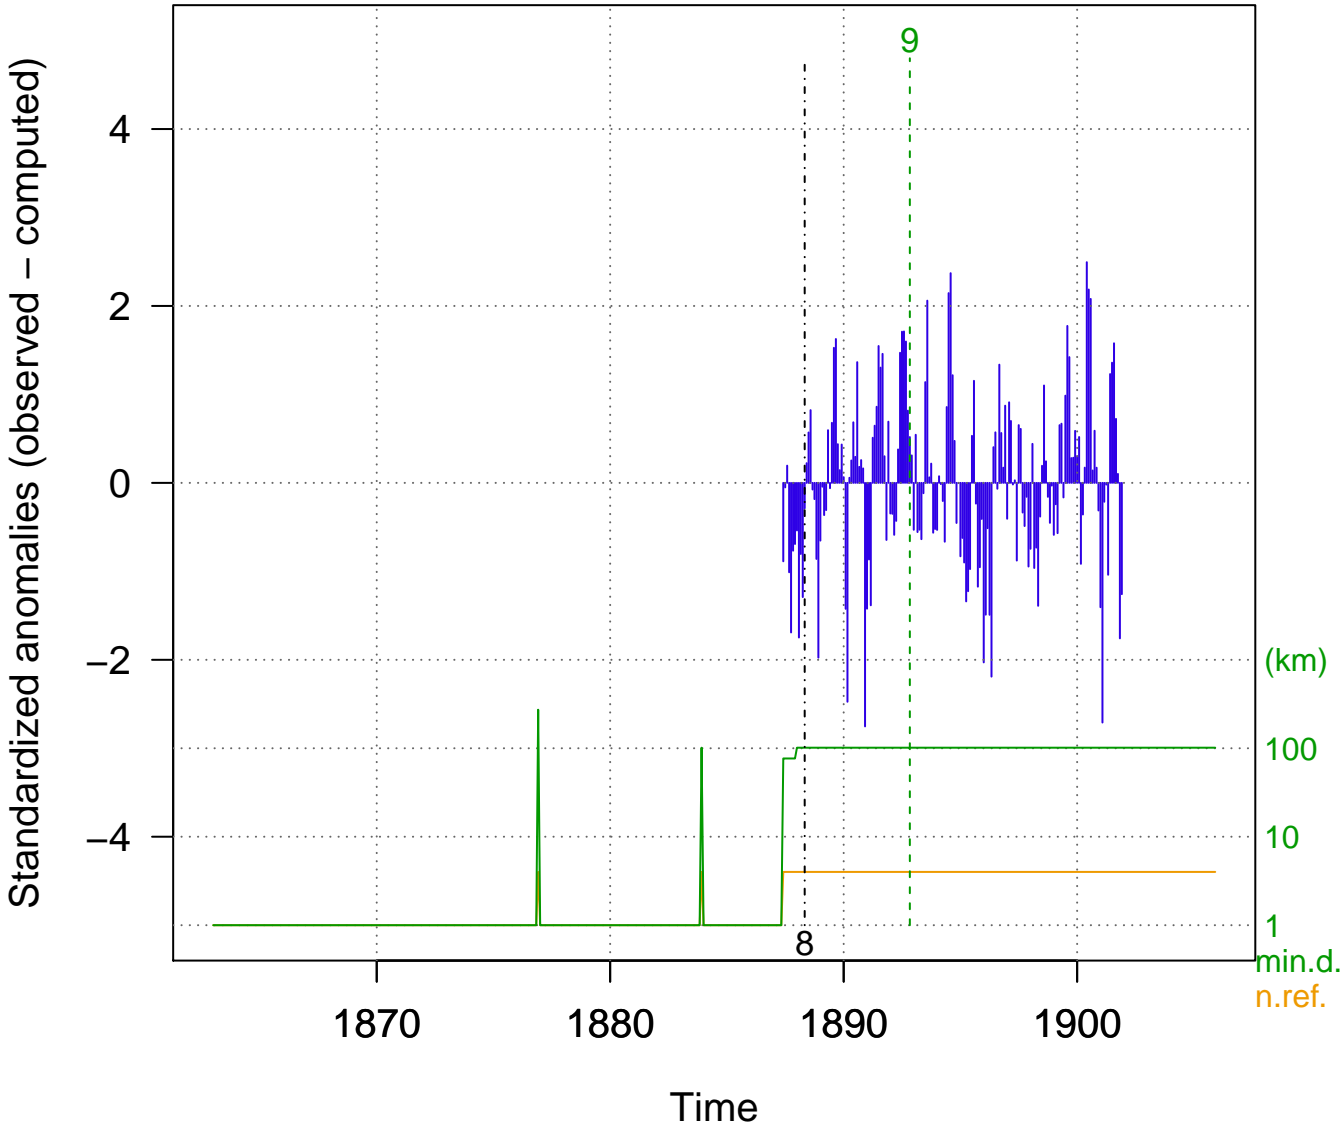

# RH 25 (Porto-2) Porto-2

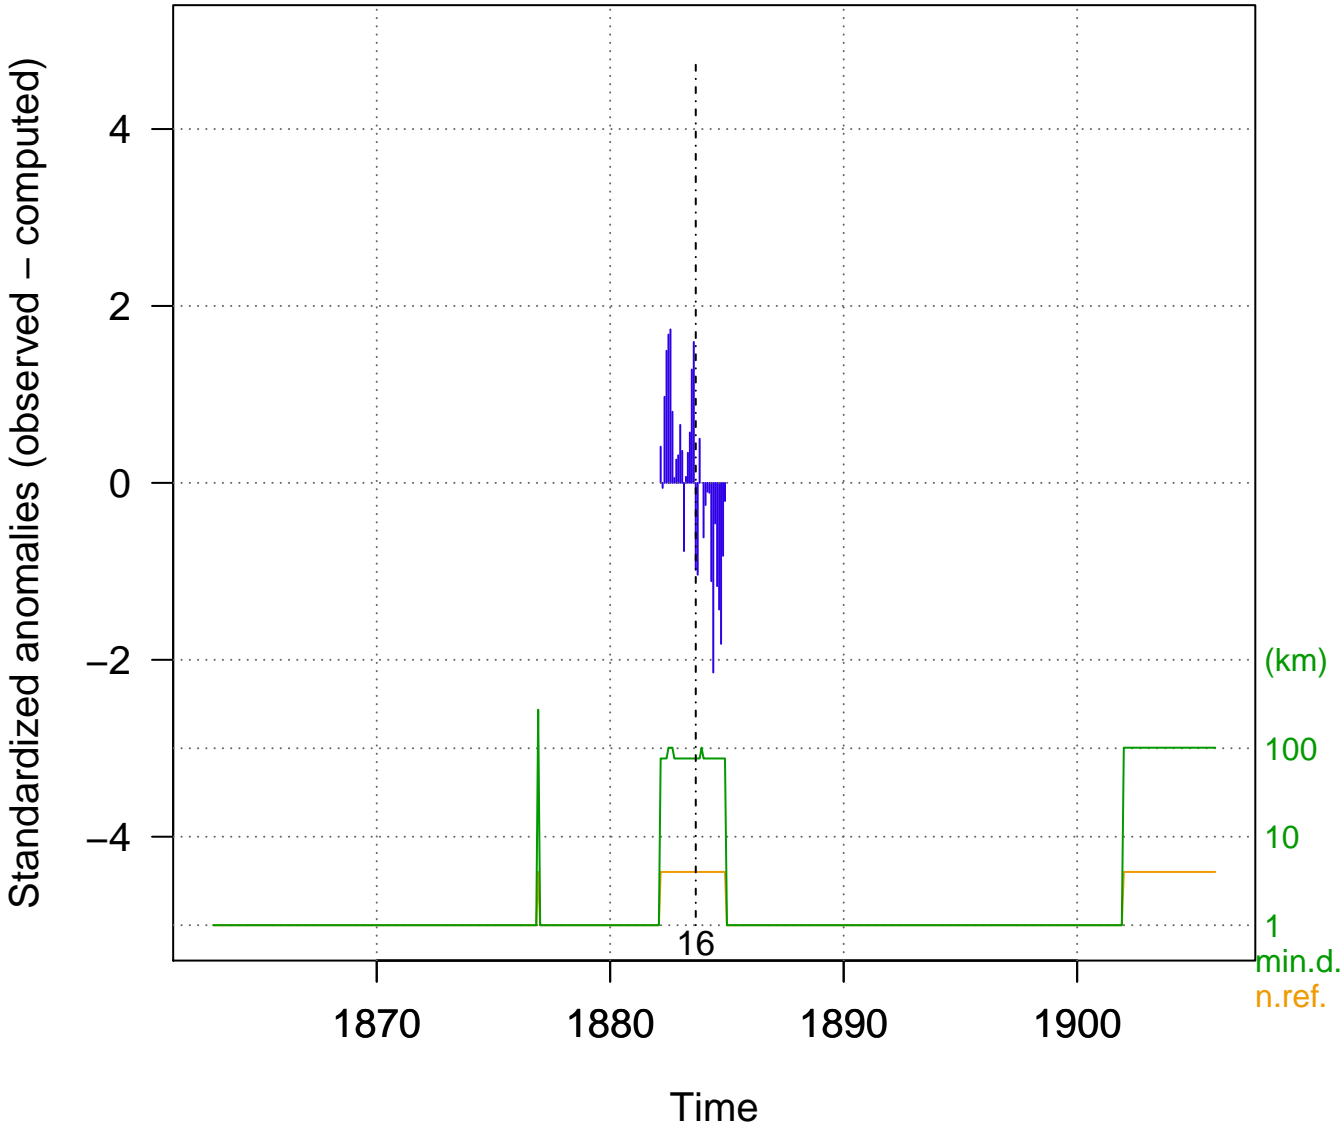

# RH 28 (Porto-3) Porto-3

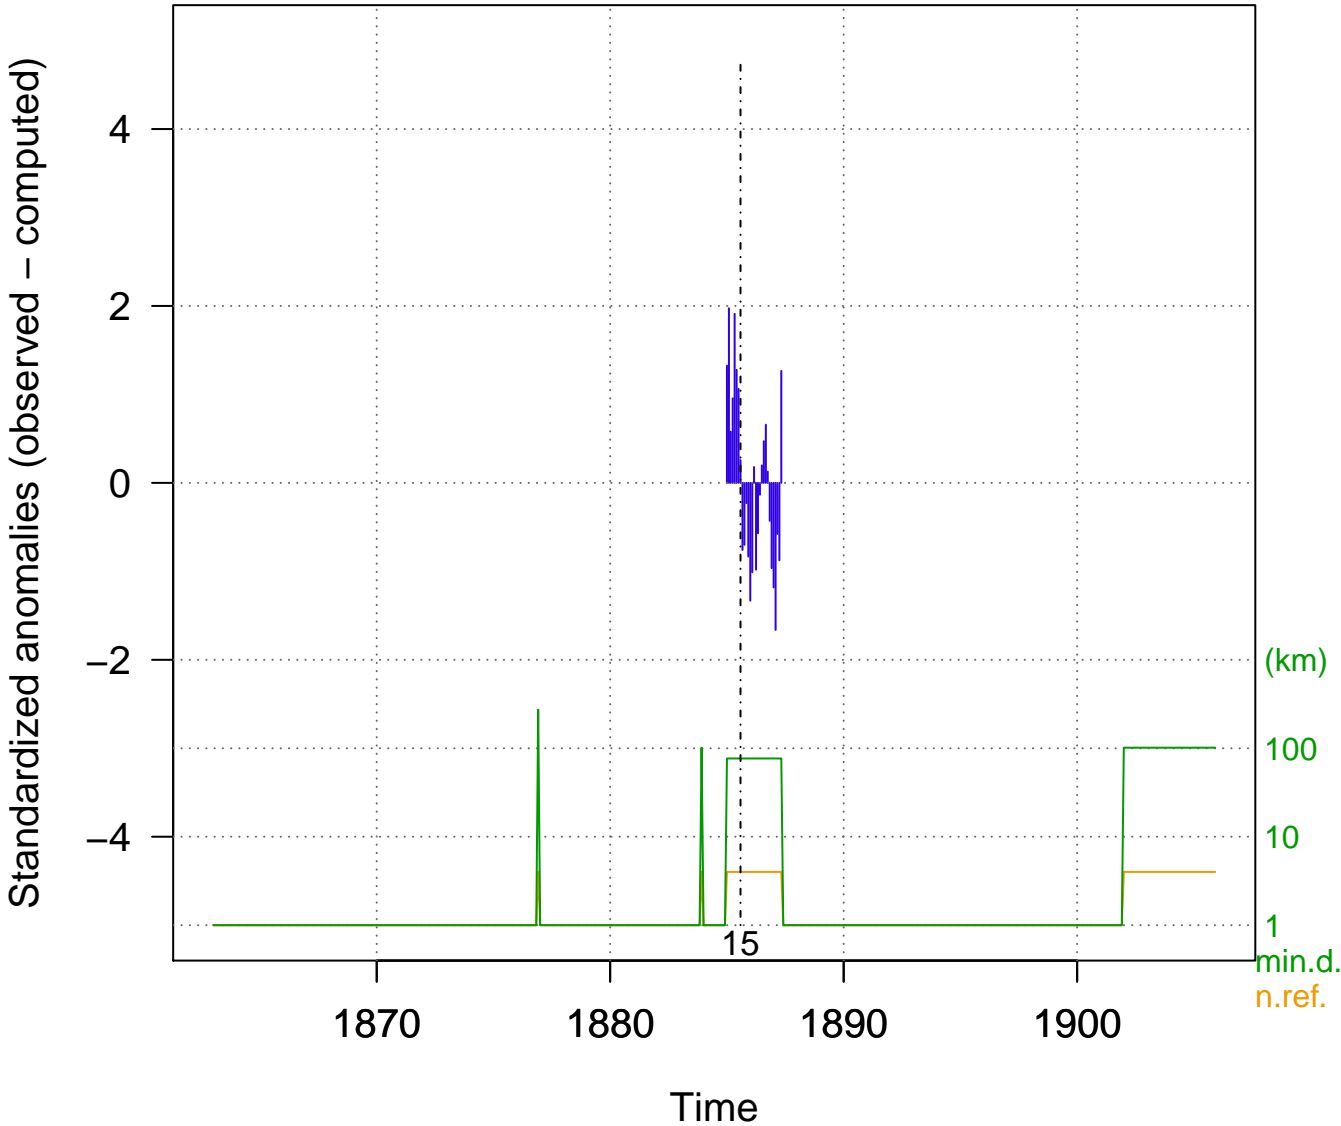

# RH 34 (Porto-4) Porto-4

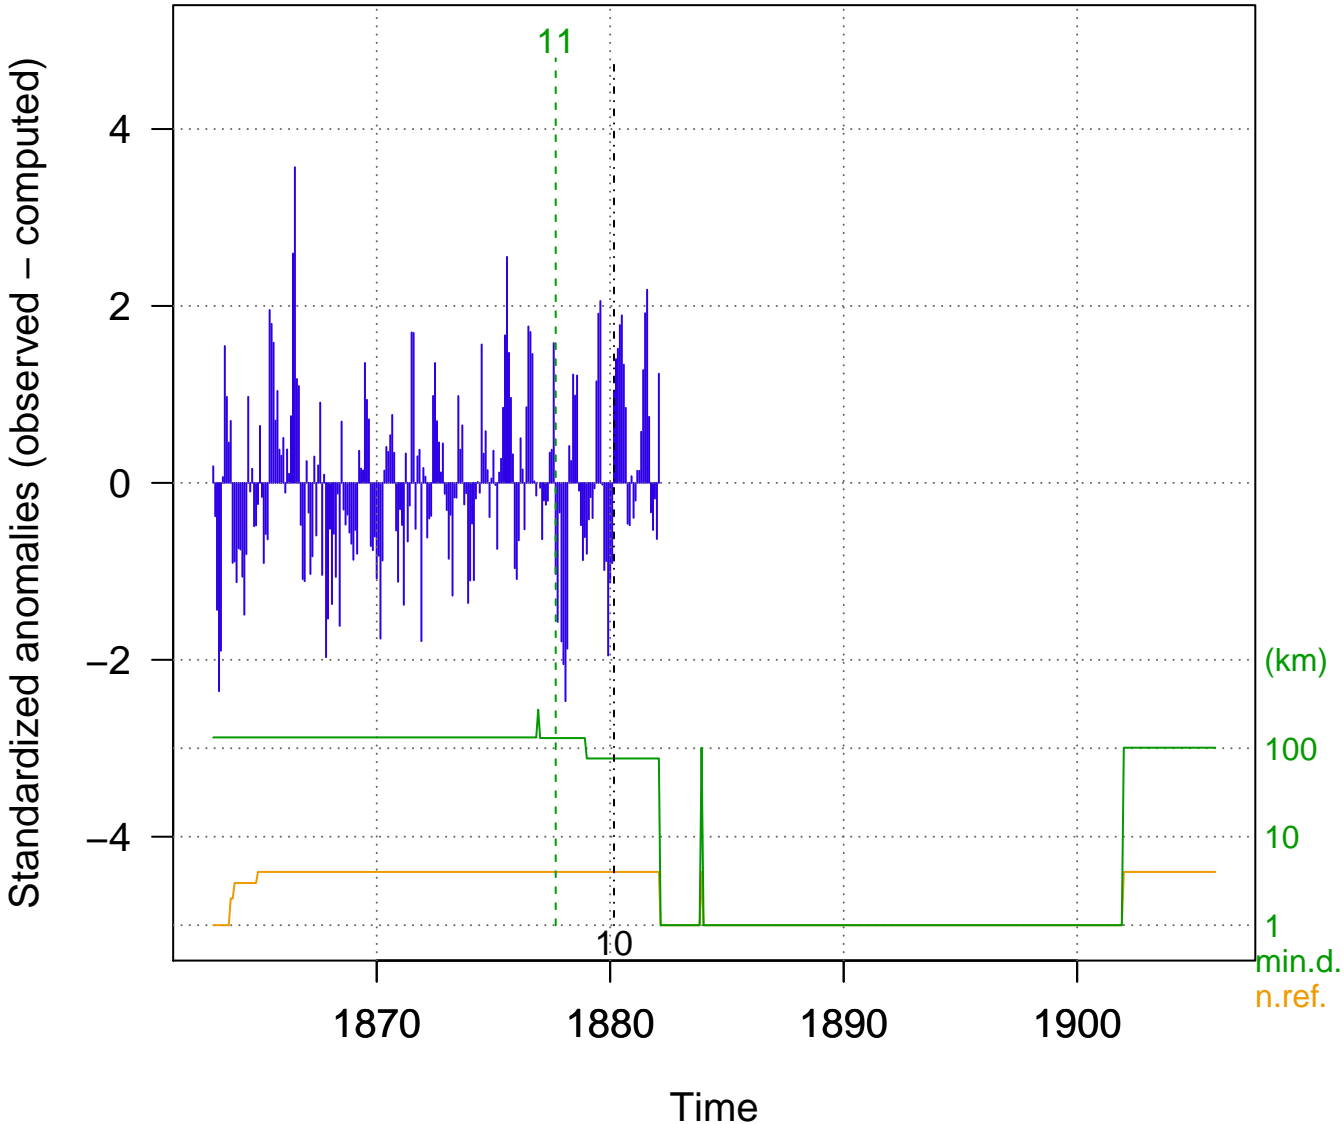

RH 4 (Vizeu)

Vizeu

Standardized anomalies (observed - computed)

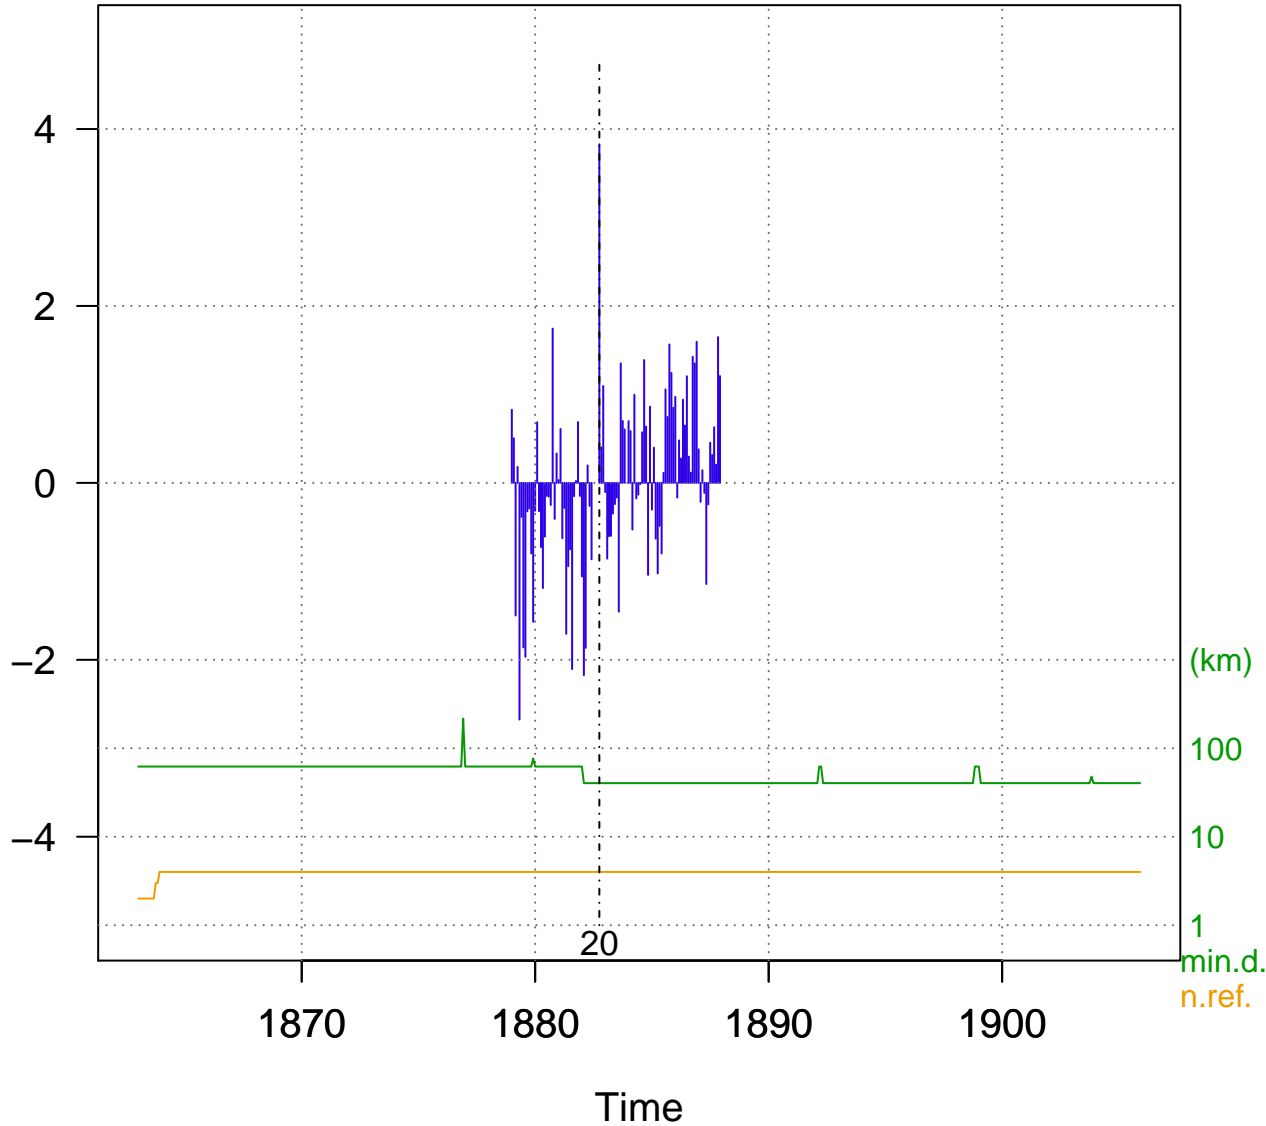

# RH 5 (Guarda) Guarda

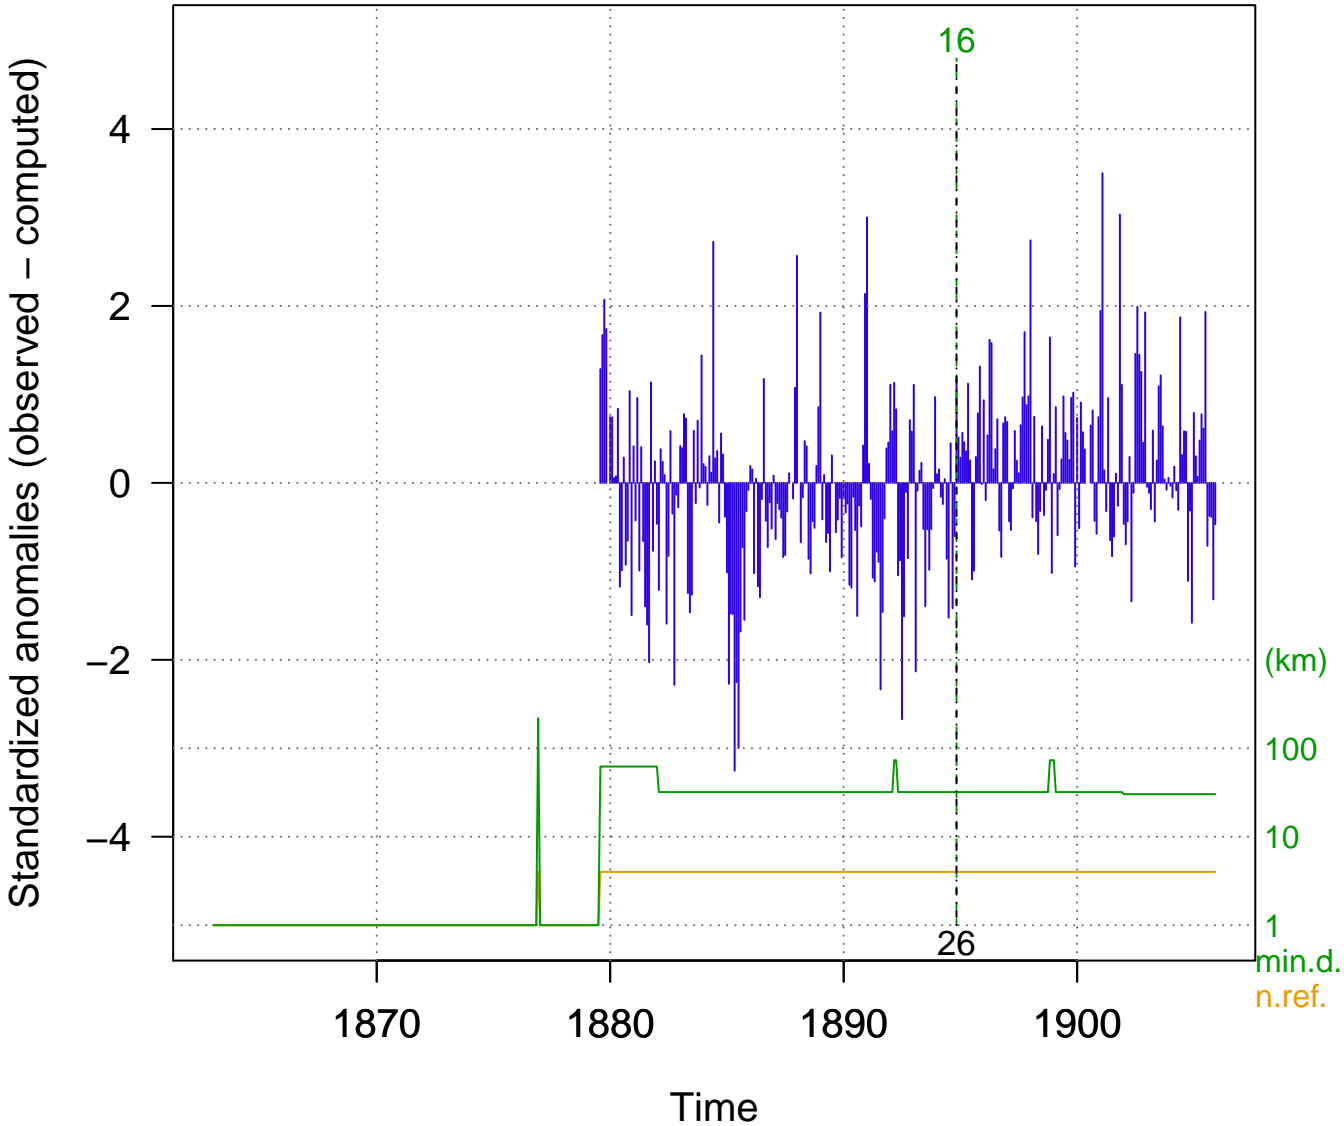

# RH 23 (Guarda-2) Guarda-2

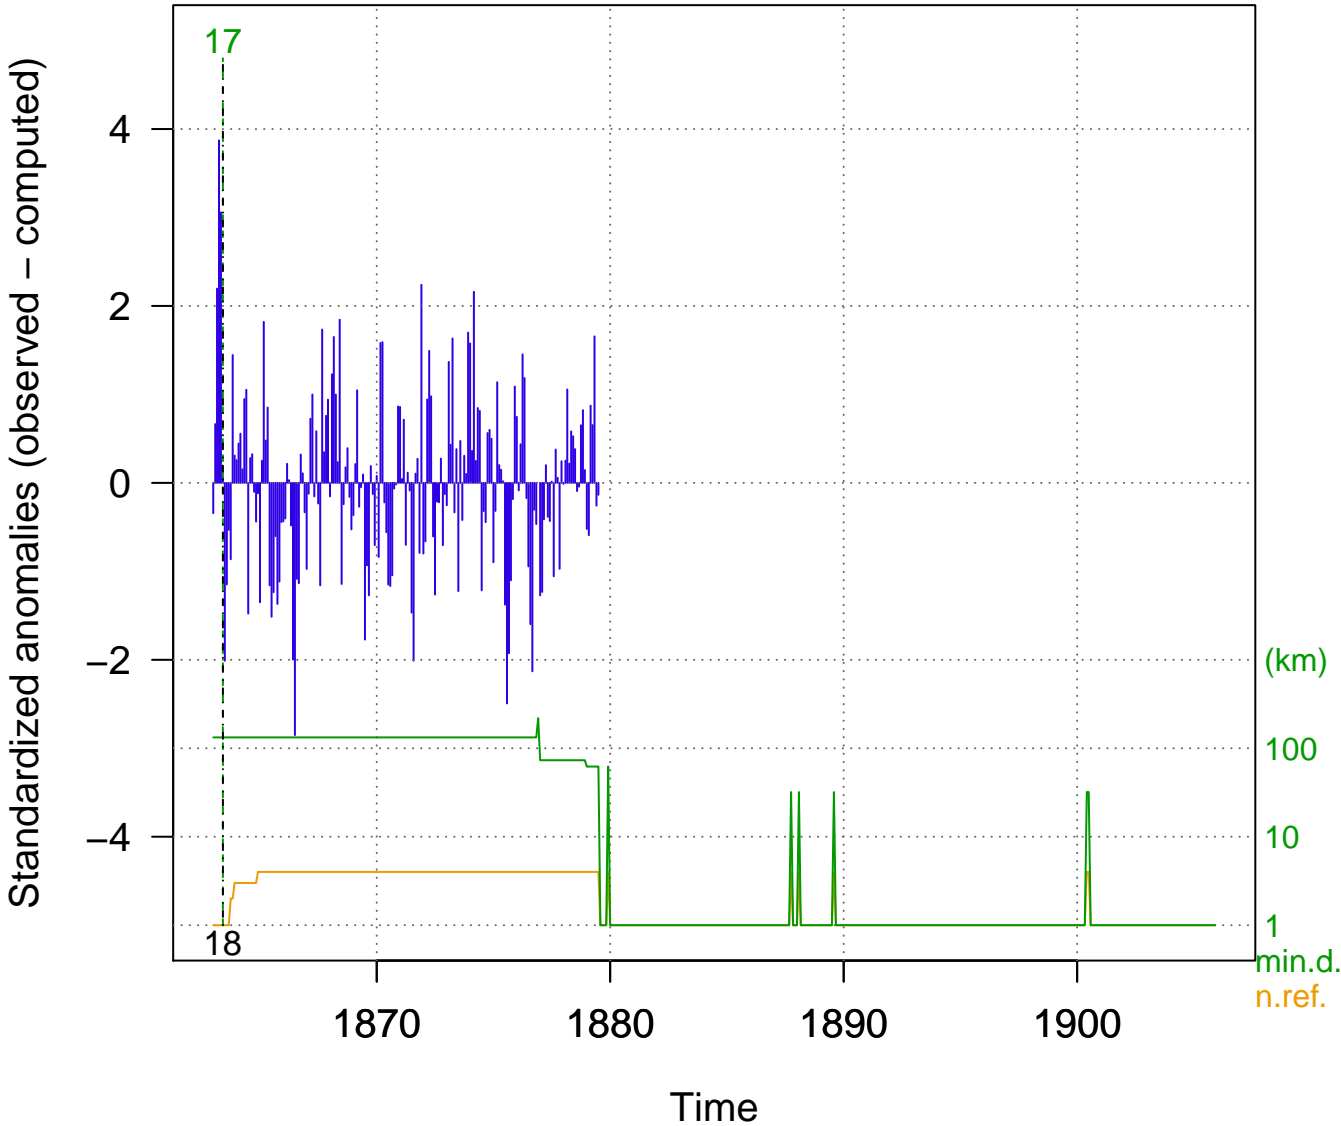



# RH 6 (Serra\_da\_Estrella)

## Serra da Estrella

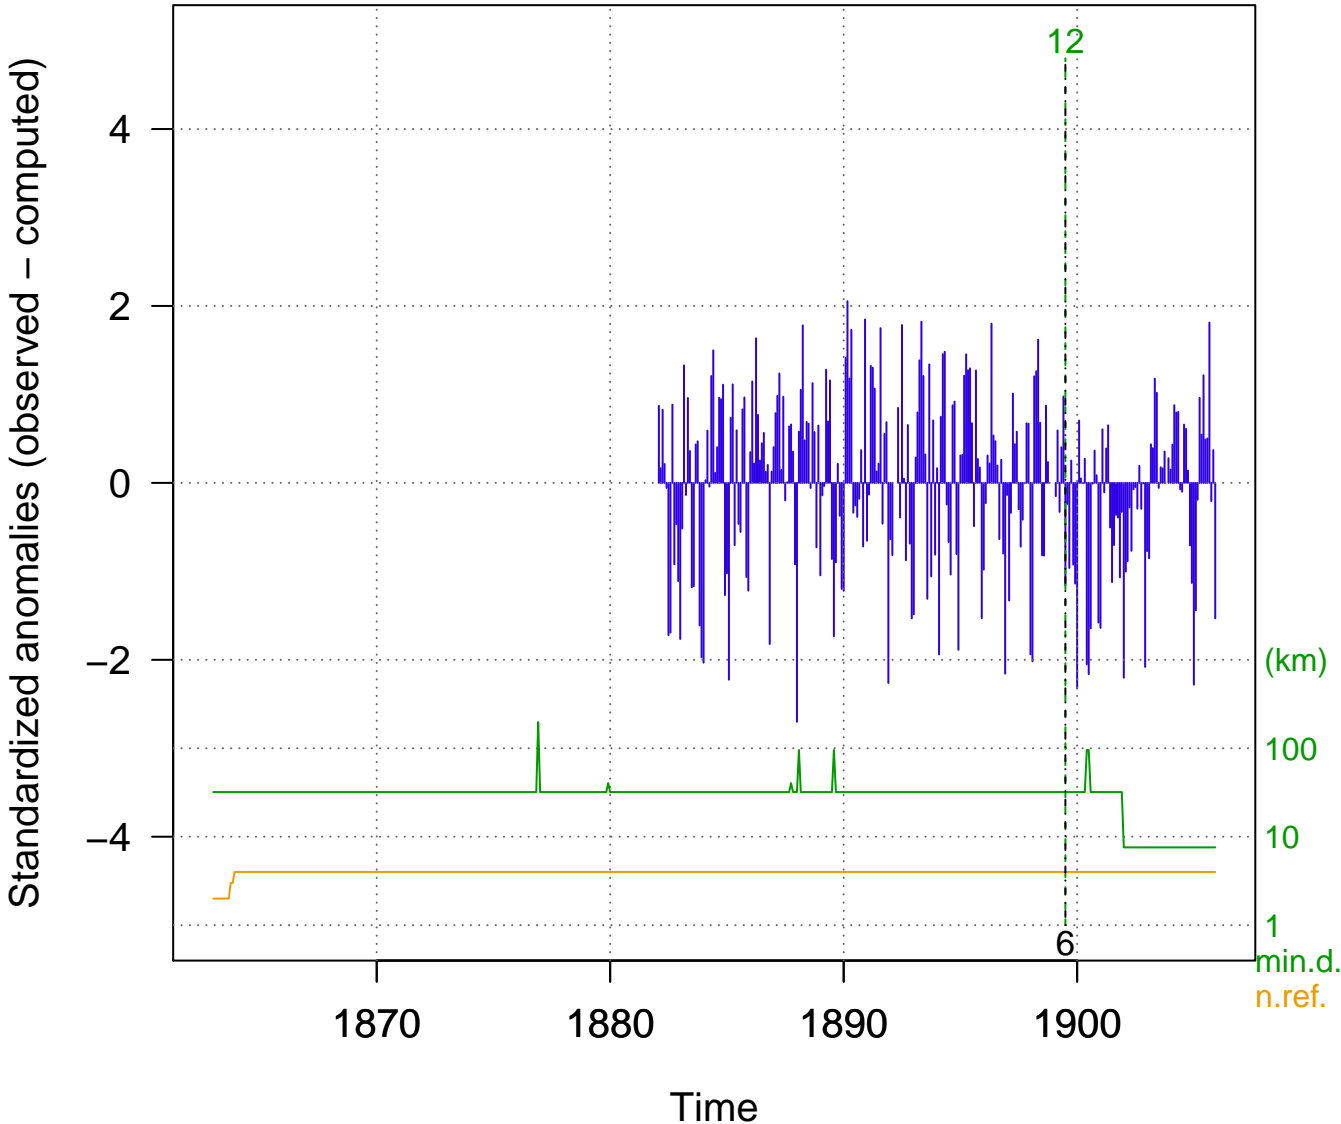

RH 7 (S.\_Fiel)

S. Fiel

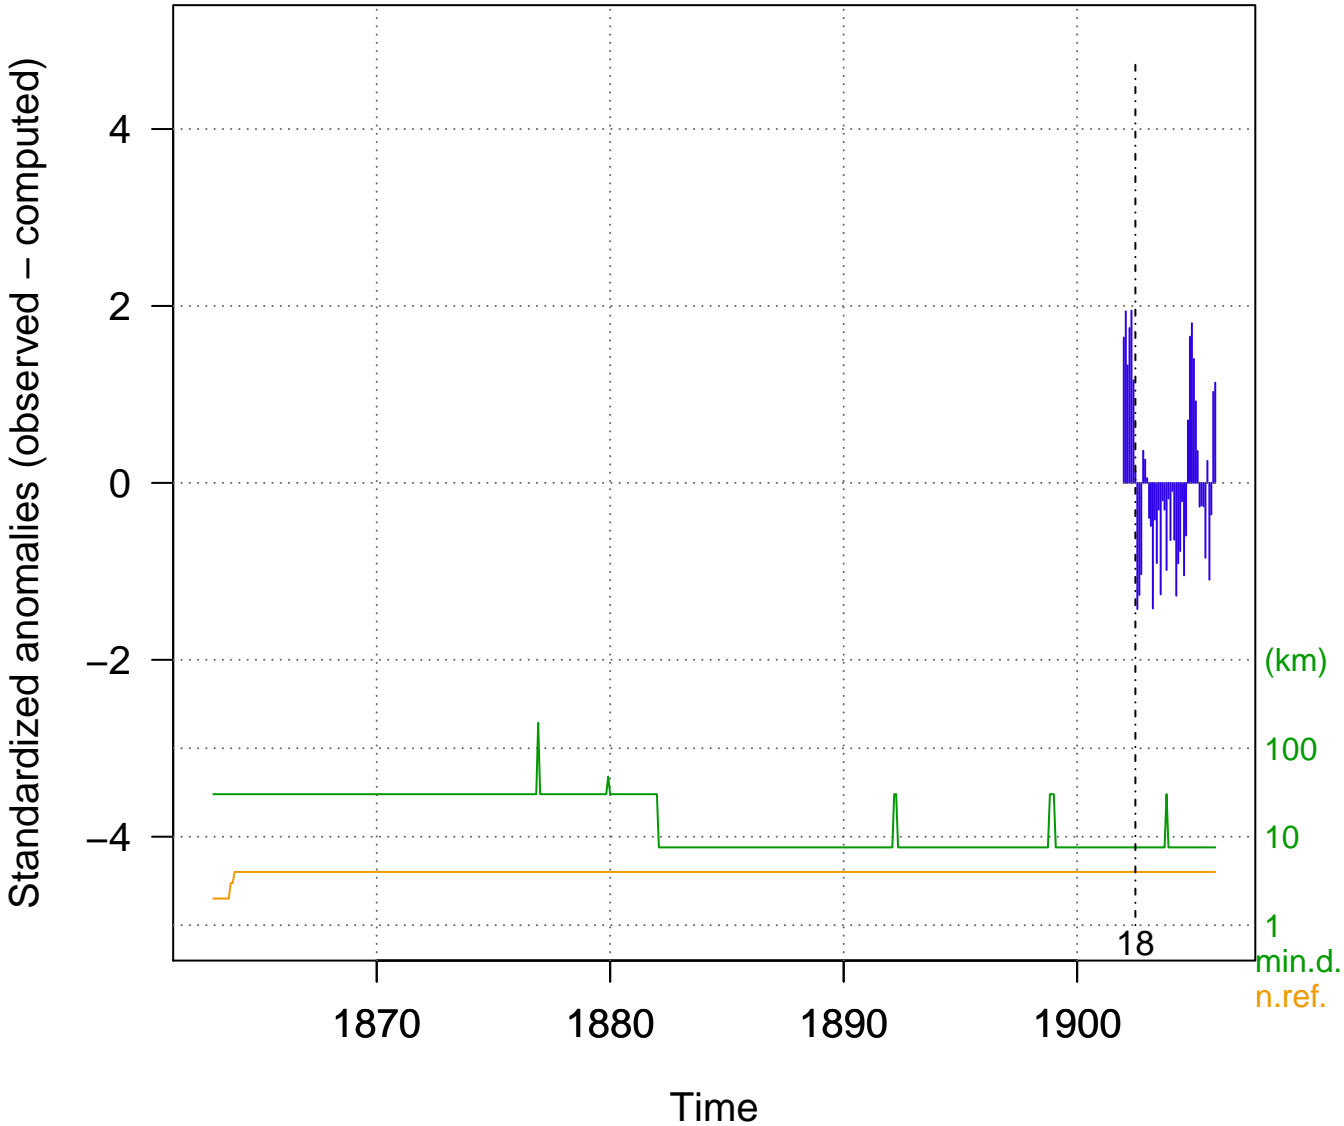

# RH 8 (Alcanhoes) Alcanhoes

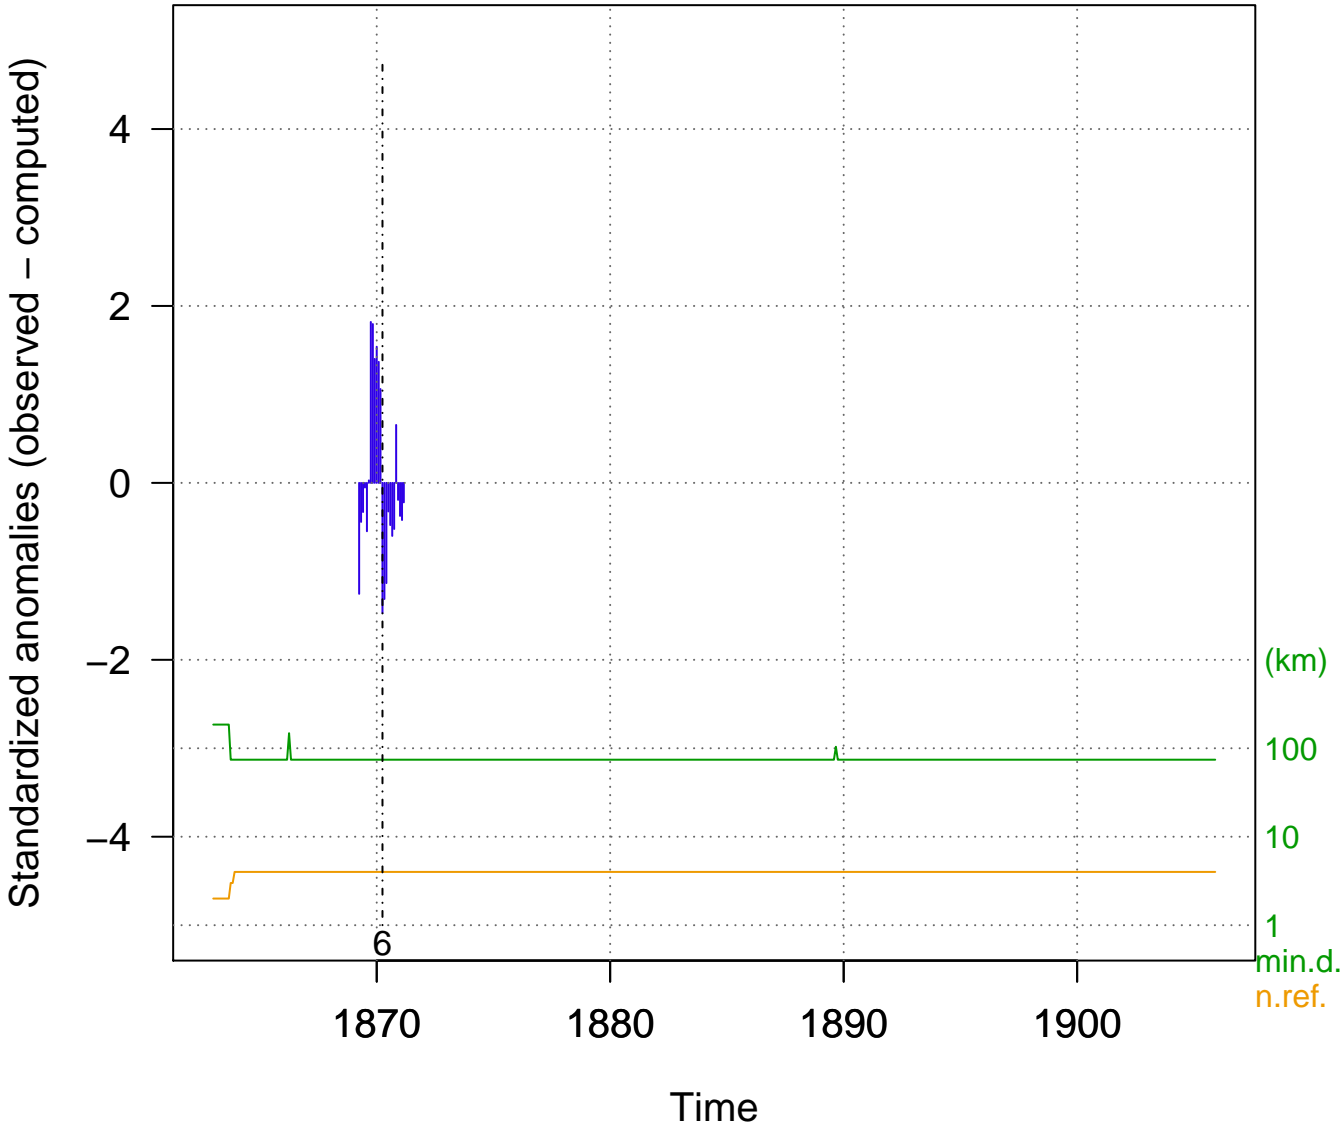

# RH 9 (Campo\_Maior) Campo Maior

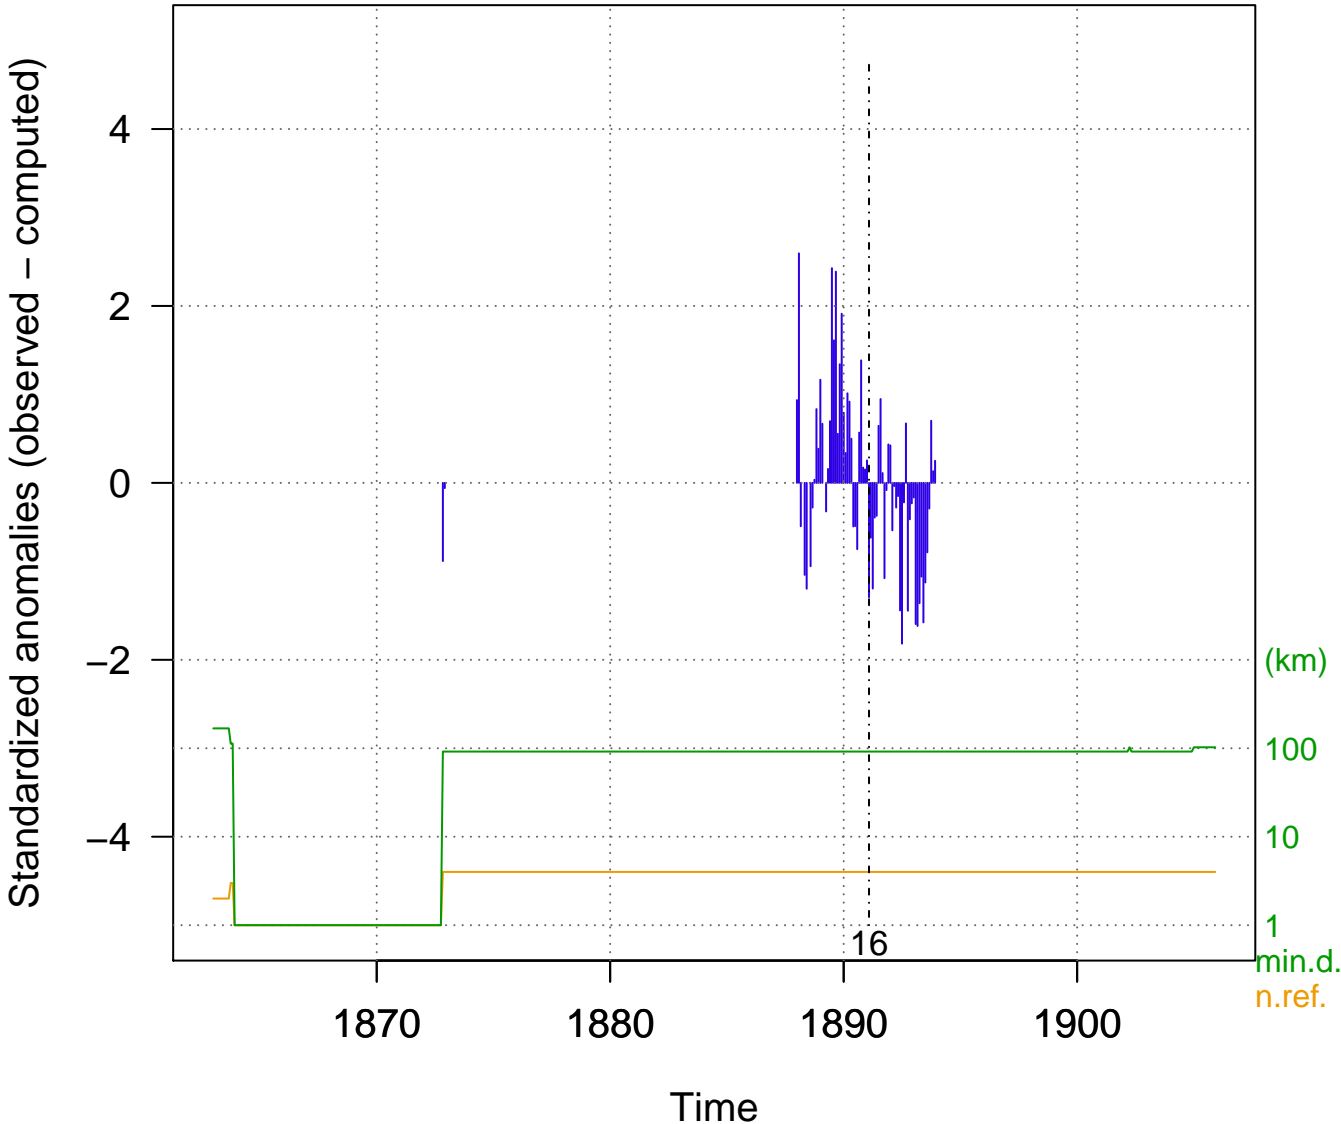

# RH 35 (Campo\_Maior-2) Campo Maior-2

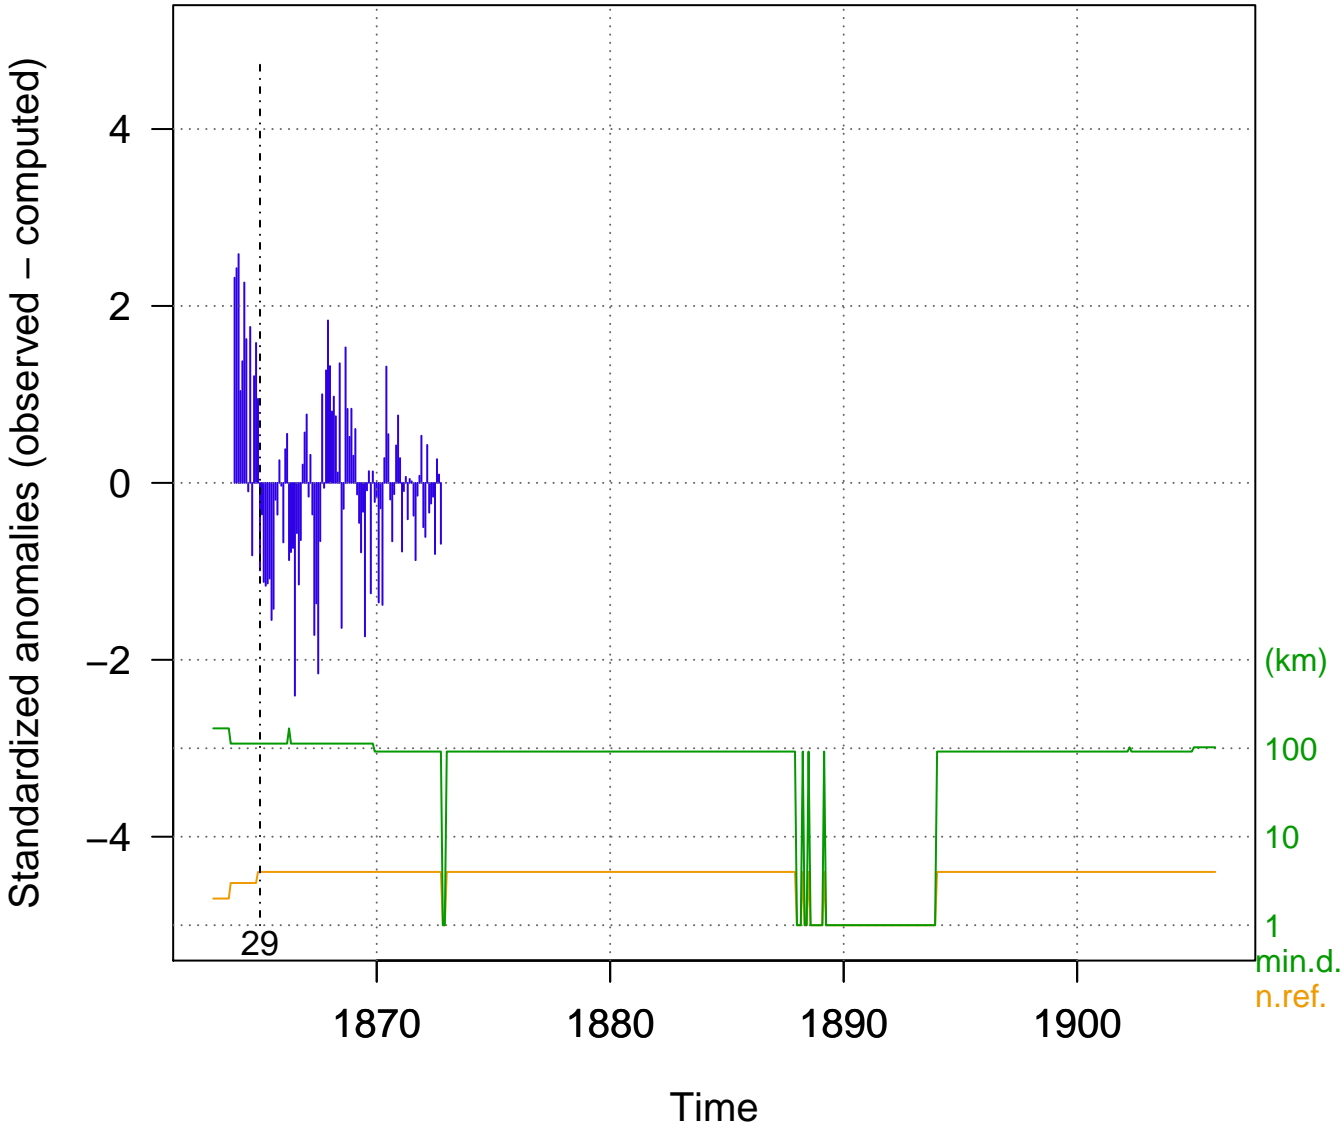

# RH 10 (Infante\_D\_Luiz)

## Lisbon Infante D. Luiz

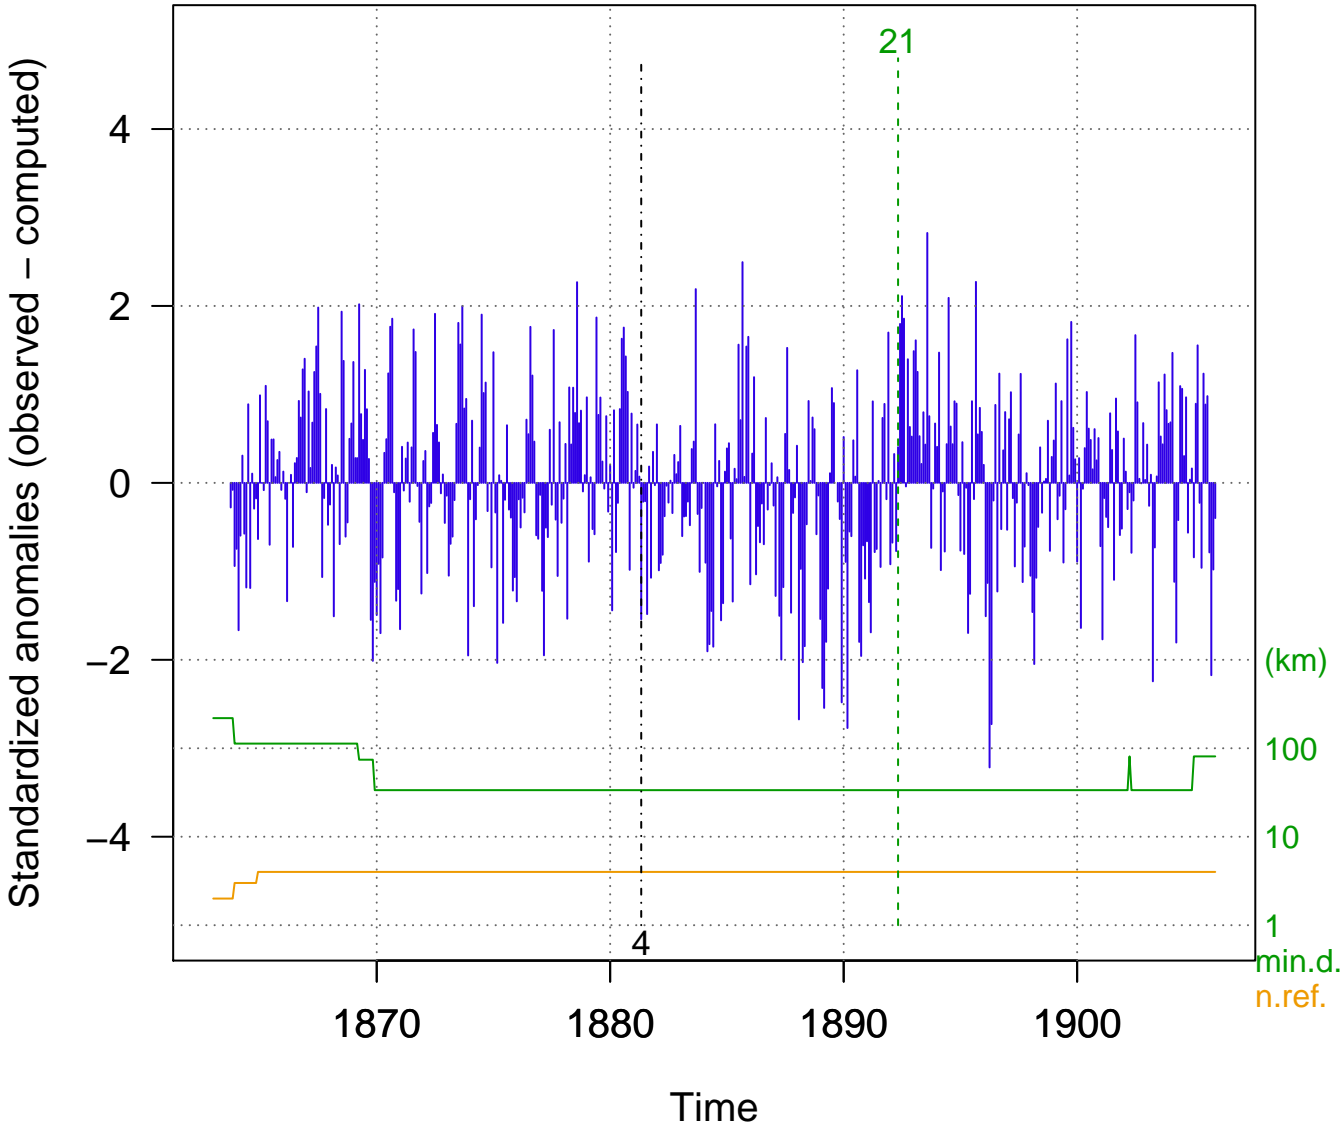

# RH 11 (Angra\_do\_Heroismo)

## Angra do Heroismo

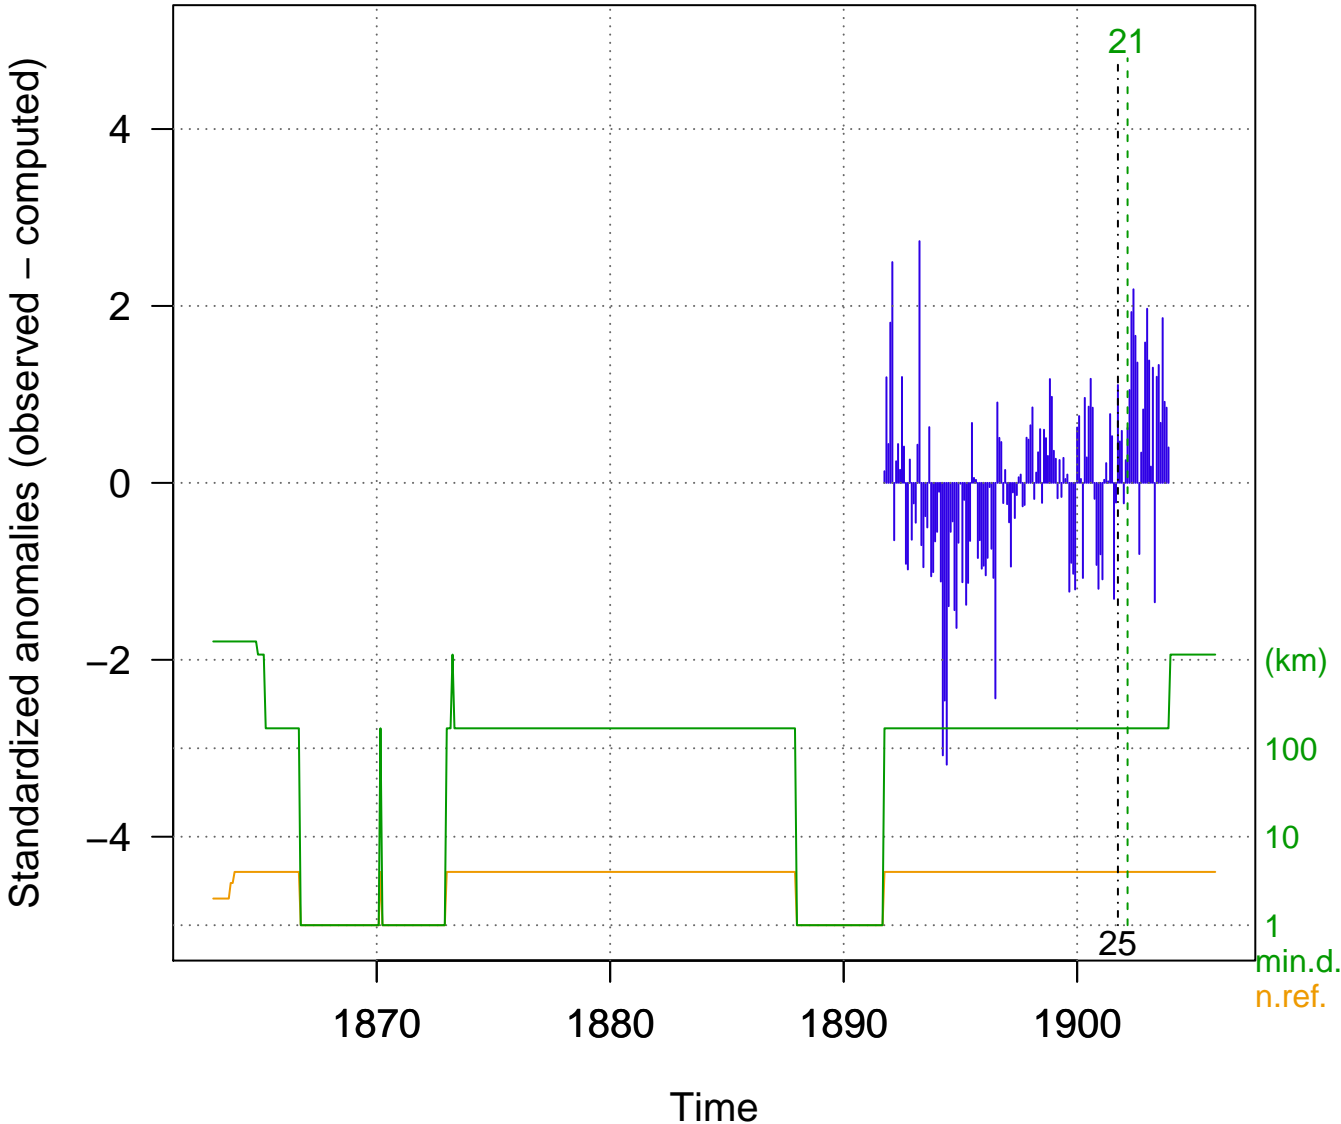

**RH 27 (Angra\_do\_Heroismo-2)**  
**Angra do Heroismo-2**

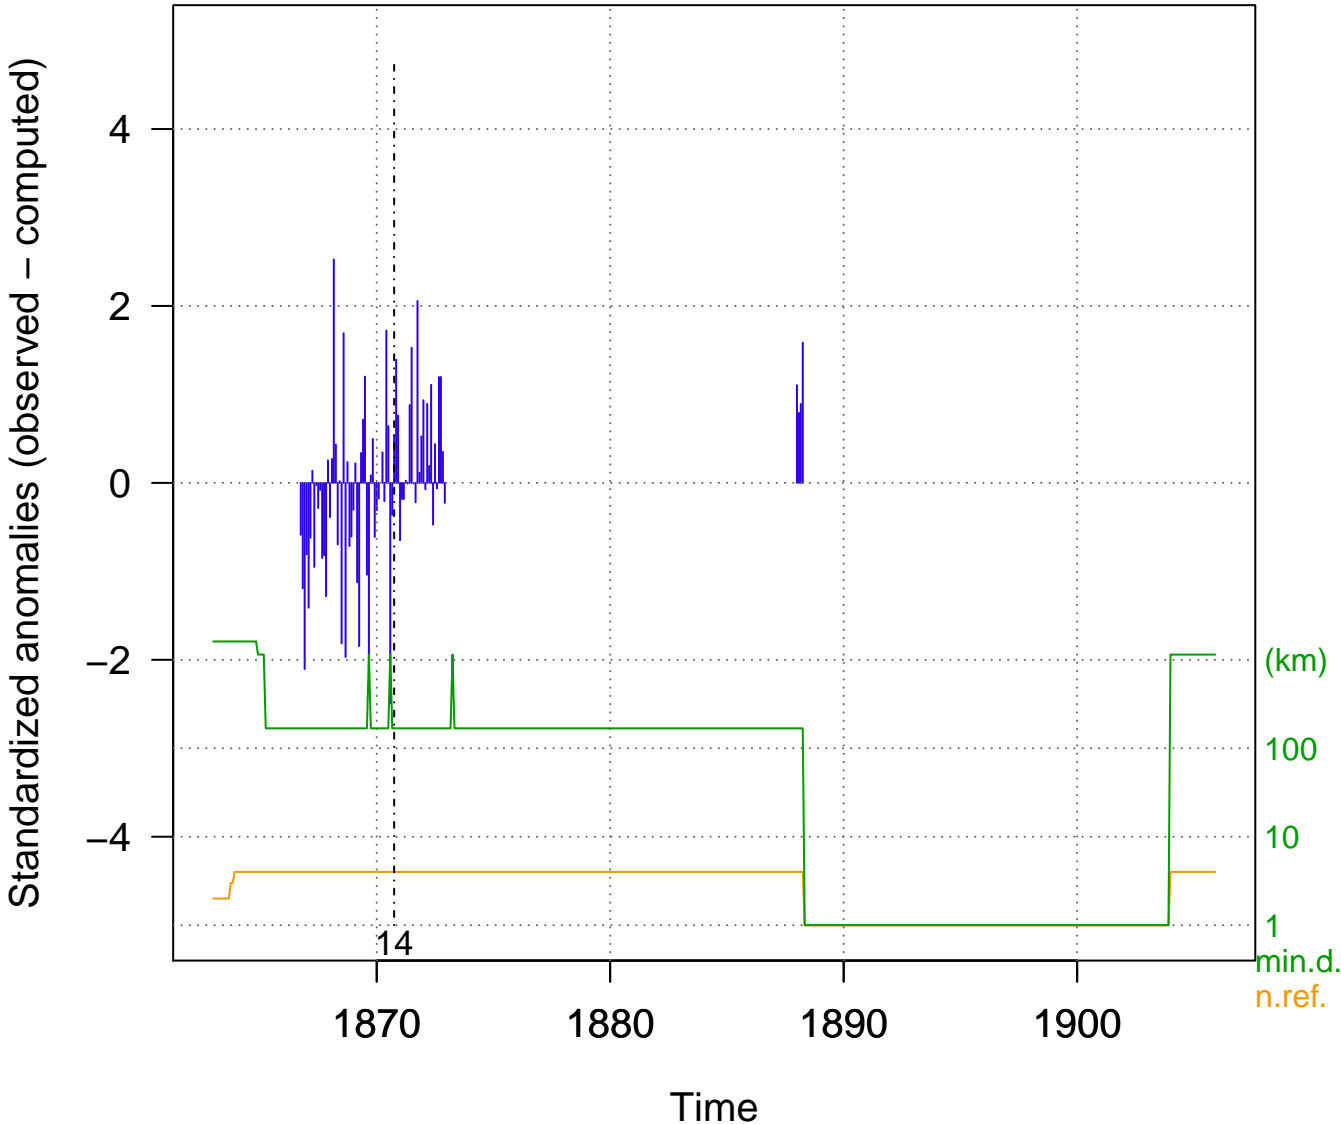



**RH 29 (Angra\_do\_Heroismo-3)**  
**Angra do Heroismo-3**

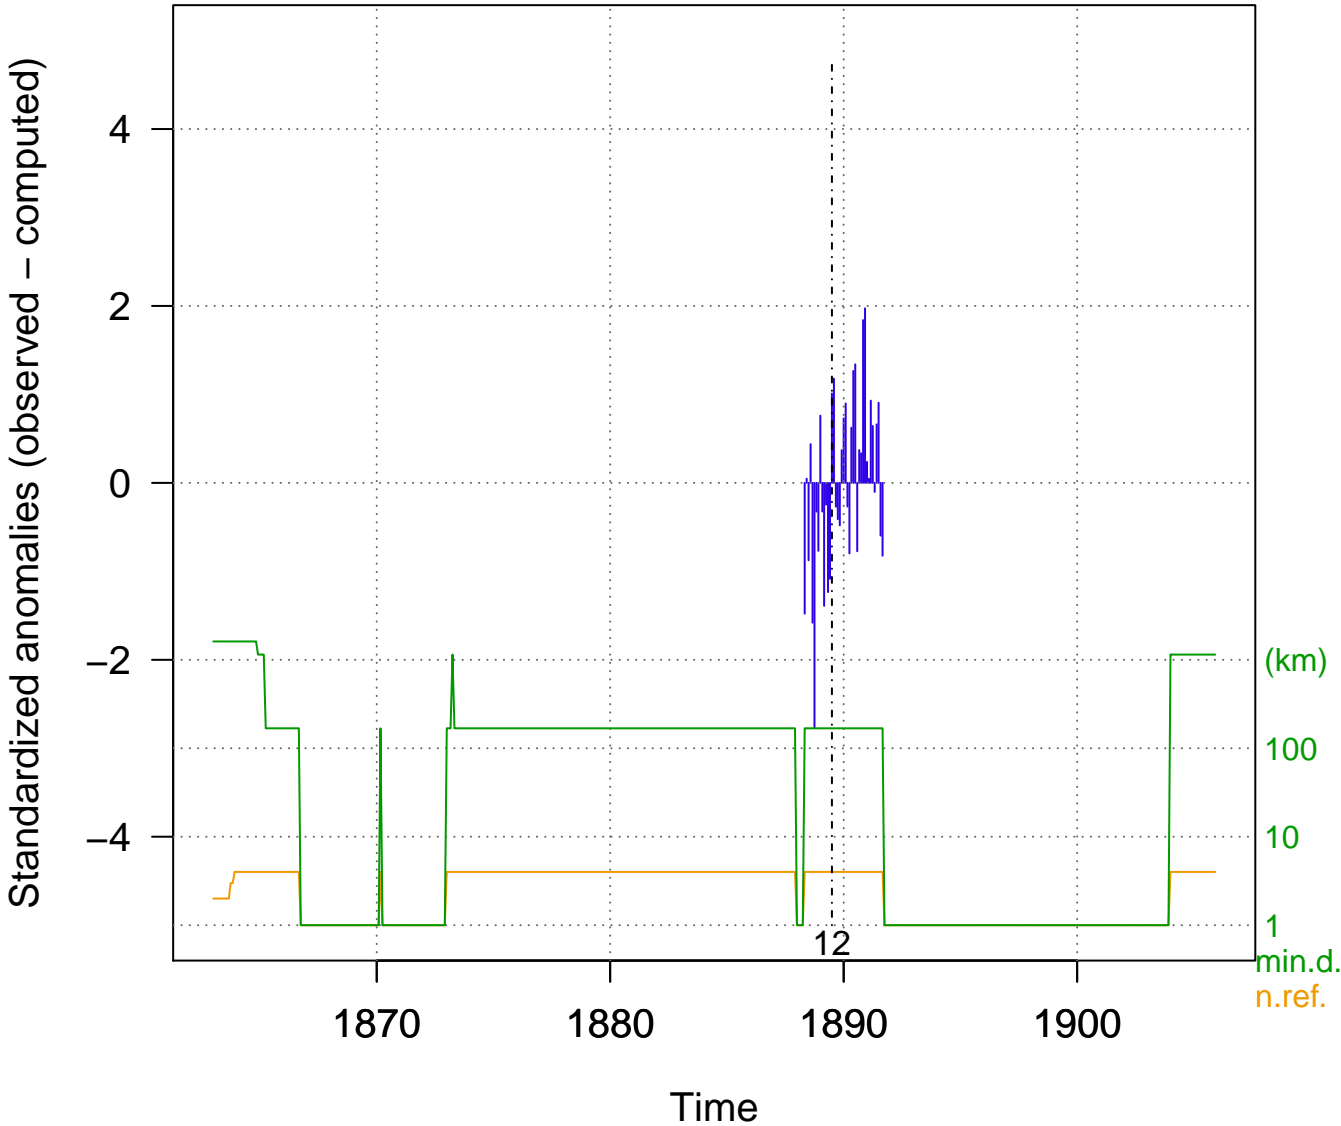

# RH 12 (Evora) Evora

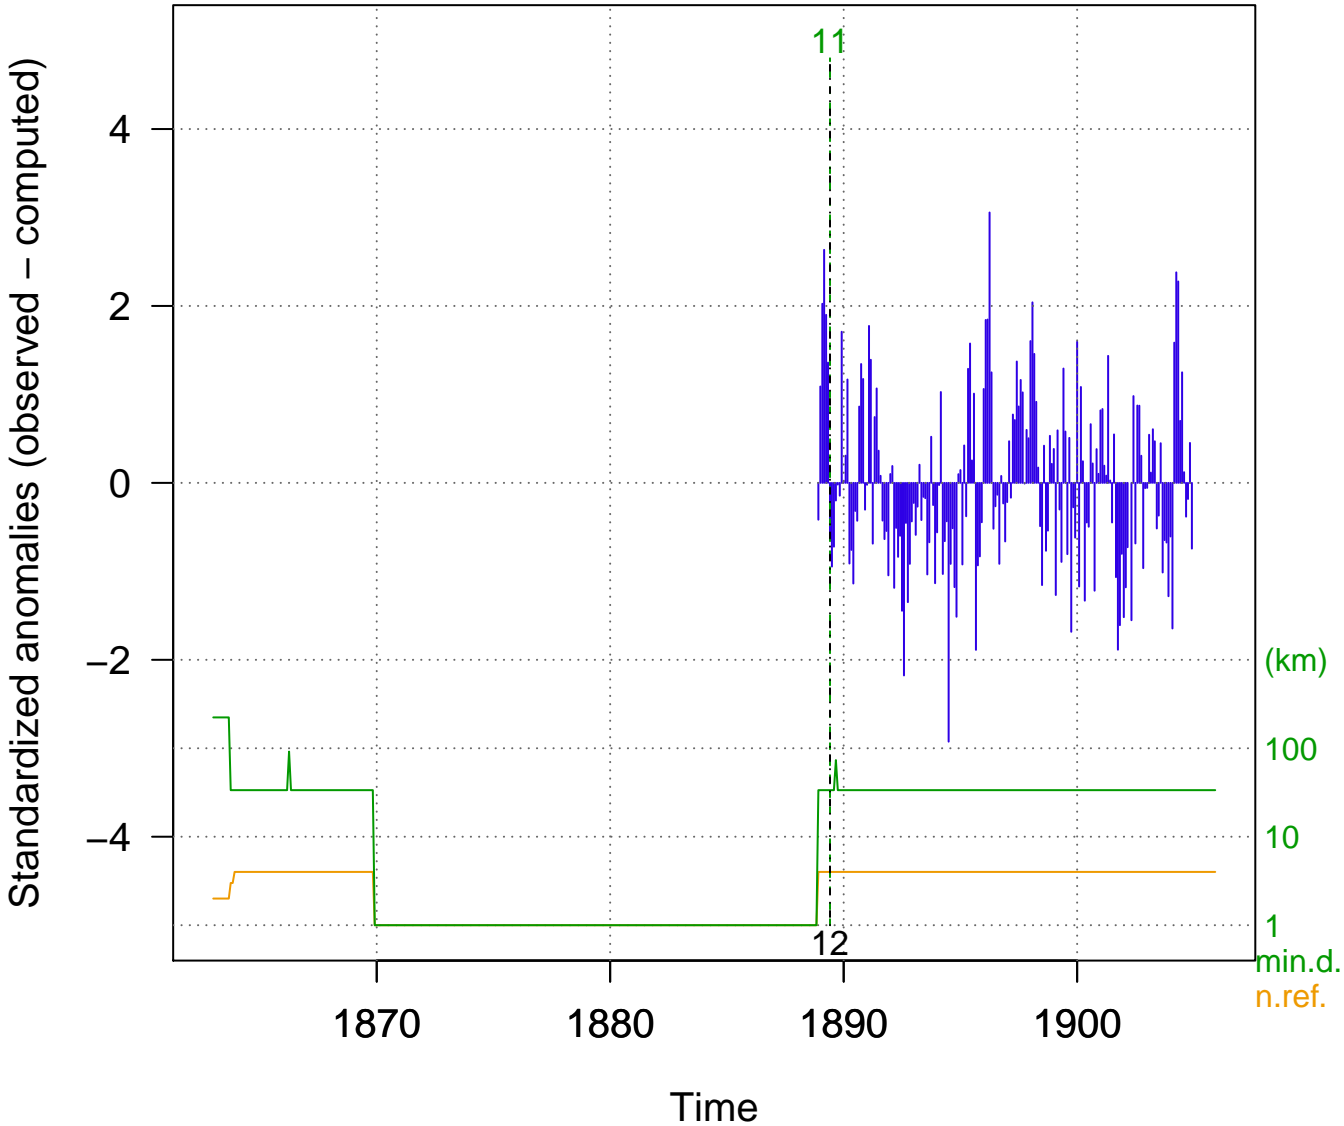

# RH 30 (Evora-2) Evora-2

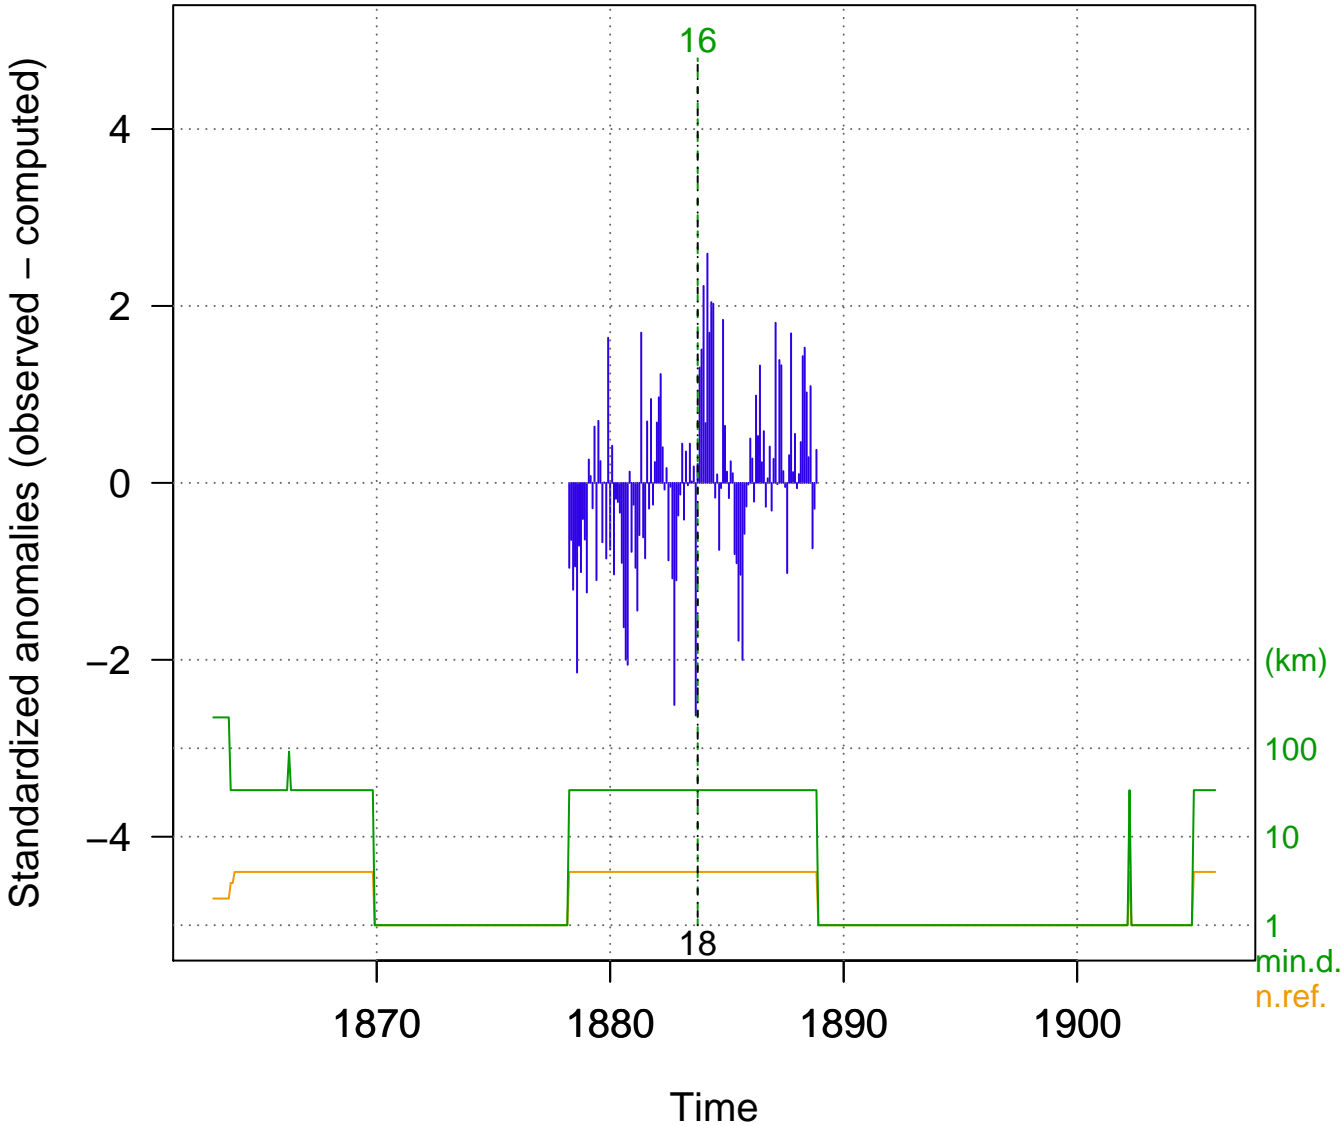

# RH 36 (Evora-3) Evora-3

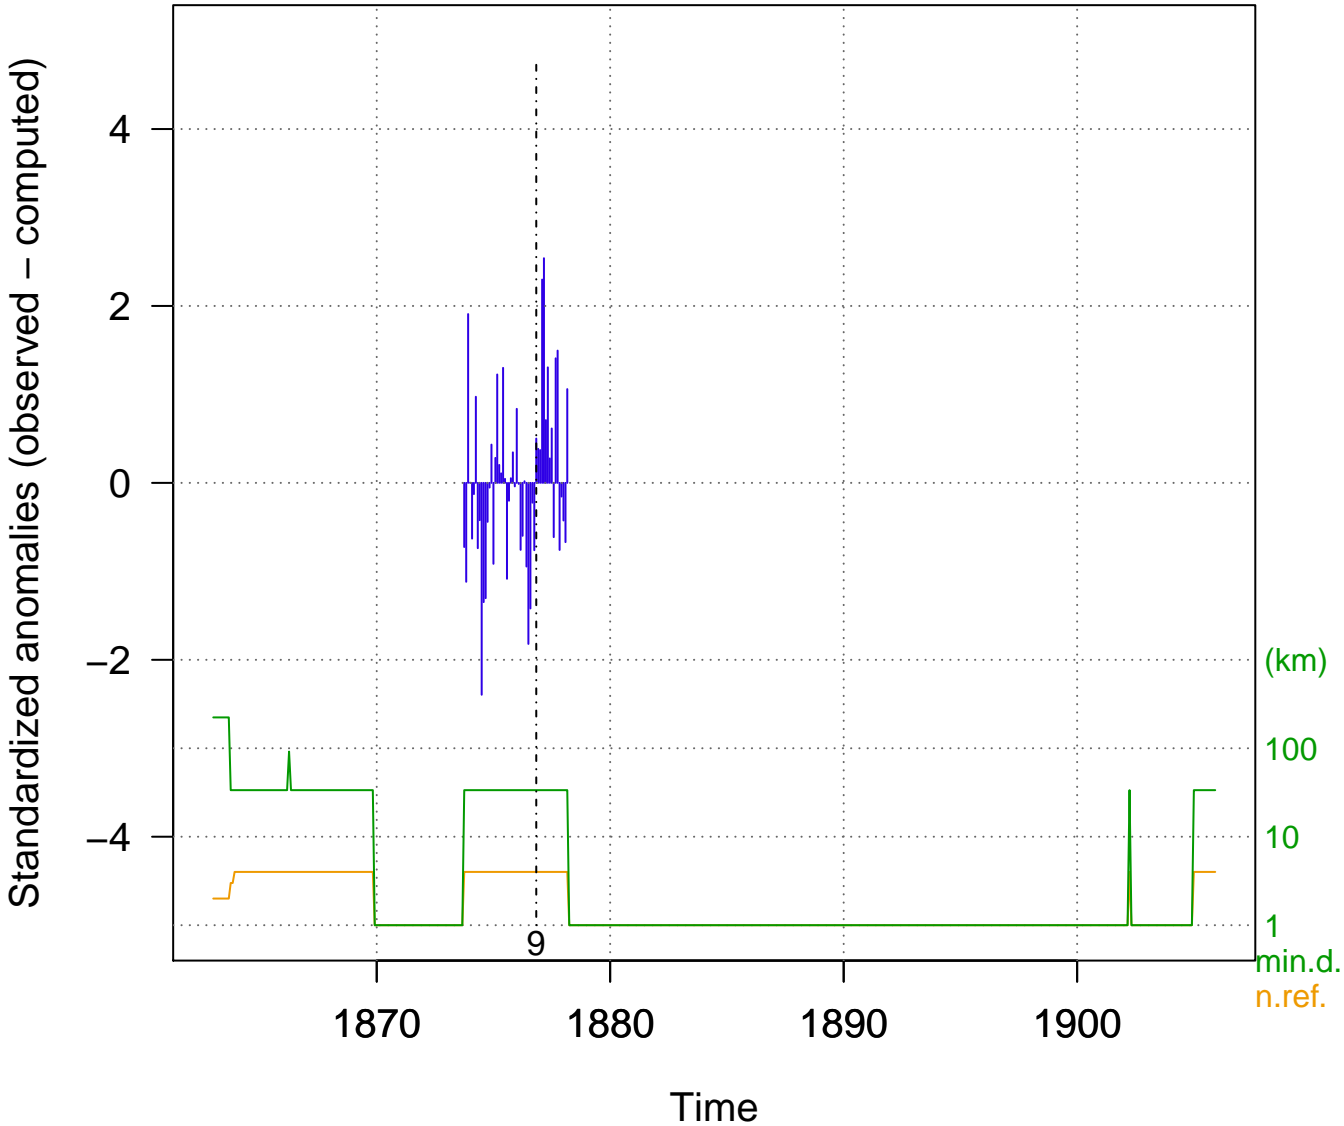

# RH 39 (Evora-4) Evora-4

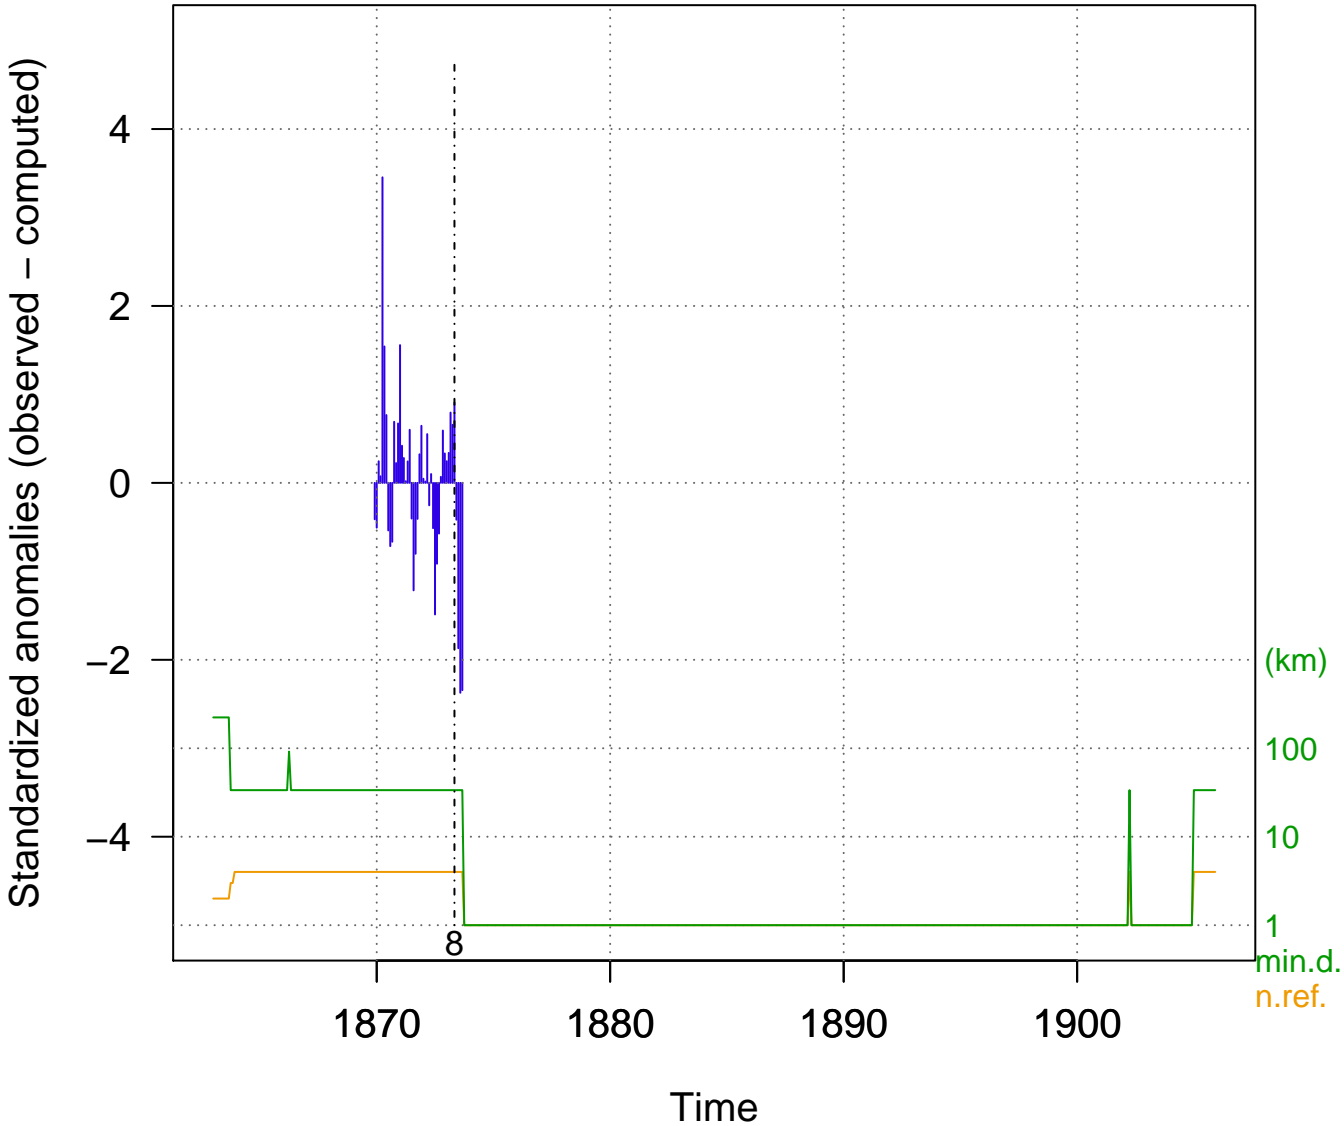

# RH 13 (Villa\_Fernando)

## Villa Fernando

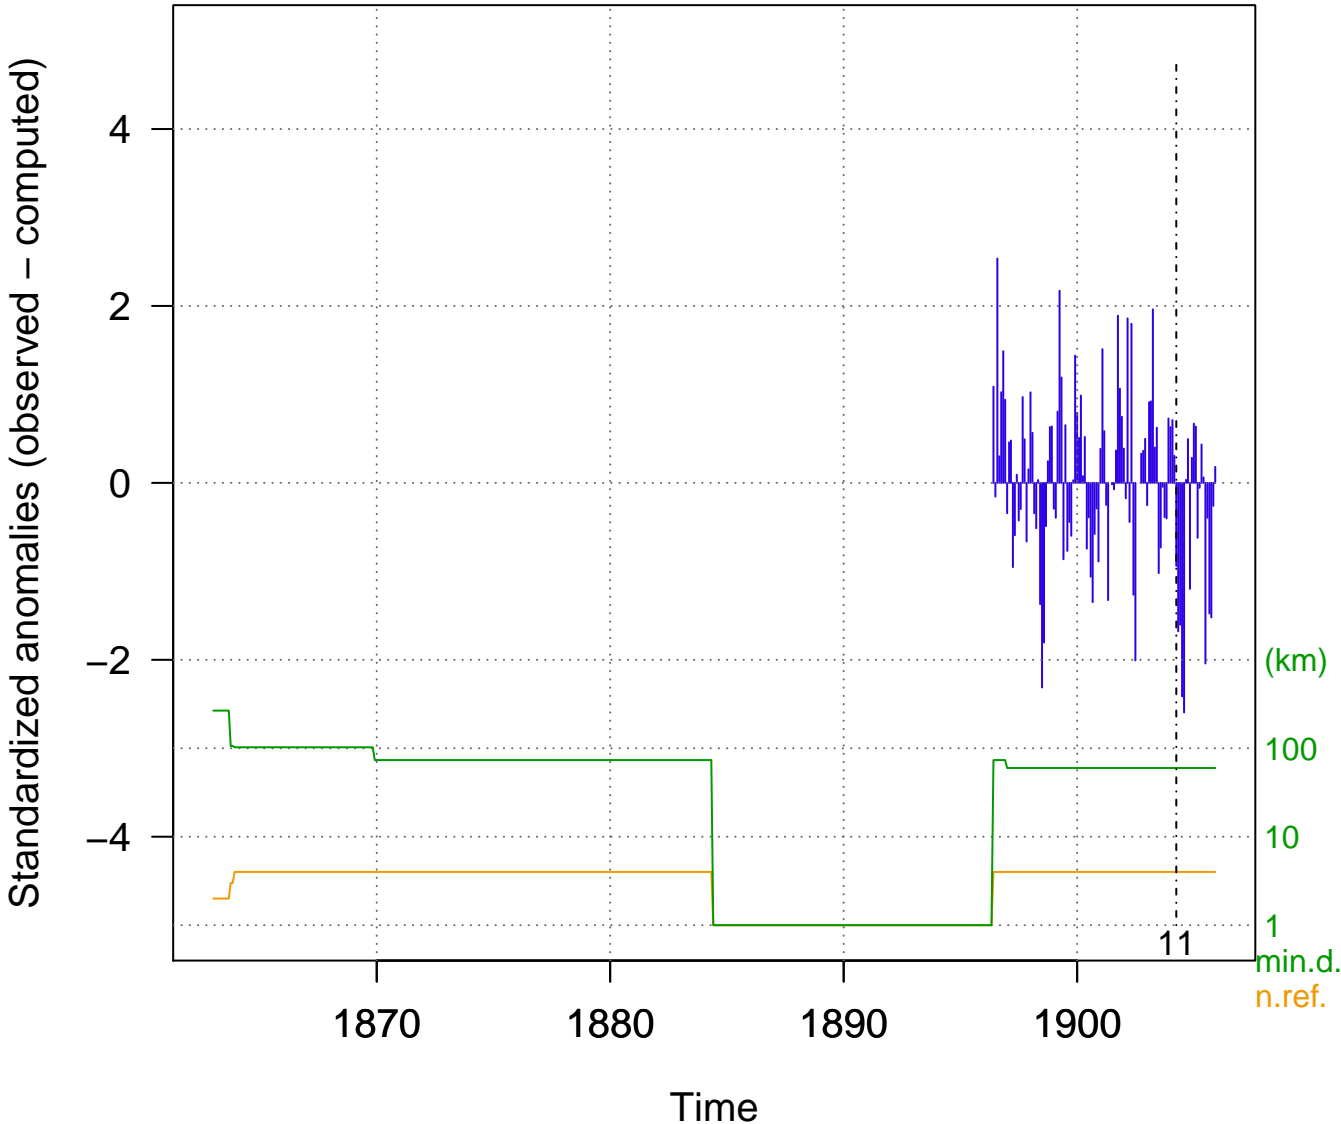

# RH 40 (Villa\_Fernando-2)

## Villa Fernando-2

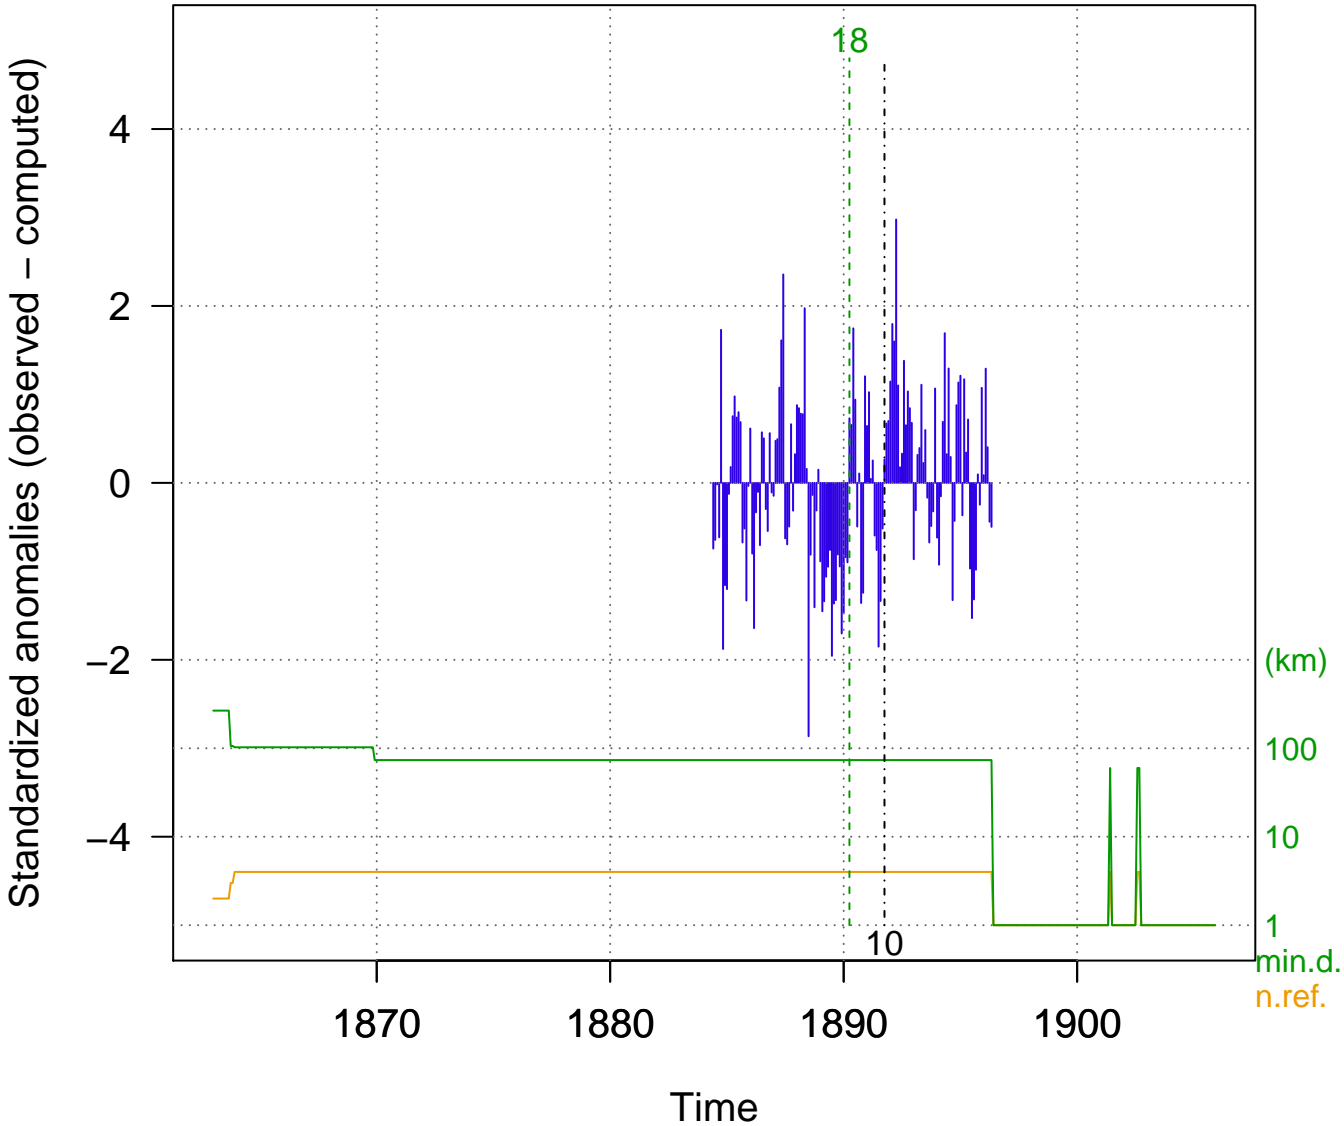

# RH 14 (Beja) Beja

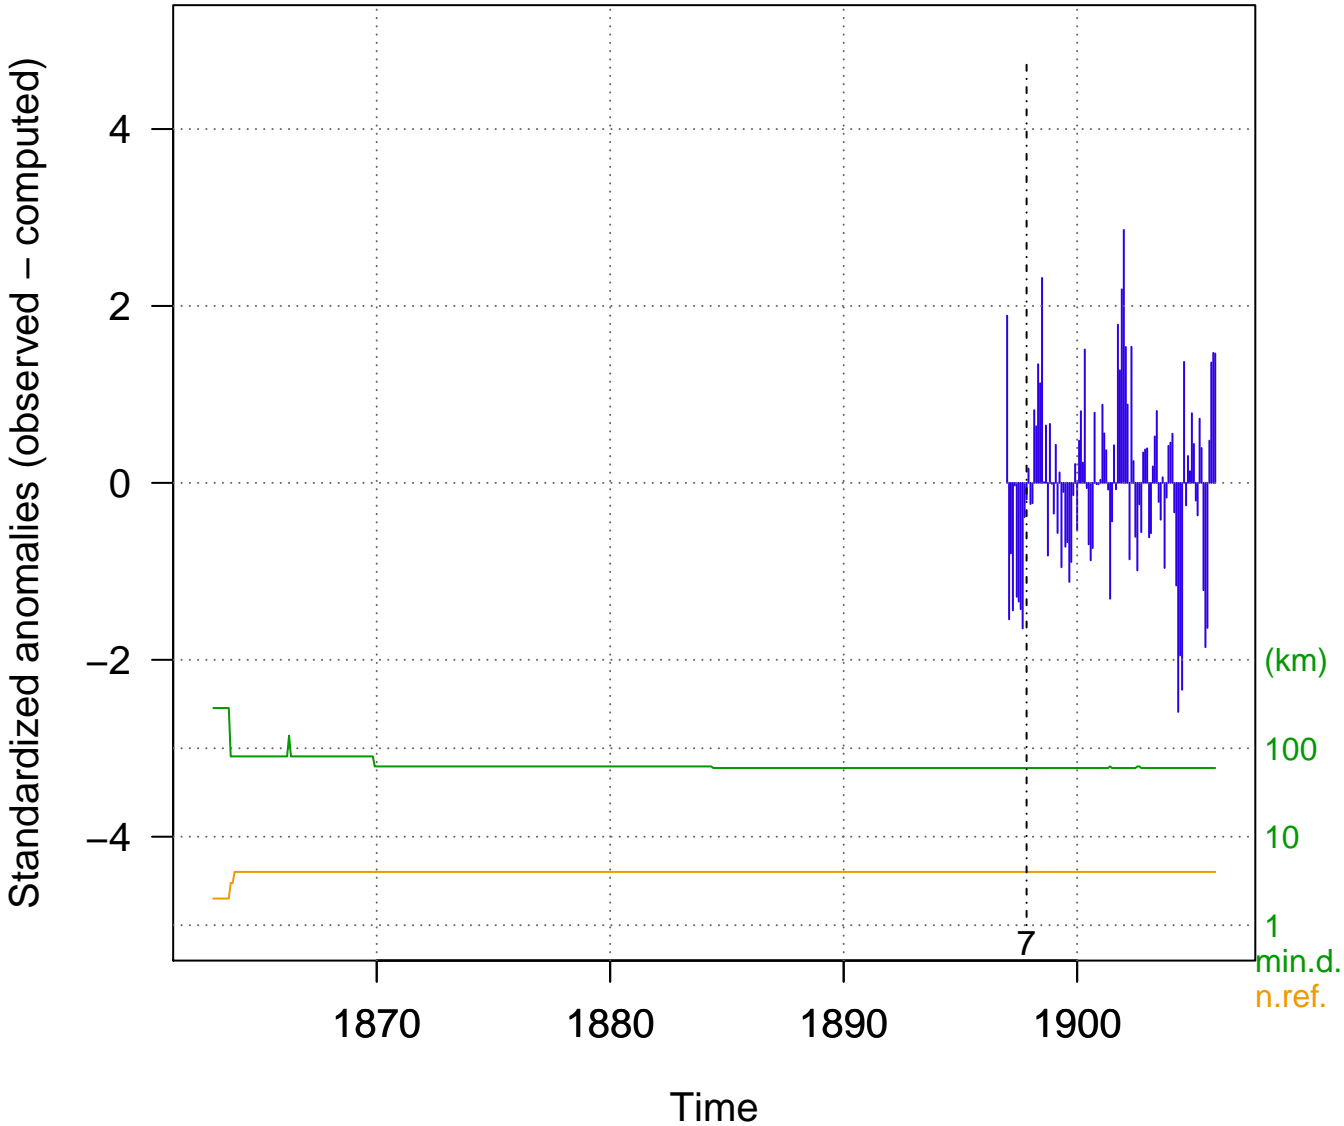



# RH 15 (Ponta\_Delgada) Ponta Delgada

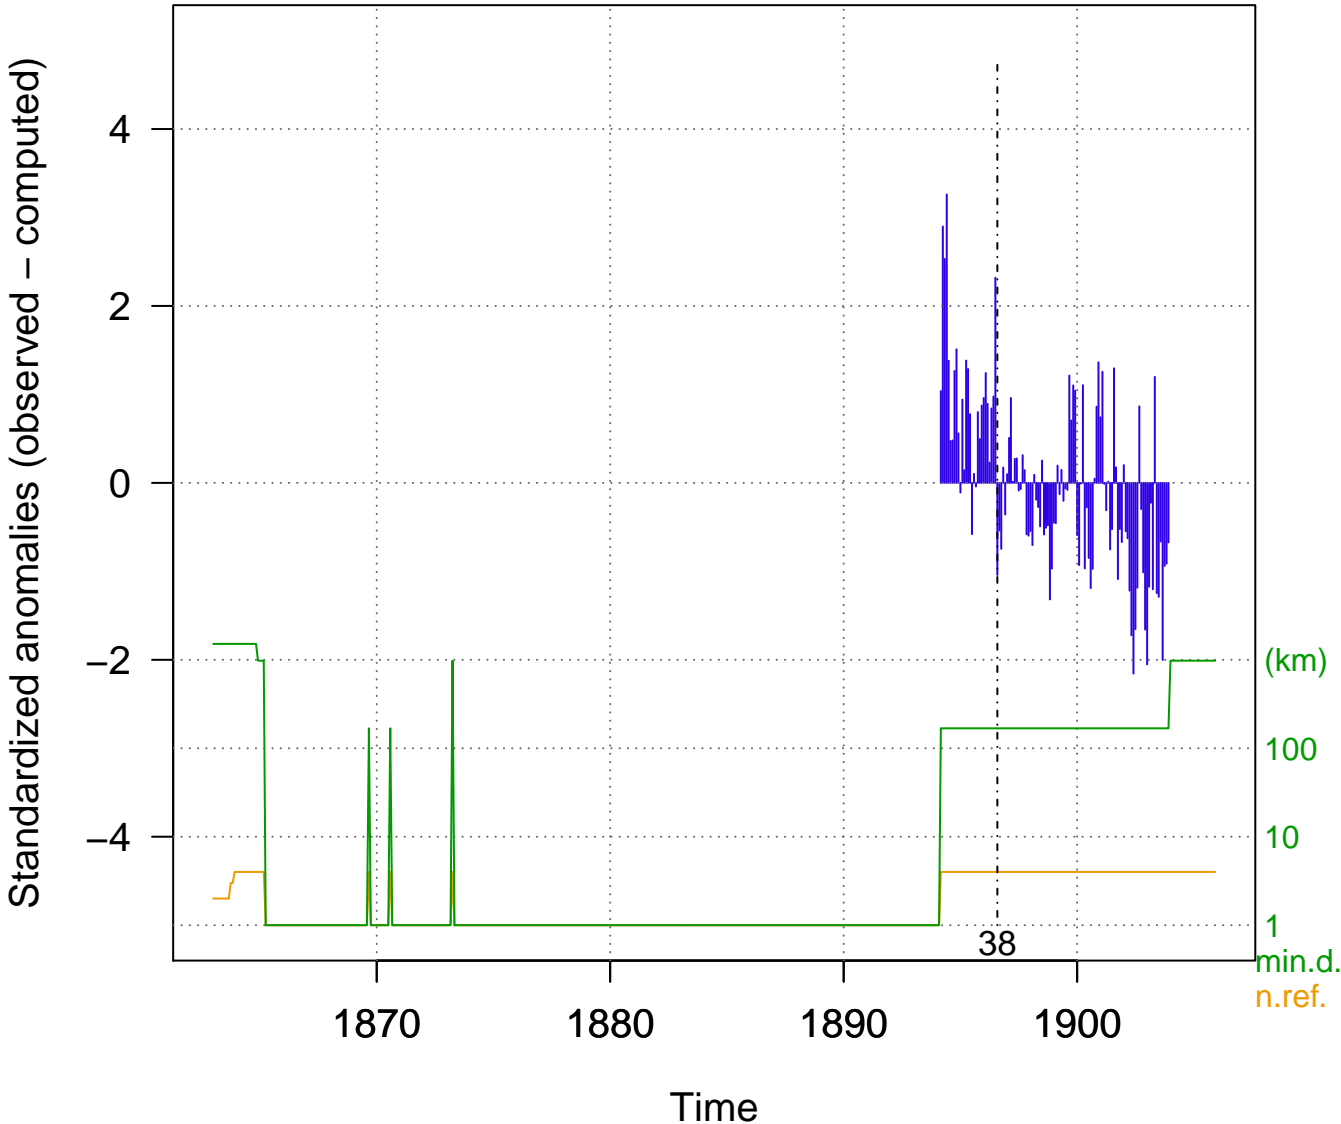

# RH 24 (Ponta\_Delgada-2) Ponta Delgada-2

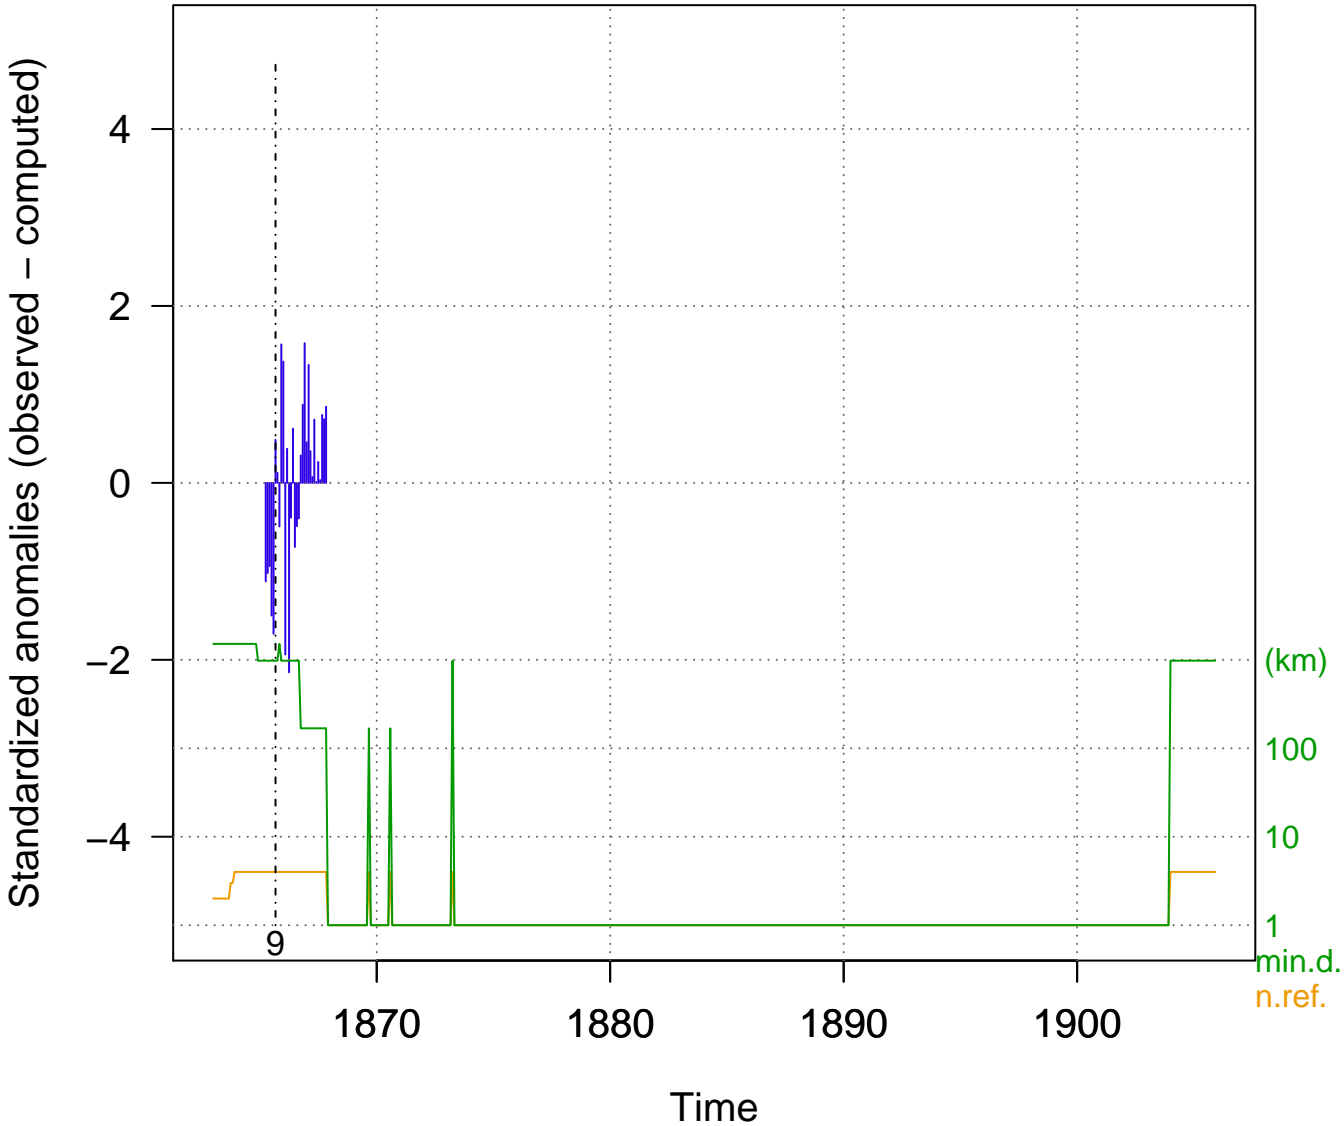

# RH 33 (Ponta\_Delgada-3) Ponta Delgada-3

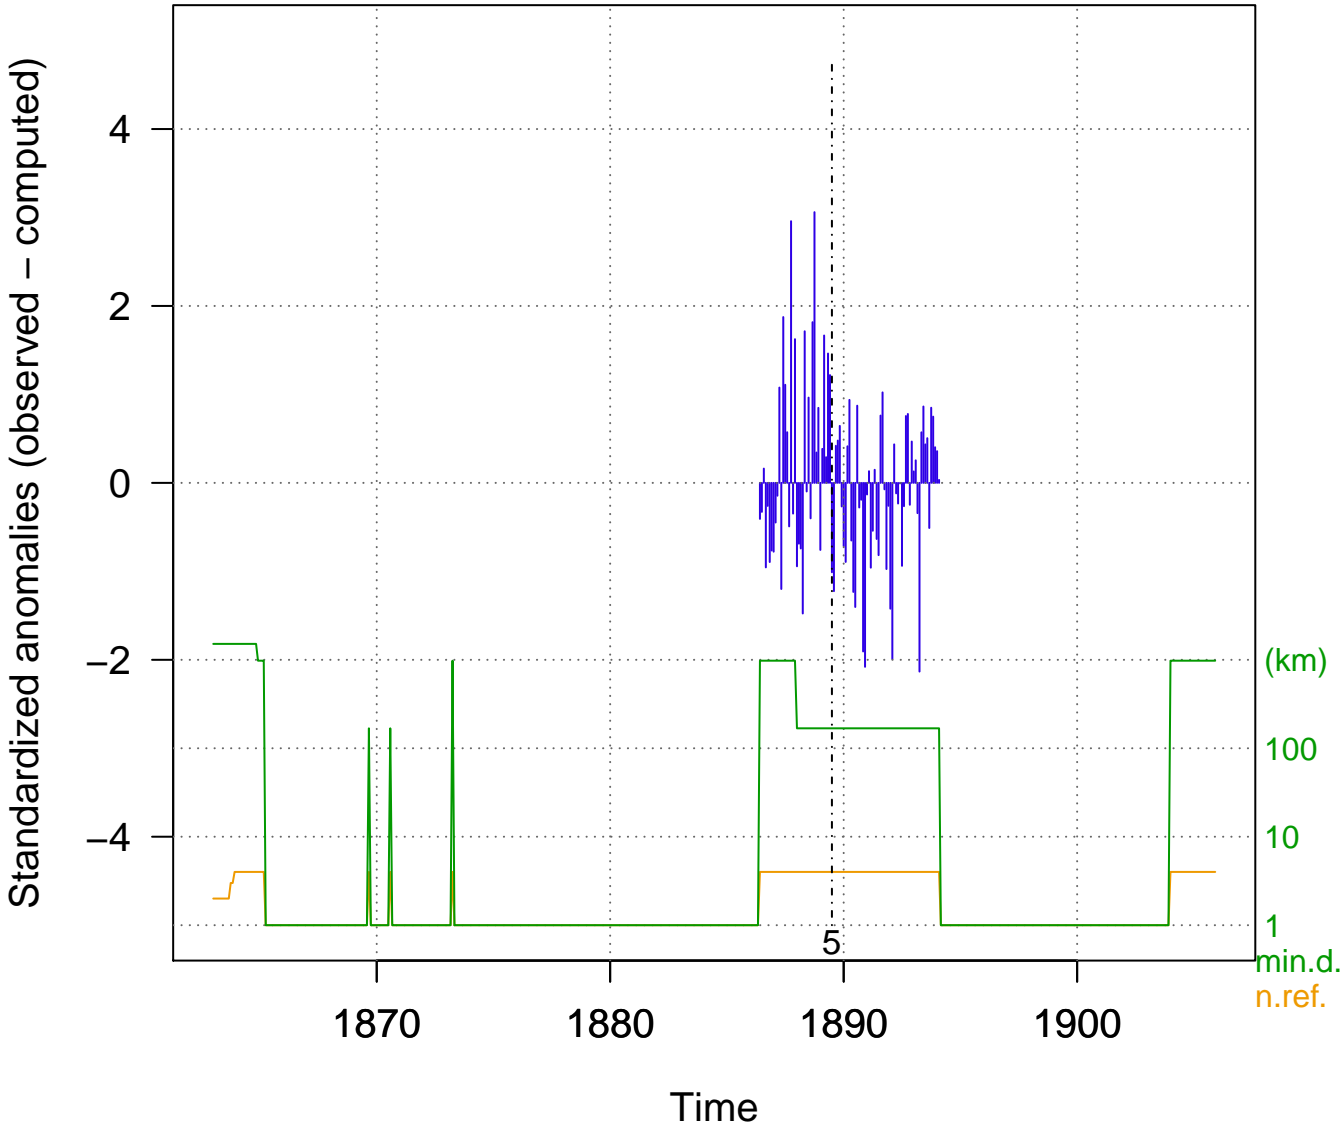

# RH 38 (Ponta\_Delgada-4) Ponta Delgada-4

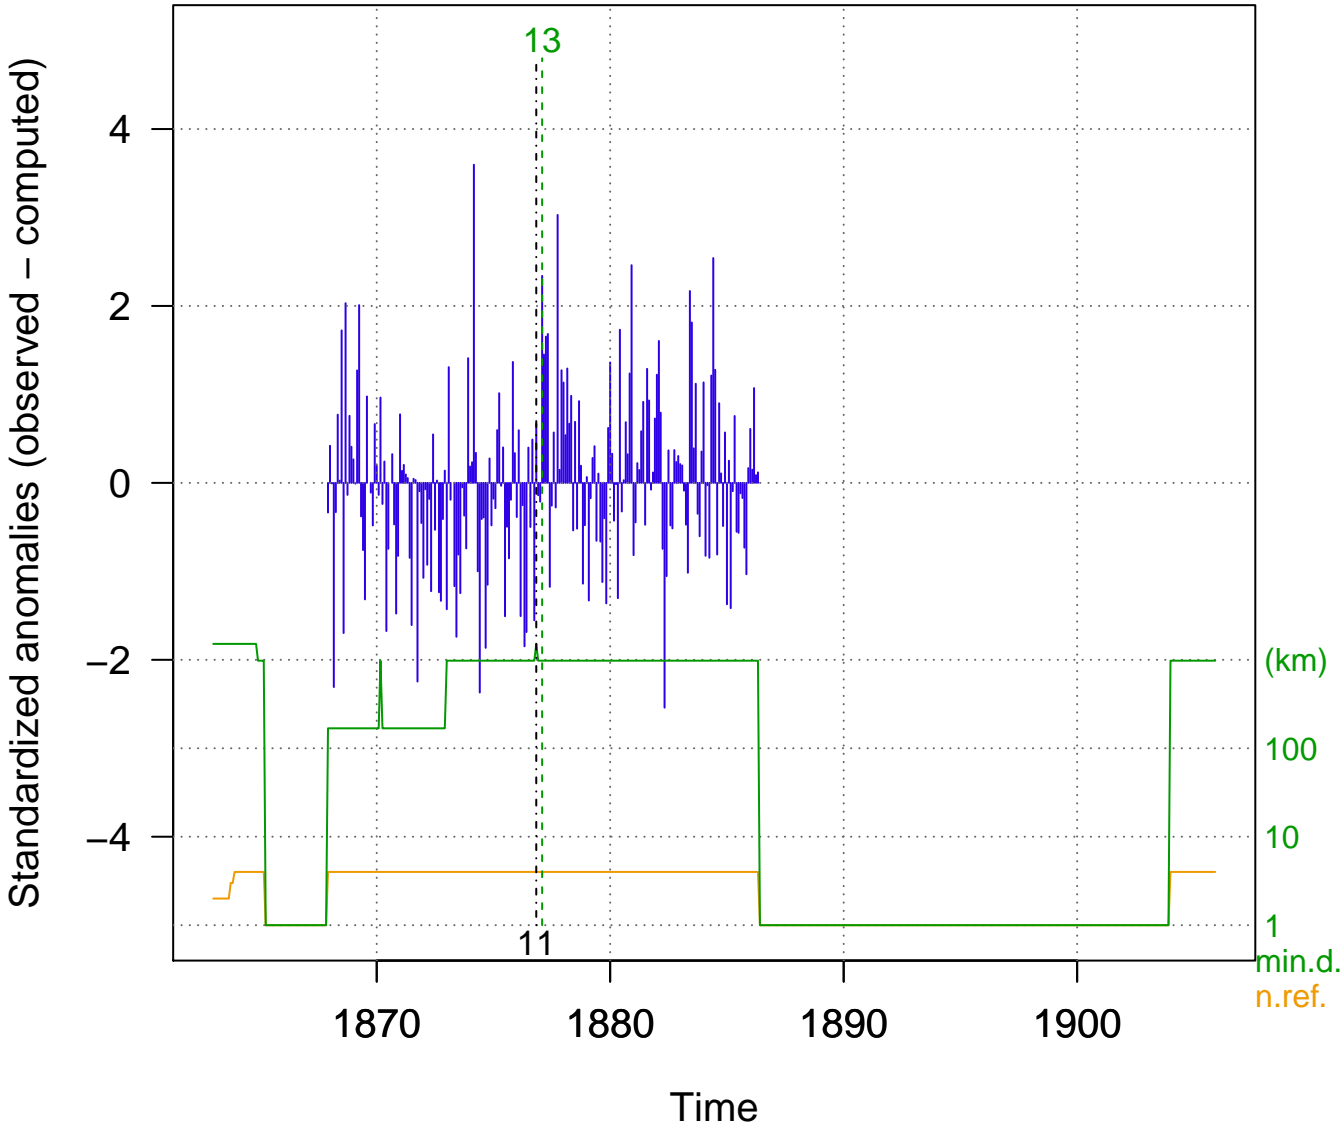

# RH 16 (Lagos) Lagos

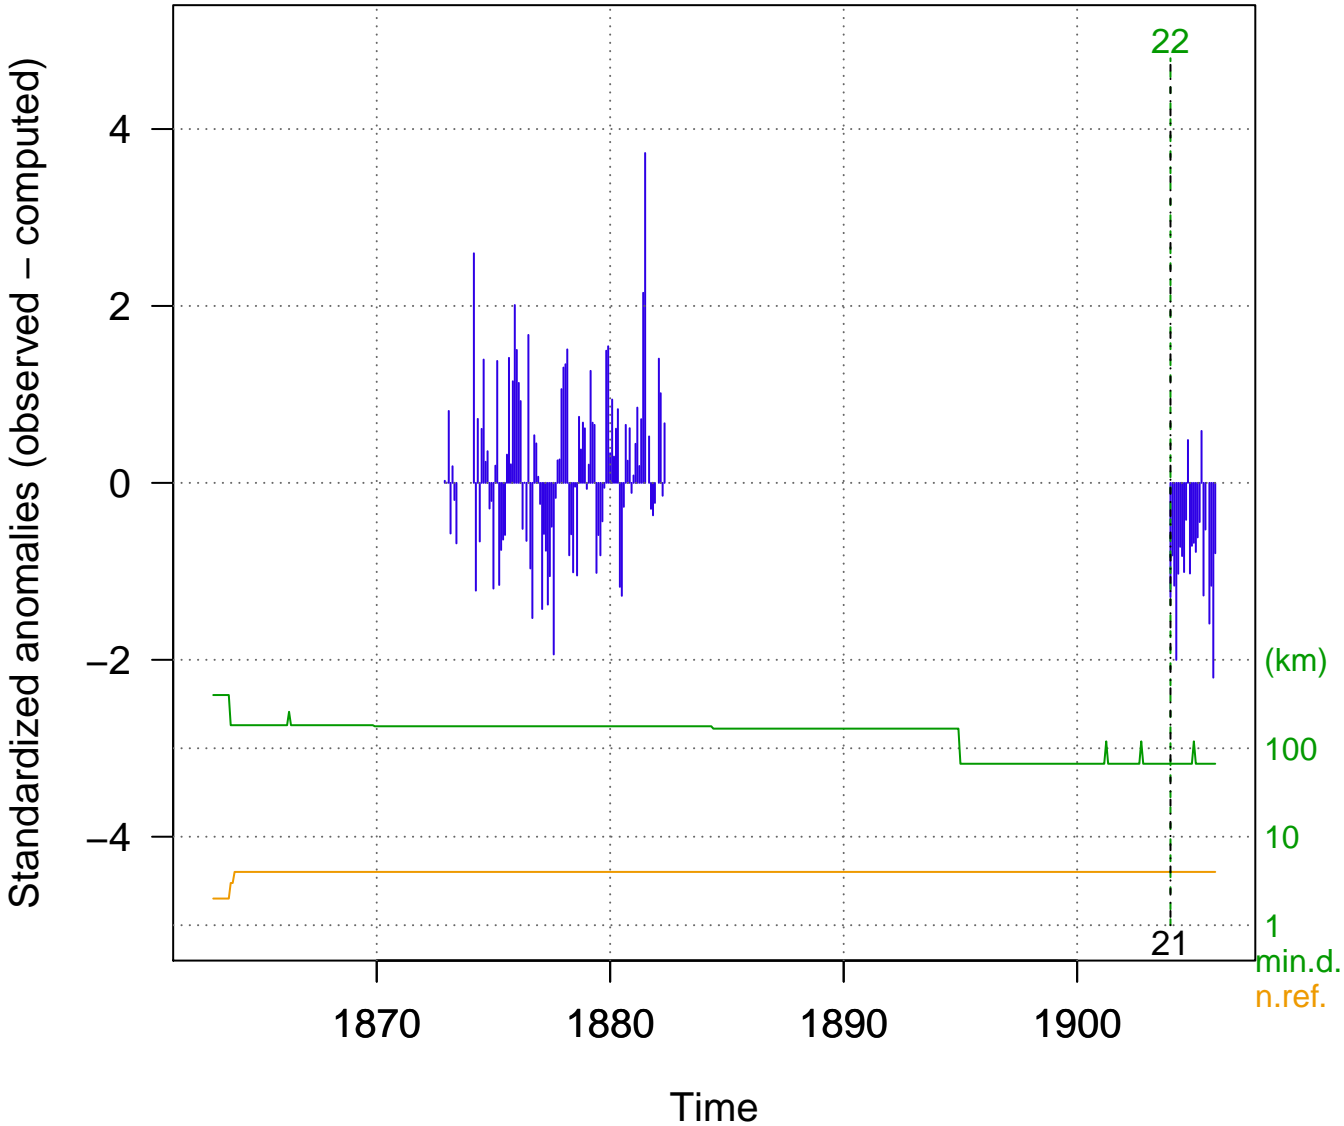

# RH 17 (Faro) Faro

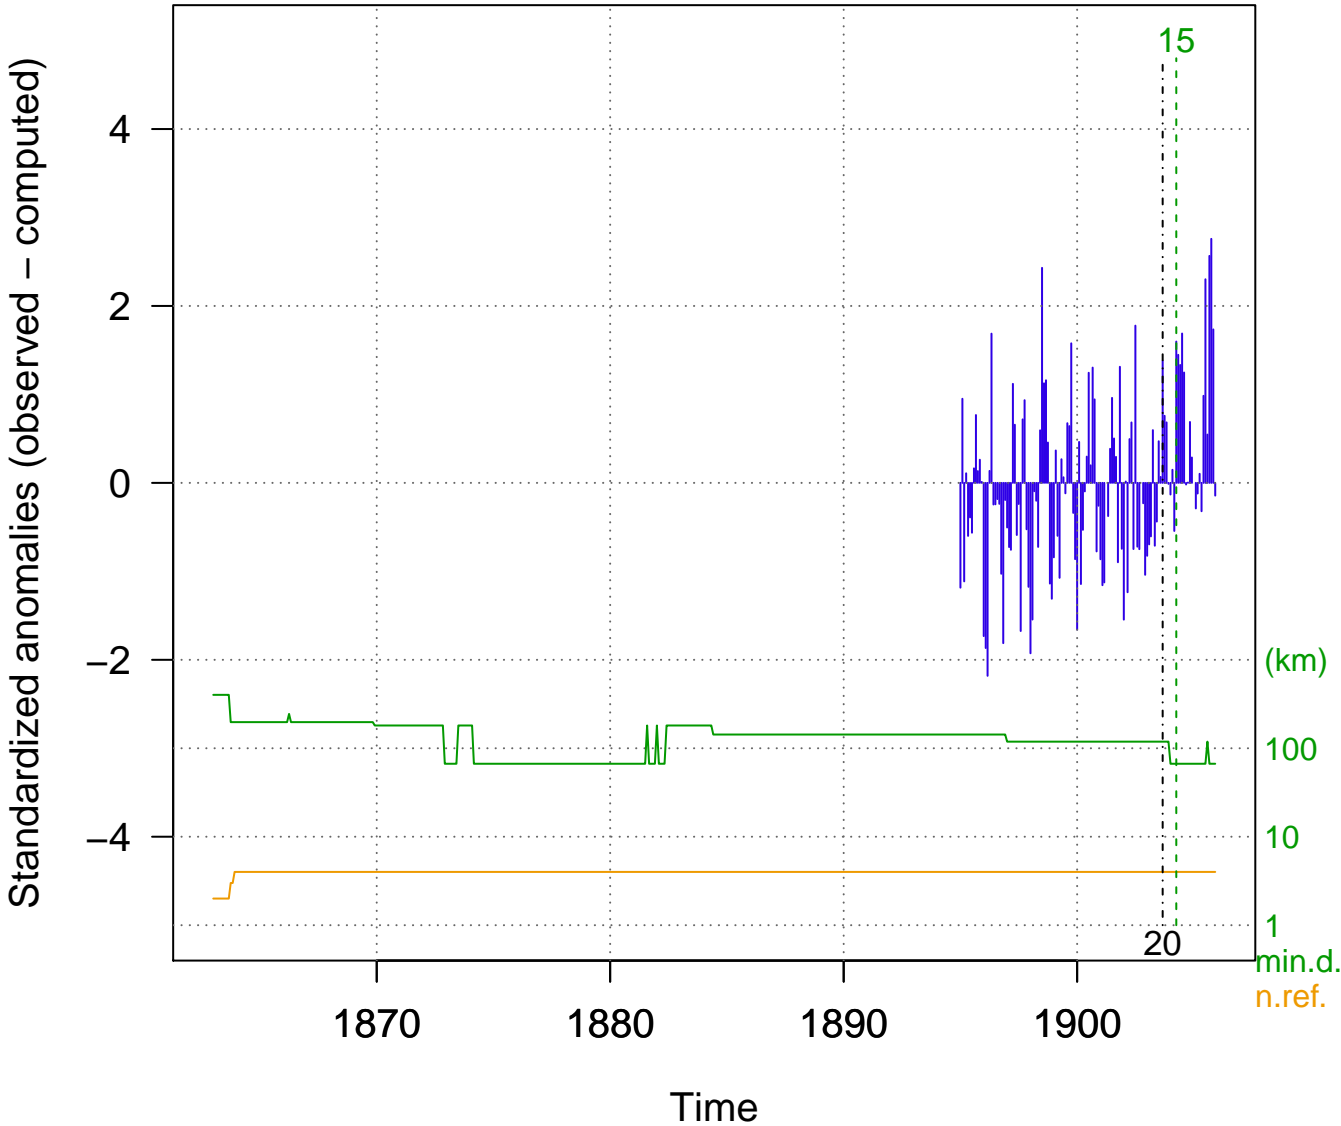

# RH 18 (Funchal) Funchal

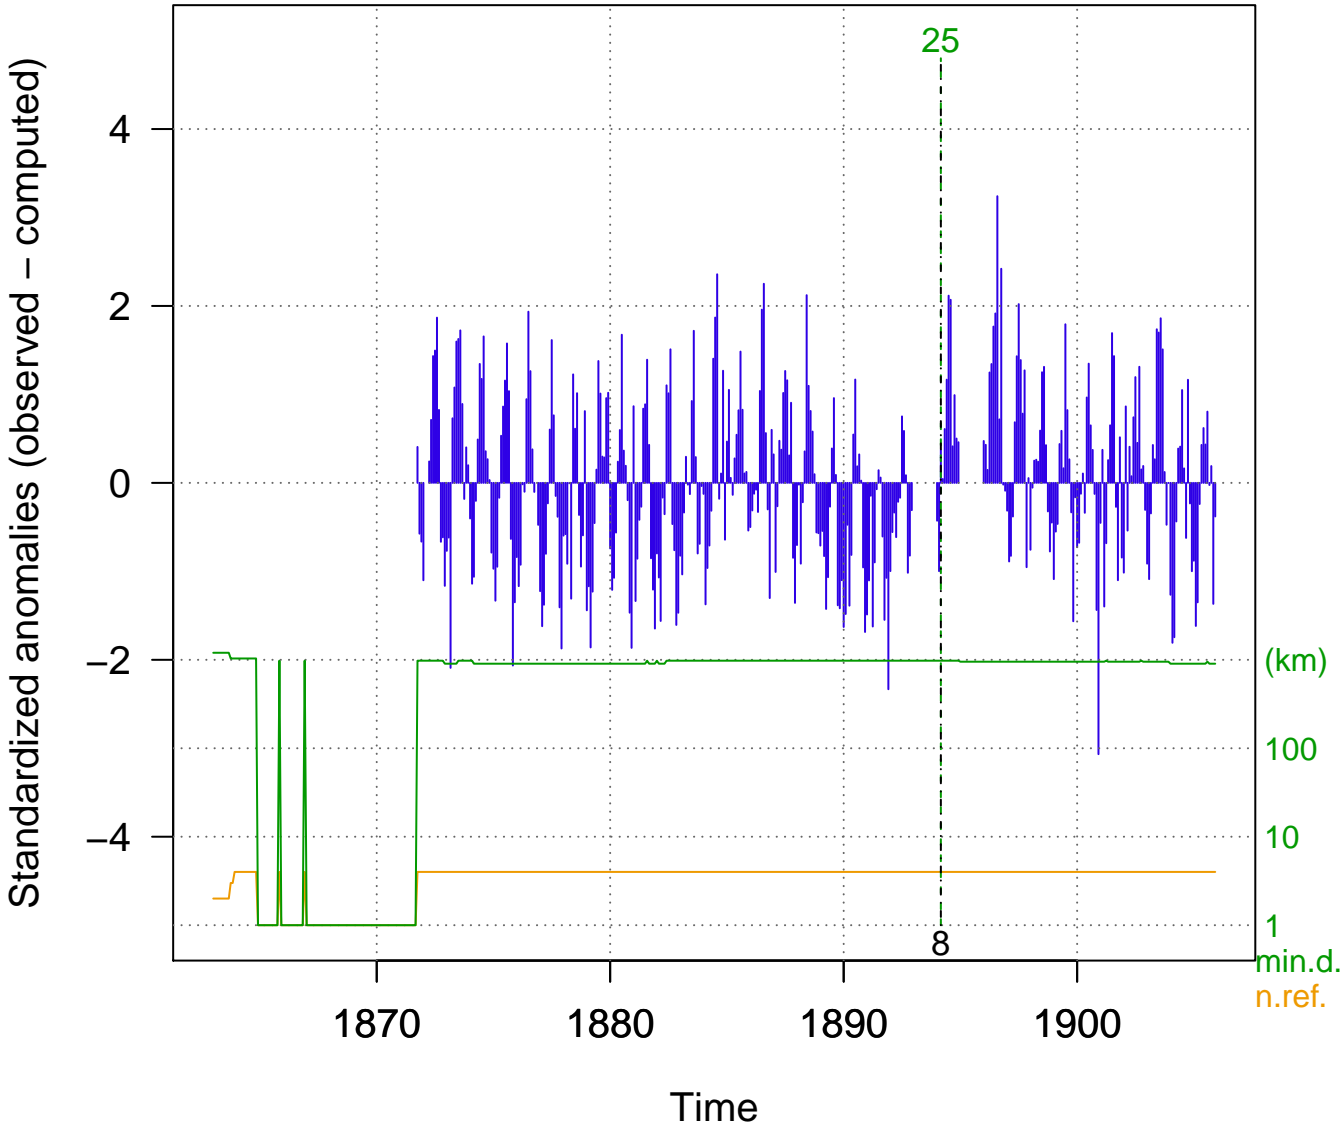

# RH 37 (Funchal-2) Funchal-2

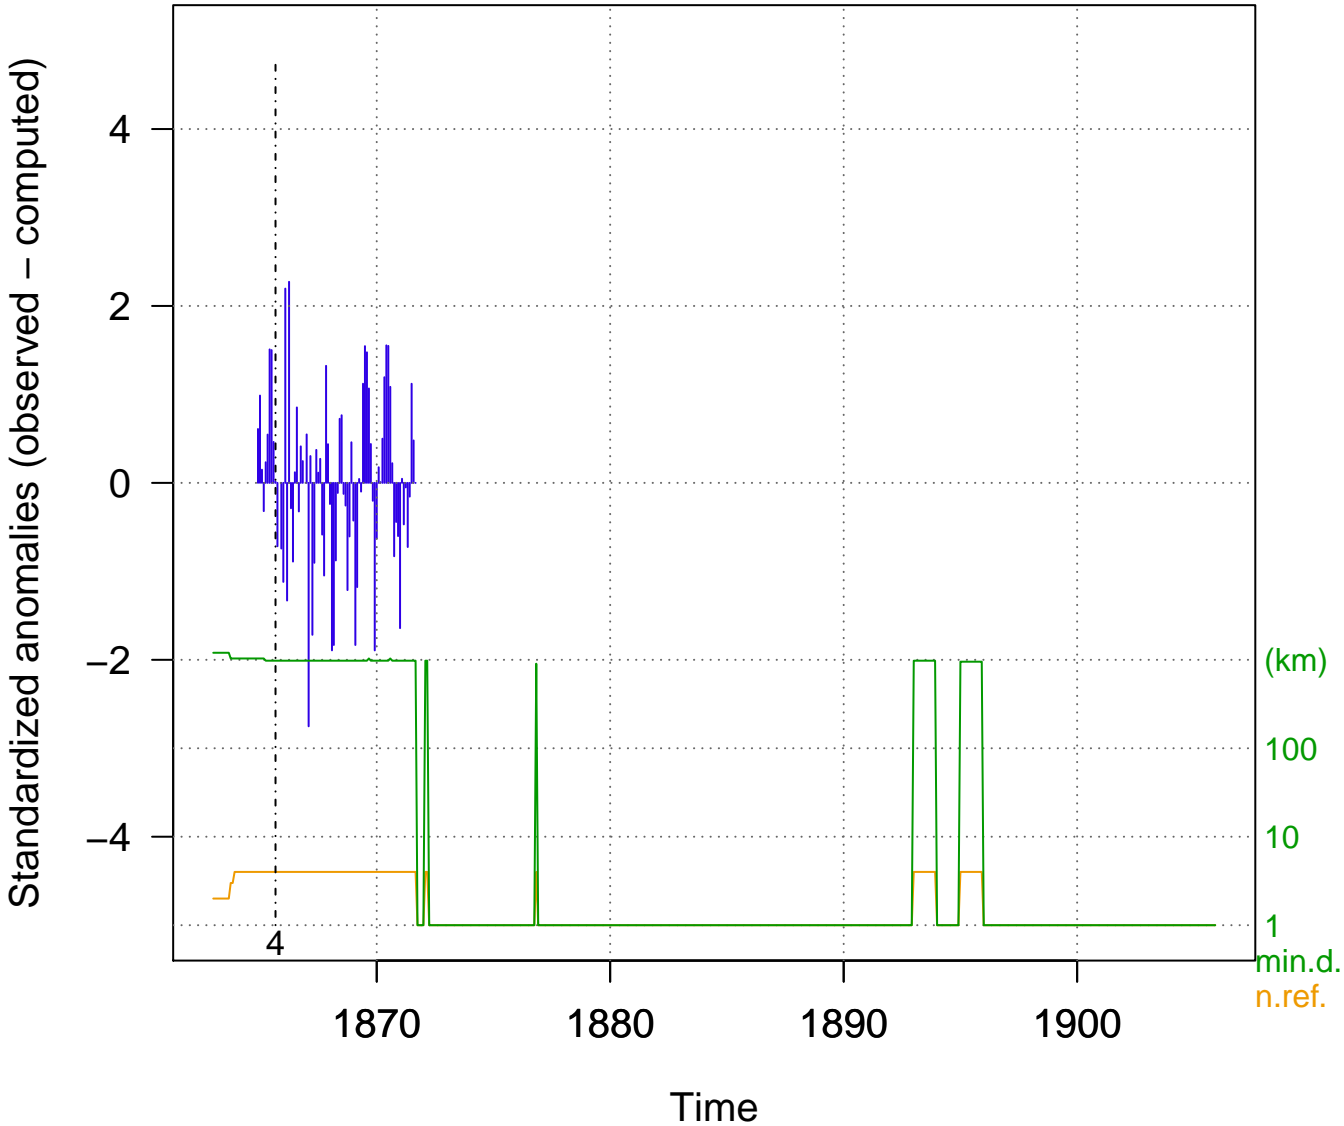



# RH 19 (S.\_Vicente) S. Vicente

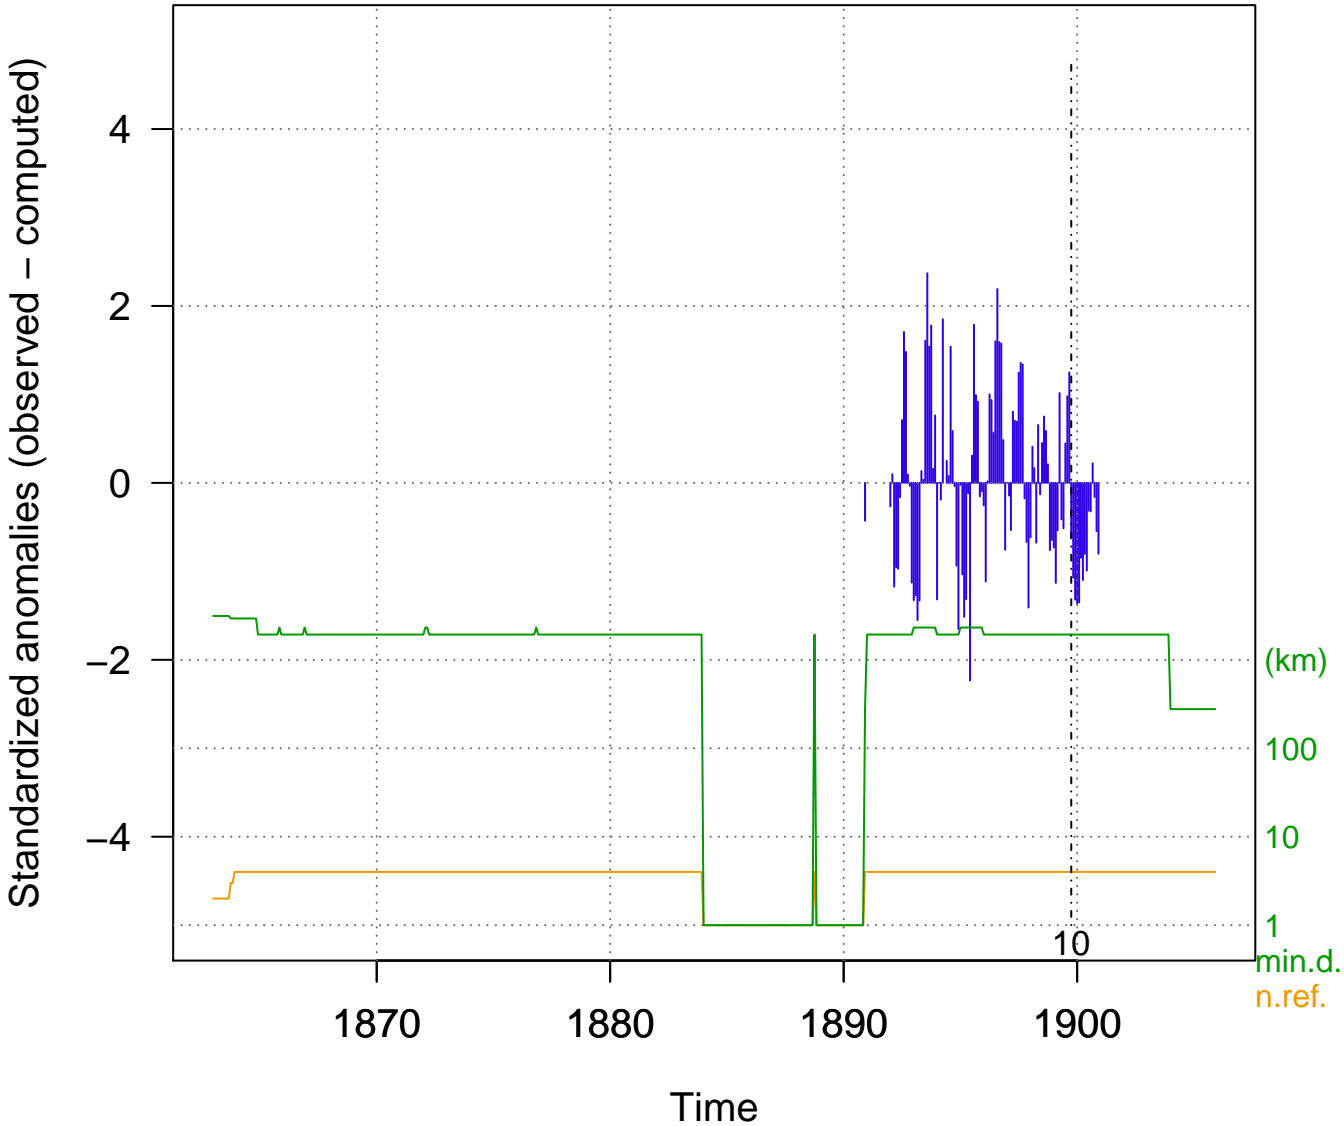

**RH 31 (S.\_Vicente-2)**  
**S. Vicente-2**

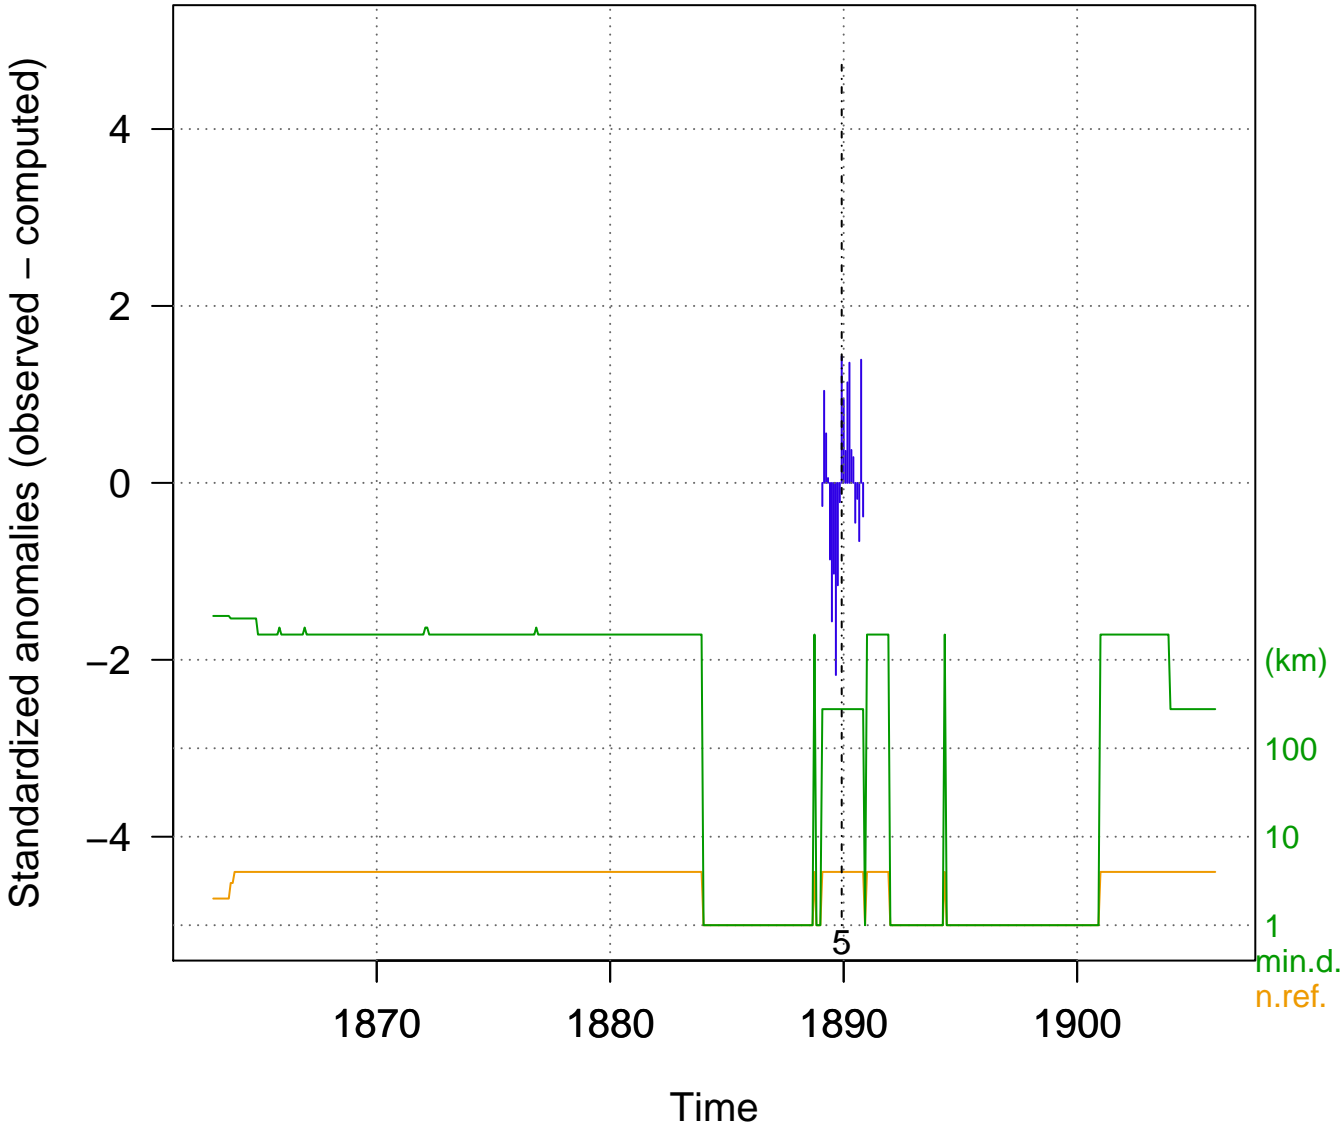

**RH 41 (S.\_Vicente-3)**  
**S. Vicente-3**

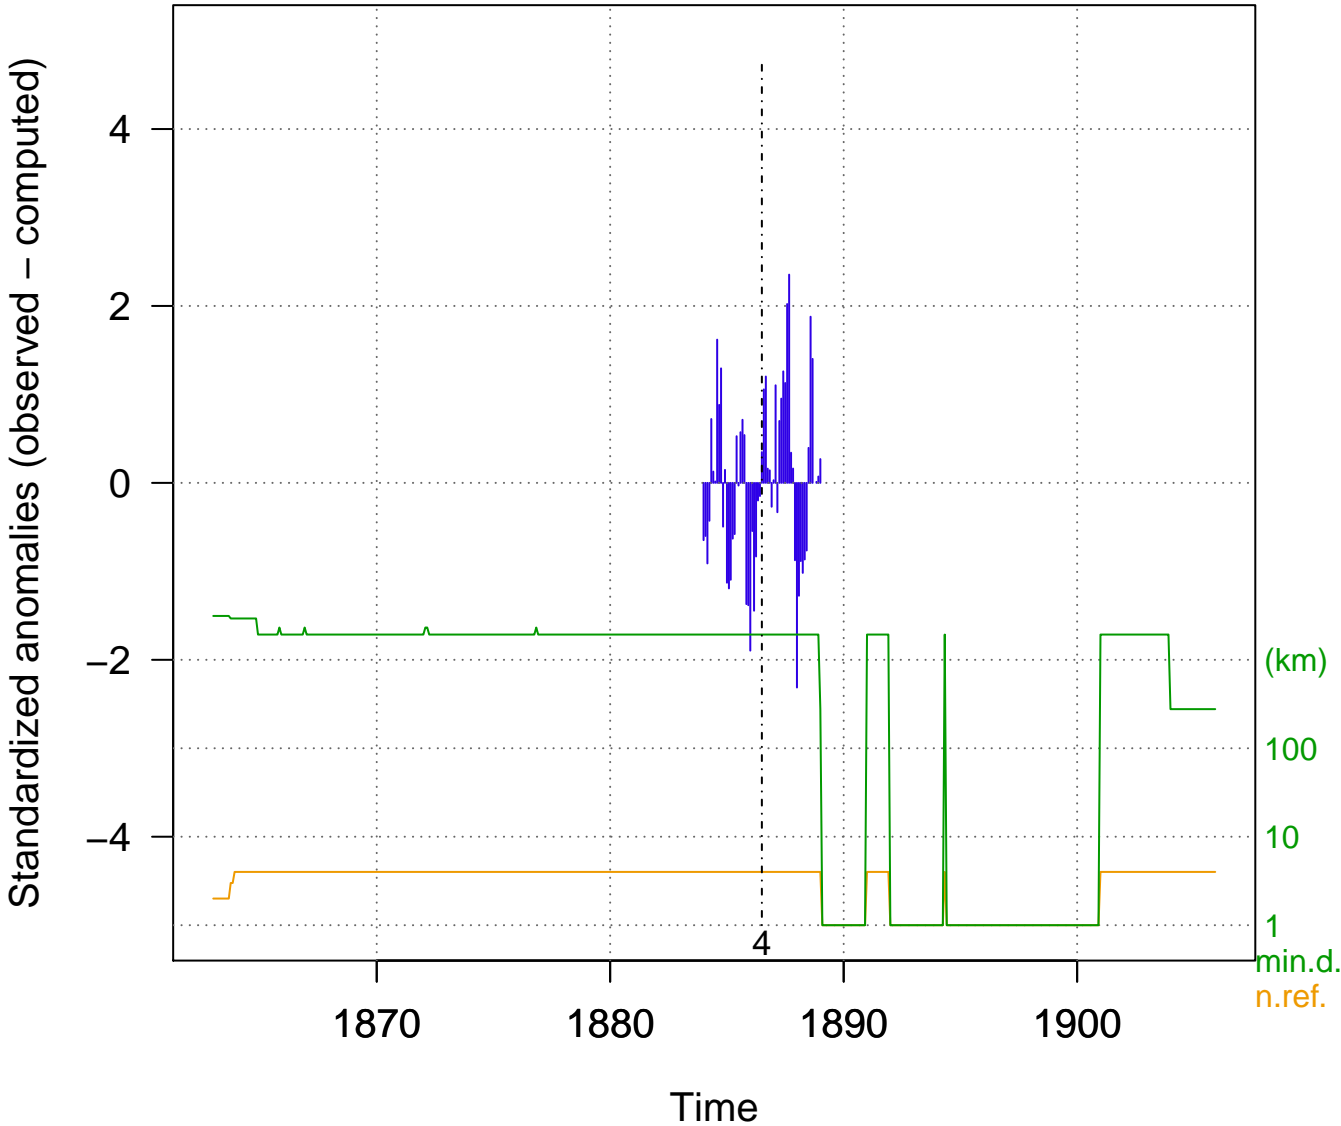

RH 20 (Cidade\_da\_Praia)  
Cidade da Praia

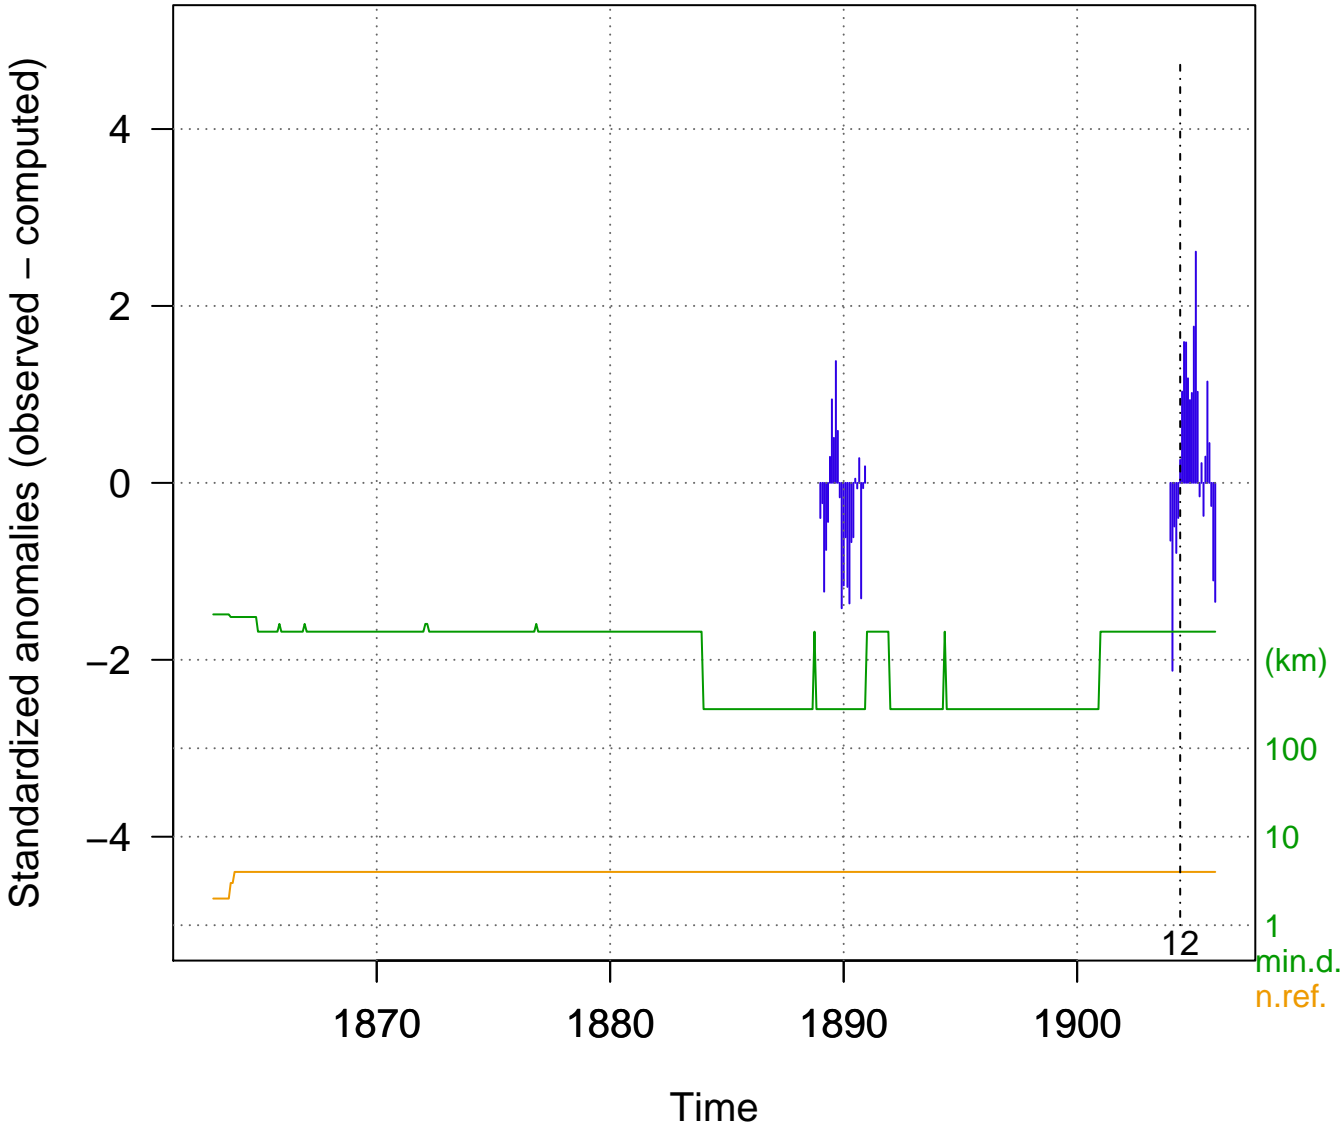

RH 21 (S.\_Thome)  
S. Thome

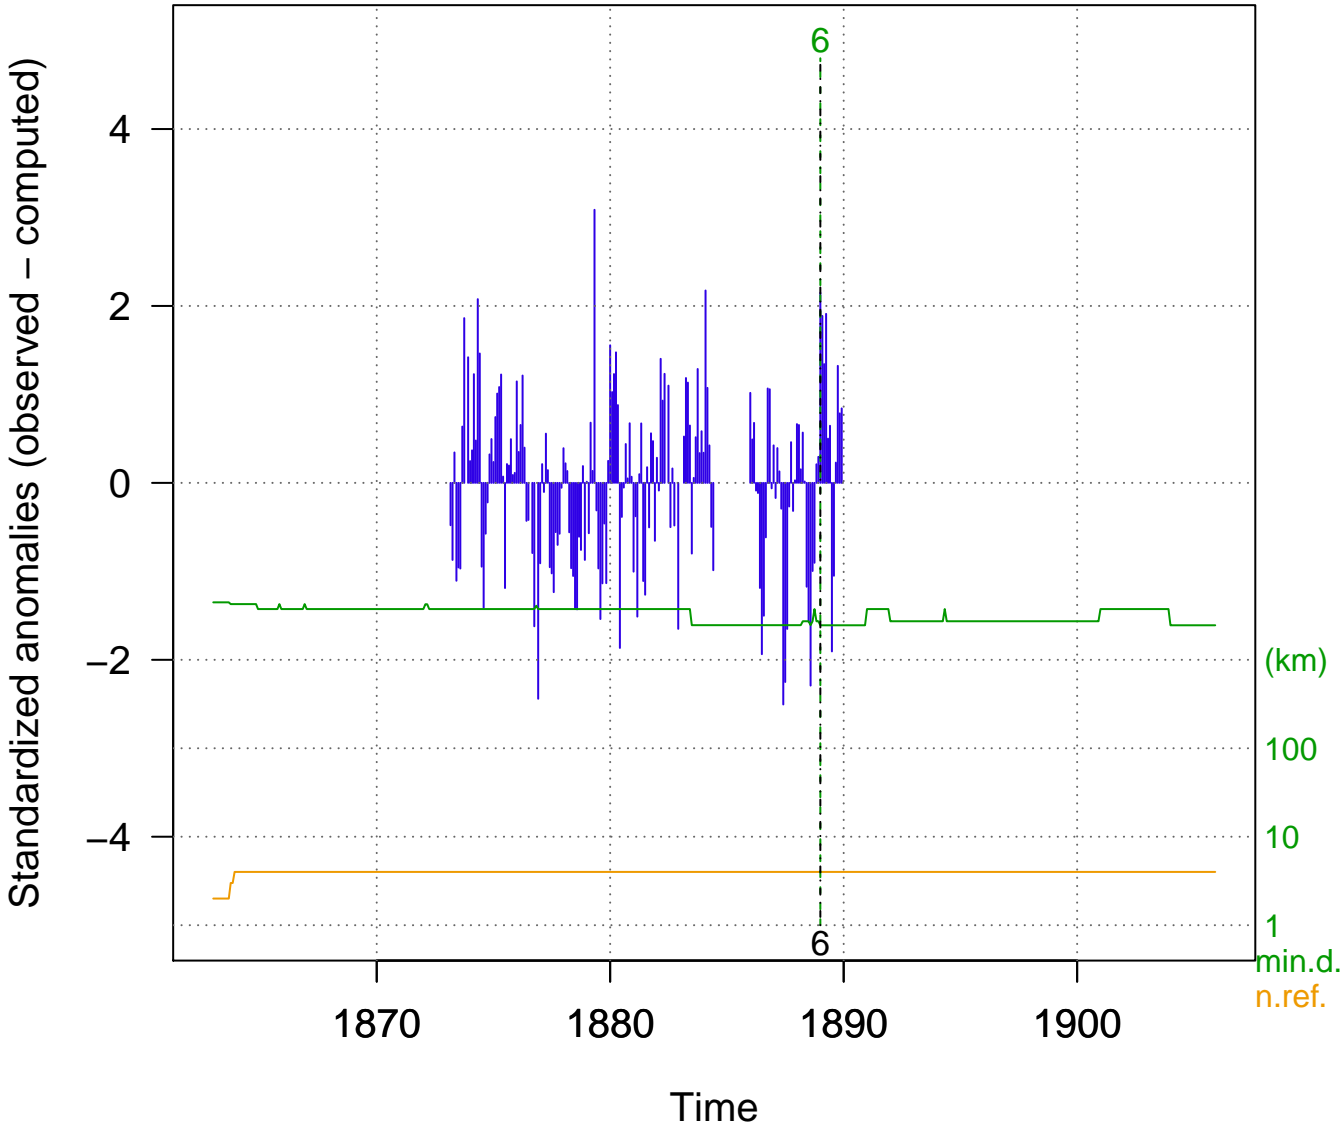

RH 22 (S.\_Salvador\_do\_Congo)  
S. Salvador do Congo

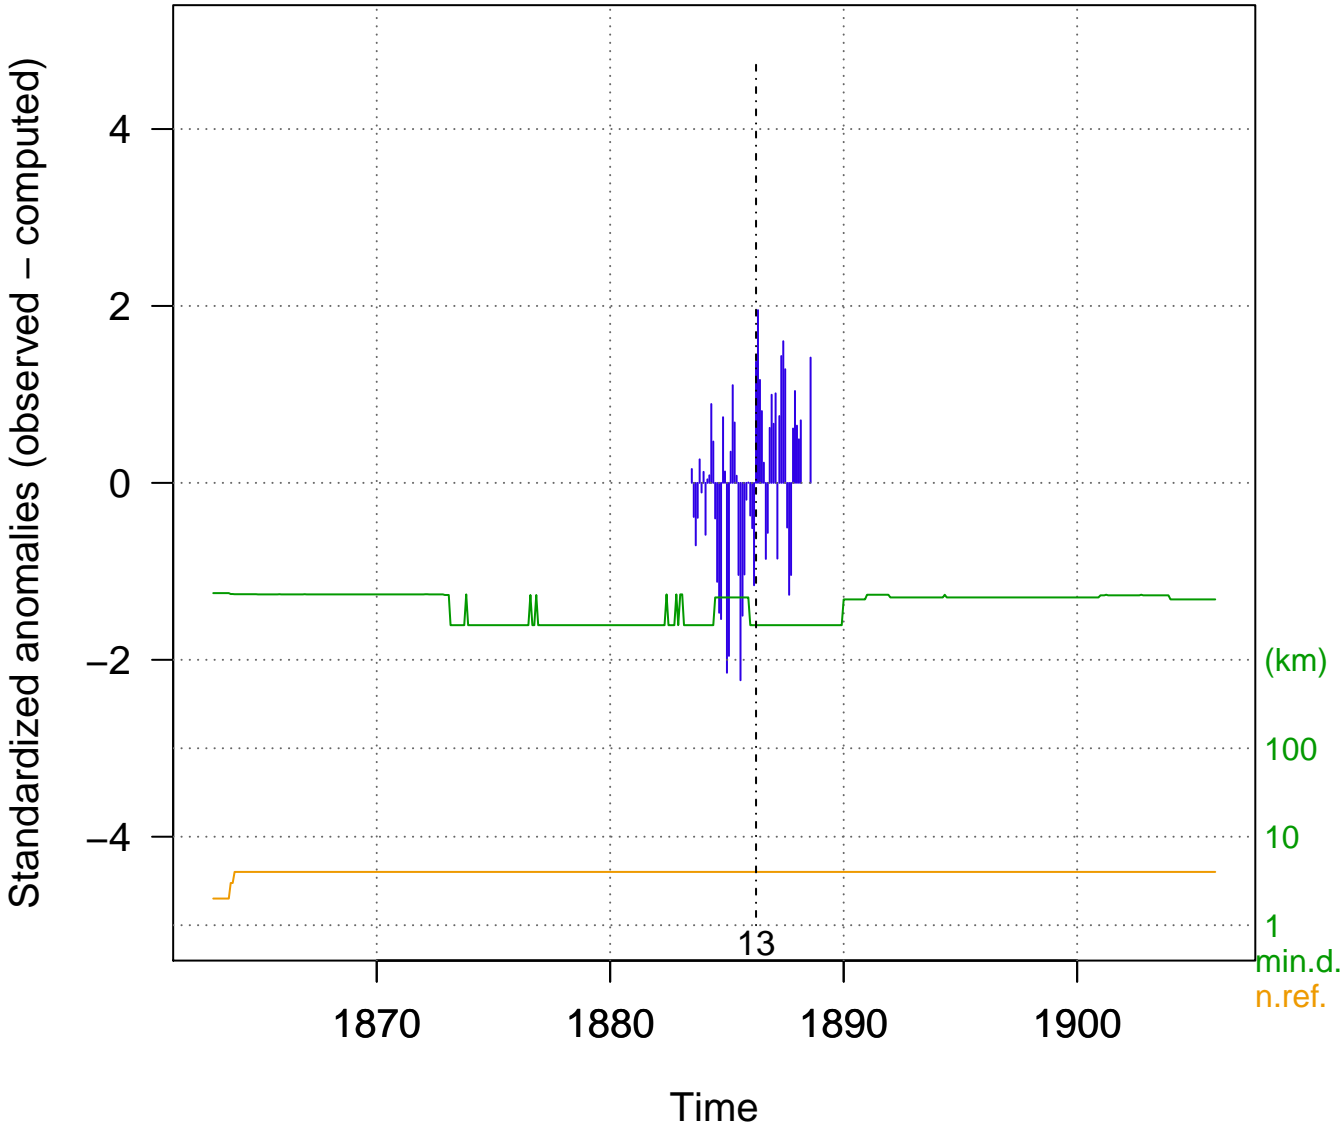

# Final graphics

Adjusted series and  
applied corrections

# RH 1 (Montalegre) Montalegre

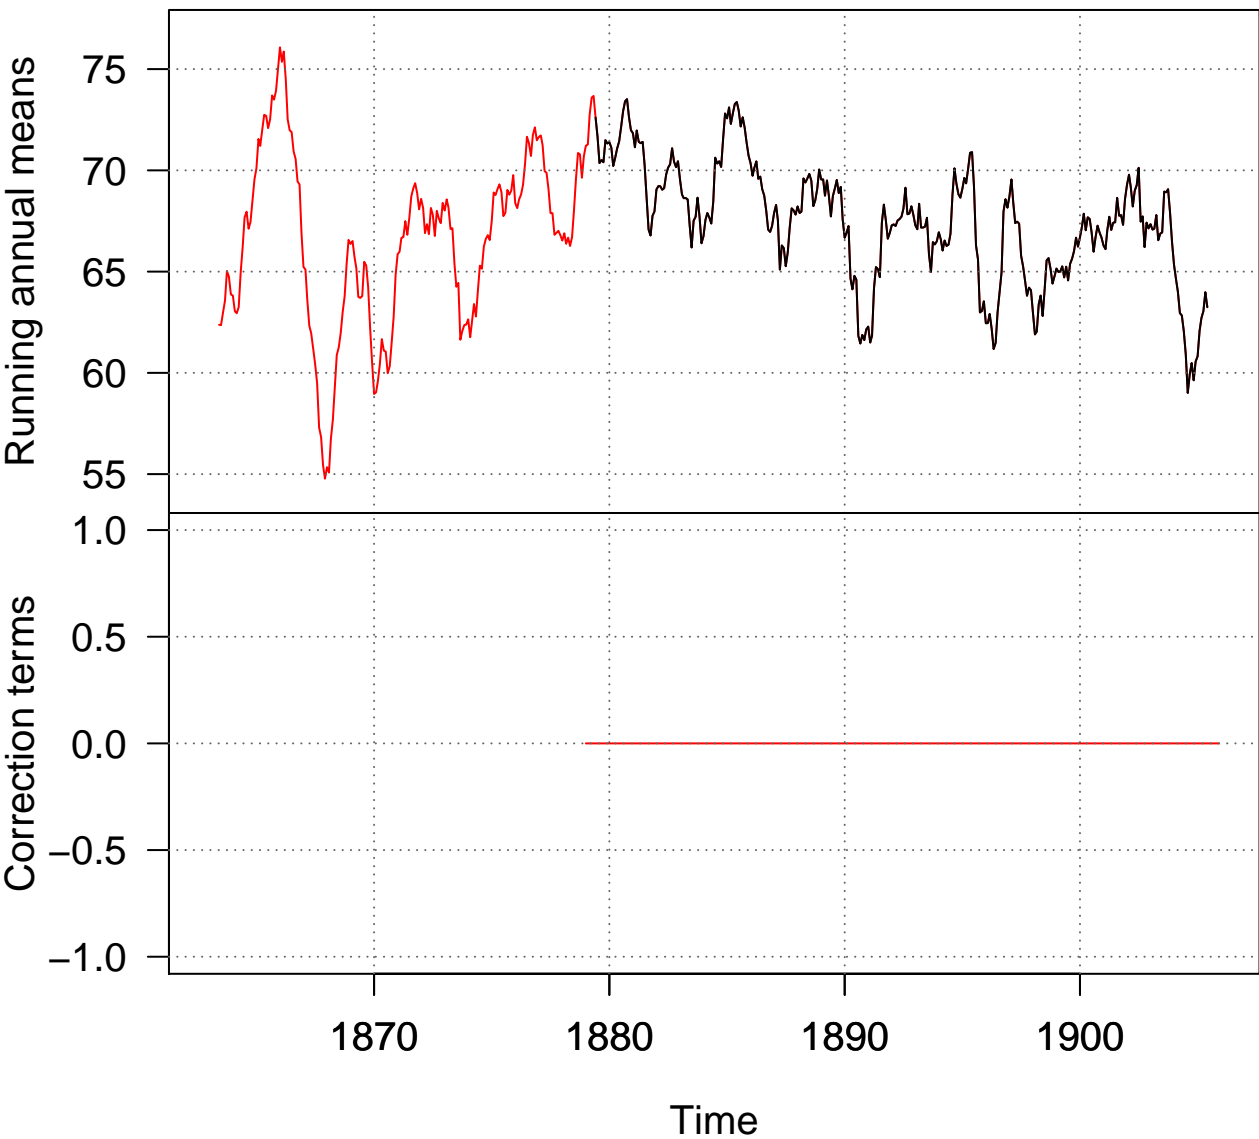



# RH 2 (Moncorvo) Moncorvo

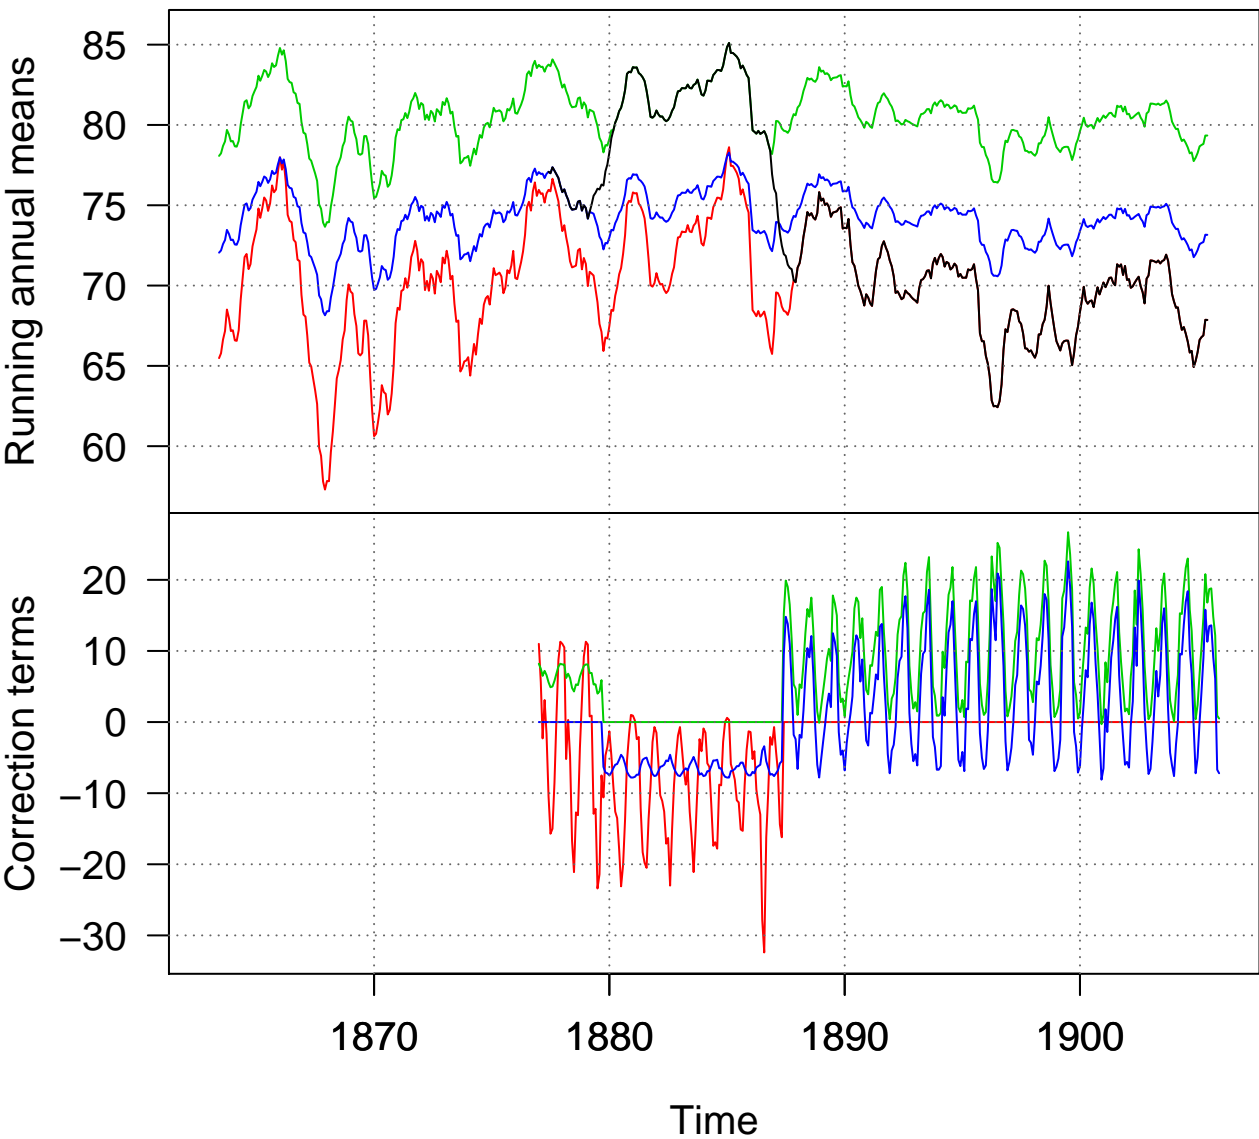

# RH 3 (Porto) Porto

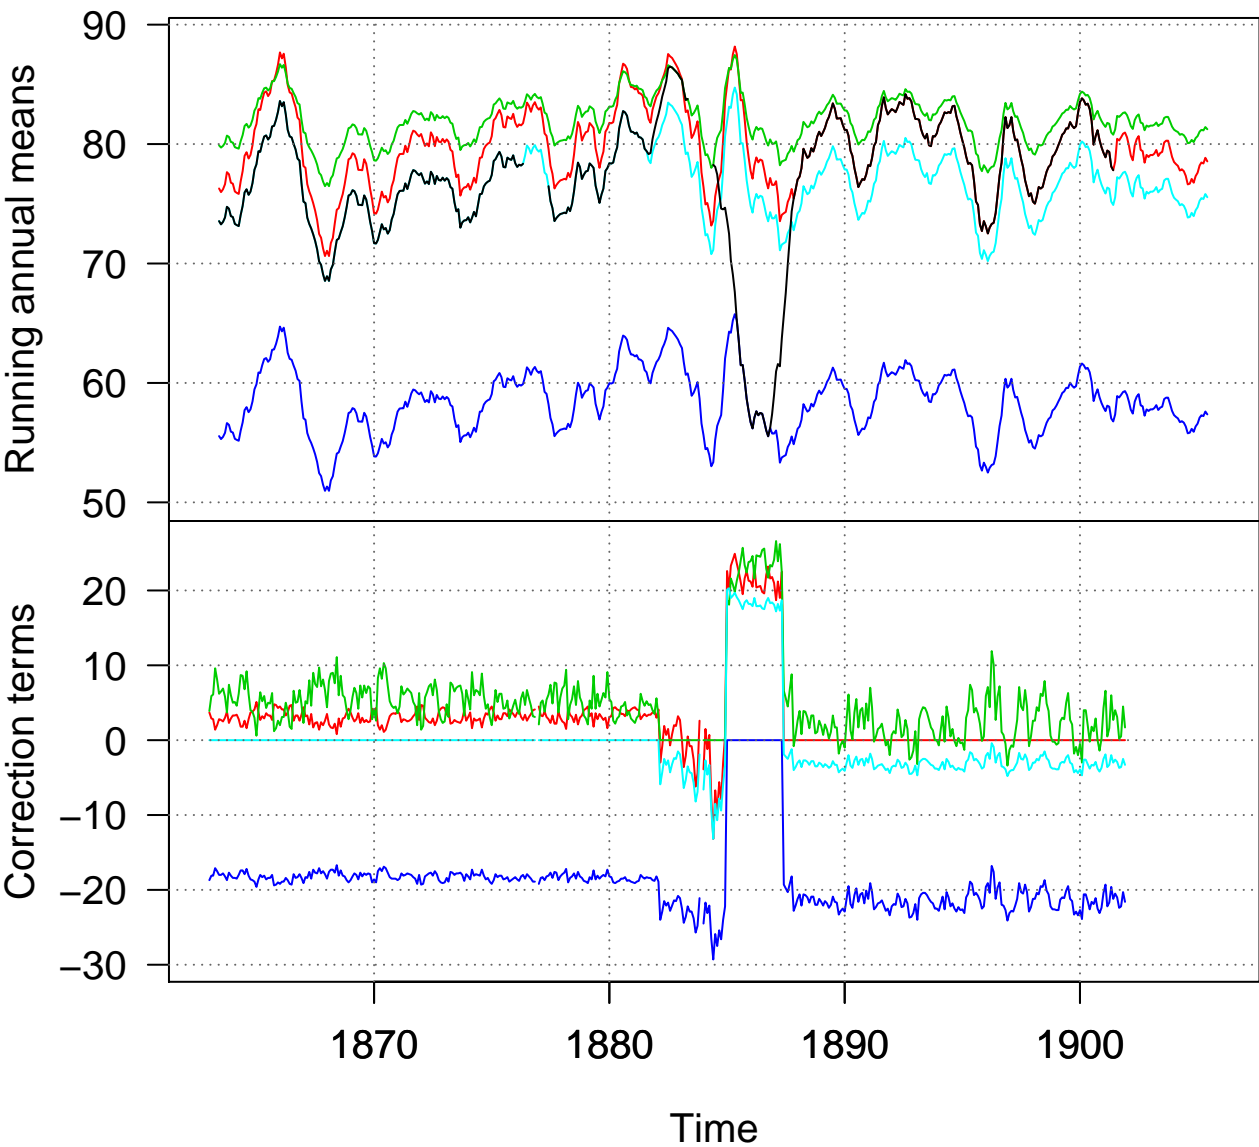

**RH 4 (Vizeu)**

**Vizeu**

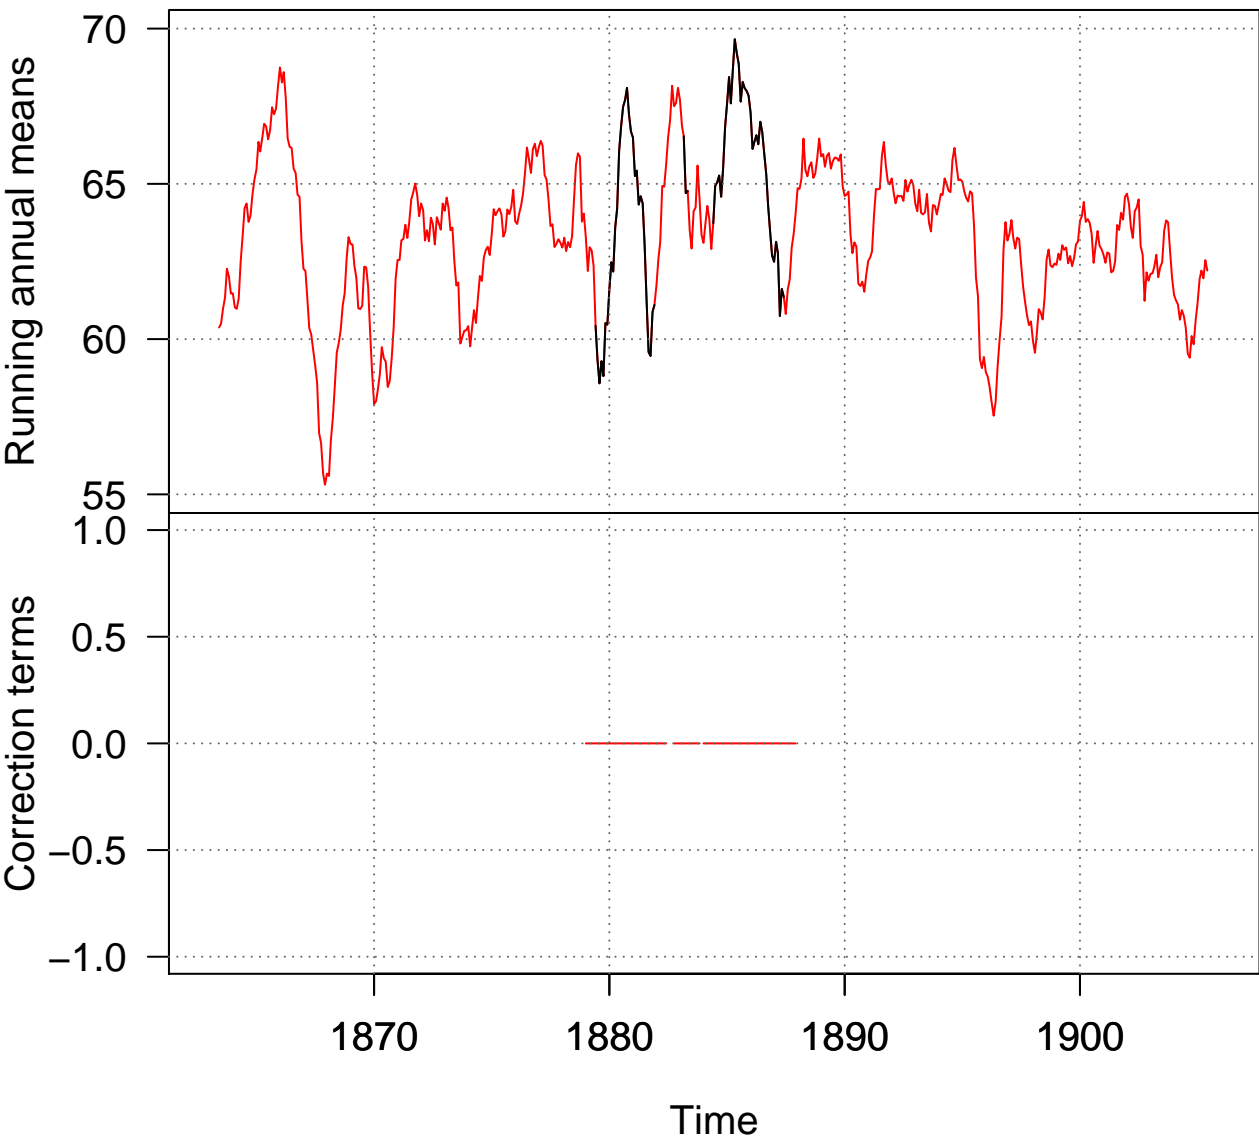

# RH 5 (Guarda) Guarda

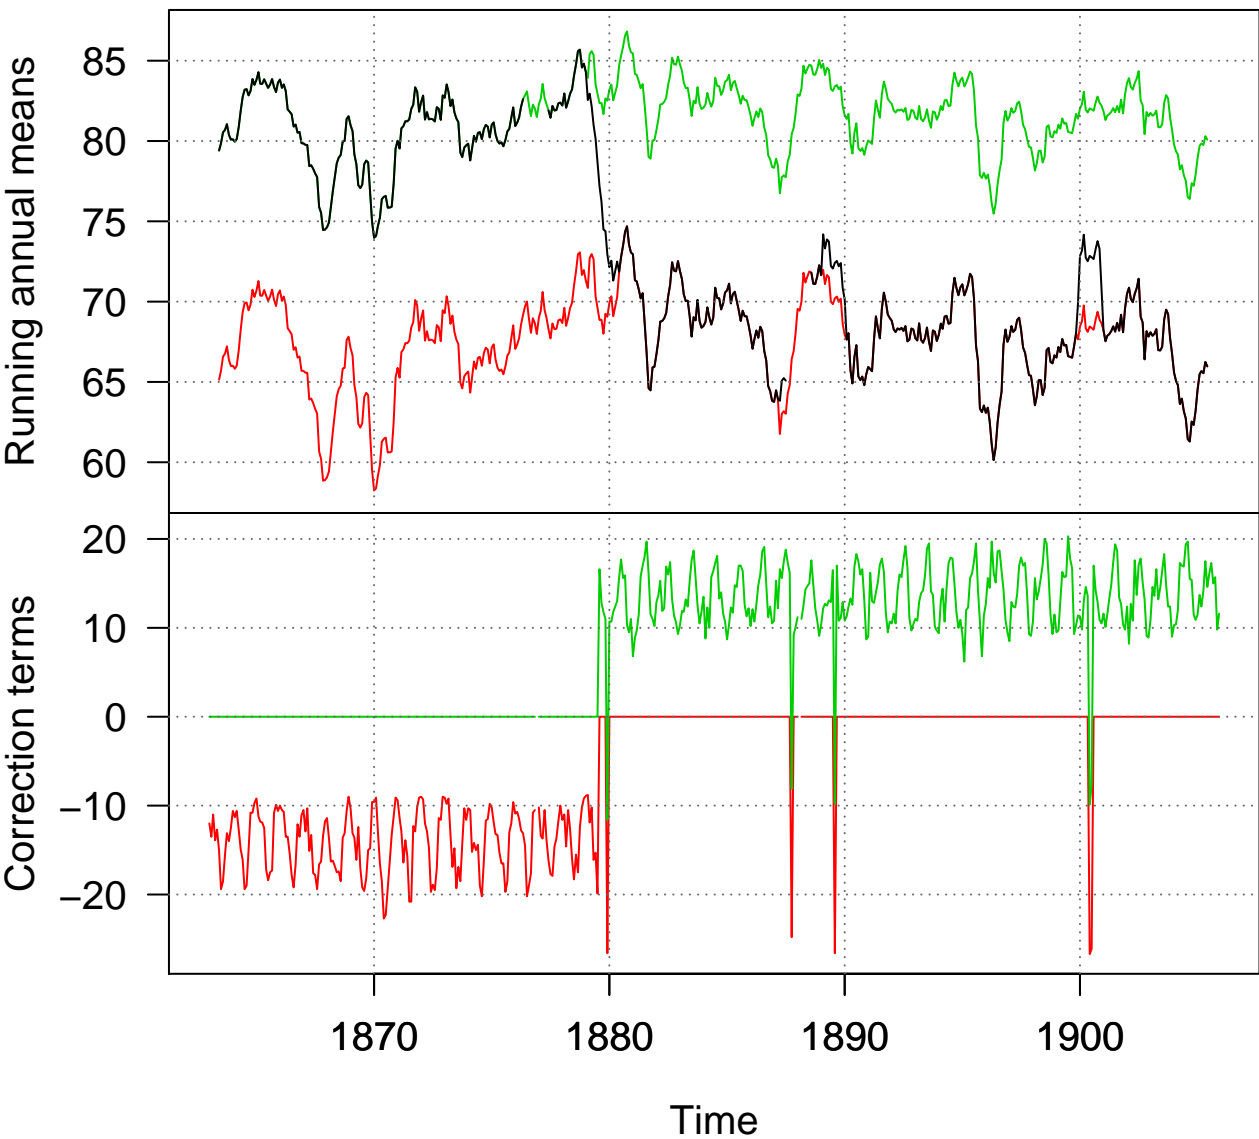

# RH 6 (Serra\_da\_Estrella)

## Serra da Estrella

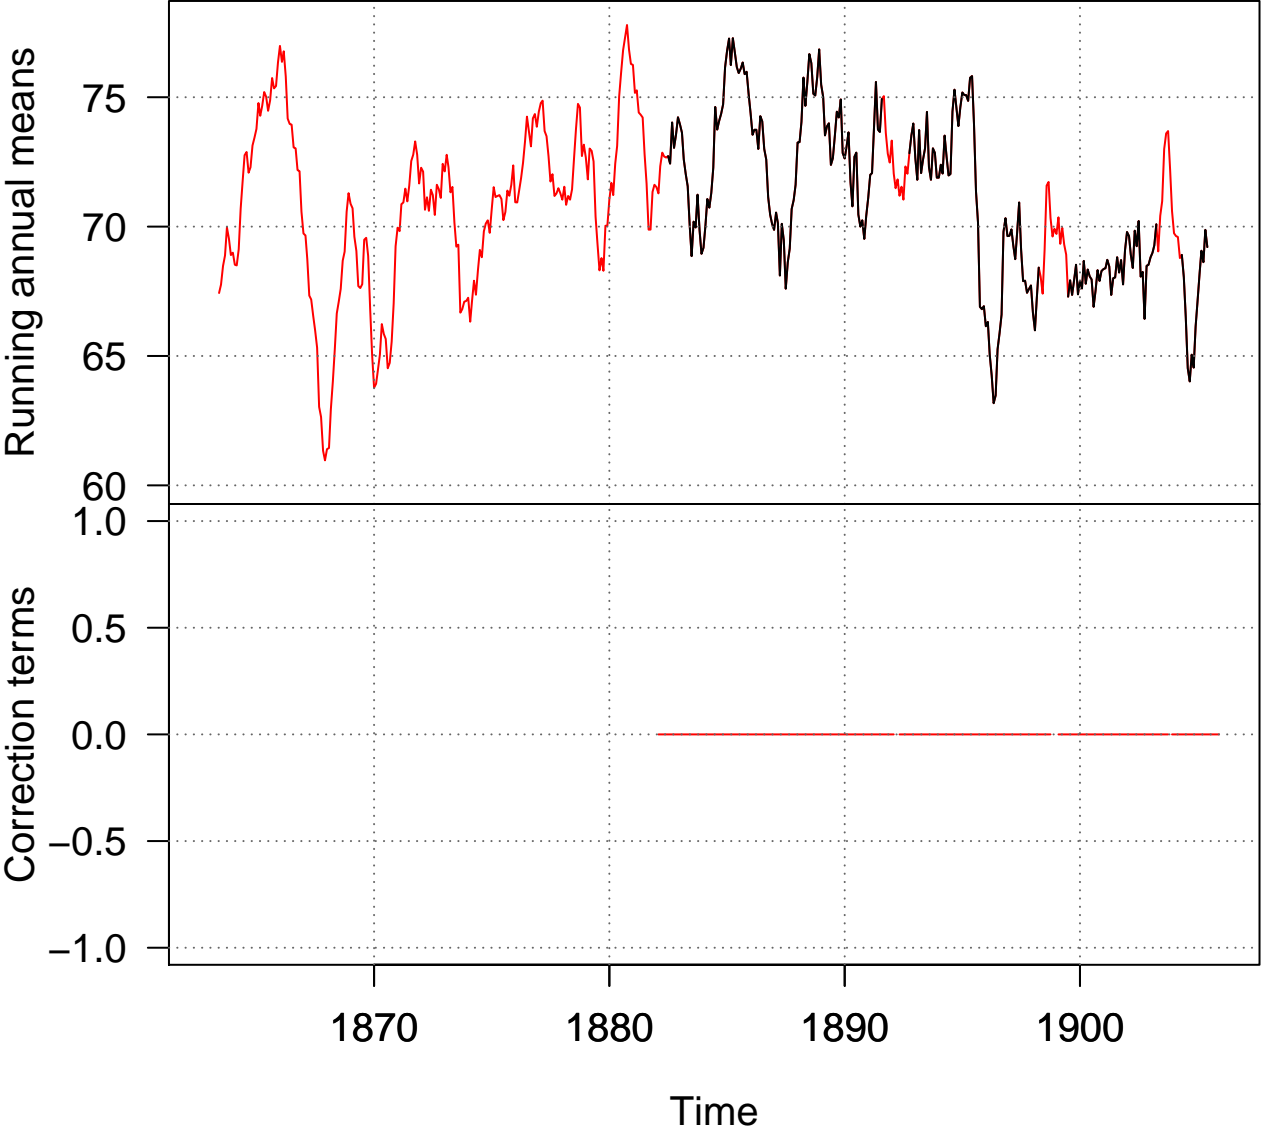

**RH 7 (S.\_Fiel)**

**S. Fiel**

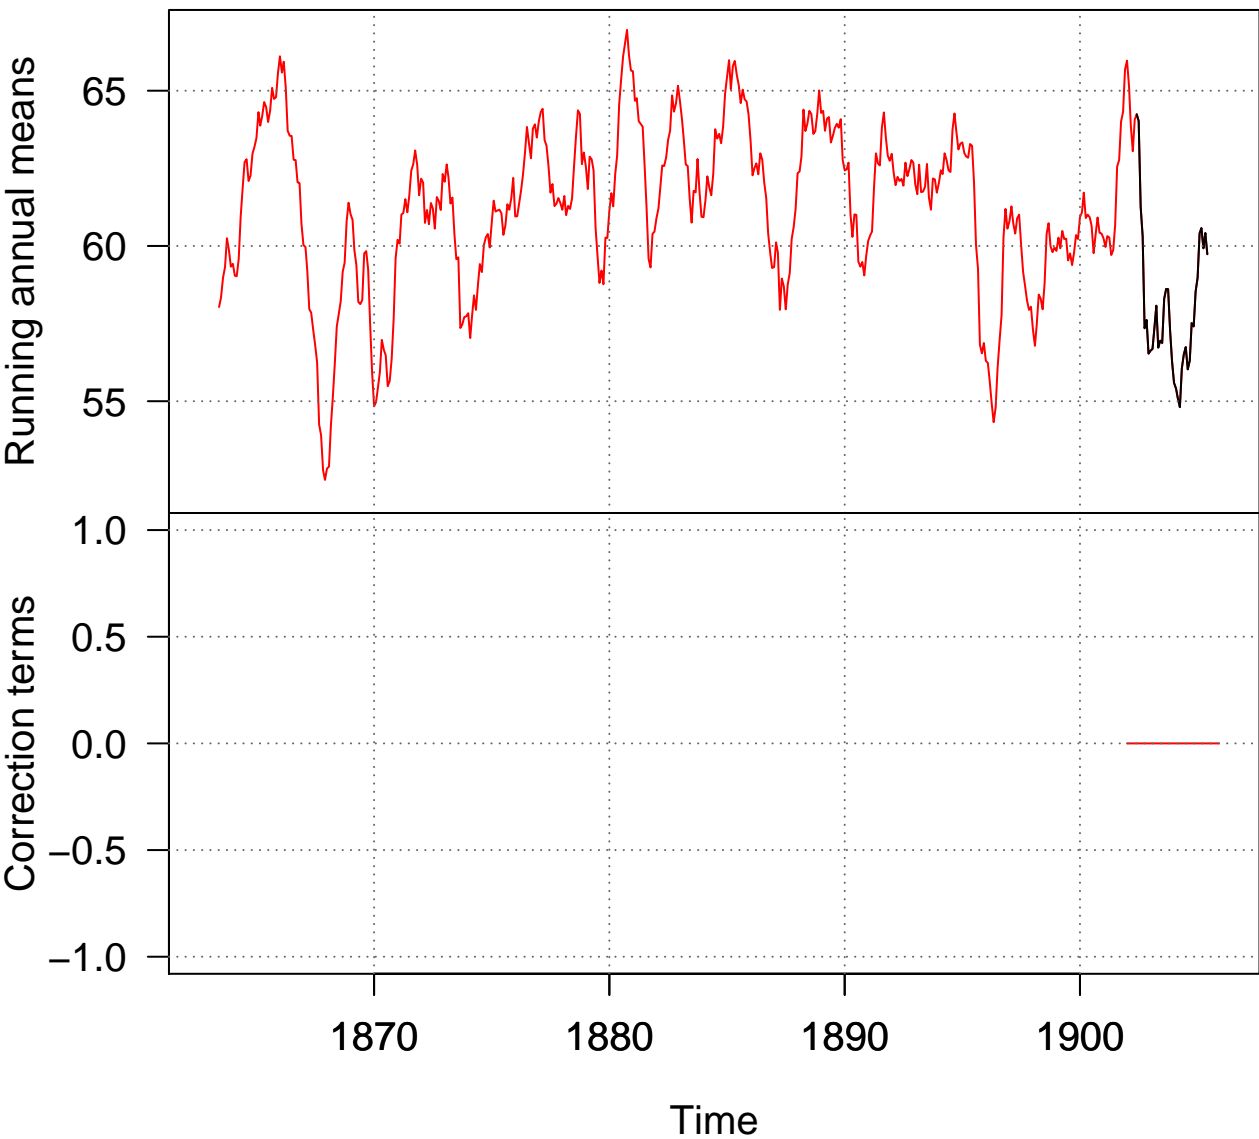

# RH 8 (Alcanhoes) Alcanhoes

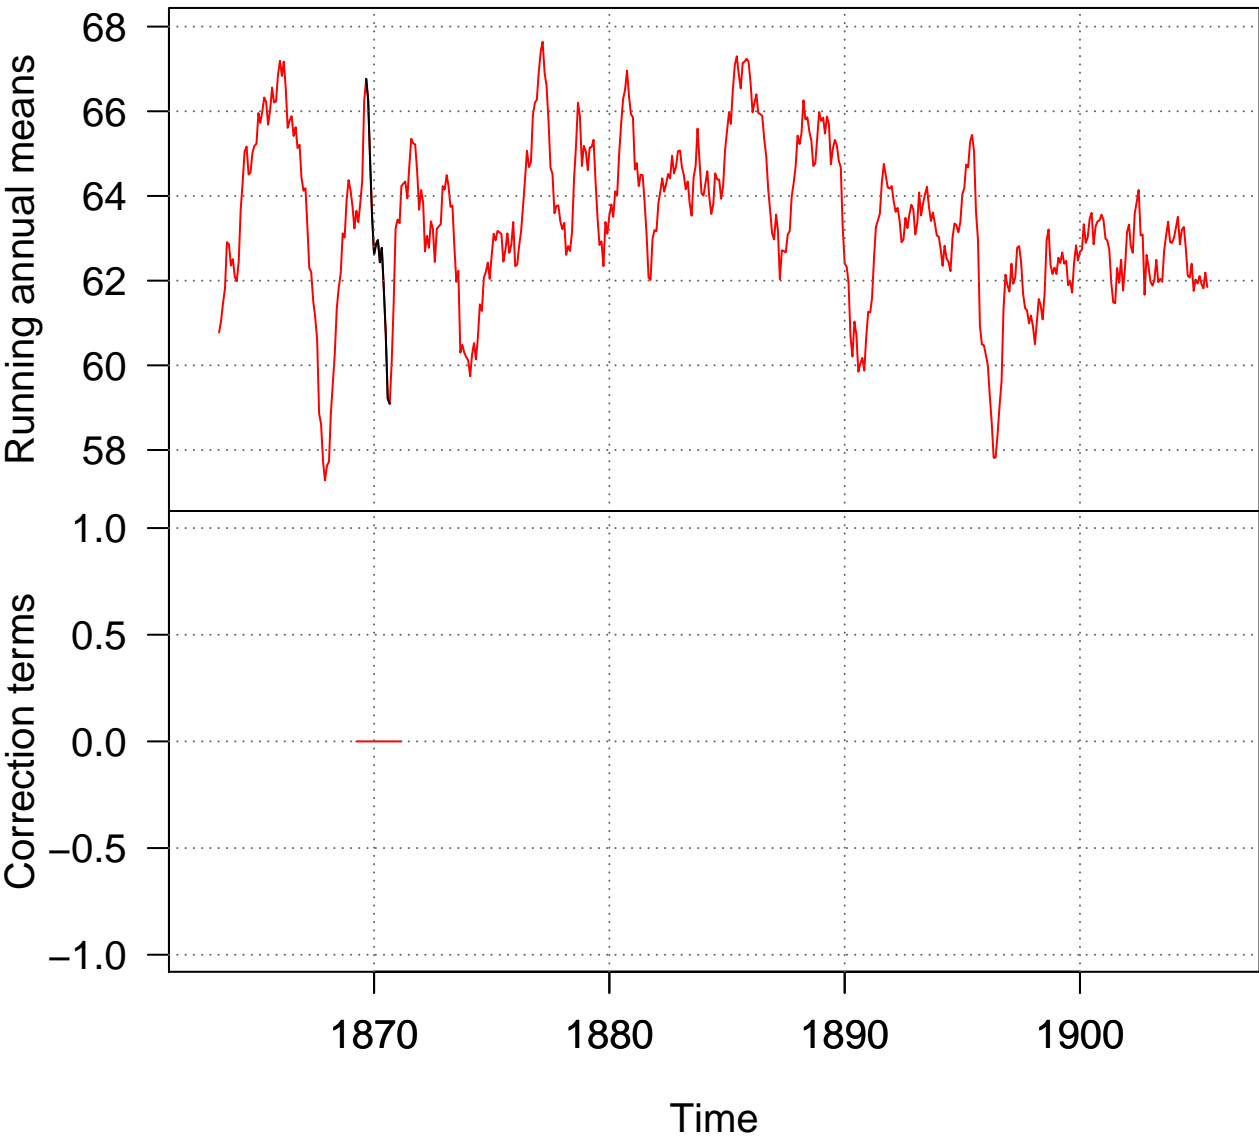

# RH 9 (Campo\_Maior) Campo Maior

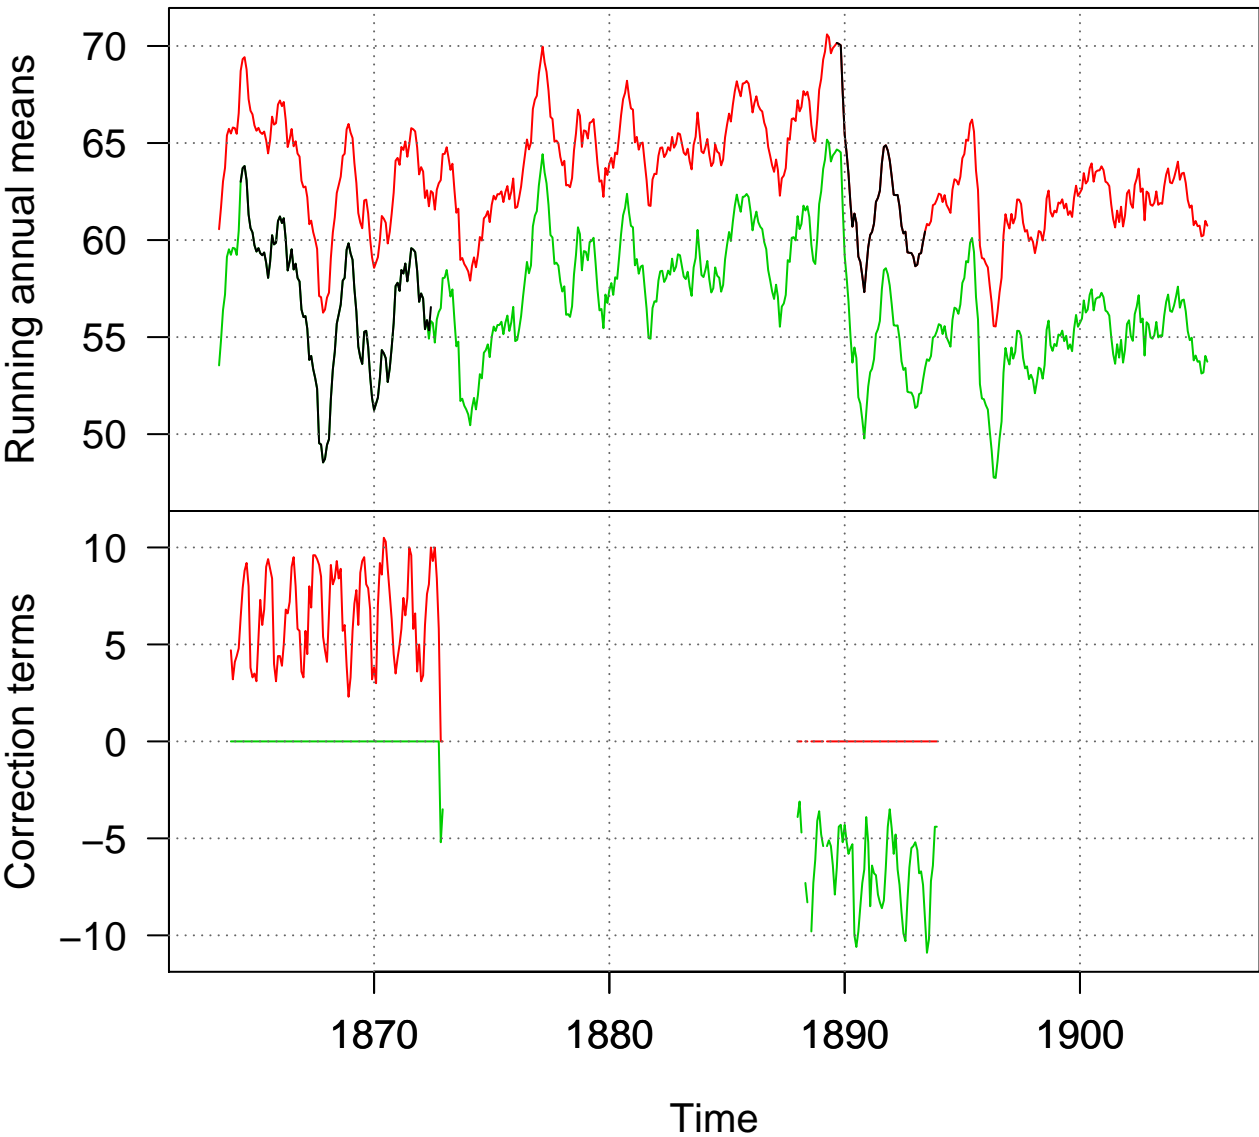



# RH 10 (Infante\_D\_Luiz)

## Lisbon Infante D. Luiz

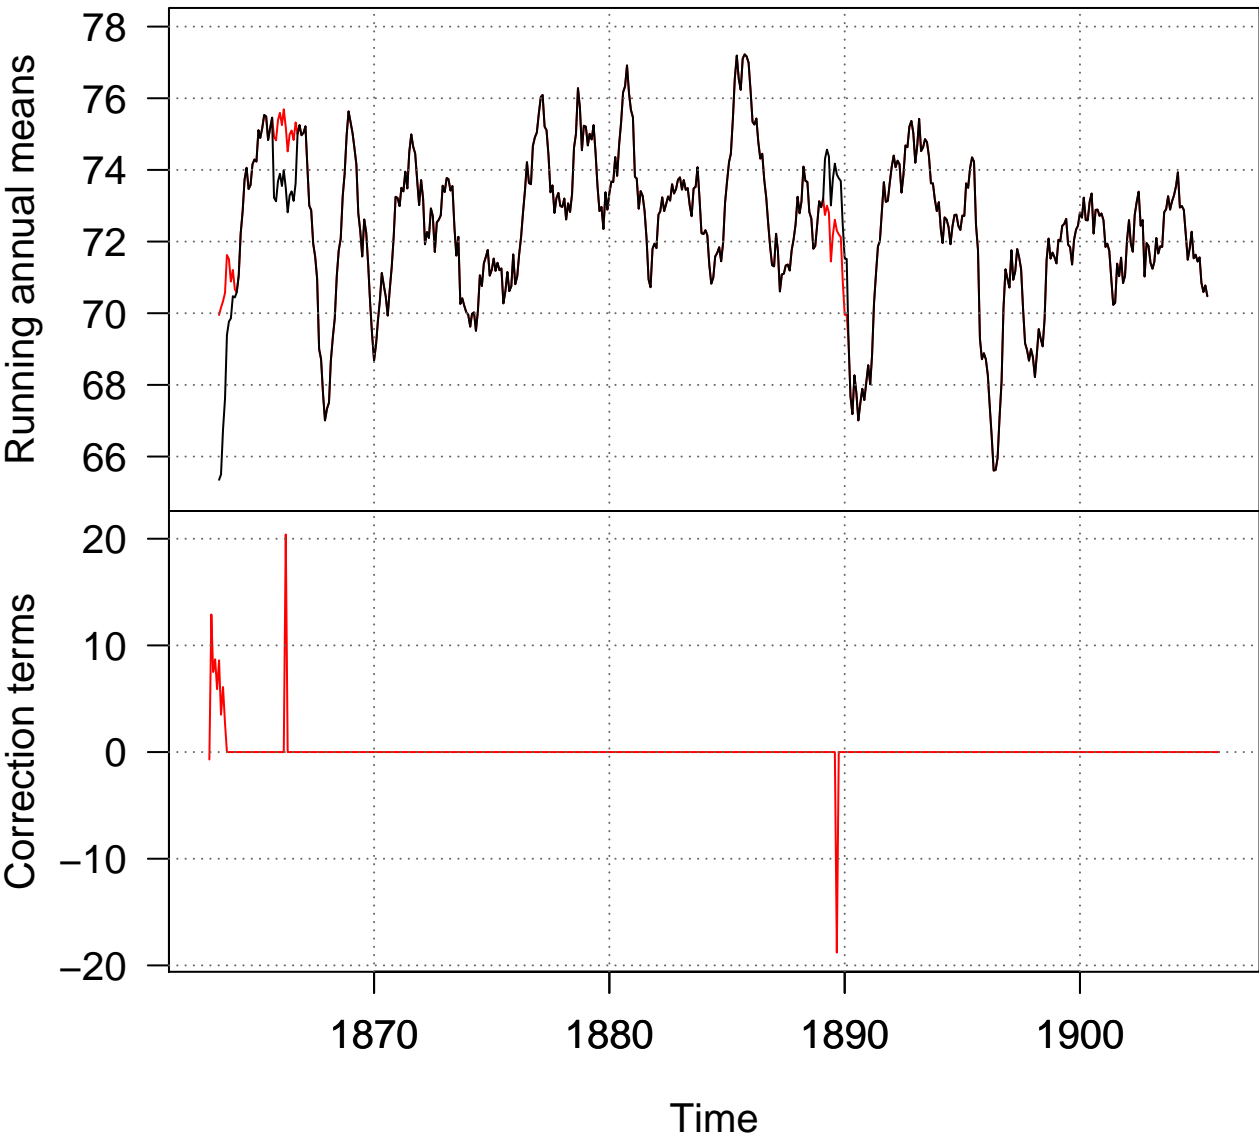

# RH 11 (Angra\_do\_Heroismo)

## Angra do Heroismo

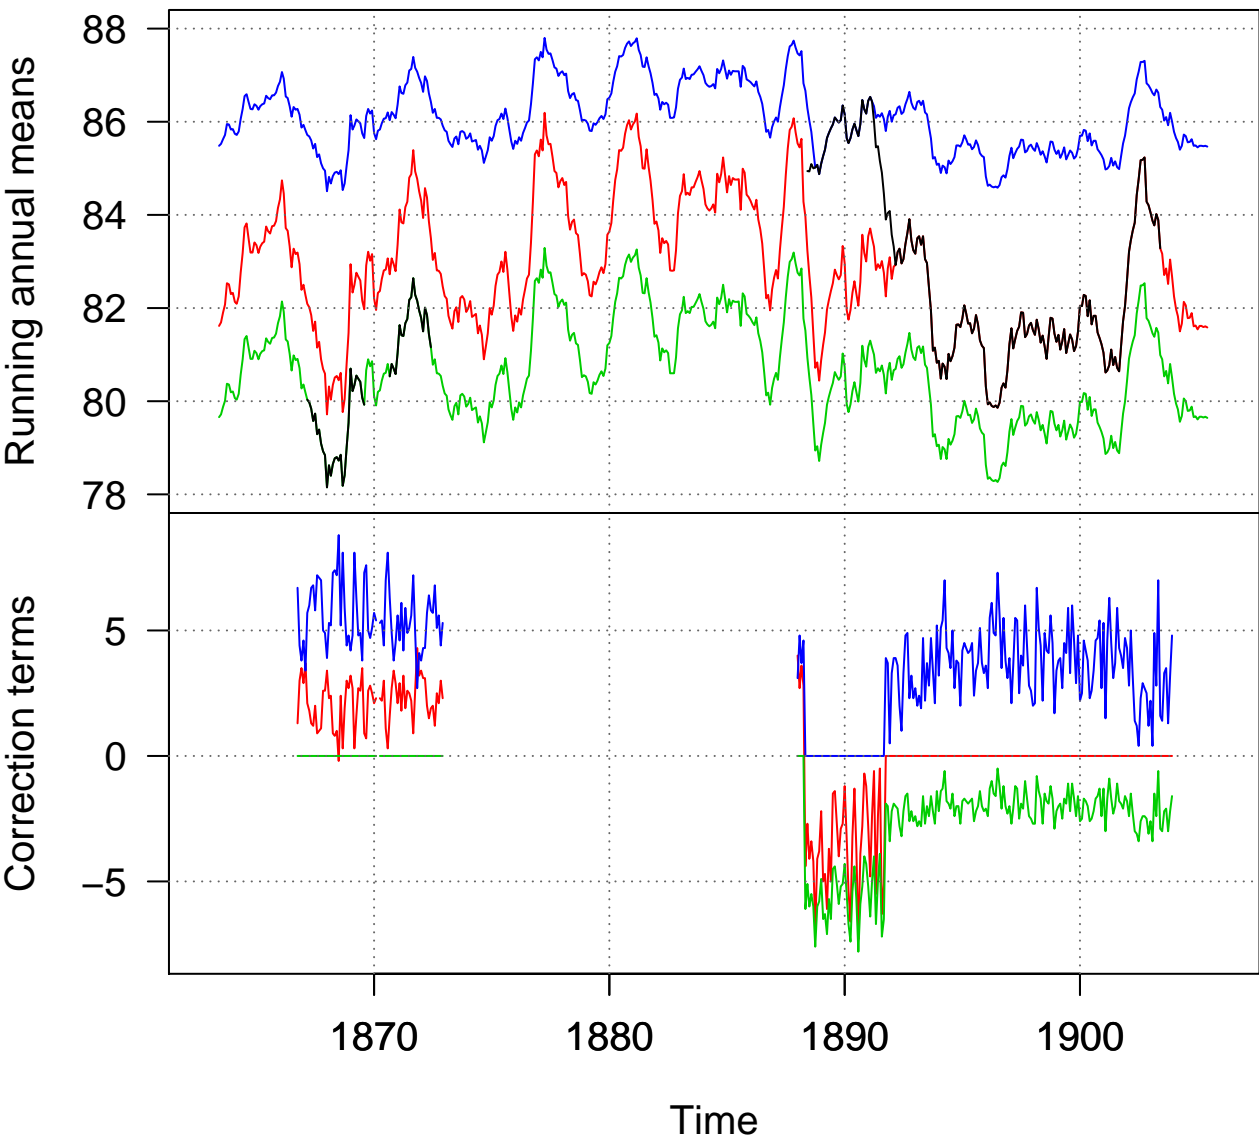

# RH 12 (Evora) Evora

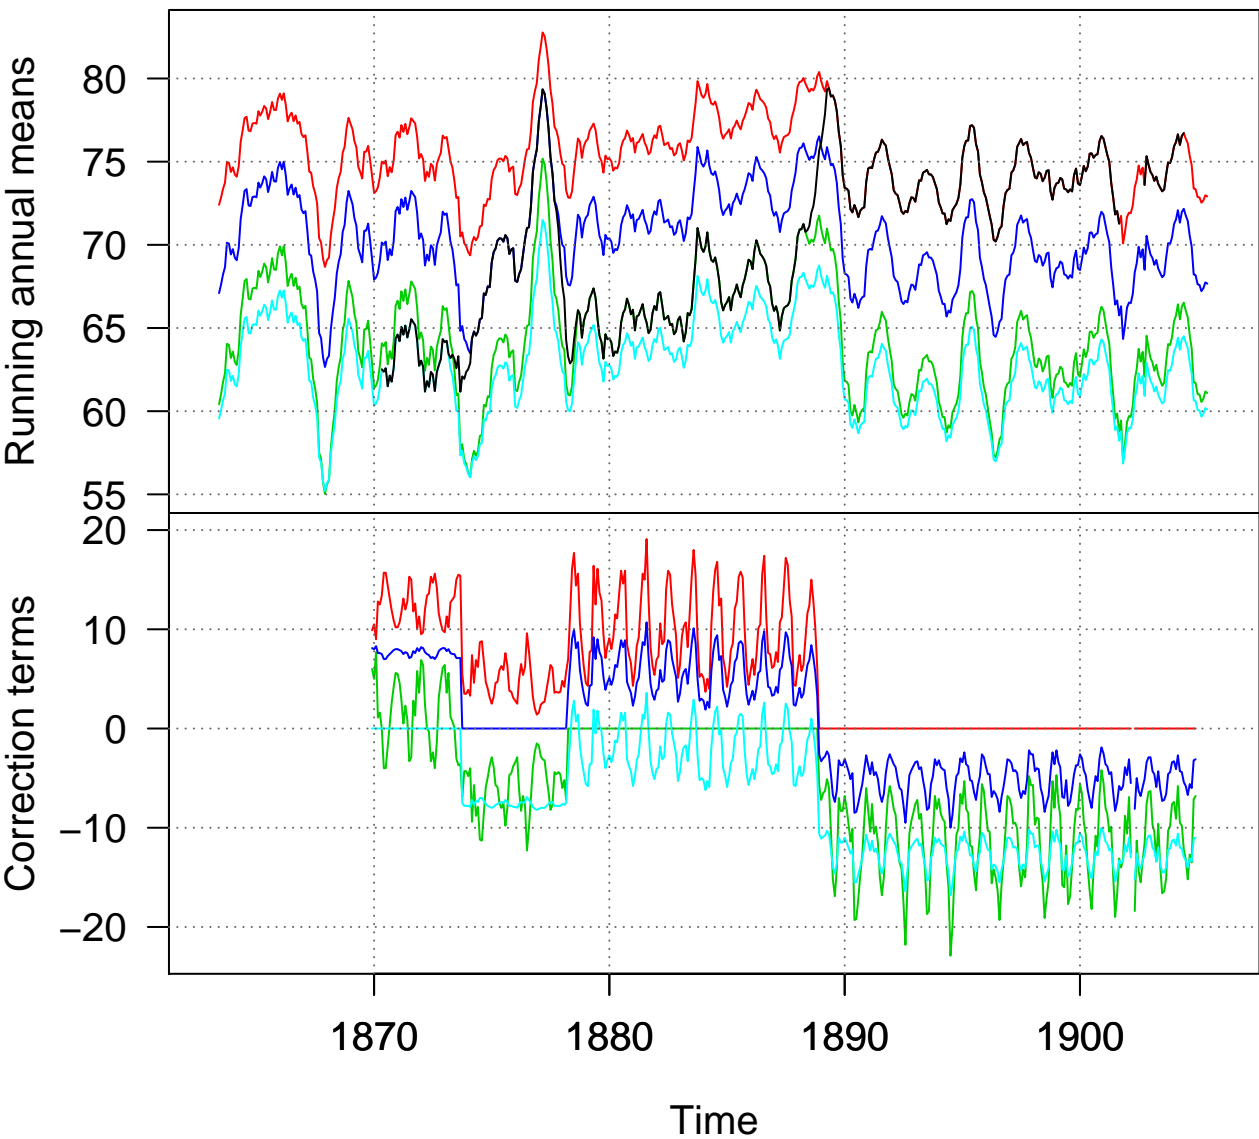

# RH 13 (Villa\_Fernando)

## Villa Fernando

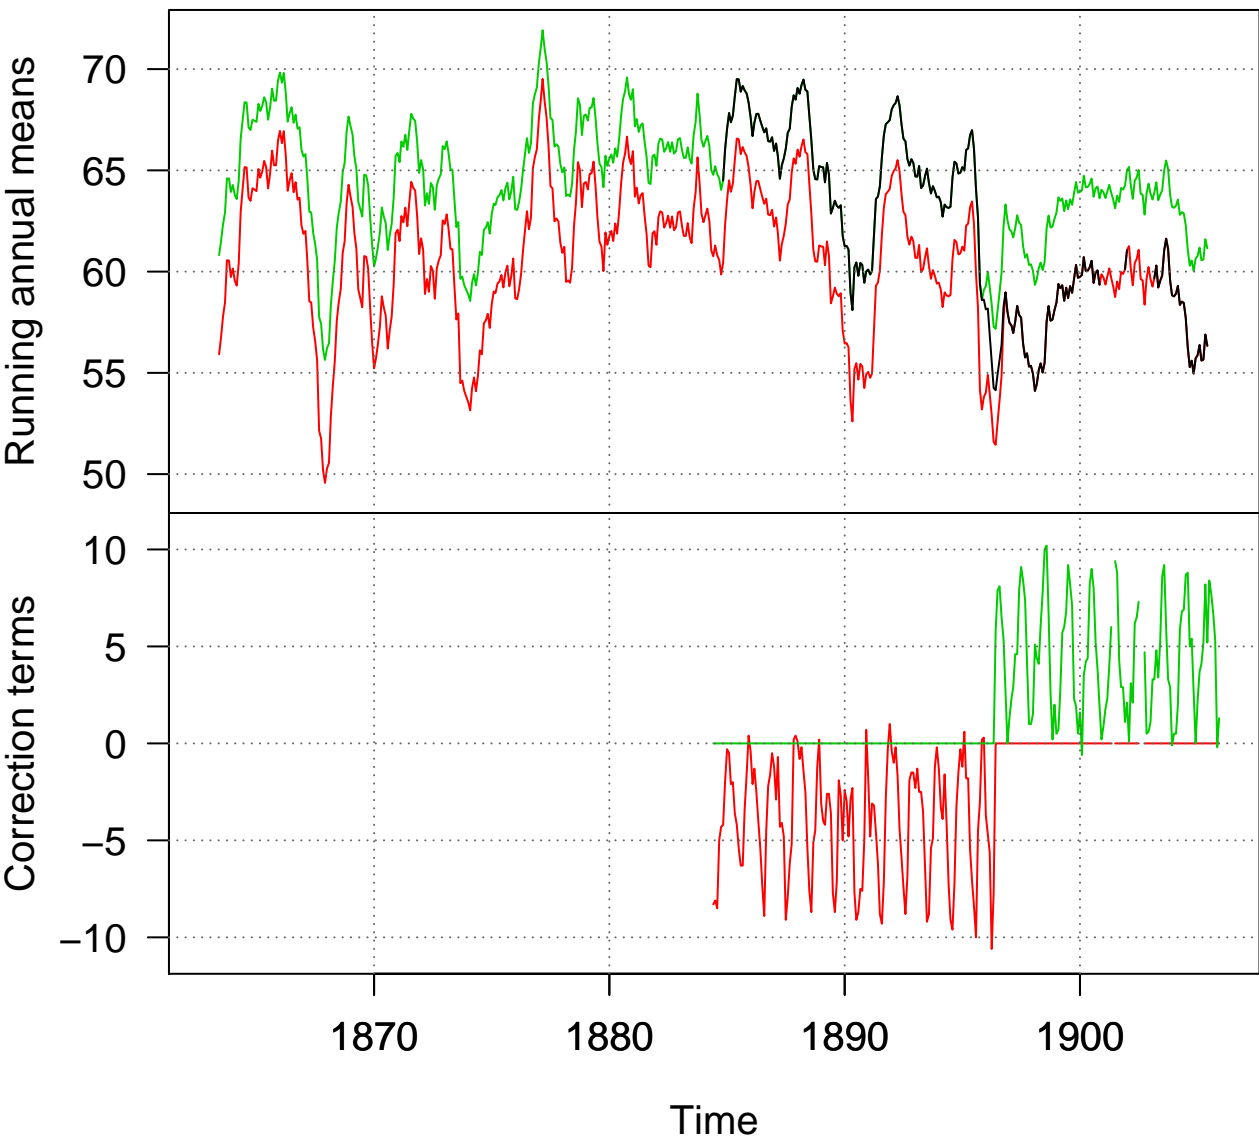

# RH 14 (Beja) Beja

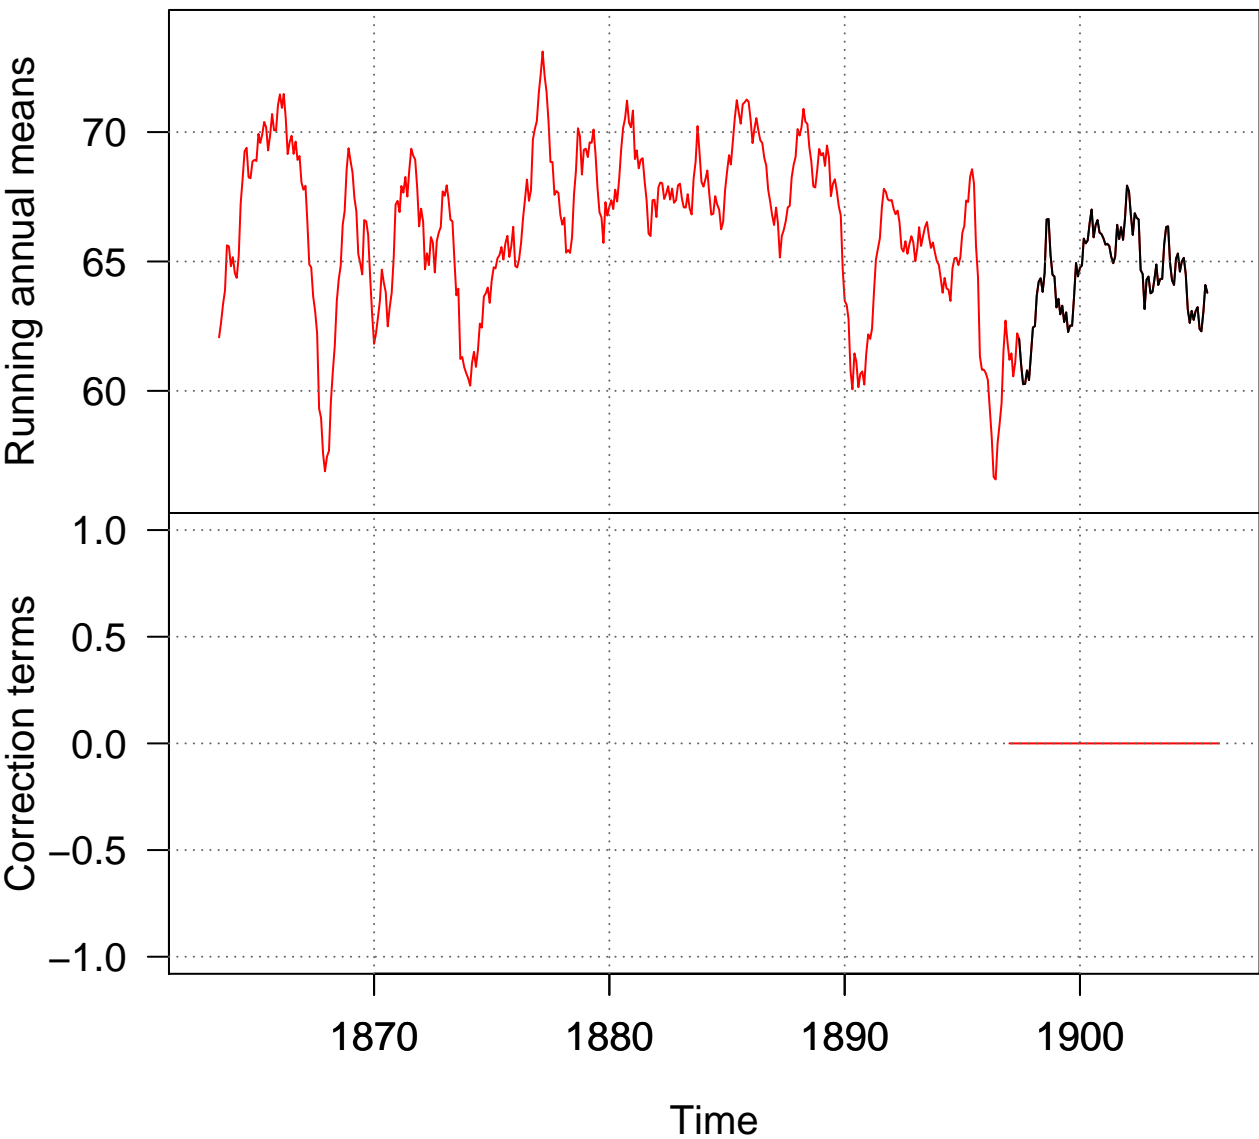

# RH 15 (Ponta\_Delgada)

## Ponta Delgada

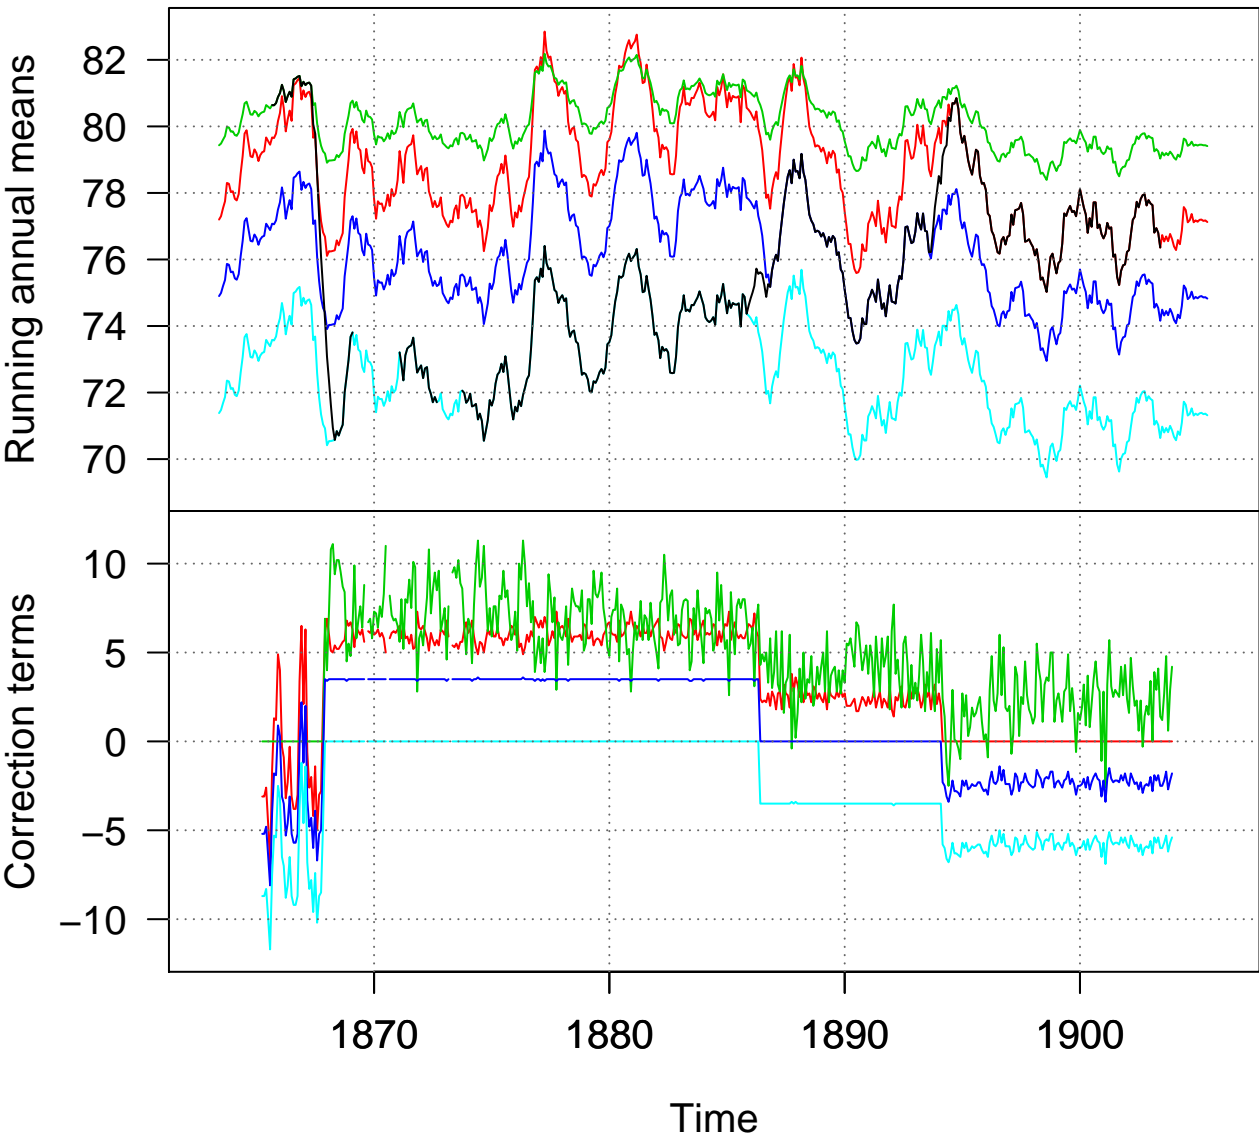

# RH 16 (Lagos) Lagos

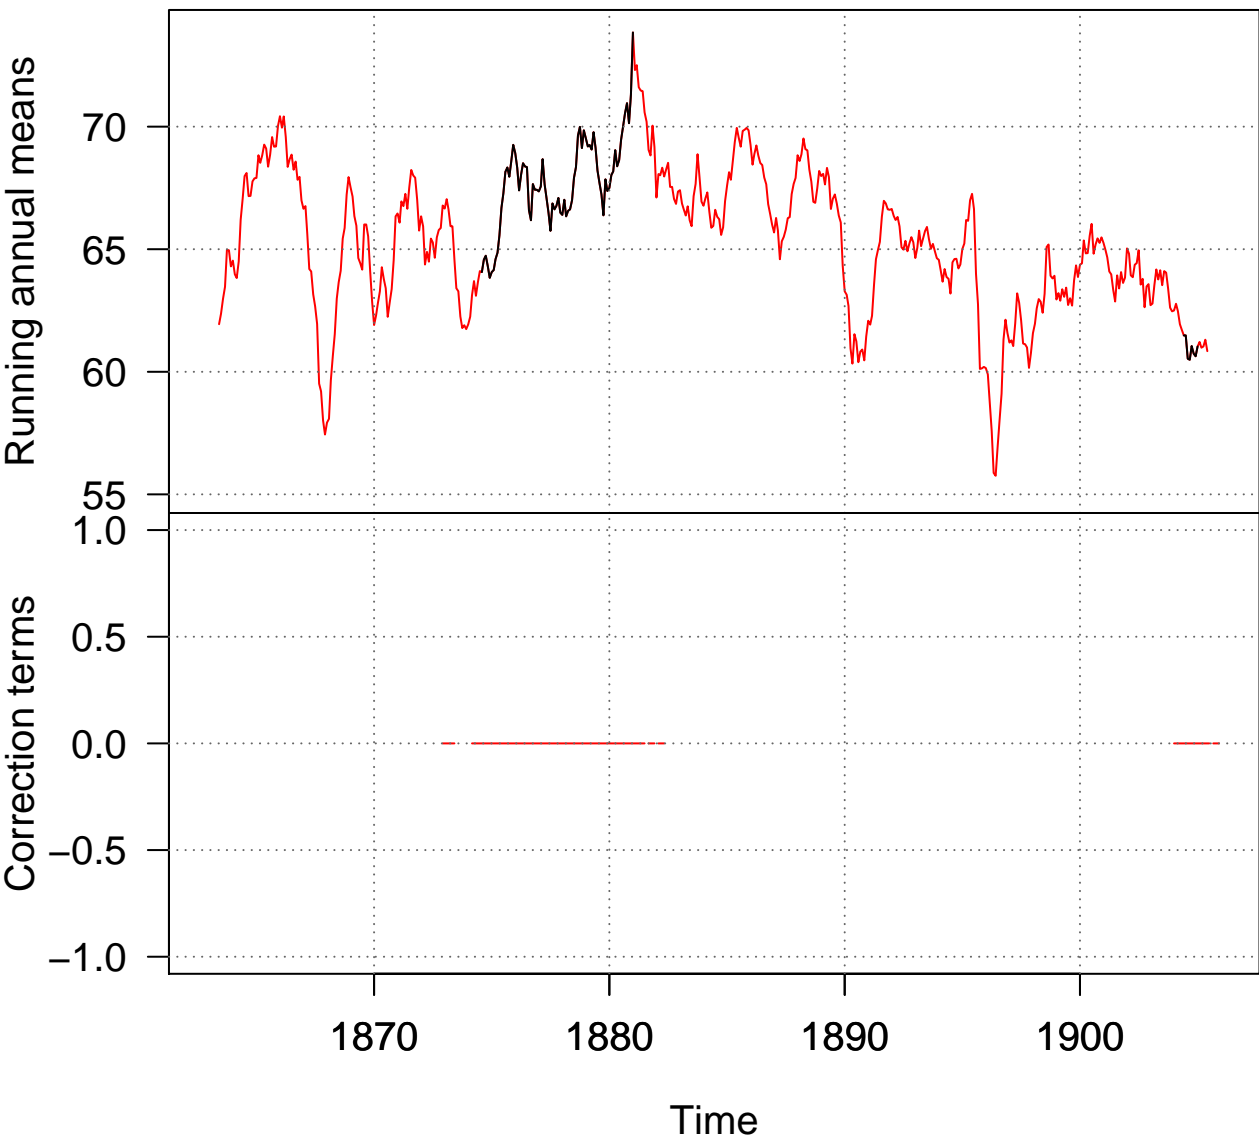

# RH 17 (Faro) Faro

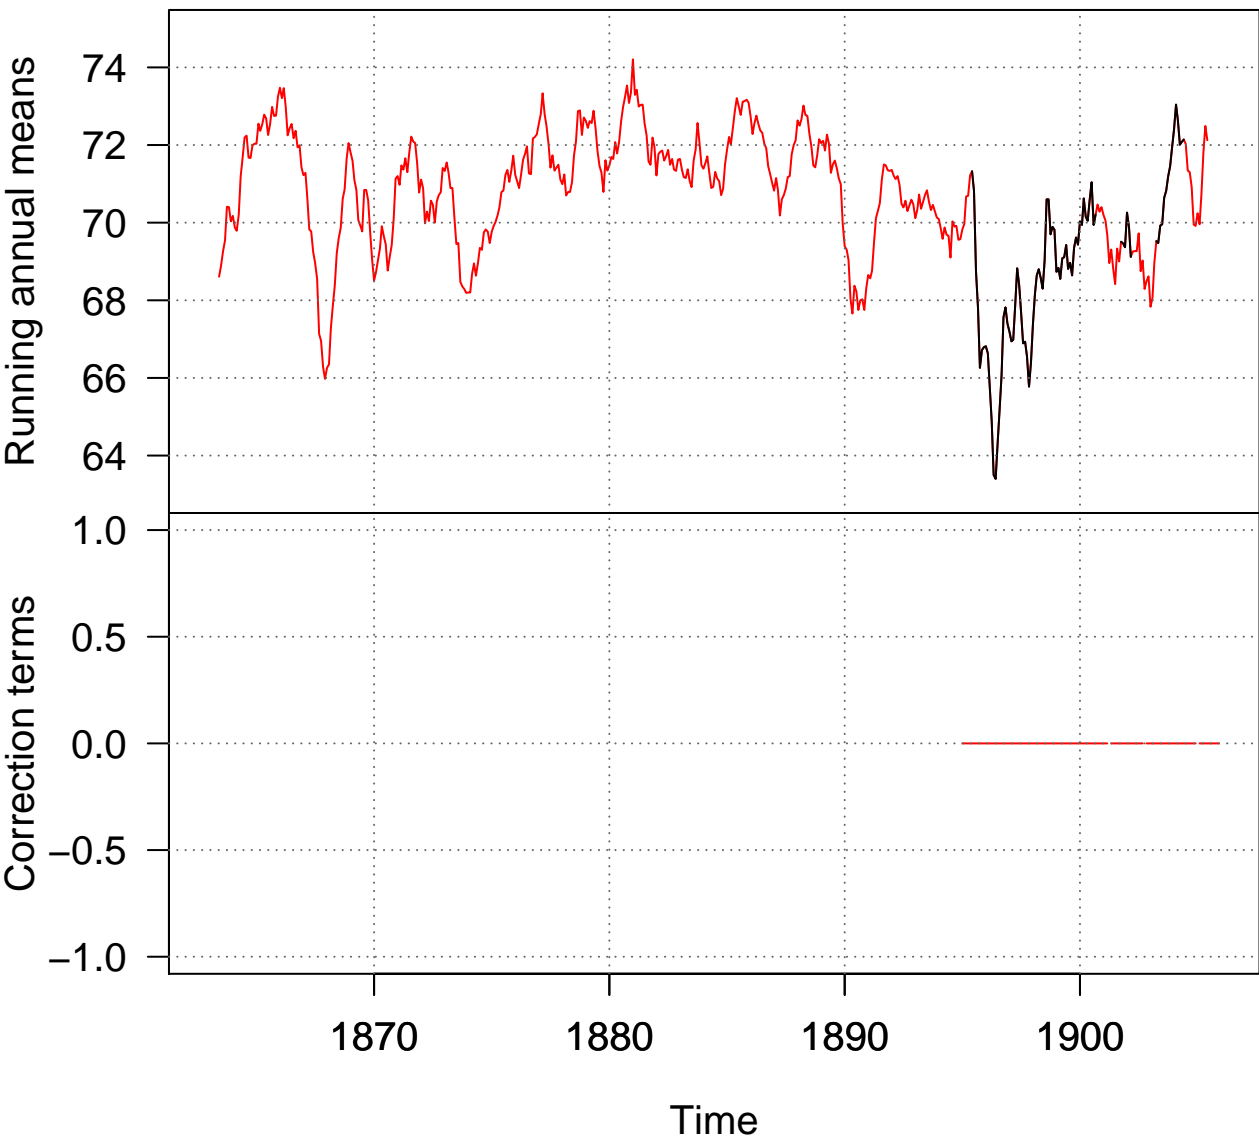



# RH 18 (Funchal) Funchal

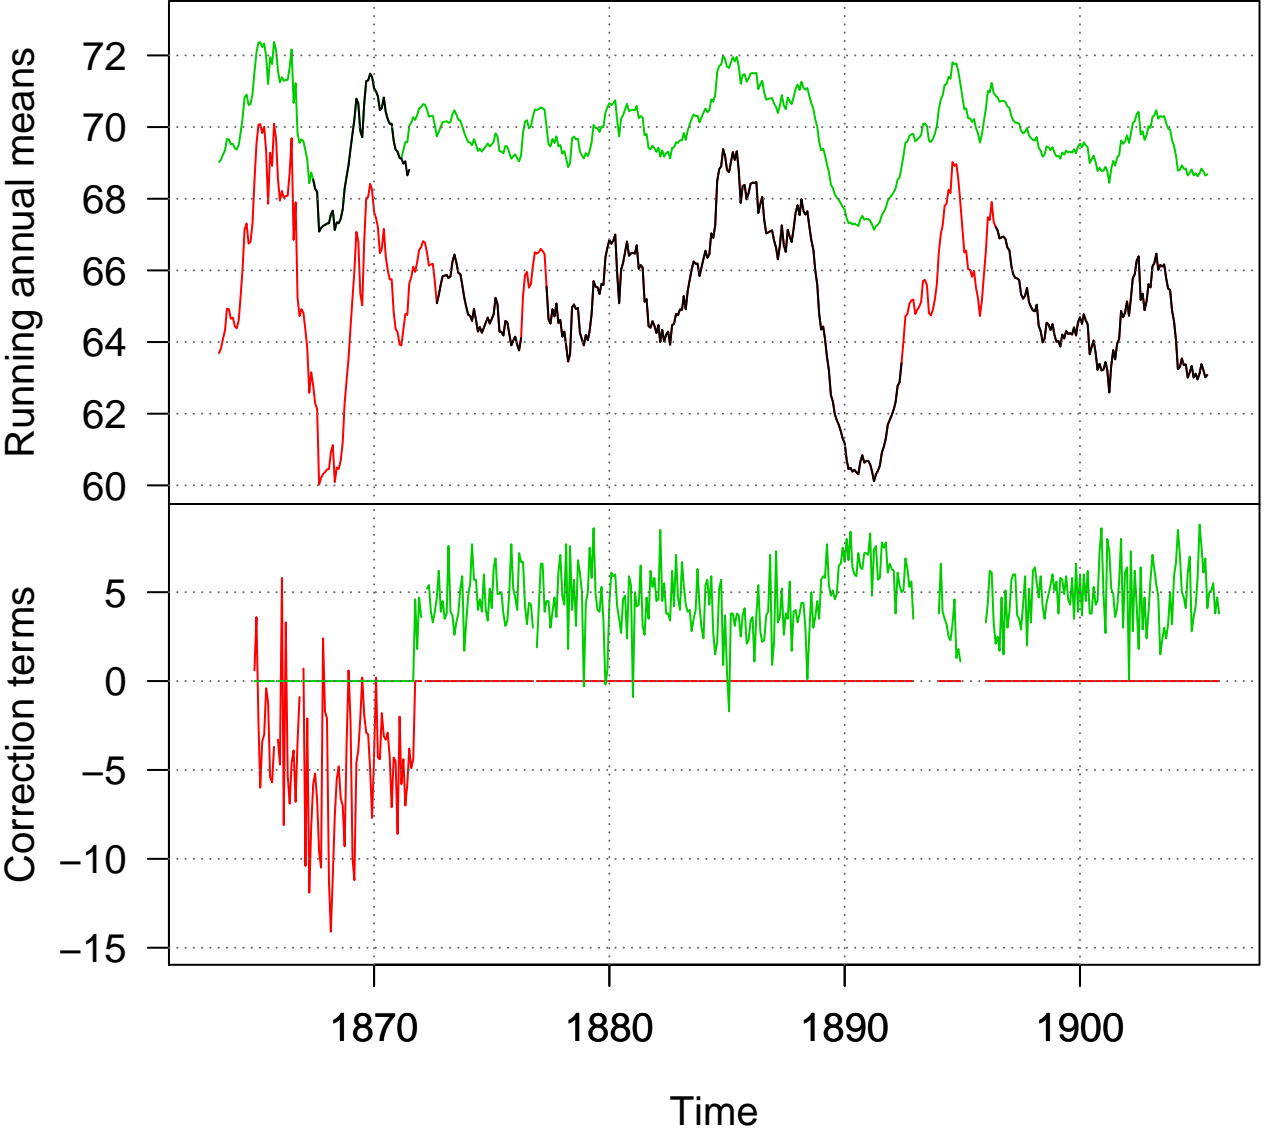

**RH 19 (S.\_Vicente)**  
**S. Vicente**

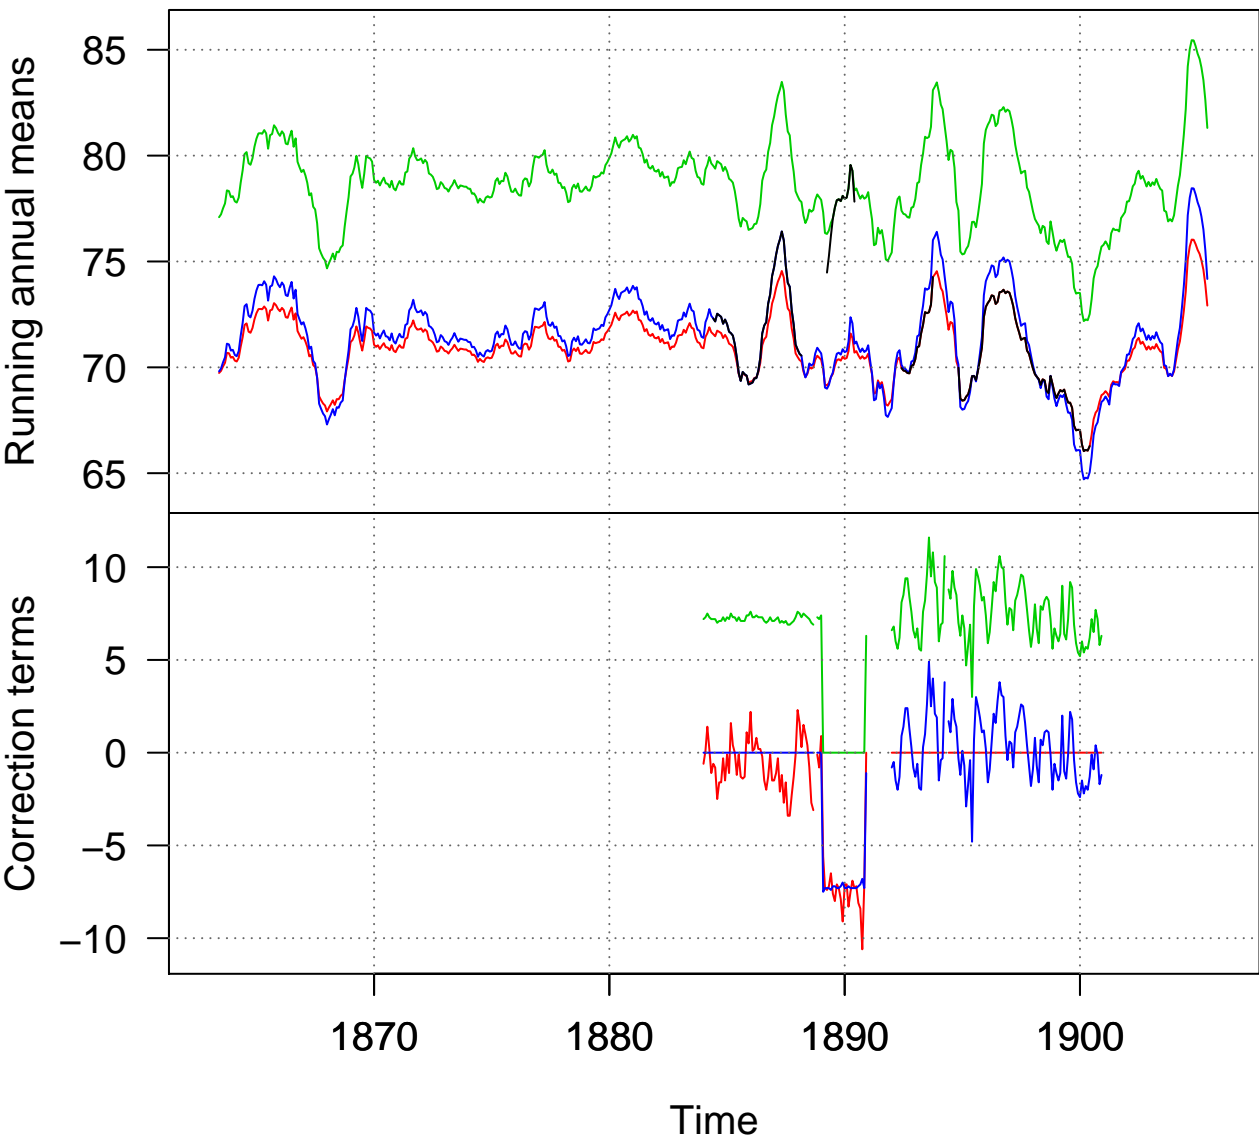

**RH 20 (Cidade\_da\_Praia)**  
**Cidade da Praia**

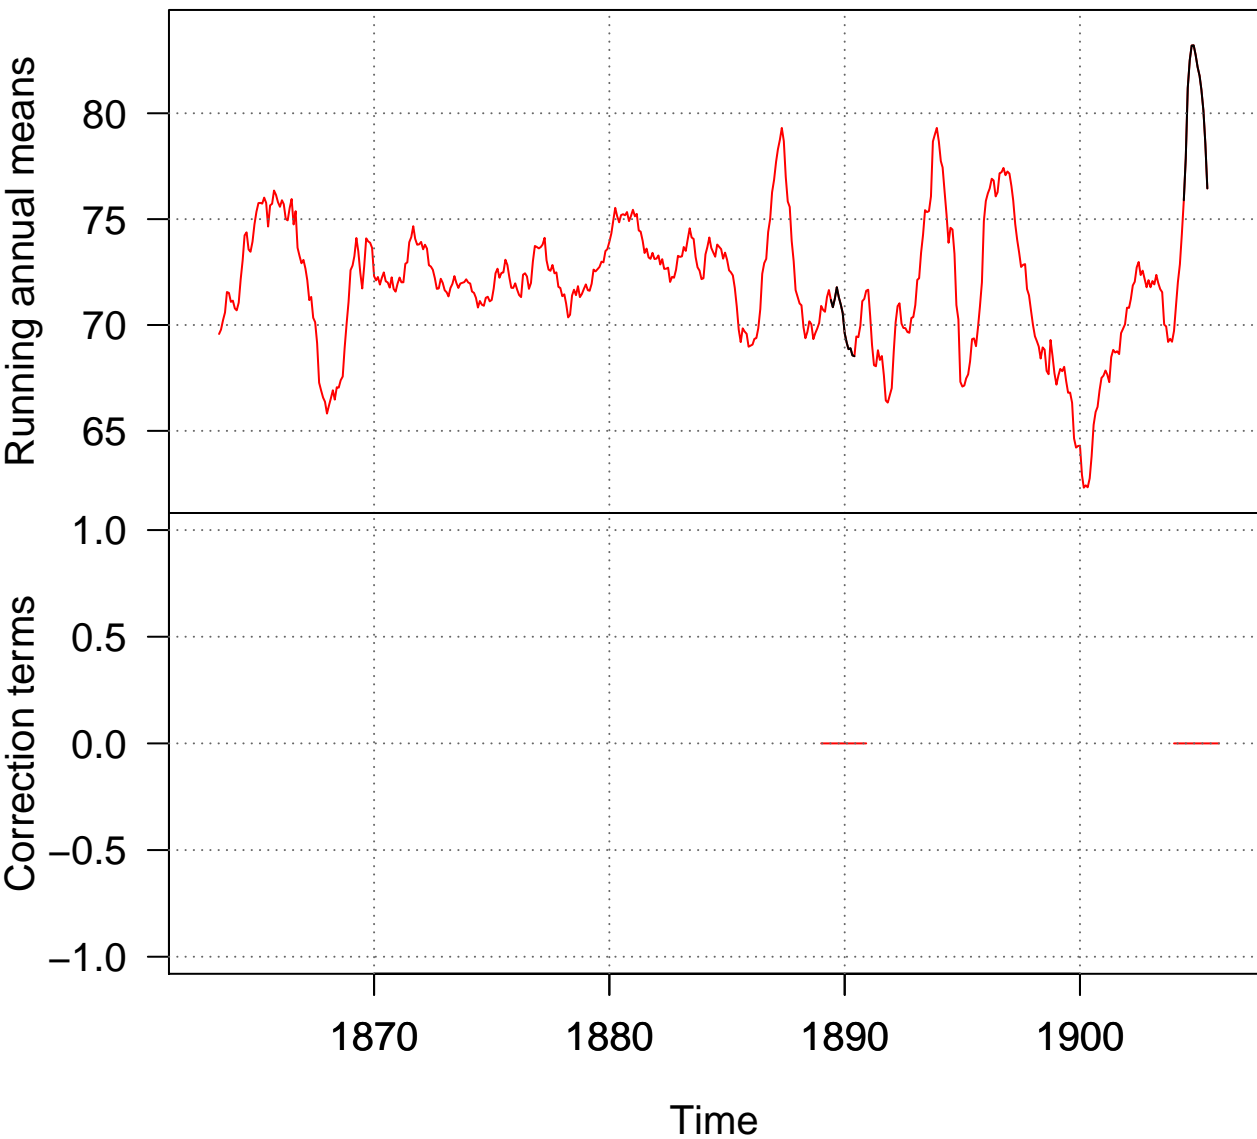

**RH 21 (S.\_Thome)**  
**S. Thome**

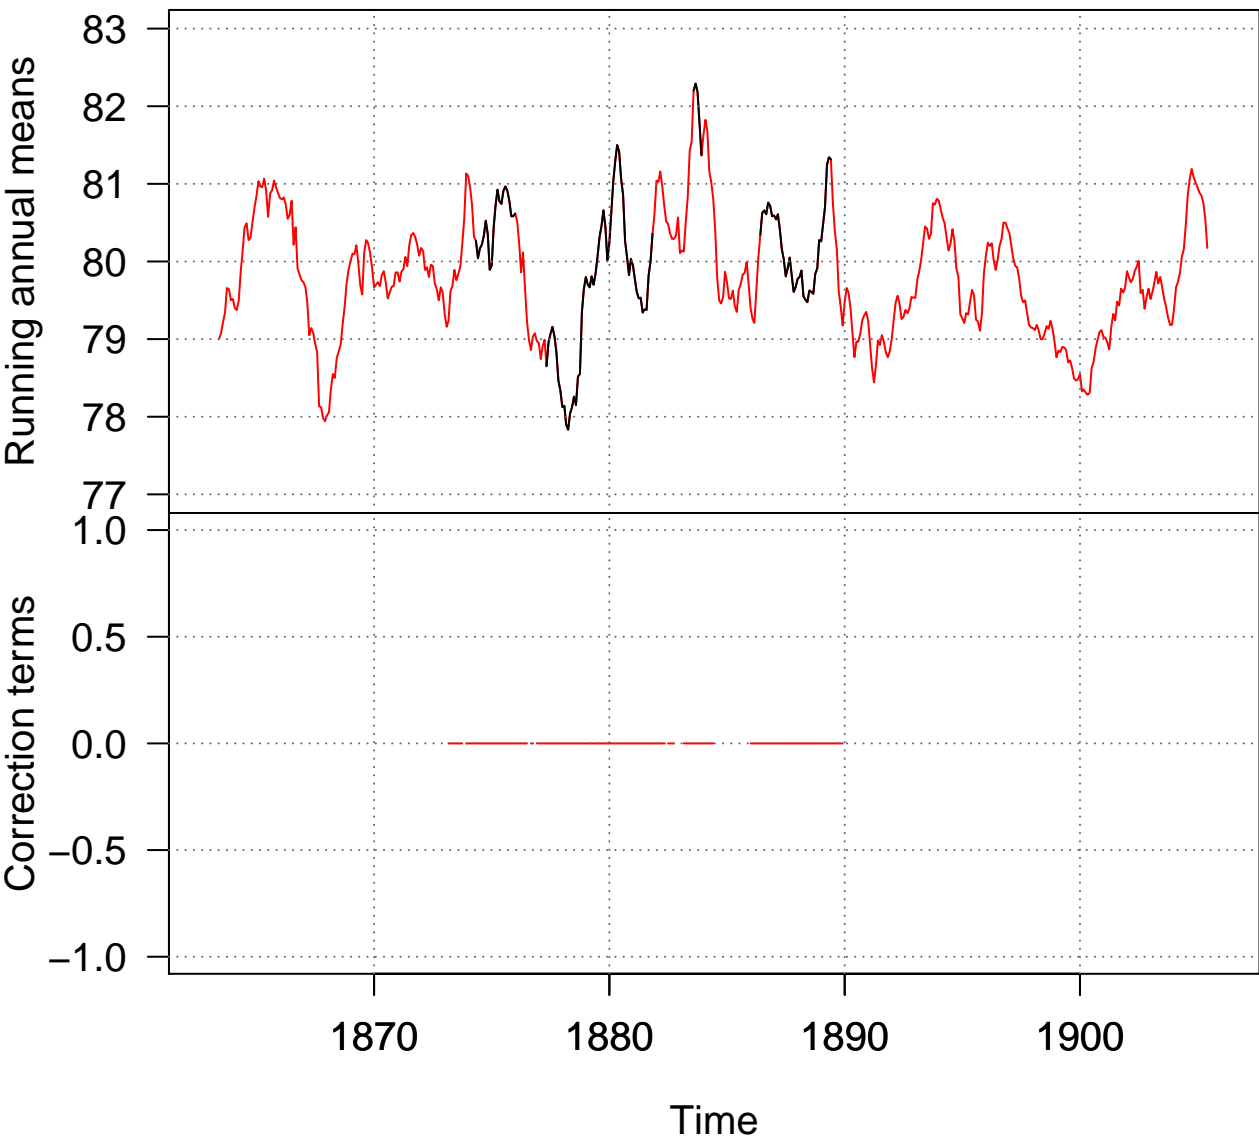

**RH 22 (S. Salvador do Congo)**  
**S. Salvador do Congo**

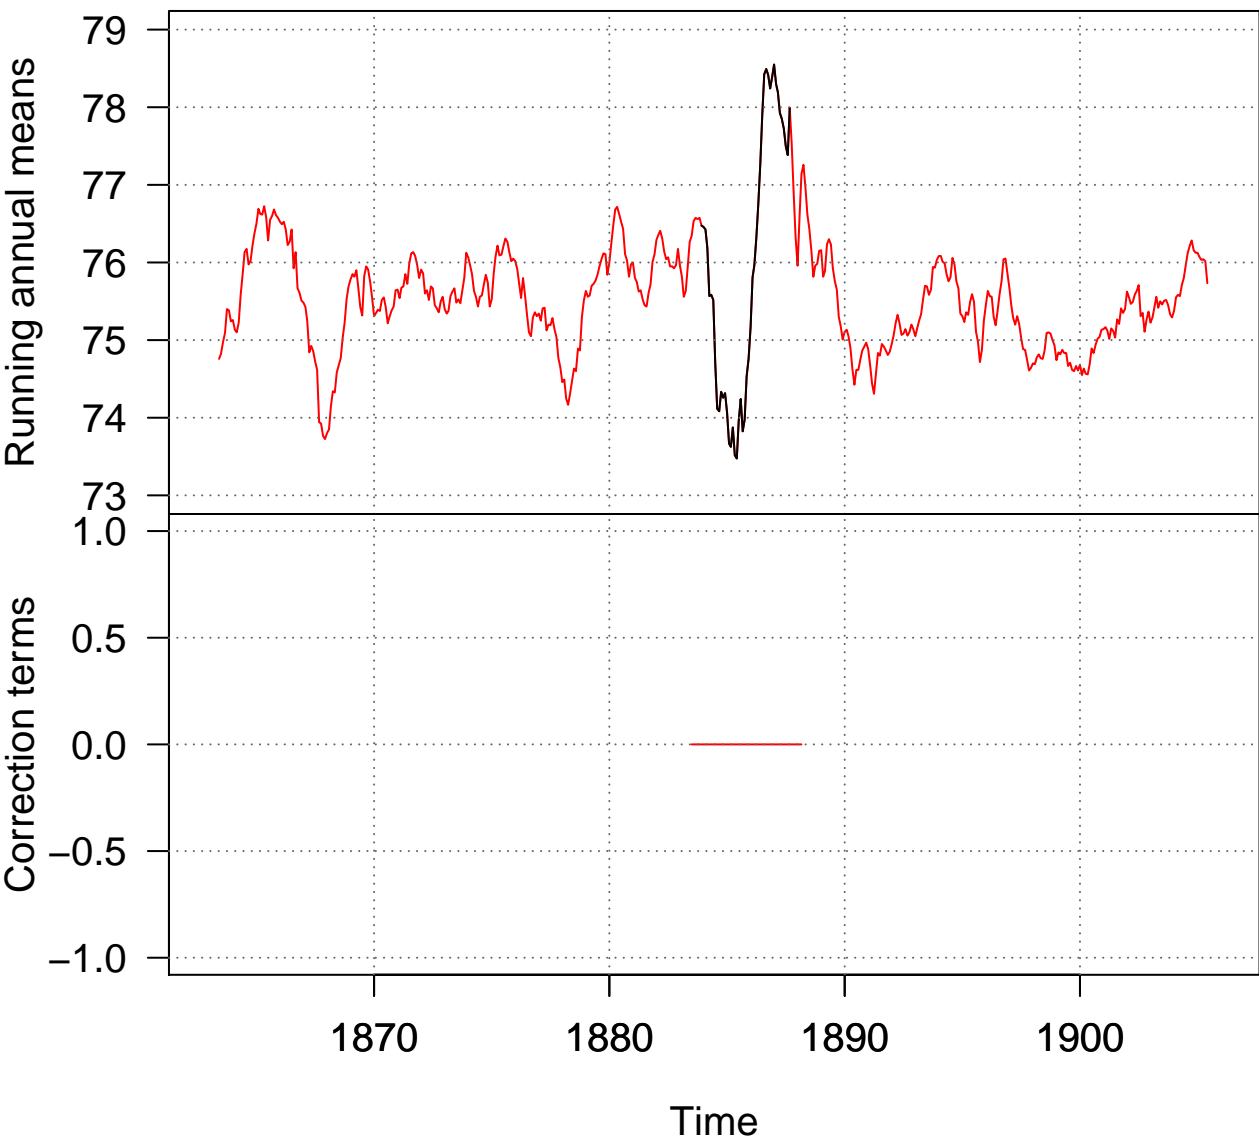

# Histogram of standardized anomalies

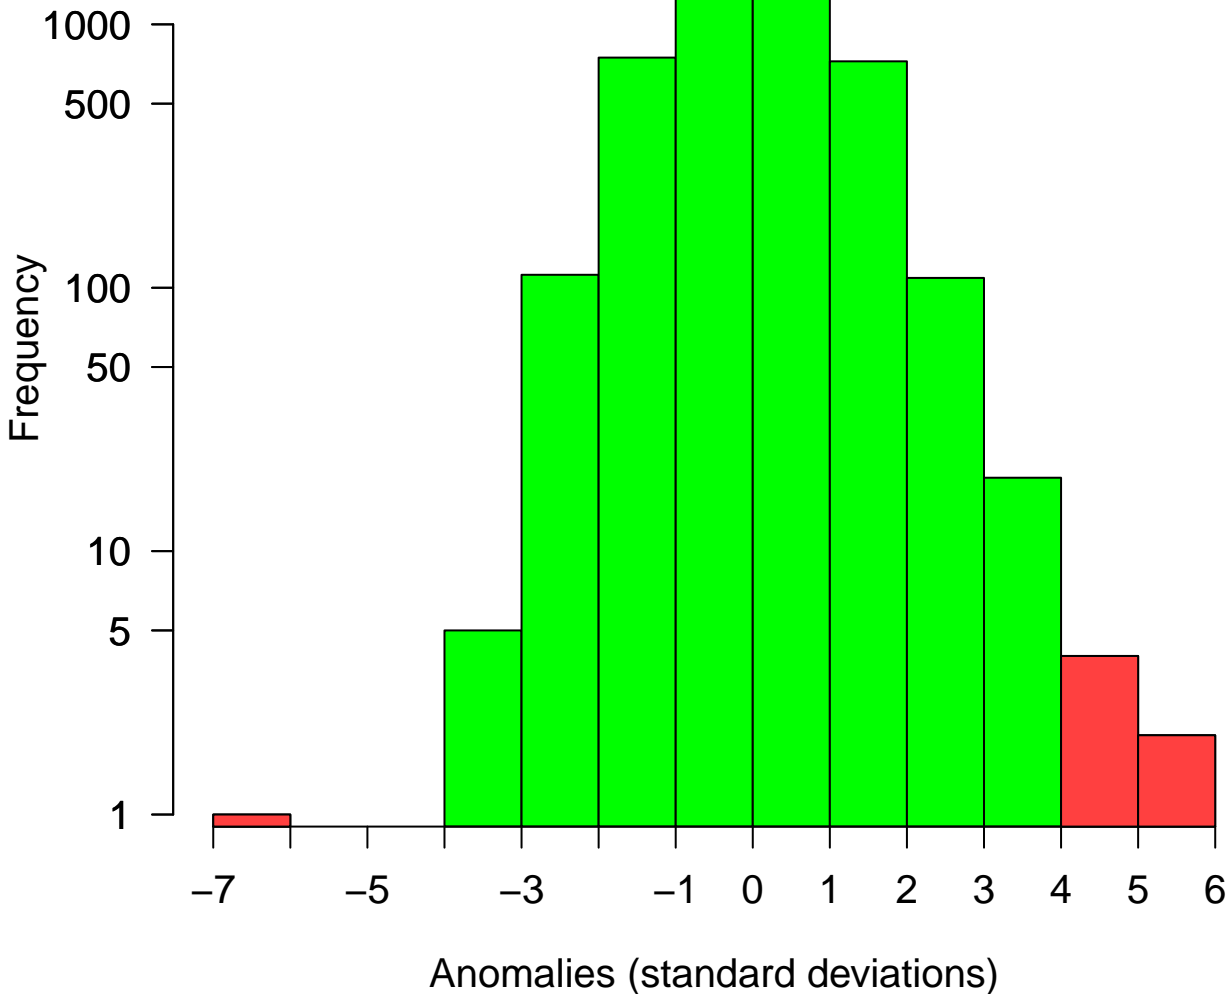

**Histogram of maximum windowed SNHT**

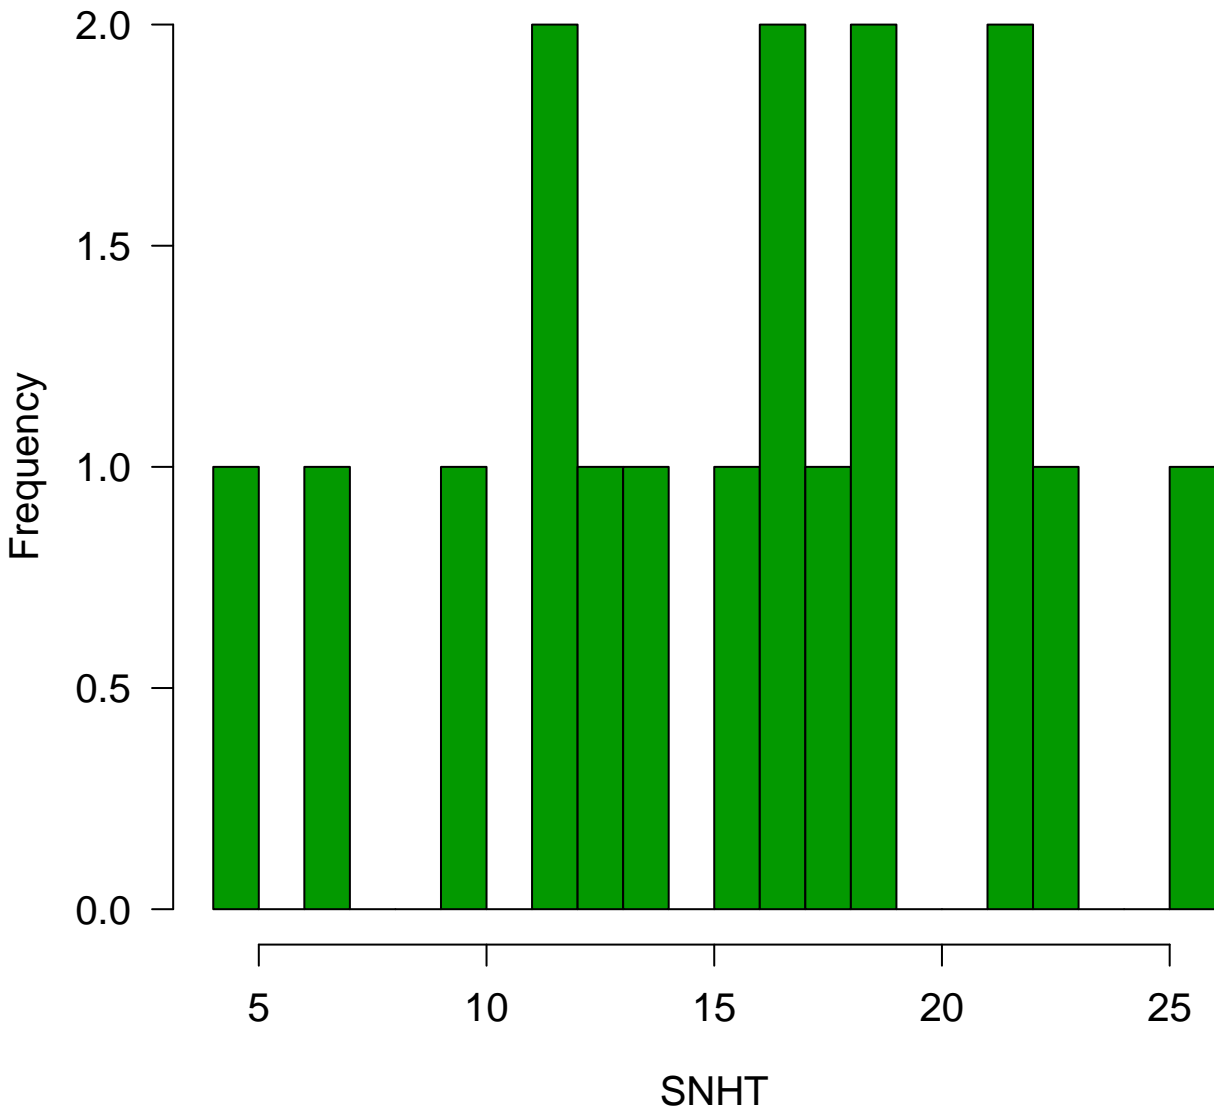

**Histogram of maximum global SNHT**

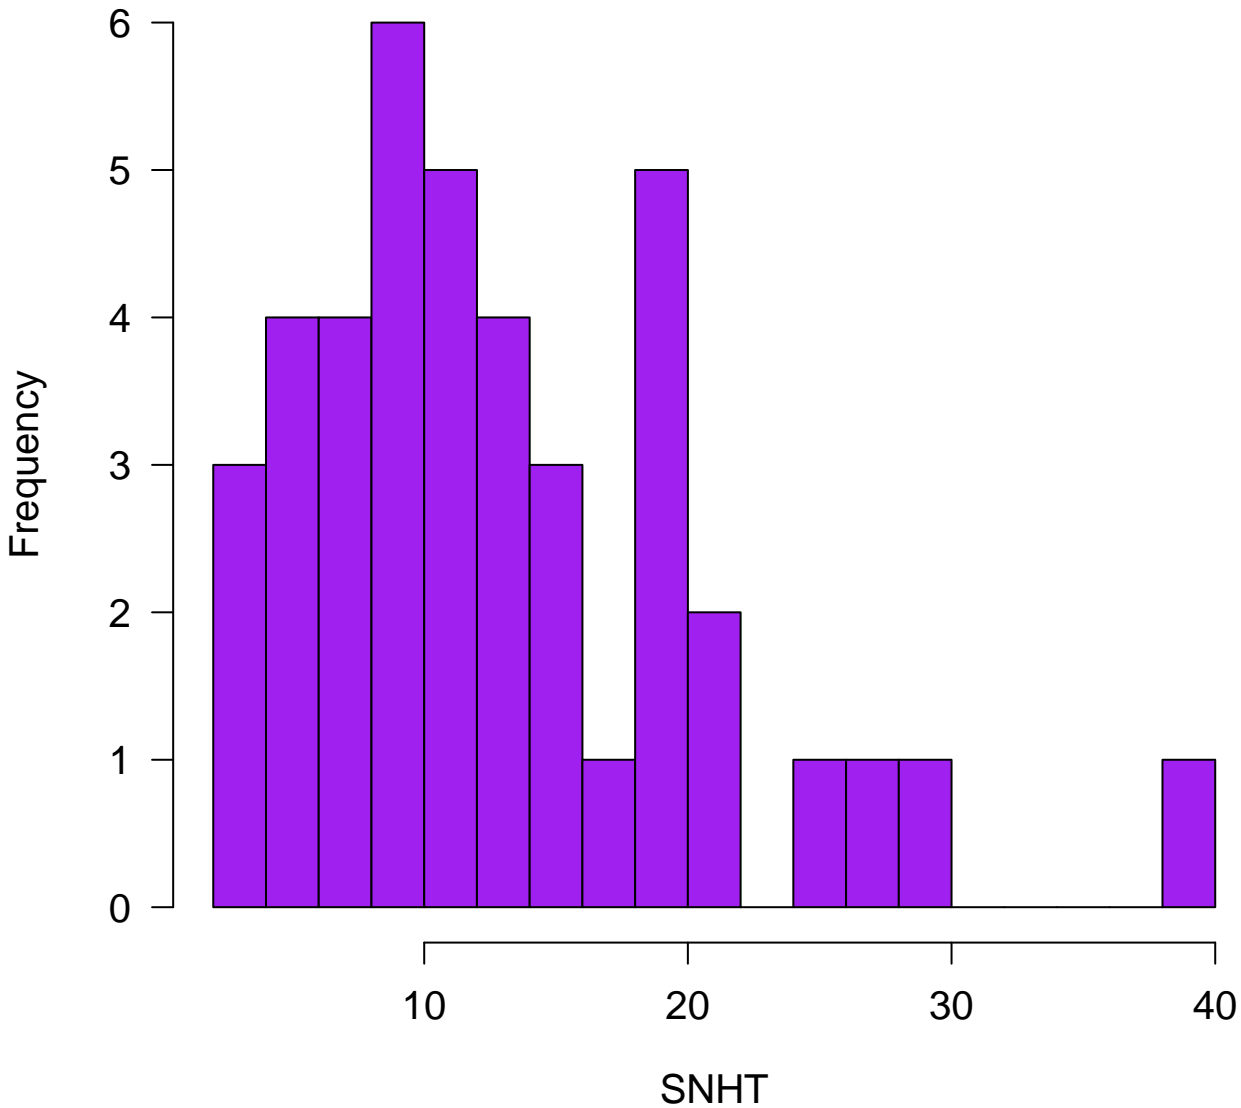



**Station's quality/singularity**

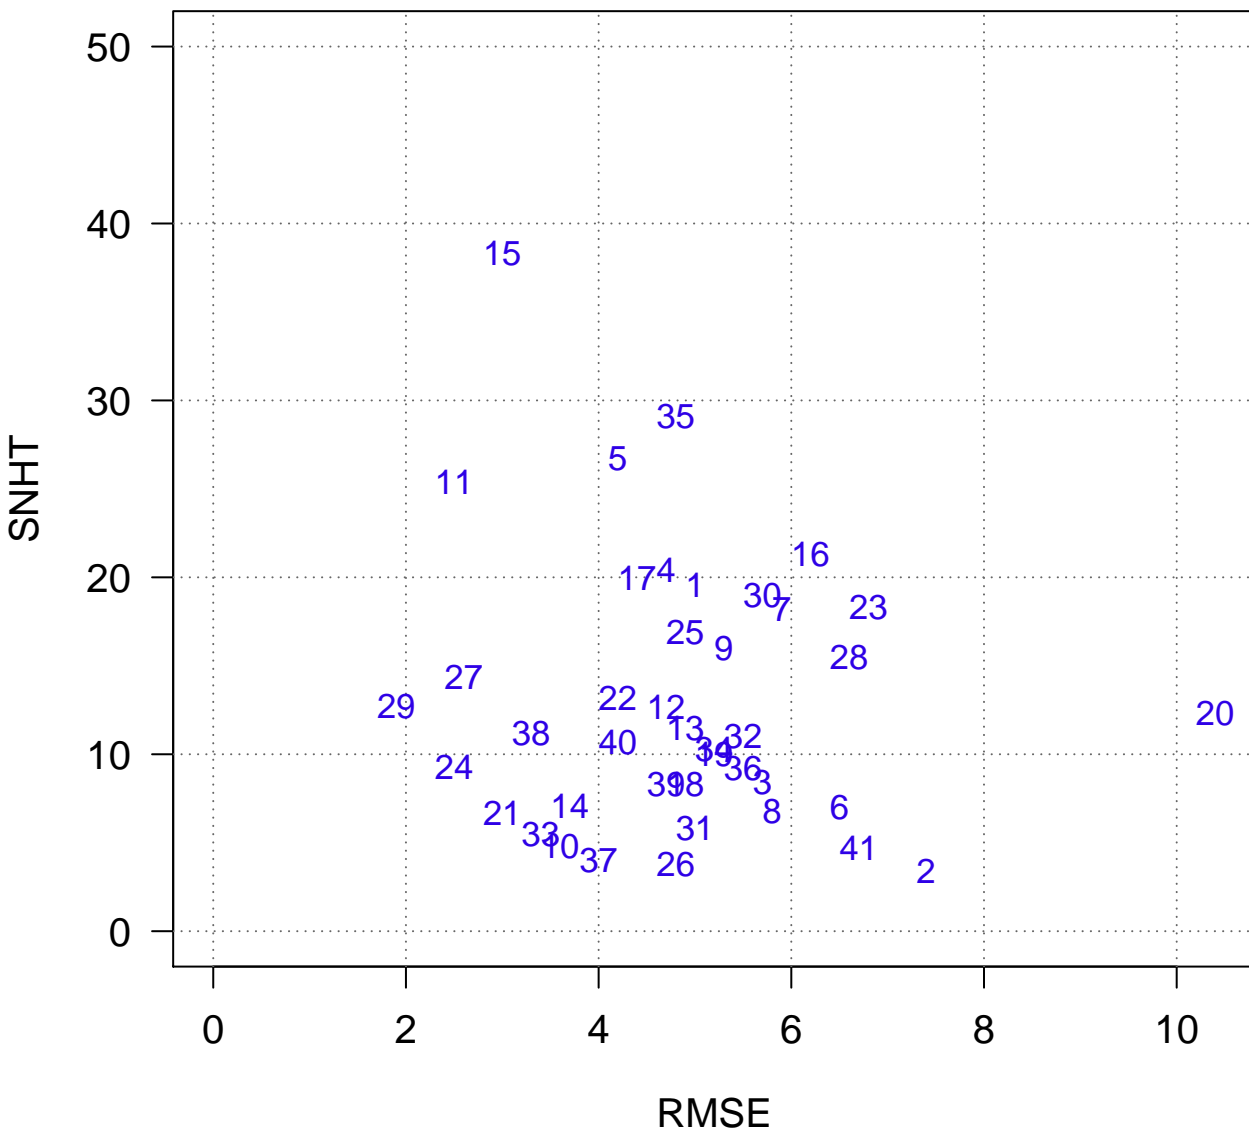

Supplement: Supplementary file 2 [file essd-17-2437-2025-supplement.zip]
