# Supplementary material for: Nineteenth- and twentieth-century semi-quantitative surface ozone along subtropical European to tropical Africa Atlantic coasts
Source: Copernicus journal article supplement (doi:10.5194/essd-17-2437-2025), 2025-06-06
Supplement: Supplementary file 3 [file essd-17-2437-2025-supplement.zip]

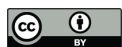

## *Supplement of*

# **Nineteenth- and twentieth-century semi-quantitative surface ozone along subtropical European to tropical Africa Atlantic coasts**

**Juan A. Añel et al.**

*Correspondence to:* Juan A. Añel ([j.anel@uvigo.gal](mailto:j.anel@uvigo.gal))

- [essd-17-2437-2025-supplement-title-page.pdf](#)
- [O3\\_1863-1905\\_brk.csv](#)
- [O3\\_Cimatol\\_homogeneity\\_output.pdf](#)
- [RH\\_Cimatol\\_homogeneity\\_output.pdf](#)

The copyright of individual parts of the supplement might differ from the article licence.
